# Supplementary material for: A Cdk1 phosphomimic mutant of MCAK impairs microtubule end recognition
Source: PeerJ. 2017 Dec 6;5:e4034. doi: 10.7717/peerj.4034 (PMC5723132; doi:10.7717/peerj.4034)
Supplement: Supplemental Information 1 — Raw microtubule lengths used to generate the microtubule depolymerisation rates plotted in Fig. 1B. [file peerj-05-4034-s004.xlsx]

## Sheet: WT
WT
	Microtubule length after addition of MCAK
Time/s	MT1	MT2	MT3	MT4	MT5	MT6	MT7	MT8	MT9	MT10	MT11	MT12	MT13	MT14	MT15	MT16	MT17	MT18	MT19	MT20
0	8.187	8.996	9.723	13.651	9.112	8.291	8.588	8.981	6.96	6.793	7.354	7.841	9.351	7.197	7.384	8.055	7.609	7.504	6.972	6.679
5	7.946	8.329	8.958	13.542	9.14	7.619	8.407	8.636	6.663	6.666	7.229	7.827	9.104	6.819	7.179	7.972	7.522	7.13	6.808	6.595
10	7.371	7.437	8.632	13.228	9.5	7.501	8.414	8.409	6.302	6.514	6.834	7.633	9.182	6.789	6.949	7.653	7.278	6.864	6.784	6.412
15	7.12	7.144	8.473	13.119	9.108	7.163	7.814	8.178	6.25	5.806	6.442	7.25	8.705	6.428	6.769	7.435	7.319	6.691	6.364	6.129
20	6.765	7.413	8.135	13.048	9.012	7.173	7.698	7.689	5.995	5.503	6.216	7.088	9.772	6.175	6.593	6.853	6.818	6.31	6.507	6.05
25	6.736	7.348	7.987	12.655	8.926	7.136	7.449	7.425	5.86	5.485	5.968	7.04	8.141	5.693	6.308	6.742	6.935	6.062	6.202	5.877
30	6.432	6.917	7.617	12.621	8.534	6.662	6.941	7.252	5.367	5.054	5.802	6.724	7.997	5.709	5.964	6.156	6.444	6.169	5.996	5.756
35	6.46	6.767	7.525	12.348	8.222	6.782	7.039	6.808	5.069	4.715	5.504	6.582	7.942	5.44	5.675	6.208	6.743	5.782	5.99	5.404
40	6.206	6.398	7.175	12.077	7.94	6.546	6.709	6.873	4.95	4.341	5.208	6.474	7.913	5.061	5.261	5.717	6.403	5.534	5.733	5.298
45	5.406	5.961	6.735	12.008	7.736	6.346	6.482	6.448	4.689	4.239	5.101	6.016	7.759	4.795	5.209	5.189	5.758	5.241	5.724	5.251
50	5.509	5.651	6.562	11.896	7.443	5.898	6.176	6.336	4.333	3.845	4.492	5.774	7.886	4.619	4.932	5.256	5.88	5.045	5.593	4.905
55	5.366	5.434	6.266	11.917	7.384	5.407	5.746	5.901	4.055	3.444	4.463	5.529	7.552	4.4	4.872	5.058	5.798	4.922	5.348	4.695
60	4.857	5.17	5.673	11.646	6.863	5.076	5.51	5.545	3.856	3.152	4.184	5.399	7.476	4.033	4.517	4.635	5.355	4.786	4.9	4.359
65	4.661	4.785	5.354	11.333	6.488	4.75	5.005	5.278	3.191	2.979	3.946	5.351	7.104	3.828	4.555	4.544	5.192	4.594	4.326	3.937
70	4.413	3.969	5.054	11.361	6.15	4.541	4.952	4.926	2.892	2.804	3.992	4.983	6.465	3.545	4.438	4.175	5.153	4.298	3.913	3.794
75	4.314	4.163	4.702	10.946	6.039	4.223	4.5	4.642	2.682	2.521	3.946	4.804	6.494	3.395	4.312	3.863	5.007	4.167	3.742	3.658
80	3.954	3.844	4.609	10.547	5.615	3.745	4.456	4.445	2.526	2.187	3.612	4.659	6.352	3.194	4.05	3.357	5.169	3.954	3.476	3.468
85	3.895	3.607	3.84	10.293	5.12	3.412	3.881	4.133	1.999	1.96	3.303	4.372	5.795	3.048	3.75	3.254	4.764	3.887	3.454	2.928
90	3.669	3.115	3.503	9.89	4.472	3.108	3.435	3.597	1.751	0.954	2.93	4.269	5.266	2.851	3.556	2.918	5.043	3.645	3.122	2.827
95	3.664	2.875	3.381	9.778	4.595	3.065	3.308	3.646	1.316	1.075	3.094	3.982	5.067	2.549	1.744	2.81	4.5	3.472	2.963	2.379
100	3.109	2.699	3.157	9.555	4.103	2.526	2.873	2.916	1.306	0.849	2.752	3.71	4.869	2.431	2.856	2.437	4.516	3.365	2.655	2.23
105	2.836	2.373	2.744	9.173	3.921	2.615	2.698	2.608	0.897	0.666	2.747	3.387	4.403	2.078	2.902	2.227	4.469	3.232	2.348	2.402
110	2.643	2.274	2.362	8.814	3.551	2.167	2.327	2.475	0.76	0.56	2.279	3.307	4.254	1.976	2.385	1.847	4.291	3.061	2.339	2.127
115	2.319	2.077	2.341	8.727	3.236	1.712	2.029	2.011	0.71	0.629	2.409	2.977	4.062	0.956	2.184	1.724	4.218	2.853	2.061	1.692
120	2.188	1.622	2.015	8.297	3.168	1.793	1.848	2.013			2.108	3.049	3.809	0.804	1.626	1.428	4.191	2.721	1.982	1.648
125	2.088	1.392	1.892	8.132	2.904	1.62	1.488	1.8			1.85	2.889	3.683	0.761	1.449	1.371	3.977	2.603	1.807	1.039
130	1.628	0.856	1.563	7.639	2.825	1.251	1.265	1.701			1.766	2.921	3.531	0.762	0.985		3.692	2.456	1.549
135	1.436	0.858	1.423	7.519	2.702	1.306	0.917	1.75			1.542	2.705	3.21	0.684			3.677	2.178	1.296
140	1.061	0.752	1.265	6.8	2.568	1.362	0.801	0.841			1.198	2.497	2.893				3.541	2.151	1.248
145	0.713		0.971	6.542	2.364	0.778	0.901	0.897			1.111	2.184	2.719				3.484	1.898	1.045
150	0.704		0.831	6.097	2.099	0.747	0.741	0.632			0.855	2.013	2.355				3.544	1.744	0.774
155	0.6		0.637	5.815	1.513	0.934	0.712	0.575			0.782	1.987	2.148				3.587	1.578	1.665
160				5.824	1.085	0.807	0.713				0.823	1.762	2.016				3.682	1.348	0.892
165				5.389	0.839						0.72	1.461	1.828				3.557	1.199	0.922
170				4.856	0.852						0.543	1.139	1.488				3.367	0.98
175				4.602	1.042						0.568	1.15	1.38				3.126	0.95
180				4.501	0.759						0.568	0.839	1.25				2.876	0.76
185				4.31	0.606							0.543	1.081				3.074	0.778
190				4.056	0.637								0.823				2.77	0.704
195				3.751	0.629												2.872	0.734
200				3.869	0.586												2.772
205				3.111													2.85
210				2.969													2.808
215				2.68													2.655
220				2.38													2.562
225				2.146													2.644
230				1.968													2.626
235				1.919													2.42
240				1.743													2.391
245				1.535													2.162
250				1.322													2.01
255				1.035													1.97
260				0.964													2.107
265				0.814													2.073
270				0.796													1.917
275				0.668													2.055
280				0.66													2.004
285				0.637													1.947
290				0.677													1.856
295				0.674													1.489
300																	1.579
305																	1.15
310																	1.29
315																	1.022
320																	0.917
325																	1.045

## Sheet: T537E
T537E
	Microtubule length after addition of MCAK
Time/s	MT1	MT2	MT3	MT4	MT5	MT6	MT7	MT8	MT9	MT10	MT11	MT12	MT13	MT14	MT15	MT16	MT17	MT18	MT19	MT20
0	9.49	6.376	6.737	8.253	7.053	8.762	5.24	10.115	5.58	5.584	11.868	7.677	7.786	10.183	11.004	12.025	14.026	10.287	8.148	7.778
5	9.497	6.455	6.643	8.461	6.977	8.408	5.179	10.119	5.552	5.887	11.574	7.425	7.895	10.041	11.121	11.573	13.831	10.107	8.067	7.841
10	9.508	6.432	6.608	8.112	7.013	8.597	5.395	10.127	5.51	5.68	11.489	7.467	7.495	9.942	10.719	11.803	13.647	10.184	7.661	7.437
15	9.527	6.392	6.729	8.178	6.884	8.686	5.394	10.242	5.334	5.56	11.65	7.876	7.827	10.165	11.11	12.279	14.213	9.848	8.008	7.453
20	9.35	6.569	6.601	8.199	6.836	8.672	5.276	10.048	5.379	5.606	11.703	7.777	7.824	10.039	11.072	11.969	13.87	10.115	8.056	7.612
25	9.292	6.308	6.482	8.19	6.984	8.686	5.272	10.272	5.581	5.629	11.602	7.658	7.99	9.79	10.94	12.244	14.275	0.779	8.056	7.673
30	9.332	6.588	6.741	8.151	6.864	8.616	5.222	10.263	5.48	5.485	11.778	7.635	7.684	9.955	11.042	12.084	13.833	10.008	7.912	7.612
35	9.354	6.607	6.719	8.245	6.753	8.498	5.135	9.899	5.374	5.547	11.733	7.622	8.075	9.931	11.005	12.067	14.36	10.06	7.613	7.669
40	9.209	6.184	6.575	8.034	7.061	8.429	5.164	9.773	5.299	5.61	11.343	7.446	7.968	10.175	11.093	11.815	14.023	9.8	7.546	7.944
45	9.317	6.588	6.653	8.2	6.852	8.504	5.306	10.175	5.402	5.478	11.846	7.624	7.804	10.048	11.42	11.827	14.156	10.037	8.094	7.577
50	9.04	6.317	6.665	8.12	6.904	8.481	5.382	10.141	5.33	5.577	11.445	7.161	7.822	10.13	10.985	12.082	14.116	10.335	8.04	7.701
55	9.324	6.308	6.547	8.093	7.066	8.217	5.189	9.991	5.303	5.576	11.598	7.453	8.231	10.35	11.118	12.184	14.084	10.155	7.911	7.48
60	9.382	6.323	6.527	8.32	6.933	8.436	5.265	10.01	5.333	5.603	11.724	7.277	7.894	10.089	10.678	12.095	0.81	9.805	8.153	8.006
65	9.192	6.321	6.509	8.098	6.992	8.191	5.065	10.071	5.211	5.635	11.803	7.39	7.963	10.038	10.995	12.03	13.907	9.745	7.99	7.684
70	9.274	6.467	6.75	8.257	7.138	8.393	5.18	10.205	5.2	5.773	11.686	7.614	7.73	10.115	11.137	12.022	14.376	9.835	7.986	7.761
75	9.303	6.134	6.599	8.241	6.928	8.478	5.179	10.092	5.423	5.606	11.669	7.635	8.007	10.313	10.802	12.182	14.15	10.028	7.401	7.776
80	9.257	6.471	6.682	8.294	6.969	8.547	5.448	10.174	5.432	5.65	11.9	7.559	7.807	10.255	11.33	12.197	14.308	10.267	8.28	7.589
85	9.246	6.165	6.54	8.314	6.767	8.408	5.375	10.174	5.446	5.49	11.813	7.61	8.139	10.046	11.409	12.383	13.583	10.394	7.894	7.92
90	9.402	6.524	6.522	8.297	7.147	8.526	5.233	9.986	5.272	5.396	11.363	7.664	8.216	10.141	10.954	12.29	13.942	10.145	8.197	7.376
95	9.256	6.45	6.771	8.353	6.934	8.486	5.244	10.091	5.36	5.79	11.65	7.579	8.023	9.817	10.903	12.31	13.965	10	7.872	7.645
100	9.346	6.419	6.803	8.249	7.054	8.305	4.948	10.139	5.342	5.477	11.663	7.434	7.835	9.878	10.962	12.176	14.212	9.889	8.176	7.41
105	9.444	6.462	6.636	8.186	7.06	8.396	5.184	10.088	5.294	5.471	11.762	7.458	7.86	10.195	10.91	12.15	14.274	10.331	8.239	7.606
110	9.305	6.324	6.606	8.048	6.948	8.59	5.14	10.275	5.34	5.305	11.9	7.649	8.024	10.128	11.419	11.937	14.377	10.062	7.838	7.856
115	9.285	6.394	6.715	8.157	6.911	8.393	5.116	10.019	5.369	5.266	11.788	7.622	7.691	10.058	11.077	12.13	14.033	9.849	8.198	7.648
120	9.147	6.26	6.614	8.133	6.945	8.042	5.222	9.941	5.498	5.328	11.797	7.762	7.648	9.968	11.174	12.105	14.168	10.465	8.407	7.556
125	9.314	6.25	6.507	8.16	6.867	8.208	5.027	10.101	5.388	5.464	11.801	7.823	7.792	10.36	11.049	12.246	13.599	10.188	8.002	7.522
130	8.92	6.177	6.489	8.121	6.808	8.345	5.076	10.004	5.161	5.451	11.783	7.509	7.735	10.199	10.647	12.088	13.829	10.046	7.688	7.85
135	8.974	6.253	6.592	8.021	7.018	8.257	4.965	9.918	5.159	5.474	11.565	7.86	7.692	10.14	11.432	11.944	14.281	10.229	7.947	7.598
140	9.096	6.232	6.574	8.204	6.737	8.44	5.044	10.053	5.203	5.208	11.412	7.539	7.742	9.992	10.766	12.045	14.234	10.171	7.978	7.621
145	9.11	6.045	6.62	7.964	6.884	8.173	4.922	10.346	5.236	5.059	11.756	7.496	7.848	10.576	10.959	12.22	13.948	10.276	8.062	7.714
150	9.121	6.164	6.768	8.138	6.612	8.207	5.065	9.856	5.197	4.907	11.711	7.57	7.947	10.168	10.943	12.229	14.399	10.379	8.477	7.821
155	9.208	6.11	6.541	7.998	6.767	8.147	5.272	10.173	5.205	5.371	11.775	7.543	8.128	10.247	10.737	11.848	14.251	10.273	8.03	7.533
160	9.098	6.087	6.553	8.103	6.897	8.335	4.972	10.271	5.138	5.27	11.841	7.771	8.258	10.286	10.738	12.339	14.451	10.139	8.069	7.955
165	8.828	6.195	6.454	7.83	6.839	8.214	4.91	10.075	5.073	4.953	11.659	7.812	8.131	9.945	11.003	12.334	14.221	10.417	8.07	7.974
170	9.155	6.309	6.651	8.109	6.917	8.233	5.02	10.04	4.913	5.381	11.769	7.7	7.768	10.334	11.056	12.192	14.32	10.288	8.294	7.807
175	9.018	5.968	6.341	8.077	6.962	8.078	4.989	9.963	4.872	5.272	11.758	7.819	8	9.939	11.167	12.191	14.126	9.918	8.112	7.925
180	8.777	5.759	6.519	7.928	6.592	7.973	4.997	9.731	5.077	5.181	11.68	7.614	7.857	10.264	11.054	12.441	14.633	9.978	8.066	7.956
185	8.74	6.217	6.487	8.177	6.412	7.806	4.73	9.77	5.091	5.346	11.545	7.529	7.262	10.043	10.842	12.261	14.284	10.282	8.214	7.874
190	8.797	6.206	6.459	7.982	6.798	7.948	4.725	9.854	5.129	5.157	11.907	7.787	7.975	10.063	10.969	12.37	14.304	10.198	8.128	7.673
195	8.778	5.934	6.448	7.851	6.749	8.124	4.933	10.161	4.917	5.197	11.854	7.749	8.058	10.345	10.737	12.177	14.217	10.452	8.263	7.773
200	8.973	5.841	6.277	7.976	6.549	7.893	4.771	9.869	5.095	5.186	11.503	7.516	8.124	10.108	10.91	12.166	14.314	9.989	8.068	7.51
205	8.978	5.982	6.506	8.099	6.65	7.887	4.555	9.822	4.905	5.061	11.824	7.529	8.161	10.266	11.194	12.22	14.09	9.84	8.062	7.767
210	8.433	5.871	6.502	8.018	6.657	7.833	4.7	10.039	4.942	5.254	11.866	7.616	7.835	9.965	11.057	11.942	14.136	10.572	8.027	7.728
215	8.855	5.741	6.5	7.817	6.651	7.866	4.757	9.86	4.733	5.075	11.74	7.327	7.756	10.144	11.22	12.116	14.124	10.234	8.105	7.802
220	8.993	6.114	6.401	8.037	6.895	7.934	4.902	9.927	4.887	5.067	11.598	7.468	7.764	6.315	10.992	12.281	13.977	10.358	8.154	7.796
225	8.975	5.992	6.372	8.073	6.922	7.98	4.884	10.176	4.859	5.268	11.533	7.505	8.122	10.087	10.995	12.37	14.099	9.889	8.157	7.686
230	8.866	6.071	6.36	8.092	6.83	7.921	4.825	9.925	4.767	5.217	11.796	7.678	7.937	10.174	10.702	11.975	14.217	10.2	7.872	7.487
235	8.993	5.865	6.522	7.994	6.667	7.819	4.667	9.879	4.701	5.093	11.758	7.432	7.867	10.112	10.767	12.39	14.225	9.789	7.99	7.897
240	8.868	6.011	6.508	7.774	6.837	7.934	4.752	9.965	5.019	5.361	11.806	7.612	7.843	10.135	10.779	12.18	14.386	10.411	8.577	7.814
245	8.94	5.979	6.426	7.898	6.786	7.747	4.771	9.93	4.812	5.043	11.904	7.831	7.817	10.421	11.115	12.653	13.939	10.271	8.312	7.932
250	8.862	6.055	6.526	7.608	6.898	7.991	4.828	10.101	4.749	5.148	11.685	7.691	7.962	10.019	11.01	12.399	14.201	10.316	8.074	7.869
255	8.847	6.251	6.644	7.663	6.814	7.719	4.85	9.907	4.71	5.093	11.98	7.634	7.885	10.137	10.935	12.159	14.418	10.168	8.429	7.784
260	8.94	6.067	6.538	7.933	6.759	8.139	4.664	10.033	4.874	5.151	11.836	7.573	7.891	9.82	10.966	12.344	14.119	9.869	8.073	7.708
265	8.791	6.021	6.316	7.878	6.675	7.769	4.738	10.24	4.657	5.187	11.792	7.564	7.675	10.272	10.867	12.515	13.824	9.822	8.366	7.576
270	9.078	6.104	6.357	7.677	6.723	7.873	4.895	9.973	5.068	5.348	11.724	7.7	8.039	10.031	10.99	12.144	14.571	9.383	7.804	7.693
275	9.02	5.999	6.449	7.648	6.883	7.958	4.639	10.042	4.925	5.081	11.767	7.539	8.06	10.106	10.654	12.151	14.313	10.007	7.897	7.781
280	9.126	6.09	6.449	7.749	6.749	7.749	4.656	9.98	4.744	5.25	11.691	7.679	8.112	10.233	10.852	12.314	14.439	10.162	7.929	7.529
285	9.026	6.093	6.575	7.753	6.643	7.837	4.659	10.174	4.576	5.081	11.783	7.492	8.18	10.354	11.045	12.258	14.634	10.265	8.116	7.787
290	8.811	6.105	6.548	7.666	6.759	7.66	4.827	10.028	4.577	4.906	11.849	7.573	8.027	10.15	10.671	12.242	13.978	10.074	8.387	7.81
295	8.818	6.04	6.593	7.817	6.776	7.974	4.778	9.703	4.599	5.041	11.472	7.725	7.699	10.3	11.05	12.243	14.522	10.296	8.117	7.933
300	8.937	6.148	6.4	7.708	6.837	7.891	4.668	9.959	4.706	5.048	12.122	7.852	7.939	10.214	10.825	12.585	13.943	10.125	7.994	7.901
305	8.72	6.068	6.352	7.598	6.897	7.73	4.647	9.889	4.7	4.917	12.055	7.666	8.004	10.072	10.926	12.323	14.136	10.08	8.373	7.567
310	8.787	6.277	6.361	7.694	6.962	7.775	4.593	9.815	4.688	5.113	11.94	7.77	8.04	10.282	11.002	11.938	14.24	10.403	7.782	7.733
315	8.825	6.165	6.361	7.855	6.699	7.785	4.709	9.867	4.882	4.906	11.598	7.514	7.878	9.993	10.802	11.982	14.179	9.824	8.121	7.734
320	8.871	5.984	6.339	7.712	6.929	7.682	4.391	9.589	4.725	5.134	11.73	7.664	7.927	10.171	10.832	12.312	14.074	9.815	8.309	7.707
325	8.753	6.248	6.473	7.644	6.737	7.637	4.645	9.785	4.64	5.202	11.811	7.471	7.999	10.303	10.771	12.273	14.273	10.115	8.269	7.761
330	8.805	6.087	6.36	7.52	6.573	7.657	4.763	9.672	4.783	5.11	11.993	7.294	8.23	9.879	10.924	12.113	14.267	9.754	8.256	7.862
335	8.798	6.307	6.469	7.406	6.763	7.51	4.46	9.598	4.779	5.064	11.684	7.912	8.028	10.137	10.823	12.552	14.13	9.931	7.854	7.541
340	8.834	6.136	6.456	7.5	6.911	7.573	4.602	9.594	4.659	4.919	11.977	7.582	7.764	10.275	10.692	12.107	14.341	9.98	7.904	7.827
345	8.741	5.812	6.418	7.444	6.69	7.663	4.527	9.507	4.785	4.61	11.661	7.568	7.96	10.089	10.627	12.534	14.305	9.946	7.871	7.901
350	8.664	6.093	6.539	7.522	6.851	7.426	4.536	9.325	4.599	4.845	11.816	7.46	8.057	10.34	10.837	12.297	14.2	9.997	8.305	7.697
355	8.89	5.999	6.223	7.607	6.703	7.511	4.432	9.594	4.521	4.775	12.004	7.497	7.747	10.107	11.065	12.177	14.169	9.918	8.093	7.999
360	8.502	5.798	6.384	7.339	6.751	7.617	4.488	9.429	4.73	4.799	11.885	7.526	8.002	9.886	10.662	12.25	13.975	10.162	8.007	7.807
365	8.714	5.952	6.227	7.439	6.582	7.367	4.558	9.513	4.674	4.88	11.461	7.623	7.893	9.97	11.232	12.026	14.727	9.749	8.146	7.931
370	8.425	5.728	6.31	7.409	6.586	7.539	4.341	9.507	4.598	4.613	11.794	7.455	7.917	9.888	10.665	12.441	14.269	9.831	8.128	7.888
375	8.409	6.08	6.275	7.495	6.895	7.602	4.494	9.531	4.699	5.003	11.481	7.726	7.73	10.217	10.916	12.128	14.475	10.019	8.001	7.897
380	8.384	5.986	6.298	7.212	6.785	7.731	4.622	9.475	4.596	4.886	11.861	7.34	8.104	10.166	10.969	12.367	14.241	9.62	8.22	7.767
385	8.483	5.953	6.169	7.298	6.813	7.411	4.495	9.367	4.653	4.773	11.727	7.483	7.784	9.751	10.714	12.21	14.146	10.086	7.896	7.708
390	8.588	5.948	6.301	7.597	6.836	7.355	4.44	9.332	4.702	4.72	11.638	7.317	7.927	10.064	10.923	12.512	14.593	10.185	7.935	7.78
395	8.533	5.887	6.342	7.207	6.76	7.35	4.397	9.39	4.577	4.817	11.796	7.305	7.956	9.951	10.703	11.716	13.912	9.765	7.911	7.655
400	8.55	5.817	6.364	7.161	6.709	7.506	4.482	9.17	4.479	4.762	11.772	7.529	8.212	9.905	10.431	12.337	14.219	10.42	7.683	7.57
405	8.533	6.094	6.217	7.26	6.785	7.115	4.575	9.497	4.526	4.791	11.842	7.754	7.95	9.804	10.535	12.318	14.259	9.766	7.92	7.799
410	8.638	5.766	6.112	7.2	6.699	7.369	4.315	9.535	4.556	4.911	11.527	7.269	7.945	10.095	10.494	12.22	14.154	9.649	7.757	7.556
415	8.549	5.719	6.203	7.226	6.595	7.295	4.558	9.377	4.222	4.764	11.582	7.417	7.928	10.051	10.665	12.018	14.134	9.609	7.93	8.045
420	8.6	5.688	6.209	7.341	6.611	7.144	4.468	9.566	4.429	4.824	11.672	7.29	8.055	9.921	10.781	12.351	13.802	9.635	7.931	7.608
425	8.584	5.587	6.122	7.437	6.856	7.42	4.423	9.334	4.597	4.742	11.81	7.704	8.093	10.156	10.395	12.243	14.201	10.235	7.856	7.676
430	8.465	5.577	6.143	7.36	6.754	7.455	4.45	9.193	4.511	4.591	11.581	7.609	8.032	10.137	10.357	11.952	14.439	10.024	7.78	7.499
435	8.366	5.994	6.202	7.402	6.782	7.392	4.272	9.232	4.302	4.869	11.702	7.5	8.184	10.188	10.822	12.235	14.153	10.23	8.084	7.86
440	8.375	5.828	6.172	7.274	6.69	7.226	4.335	9.215	4.453	4.568	11.824	7.641	7.988	9.852	10.927	12.227	14.429	9.995	8.094	7.872
445	8.325	5.705	6.421	7.27	6.604	7.467	4.381	9.436	4.383	4.669	11.734	7.718	7.991	9.929	10.71	12.135	13.976	9.872	8.034	7.539
450	8.288	5.586	6.192	7.472	6.591	7.277	4.255	9.164	4.425	4.551	11.629	7.553	7.838	10.203	10.592	12.176	14.181	9.886	7.94	7.667
455	8.438	5.494	6.146	7.222	6.705	7.293	4.337	9.317	4.282	4.599	11.49	7.652	8.108	9.902	10.677	11.923	13.858	10.184	7.586	7.829
460	8.314	5.654	6.259	7.22	6.551	7.278	4.359	9.051	4.549	4.643	11.856	7.484	7.914	10.113	10.925	12.216	14.354	9.325	8	7.594
465	8.145	5.36	6.352	7.283	6.42	7.194	4.343	8.986	4.344	4.721	11.677	7.812	8.277	10.261	10.771	12.135	14.387	9.802	7.881	7.502
470	8.371	5.539	6.109	7.393	6.468	7.129	4.401	9.229	4.259	4.777	11.725	7.674	7.89	10.13	10.647	12.101	14.154	10.321	7.975	7.699
475	8.231	5.36	6.003	7.298	6.652	7.164	4.249	9.257	4.423	4.788	11.65	7.618	8.109	10.032	10.473	12.315	14.104	10.008	8.066	7.712
480	8.276	5.267	6.203	7.355	6.613	7.269	4.303	9.123	4.324	4.636	11.677	7.696	7.732	10.006	11.012	11.825	14.491	9.895	7.678	7.954
485	8.402	5.565	6.169	7.333	6.556	7.303	4.229	9.145	4.23	4.651	11.835	7.624	8.026	10.348	10.947	12.294	14.196	10.02	8.171	7.506
490	8.247	5.388	6.231	7.347	6.781	7.379	4.245	9.446	4.21	4.702	11.617	7.443	7.738	10.104	10.689	12.136	14.162	9.961	8.046	7.724
495	8.381	5.363	6.122	7.212	6.622	7.378	4.308	9.396	4.322	4.541	11.88	7.461	7.806	9.849	10.954	12.131	14.258	10	7.85	7.856
500	8.383	5.391	6.152	7.317	6.662	7.201	4.299	9.183	4.267	4.566	11.724	7.442	7.865	10.005	10.72	12.074	14.214	9.889	8.063	7.718
505	8.397	5.391	6.144	7.225	6.651	7.301	4.153	9.34	4.17	4.633	11.559	7.451	8.09	10.155	10.587	12.227	14.253	9.666	7.888	7.763
510	8.12	5.432	6.227	7.178	6.642	7.233	4.158	9.426	4.13	4.769	11.924	7.62	7.762	9.95	10.307	12.086	14.03	9.985	7.851	7.62
515	8.258	5.185	6.268	7.318	6.711	7.027	4.114	9.094	4.246	4.549	12.133	7.476	8.169	9.986	10.55	12.042	14.212	9.879	8.237	7.701
520	8.279	5.506	6.172	7.164	6.562	7.037	4.191	9.357	4.38	4.659	12.044	7.566	8.28	10.06	10.354	11.918	14.37	10.1	7.943	7.603
525	8.167	5.076	6.085	7.034	6.503	7.207	4.24	9.058	4.256	4.613	11.974	7.451	7.746	10.116	10.635	12.272	14.015	9.937	8.065	7.815
530	8.244	5.072	6.01	7.145	6.498	7.022	4.235	9.306	4.306	4.729	11.858	7.604	8.188	10.116	10.399	11.757	14.583	9.83	8.087	7.589
535	8.176	5.319	6.04	7.199	6.436	6.797	4.095	9.15	4.214	4.771	11.721	7.363	8.003	10.088	10.801	12.096	14.246	9.756	8.178	7.793
540	8.2	5.209	6.029	7.355	6.439	7.108	4.088	8.912	4.154	4.654	11.713	7.528	8.037	9.942	10.232	11.839	14.56	9.84	8.149	7.992
545	8.117	5.01	6.051	7.101	6.547	6.757	4.134	8.912	4.021	4.523	11.913	7.779	8.099	9.916	10.402	12.22	14.056	10.033	7.893	7.681
550	8.161	5.107	5.975	7.194	6.228	6.68	3.895	8.89	4.109	4.609	11.782	7.418	8.017	9.78	10.674	12.098	14.331	9.994	8.043	7.68
555	7.887	4.953	5.939	7.098	6.306	6.955	4.024	8.834	4.215	4.463	11.824	7.753	7.985	10.198	10.437	12.148	14.607	9.298	8.467	7.604
560	8.055	5.027	5.898	7.137	6.236	6.856	4.209	8.961	4.302	4.449	11.608	7.479	7.821	10.134	10.517	11.967	14.094	9.97	8.242	7.758
565	8.02	4.998	6.027	7.149	6.51	6.854	4.008	9.179	4.191	4.597	11.9	7.398	7.985	10.199	10.577	12.28	14.239	10.076	7.997	7.805
570	8.062	4.937	5.808	7.053	6.397	6.891	4.038	8.797	4.151	4.486	11.909	7.491	7.661	9.834	10.439	11.996	14.166	10.015	8.115	7.938
575	7.923	4.831	5.973	7.089	6.47	6.627	3.992	8.845	3.988	4.662	11.865	7.46	7.933	9.908	10.658	12.172	14.182	9.849	7.79	7.395
580	8.101	4.936	5.746	7.27	6.221	6.537	3.999	8.715	3.974	4.689	11.877	7.475	8.078	9.972	10.874	12.146	14.259	9.903	7.955	7.852
585	7.91	4.966	5.852	7.109	6.543	6.621	4.006	9.049	4.135	4.758	11.635	7.406	8.079	9.6	10.438	12.348	13.982	9.693	7.409	7.703
590	7.964	4.902	5.803	7.136	6.298	6.813	3.901	8.978	4.203	4.565	12.039	7.703	7.778	9.881	10.665	12.185	13.988	10.186	7.984	7.671
595	7.938	4.867	5.94	7.155	6.308	6.913	3.787	8.826	4.11	4.624	11.889	7.553	7.854	9.955	10.654	11.993	13.887	10.022	8.07	7.47
600	7.947	4.751	5.937	7.262	6.438	6.86	3.856	8.838	4.08	4.765	11.594	7.583	7.707	10.044	10.902	12.092	14.166	10.293	7.826	7.448
605	8.07	4.77	5.826	7.234	6.553	6.885	4.006	8.924	4.127	4.552	11.586	7.687	7.641	9.97	10.43	11.923	14.22	9.62	7.953	7.502
610	8.101	4.755	5.902	7.168	6.226	6.845	3.892	8.82	4.057	4.614	11.445	7.287	7.827	10.074	10.544	12.077	14.085	10.074	8.255	7.788
615	8.378	4.697	5.791	7.103	6.568	6.85	3.735	9.166	4.114	4.668	11.748	7.582	7.912	9.57	10.297	12.188	13.779	9.914	7.952	7.552
620	8.037	4.814	5.749	7.038	6.437	6.791	3.878	8.94	4.14	4.676	11.756	7.184	7.656	9.803	10.532	12.202	14.092	9.604	8.399	7.744
625	8.108	4.677	5.729	7.156	6.257	6.689	3.623	8.943	4.251	4.569	11.675	7.551	7.846	9.941	10.766	12.05	14.113	9.996	7.891	7.328
630	8.155	4.481	5.904	7.158	6.342	6.96	3.737	8.989	4.112	4.621	11.785	7.502	7.485	9.96	10.139	11.9	14.112	9.699	8.066	7.55
635	8.097	4.799	5.628	7.053	6.18	6.62	3.704	8.802	4.032	4.511	11.441	7.534	7.86	9.993	10.662	12.003	13.935	10.003	7.726	7.493
640	8.005	4.445	5.837	7.048	6.517	6.947	3.74	9.006	3.995	4.529	11.677	7.352	7.562	10.124	10.371	12.113	13.917	9.471	7.949	7.657
645	8.17	4.595	5.738	7.138	6.415	6.809	3.482	8.699	3.974	4.629	11.688	7.36	7.826	9.598	10.326	12.164	14.166	10.104	8.258	7.737
650	8.036	4.4	5.763	7.035	6.16	6.569	3.709	8.928	3.876	4.416	11.804	7.452	7.885	9.731	11.076	11.985	14.194	9.819	8.04	7.586
655	8.001	4.266	5.567	7.22	6.313	6.691	3.569	9.032	4.089	4.546	11.382	7.497	7.592	10.043	10.495	12.116	14.424	9.568	7.6	7.436
660	7.827	4.401	5.784	7.129	6.355	6.715	3.69	8.691	3.873	4.409	11.722	7.362	7.92	9.729	10.777	11.995	14.024	9.399	7.748	7.523
665	8.053	4.254	5.706	7.058	6.283	6.515	3.472	8.544	3.917	4.611	11.753	7.28	7.513	10.013	10.493	11.969	14.348	10.076	8.09	7.649
670	7.907	4.351	5.677	6.998	6.218	6.598	3.599	8.604	4.188	4.58	11.992	7.208	7.821	9.793	10.367	12.343	14.103	9.536	7.804	7.568
675	7.627	4.235	5.689	7.1	6.325	6.556	3.648	8.85	3.951	4.582	11.907	7.396	7.812	9.992	10.598	12.273	14.17	9.602	8.03	7.453
680	8.101	4.389	5.671	7.066	6.271	6.551	3.638	8.974	3.977	4.649	11.735	7.227	7.875	9.991	10.585	12.216	14.084	9.564	7.863	7.497
685	7.981	4.376	5.583	7.173	6.263	6.722	3.426	8.839	4.072	4.598	11.681	7.033	7.881	9.756	10.642	12.288	14.409	10.125	7.73	7.735
690	8.002	4.27	5.611	7.082	6.195	6.547	3.487	8.738	3.985	4.62	11.688	7.449	7.821	10.029	10.438	11.935	13.961	9.645	7.752	7.553
695	7.858	4.259	5.638	7.136	6.233	6.644	3.465	8.749	4.016	4.496	11.436	7.168	7.737	9.746	10.529	11.552	14.129	9.674	7.458	7.358
700	8.032	4.177	5.608	6.924	6.203	6.504	3.431	8.698	4.138	4.602	11.696	6.919	7.875	9.994	10.542	12.231	13.857	9.717	7.753	7.495
705	7.862	4.088	5.618	7.096	6.317	6.666	3.557	8.628	4.161	4.651	11.6	7.329	7.512	9.72	10.054	11.92	14.168	9.993	7.389	7.586
710	8.174	4.118	5.447	7.066	6.38	6.509	3.317	8.674	4.059	4.38	11.859	7.704	7.655	10.097	10.553	11.988	14.481	9.752	7.512	7.828
715	7.967	3.87	5.428	7.052	6.439	6.606	3.383	8.618	4.031	4.466	11.33	7.072	7.507	10.067	10.505	11.808	14.18	9.391	8.139	7.649
720	8.067	3.951	5.631	7.154	6.367	6.559	3.333	8.77	4.085	4.529	11.753	7.203	7.748	9.781	10.783	12.098	14.142	9.53	7.702	7.361
725	8.058	3.788	5.687	7.024	6.403	6.529	3.304	8.592	3.959	4.385	11.392	7.147	7.626	9.584	10.311	12.245	13.964	9.898	7.976	7.67
730	7.941	3.937	5.567	6.894	6.257	6.517	3.249	8.554	3.95	4.491	11.955	7.507	7.828	9.846	10.485	11.673	14.399	9.346	7.938	7.2
735	8.008	4.098	5.591	7.062	6.156	6.587	3.294	8.603	4.073	4.488	11.318	7.286	7.892	9.743	10.328	11.979	14.065	9.711	7.883	7.372
740	7.953	3.97	5.45	6.977	6.159	6.475	3.162	8.584	4.117	4.363	11.336	7.347	7.724	9.621	10.22	12.252	14.023	9.203	8.022	7.098
745	7.871	3.957	5.471	6.985	6.097	6.418	3.333	8.512	4.078	4.446	11.657	7.245	7.387	9.858	10.375	12.159	14.381	9.728	7.718	7.336
750	7.78	3.863	5.494	6.843	6.003	6.389	3.29	8.376	4.034	4.321	11.605	7.456	7.536	9.377	10.207	11.787	14.464	9.804	7.869	7.302
755	7.796	3.796	5.303	6.896	5.99	6.503	3.159	8.551	3.909	4.583	11.528	7.496	7.698	9.585	10.327	11.996	13.991	9.3	8.013	6.976
760	7.704	3.907	5.202	6.857	6.128	6.377	3.389	8.492	3.989	4.406	11.439	7.375	8.094	9.715	10.08	11.817	14.204	9.037	7.781	7.186
765	7.772	3.79	5.386	6.655	6.176	6.396	3.257	8.398	3.971	4.484	11.561	7.098	7.569	9.526	10.632	11.969	13.884	9.748	0.685	7.642
770	7.784	3.683	5.407	6.722	6.201	6.148	3.278	8.182	4.002	4.339	11.622	7.245	7.908	9.728	10.271	11.696	14.801	9.291	7.644	7.247
775	7.652	3.69	5.334	6.774	6.02	6.254	3.317	8.305	3.884	4.386	11.373	7.355	7.524	9.678	10.142	11.72	13.533	9.408	8.399	7.683
780	7.699	3.791	5.398	6.921	5.912	6.329	3.088	8.265	3.847	4.306	11.643	7.222	7.574	9.508	10.558	11.81	13.973	9.297	7.431	7.473
785	7.455	3.571	5.387	6.787	6.077	6.321	3.181	8.107	4.007	4.338	11.591	7.076	7.781	9.592	10.584	11.865	13.792	9.514	7.625	7.455
790	7.636	3.521	5.16	6.824	6.068	6.211	3.09	8.159	3.872	4.387	11.783	7.164	7.71	9.626	9.917	12.223	13.919	9.784	7.746	7.383
795	7.541	3.601	5.355	6.705	5.888	6.35	3.198	7.965	3.737	4.38	11.562	7.129	7.746	9.381	10.377	11.903	14.256	9.497	7.391	7.606
800	7.466	3.65	5.17	6.791	6.168	6.25	3.1	7.985	3.869	4.324	11.565	7.282	7.415	9.401	10.381	11.712	13.907	9.385	7.496	7.453
805	7.351	3.533	5.254	6.742	6.051	6.124	3.26	8.284	3.889	4.396	11.316	7.249	7.618	9.898	10.287	11.459	13.94	9.725	8.012	7.498
810	7.286	3.485	5.377	6.735	6.105	6.322	3.24	8.182	3.93	4.387	11.412	7.407	7.531	9.687	10.408	12.252	14.483	9.639	7.785	7.317
815	7.489	3.784	5.34	6.795	5.892	6.327	3.155	8.362	3.748	4.186	11.493	7.226	7.432	9.563	10.462	12.26	13.975	9.277	7.775	7.296
820	7.271	3.476	5.241	6.831	5.996	6.318	3.022	8.204	3.953	4.319	11.454	7.394	7.632	9.36	10.298	11.913	13.778	9.474	8.172	7.557
825	7.453	3.417	5.167	6.632	5.888	6.351	3.172	8.012	3.909	4.27	11.757	7.057	7.721	9.568	10.285	11.661	14.268	9.282	7.914	7.263
830	7.579	3.507	5.225	6.749	6.026	6.252	2.925	8.171	3.805	4.137	11.603	7.099	7.574	9.54	9.86	12.034	13.564	9.902	7.654	7.215
835	7.377	3.363	5.082	6.696	5.906	6.132	3.079	7.851	3.689	4.132	11.449	7.452	7.659	9.67	10.252	11.799	13.602	9.485	7.947	7.39
840	7.248	3.423	5.435	6.49	5.687	6.35	2.986	7.937	3.778	4.081	11.696	7.36	7.518	9.501	10.188	11.815	13.747	9.919	7.697	7.726
845	7.356	3.404	5.275	6.609	5.6	6.075	3.039	8.099	3.79	4.136	11.495	7.185	7.278	9.326	10.461	11.892	13.862	9.567	8.189	7.092
850	7.229	3.211	5.324	6.64	5.5	6.234	2.9	7.921	3.66	4.165	11.7	7.067	7.272	9.666	9.699	11.55	13.867	9.459	7.969	7.351
855	7.181	3.41	5.327	6.564	5.659	6.131	3.158	7.911	3.779	4.202	11.466	7.047	7.541	9.595	10.356	11.556	14.098	9.22	7.706	7.254
860	7.253	3.29	5.4	6.692	5.591	6.278	2.947	8.005	3.71	4.143	11.643	7.418	7.688	9.574	9.833	12.096	13.976	9.341	7.713	7.545
865	7.165	3.214	5.246	6.672	5.608	6.02	2.855	7.969	3.712	3.794	11.493	7.065	7.592	9.853	10.529	11.699	13.936	9.627	7.383	7.715
870	7.285	3.45	5.256	6.684	5.828	6.081	2.849	8.029	3.588	4.11	11.531	7.207	7.607	9.828	10.169	11.938	14.329	9.252	7.501	7.646
875	7.095	3.314	5.373	6.634	5.727	6.201	2.982	7.939	3.72	4.092	11.787	7.351	7.362	9.583	10.216	11.785	13.828	9.502	7.934	7.294
880	7.169	3.238	5.228	6.603	5.628	5.884	3.012	8.042	3.561	4	11.491	7.268	7.658	9.848	10.401	11.873	14.085	9.814	7.852	7.318
885	7.317	3.287	5.39	6.488	5.593	6.048	2.844	7.99	3.867	4.042	11.536	7.234	7.805	9.548	9.496	12.143	14.008	9.4	7.448	7.493
890	7.296	3.269	5.244	6.683	5.537	6.265	2.97	8.069	3.763	3.815	11.409	7.522	7.596	9.41	10.087	12.171	14.04	9.557	7.82	7.426
895	7.191	3.288	5.097	6.667	5.655	6.208	2.923	8.037	3.724	3.942	11.88	7.308	7.348	9.703	10.029	12.181	14.051	8.982	7.005	7.051
900	7.359	3.347	5.088	6.613	5.626	6.082	2.837	7.867	3.732	4.042	11.74	7.379	7.451	9.574	9.953	11.917	13.694	9.832	7.75	7.598
905	7.165	3.265	5.337	6.498	5.499	6.038	2.954	7.899	3.831	3.827	11.549	7.352	7.381	9.879	10.274	11.886	14.17	9.729	7.753	7.956
910	7.047	3.231	5.306	6.677	5.524	5.959	2.893	8.051	3.613	3.882	11.766	7.266	7.514	9.581	10.511	12.227	13.909	9.506	7.835	7.3
915	7.003	3.231	5.372	6.477	5.581	6.091	2.964	7.69	3.86	3.72	11.552	6.927	7.504	9.285	9.993	11.712	14.15	9.254	8.097	7.592
920	7.022	3.241	5.132	6.509	5.529	6.039	2.936	7.667	3.63	3.817	11.599	7.38	7.494	9.619	10.444	11.886	13.529	10.072	7.743	7.449
925	7.131	3.243	4.995	6.487	5.531	6.163	2.884	8.048	3.599	3.873	11.795	7.278	7.598	9.78	9.948	12.043	14.16	8.954	7.83	7.517
930	6.854	3.245	5.205	6.312	5.469	5.951	2.865	7.949	3.51	3.81	11.465	7.211	7.146	9.673	9.914	11.852	14.038	9.926	7.389	7.422
935	6.911	3.156	4.962	6.255	5.417	6.208	2.823	7.755	3.592	3.845	11.646	7.163	7.667	9.509	10.11	11.835	14.231	9.366	7.646	7.395
940	7.045	3.337	5.085	6.333	5.659	6.084	2.83	7.894	3.731	3.85	11.319	7.232	7.437	9.665	10.143	11.694	13.866	9.796	7.606	7.369
945	6.818	3.07	5.022	6.523	5.681	6.016	2.984	7.697	3.707	3.851	11.42	7.075	7.594	9.525	10.083	11.72	13.694	9.405	7.646	7.45
950	6.831	3.253	4.955	6.412	5.648	5.874	2.959	7.781	3.73	3.861	11.543	7.3	7.812	9.505	9.903	11.98	13.887	9.633	7.77	7.157
955	6.847	3.018	5.384	6.279	5.6	5.979	2.66	7.624	3.6	3.663	11.285	7.377	7.166	9.607	10.004	11.959	13.986	9.767	7.57	7.626
960	7.014	3.047	5.104	6.464	5.595	5.905	2.868	7.837	3.547	3.805	11.445	7.525	7.557	9.571	10.39	11.627	13.929	9.101	7.771	7.136
965	6.748	3.118	5.149	6.365	5.636	6.183	2.877	7.925	3.495	3.86	11.451	7.292	7.781	9.707	9.896	12.071	13.729	9.397	7.777	6.935
970	6.926	3.084	5.032	6.318	5.661	5.947	2.884	7.904	3.604	0.906	11.571	7.29	7.531	9.797	10.032	11.971	13.995	9.659	7.91	7.598
975	6.76	2.981	5.102	6.412	5.629	6.109	2.918	7.67	3.866	2.549	11.161	7.281	7.304	9.167	10.231	11.84	13.646	9.021	7.811	7.349
980	6.626	3.092	5.121	6.503	5.643	6.01	2.915	7.819	3.597	3.657	11.358	7.28	7.081	9.545	9.98	12.206	13.94	9.348	7.908	7.643
985	6.656	3.037	5.202	6.147	5.562	5.89	2.813	7.655	3.5	3.86	11.549	7.248	7.744	9.753	9.993	12.118	13.965	9.678	7.645	7.754
990	6.706	3.089	4.925	6.44	5.501	5.812	2.81	7.722	3.441	3.556	11.407	7.209	7.528	9.361	10.16	11.922	13.883	9.194	8.244	7.362
995	6.86	3.168	5.034	6.305	5.634	5.851	2.84	7.524	3.441	3.696	11.615	7.391	7.719	9.476	9.929	11.936	14.06	9.542	7.669	7.604
1000	6.733	3.045	4.963	6.158	5.495	6	2.801	7.604	3.647	3.672	11.455	7.526	7.52	9.742	10.061	11.938	14.306	9.2	7.387	7.359
1005	6.649	2.923	5.075	6.249	5.487	5.856	2.919	7.525	3.383	3.606	11.177	6.901	7.494	9.163	9.995	12.127	14.11	9.185	7.669	7.666
1010	6.464	2.904	4.944	6.146	5.357	5.701	2.732	7.695	3.364	3.456	11.382	7.384	7.678	9.429	9.833	11.949	13.93	9.71	8.164	7.405
1015	6.615	2.984	4.819	5.98	5.416	5.837	2.805	7.558	3.612	2.856	11.519	7.422	7.601	9.551	9.979	12.009	13.776	9.748	7.627	7.438
1020	6.642	2.92	5.031	6.162	5.415	5.919	2.782	7.449	3.558	3.403	11.405	7.284	7.565	9.413	10.033	12.055	13.901	9.108	7.979	7.451
1025	6.747	2.767	5.007	6.118	5.523	5.947	2.77	7.584	3.595	3.617	11.41	7.323	7.459	9.566	9.573	11.64	13.909	9.061	7.743	7.523
1030	6.655	2.818	5.077	5.94	5.603	5.772	2.817	7.894	3.392	3.491	11.339	7.215	7.738	9.311	9.568	12.09	13.619	9.124	7.848	7.448
1035	6.606	2.822	4.955	5.97	5.513	5.906	2.693	7.616	3.55	3.6	11.468	7.273	7.647	9.643	10.035	12.279	14.036	8.989	8.006	7.594
1040	6.602	2.887	4.887	5.998	5.321	5.711	2.625	7.531	3.368	3.36	11.574	7.696	7.808	9.361	9.737	12.151	13.906	8.959	7.438	7.379
1045	6.659	2.843	4.866	5.969	5.452	5.77	2.675	7.639	3.489	3.429	11.696	7.406	7.683	9.52	9.817	11.702	13.794	9.106	7.895	7.631
1050	6.506	2.819	5.028	6.07	5.451	5.89	2.808	7.558	3.619	2.661	11.47	7.189	7.657	9.447	10.281	12.029	13.918	9.41	7.93	7.315
1055	6.442	2.707	5.023	6.061	5.36	5.804	2.555	7.755	3.408	3.529	11.497	7.473	7.788	9.416	10.042	11.708	14.006	9.472	7.45	7.718
1060	6.465	2.857	4.824	5.846	5.486	5.747	2.747	7.625	3.423	3.457	11.443	7.217	7.755	9.335	9.81	11.807	13.546	9.28	7.395	7.659
1065	6.684	2.913	4.894	5.873	5.415	5.782	2.673	7.365	3.376	2.49	11.708	7.496	7.501	9.543	9.537	11.624	14.305	9.472	7.569	7.531
1070	6.309	2.814	5.316	5.86	5.316	5.669	2.618	7.515	3.324	2.38	11.742	7.336	7.552	9.545	9.773	11.846	14.165	9.5	8.141	7.672
1075	6.522	2.864	4.973	6.023	5.481	5.739	2.586	7.431	3.387	3.143	11.511	7.162	7.263	9.438	10.112	11.704	14.135	9.454	7.684	7.479
1080	6.52	2.718	5.057	5.948	5.404	5.674	2.59	7.653	3.422	2.574	11.516	7.486	7.475	9.451	9.527	12.053	13.647	9.493	7.603	7.484
1085	6.443	2.798	4.929	5.774	5.46	5.655	2.564	7.448	3.351	3.312	11.129	7.178	7.807	9.557	10.03	12.026	14.016	9.374	7.434	7.379
1090	6.364	2.681	4.91	5.93	5.433	5.481	2.589	7.59	3.338	3.068	11.494	7.4	7.738	9.517	9.82	11.81	14.222	9.333	7.662	7.395
1095	6.444	2.77	4.78	5.866	5.513	5.725	2.457	7.486	3.461	3.042	11.505	7.344	7.726	9.651	9.798	11.772	13.559	9.628	7.781	7.501
1100	6.288	2.596	4.949	5.816	5.521	5.693	2.393	7.498	3.294	2.954	11.459	7.548	7.672	9.756	10.1	11.97	14.182	9.153	7.804	7.567
1105	6.396	2.703	5.021	5.811	5.64	5.711	2.422	7.555	3.163		11.512	7.51	7.905	9.824	10.085	12.625	13.916	9.217	7.513	7.444
1110	6.173	2.63	4.925	5.824	5.478	5.48	2.562		3.082		11.553	7.103	7.931	9.392	10.158	11.906	13.895	9.449	7.643	7.536
1115		2.738	4.763			5.535	2.487		3.107		11.469		7.533	9.647	9.566	12.099	14.08	9.203	8.079	7.626
1120																	14.463		7.838

## Sheet: Summary table
Depolymerisation rates for individual microtubules - um/min
WT	T537E
2.88006	0.118812
3.57774	0.118602
3.59892	0.0168864
3.1518	0.0235566
3.39906	0.009954
3.4782	0.158724
3.6132	0.12552
3.45456	0.0128868
3.69342	0.083526
3.58356	0.110568
2.43864	0.00593
2.57052	0.0198558
3.00084	0.111168
2.84784	0.15282
2.49426	0.076776
3.3612	0.0347196
1.98672	0.10503
2.15448	0.0404694
2.72046	0.0243546
2.77854	0.0144732
