# Supplementary material for: A Cdk1 phosphomimic mutant of MCAK impairs microtubule end recognition
Source: PeerJ. 2017 Dec 6;5:e4034. doi: 10.7717/peerj.4034 (PMC5723132; doi:10.7717/peerj.4034)
Supplement: Supplemental Information 3 — Numeric data file listing the microtubule lattice and microtubule end residence times plotted in Fig. 2B and Fig. S1. [file peerj-05-4034-s006.xlsx]

## Sheet: Sheet1
End residence times - s				Lattice residence times -s
WT	T537E			WT	T537E
1.89	0.27			0.135	0.274
2.97	0.675			0.135	0.548
1.89	1.08			0.81	0.137
0.945	0.27			0.135	1.37
0.675	2.16			0.81	0.137
1.215	0.54			0.27	0.137
1.755	0.54			0.675	0.548
1.35	0.405			0.405	0.411
0.675	0.54			0.135	0.822
0.81	0.945			0.27	0.822
1.215	0.81			0.27	0.137
3.24	0.54			0.54	0.137
0.27	0.54			0.27	0.685
0.27	0.54			0.81	0.548
0.945	0.945			0.27	0.137
1.89	0.405			0.135	0.274
1.35	0.405			0.27	0.411
0.54	0.54			0.135	0.959
6.21	0.81			0.81	1.507
0.81	0.405			0.27	0.274
0.945	0.54			0.405	0.411
1.215	0.405			0.135	1.918
3.375	0.945			0.27	0.137
0.54	0.405			0.405	0.274
3.915	0.945			0.27	0.274
0.405	0.405			0.135	0.411
0.27	0.945			0.27	0.959
0.54	0.27			0.405	1.096
0.945	0.27			0.27	0.274
4.995	0.81			1.08	0.411
0.54	0.54			0.405	0.137
3.915	0.27			0.405	0.137
1.485	0.54			0.405	1.507
1.755	0.27			0.54	0.548
1.755	0.54			0.675	0.137
0.81	0.405			0.405	1.096
1.89	0.27			0.135	0.274
0.675	0.81			0.27	0.137
0.675	0.675			0.27	0.685
5.265	0.405			0.81	0.959
0.405	0.405			0.27	0.274
1.89	0.675			0.27	0.548
1.62	0.27			0.27	0.959
2.43	0.81			0.135	0.137
2.295	0.675			0.81	0.137
4.86	0.81			0.405	0.411
1.755	0.54			0.27	0.137
1.08	0.405			0.675	0.137
1.215	1.08			0.135	0.411
1.485	0.405			0.405	0.137
3.24	0.675			0.135	0.548
1.35	0.81			0.945	0.548
1.62	0.81			0.54	0.411
0.54	0.54			0.135	0.274
1.35	1.485			0.54	0.274
0.54	0.54			0.945	0.137
0.945	0.27			0.135	0.137
2.025	0.54			0.405	0.137
1.485	0.81			0.27	0.274
4.86	0.405			0.54	0.137
4.32	0.54			0.135	0.959
1.62	0.405			0.135	0.548
0.405	0.54			0.135	0.548
1.08	0.675			0.405	0.411
2.7	1.08			0.27	0.959
2.16	1.215			0.945	0.137
1.35	0.675			0.405	0.411
0.27	0.675			0.27	0.548
0.81	1.08			0.81	0.274
0.54	0.675			0.54	0.685
0.27	0.675			0.405	0.137
1.485	1.08			1.62	0.548
1.215	0.54			0.135	1.507
0.405	0.405			0.81	0.411
0.675	0.27			0.27	0.137
1.485	0.405			0.675	0.137
0.54	0.54			0.135	0.548
1.755	0.54			0.27	0.137
0.405	0.81			0.405	0.274
2.565	1.215			0.675	0.548
14.58	0.405			0.135	0.548
1.35	0.675			0.27	0.548
2.16	1.215			0.27	0.274
1.755	0.54			0.135	0.137
3.51	0.405			0.27	0.137
2.025	0.27			0.135	0.411
1.62	0.27			0.27	0.959
6.21	0.27			0.945	0.685
0.675	0.54			0.27	0.548
0.945	0.54			0.135	0.274
0.675	0.54			0.27	0.137
0.675	0.405			0.135	0.137
0.945	0.675			0.135	0.411
1.215	0.81			0.135	0.137
0.945	0.405			0.27	0.274
0.405	0.945			0.135	0.274
0.405	0.54			0.405	0.137
0.54	0.81			0.135	0.274
0.27	0.54			0.27	1.37
3.105	0.54			0.675	0.411
0.675	0.81			0.54	0.411
5.535	1.08			0.135	0.274
5.67	1.215			0.135	0.274
0.81	1.755			0.135	0.137
2.295	0.675			0.27	0.137
8.235	0.675			0.405	0.274
1.485	0.675			1.08	0.274
0.405	0.405			0.405	0.137
0.405	0.675			0.405	0.274
1.485	0.27			0.405	0.959
3.375	0.405			0.27	0.274
1.35	0.405			0.135	0.274
3.78	0.54			0.27	0.548
0.54	0.945			0.54	0.274
1.89	0.675			0.405	0.411
0.675	0.405			0.675	0.822
0.405	0.405			0.135	0.822
0.81	0.405			0.27	0.274
0.405	0.405			0.405	0.274
0.405	0.54			1.62	0.411
1.89	0.81			0.405	0.274
0.675	1.215			0.135	2.192
2.835	0.405			0.27	0.274
0.945	0.27			0.81	0.274
0.675	0.675			0.405	0.548
0.675	0.405			0.54	0.137
6.48	0.27			0.135	0.137
1.485	0.405			0.54	0.137
9.315	0.675			0.135	0.548
1.485	0.405			0.54	0.685
1.08	0.405			0.27	0.274
2.025	1.215			0.135	0.137
1.35	0.81			0.405	0.137
1.62	1.485			0.27	0.274
0.54	0.675			0.27	0.137
0.54	1.08			1.215	0.822
3.645	0.54			0.405	0.137
1.215	0.675			0.27	0.548
2.565	0.54			0.135	0.274
0.81	0.54			0.135	0.274
1.35	0.27			0.675	2.329
0.81	0.54			0.405	0.274
1.08	0.27			0.54	0.137
0.27	0.945			0.54	0.274
2.295	0.405			0.27	0.137
0.54	0.54			0.135	0.548
0.945	0.675			0.405	0.274
0.675	0.54			0.675	0.137
0.405	0.405			0.27	0.137
0.405	0.675			0.405	0.959
1.35	0.81			0.81	0.548
0.81	0.405			0.27	0.137
0.405	0.81			0.675	0.274
7.02	0.405			0.81	0.137
4.995	0.81			0.54	0.137
2.025	0.54			0.81	0.548
1.485	0.405			0.405	0.548
0.54	0.405			0.135	0.274
0.945	0.405			1.755	0.274
0.405	0.27			0.27	1.37
1.35	0.54			1.08	0.274
3.24	0.27			0.945	0.411
2.565	1.35			0.945	0.137
0.945	0.945			0.135	0.274
0.54	0.945			0.27	0.274
0.54	0.81			0.54	0.274
0.945	1.08			0.27	0.411
1.755	0.54			0.675	2.192
1.08	0.54			0.675	0.274
1.485	0.54			0.81	0.274
0.945	0.945			0.135	0.822
2.835	0.54			0.945	0.137
0.27	0.675			0.405	0.411
9.18	0.675			0.27	0.411
1.35	0.81			0.27	0.137
0.54	0.675			0.405	0.274
6.48	0.675			0.135	0.137
0.27	1.215			0.27	0.274
1.35	0.405			0.135	0.274
0.81	0.675			0.135	0.822
0.675	0.405			0.135	0.411
0.27	0.54			0.27	0.411
1.62	0.27			0.135	0.137
0.675	0.675			1.08	0.137
0.405	0.54			1.485	0.411
0.27	0.405			0.54	0.274
2.565	0.81			0.81	0.274
2.16	0.405			0.675	0.411
4.185	0.54			0.135	0.274
4.59	1.08			0.405	0.274
2.565	0.675			0.54	0.548
1.08	0.54			1.08	0.274
0.54	0.675			0.135	0.274
0.405	0.81			0.405	0.137
0.675	0.945			0.675	0.274
1.485	0.405			1.485	0.411
0.405	0.405			0.81	0.137
7.83	0.675			0.27	0.548
0.27	0.54			0.675	0.411
6.345	0.405			0.135	0.411
0.27	0.675			0.54	0.548
0.54	0.27			0.27	0.685
2.97	0.54			0.405	0.411
0.54	0.405			0.405	0.411
1.08	0.675			0.405	0.274
4.32	0.405			0.405	0.137
6.615	0.27			0.675	0.411
0.54	0.81			1.08	0.137
4.185	0.675			0.135	0.274
0.945	0.54			0.27	0.274
2.835	0.54			0.27	0.411
1.215	0.675			0.27	0.137
6.885	0.945			0.405	0.411
7.155	0.405			0.135	0.274
3.78	1.08			0.27	0.274
0.675	0.54			0.405	0.274
4.32	1.08			0.135	0.137
10.26	1.215			0.405	0.548
2.565	0.54			0.135	0.274
0.945	0.405			0.945	0.137
2.295	0.81			0.54	0.548
3.375	0.54			0.675	0.274
2.565	0.54			0.135	0.411
0.54	0.54			0.27	0.137
3.105	0.54			0.81	0.274
7.56	0.675			0.135	0.411
1.08	0.405			0.135	0.411
0.945	0.27			0.135	0.137
3.51	0.54			1.89	0.274
4.995	1.08			0.27	0.411
2.835	0.405			0.405	0.411
2.7	0.54			0.54	0.274
4.32	0.54			0.27	0.137
2.7	0.945			0.135	1.507
2.16	1.215			0.405	0.137
3.375	0.405			0.675	0.274
4.455	0.54			0.27	0.274
2.97	0.675			0.405	0.137
6.615	0.54			0.54	0.137
0.405	0.405			0.27	0.137
0.54	0.54			0.27	0.685
0.27	0.675			0.27	0.548
0.54				0.27	0.137
0.405				0.405	0.137
2.97				0.54	0.137
0.405				0.27	0.274
6.345				0.675	0.137
0.81				0.405	0.959
0.405				0.54	0.274
0.54				0.135	0.137
0.945				0.405	0.274
0.54				0.27	0.274
1.215				0.27	0.137
0.675				0.405	0.274
0.405				0.135	0.411
0.54				0.405	0.137
0.945				0.405	0.274
0.405				0.405	0.137
0.405				0.405	0.274
0.27				0.27	0.411
0.54				0.405	0.137
0.54				0.27	0.137
6.48				0.54	0.411
0.945				1.08	0.411
1.755				1.215	0.411
1.215				0.135	0.137
1.62				0.135	0.411
6.345				0.27	0.274
0.81				0.675	0.274
0.405				0.54	0.548
0.945				0.27	0.411
4.725				0.27	0.137
0.81				0.54	0.137
0.81				0.27	0.274
0.405				0.54	0.137
0.27				1.35	0.137
0.54				0.27	0.411
1.215				1.08	0.548
4.59				0.27	0.137
3.105				0.675	0.411
0.81				0.27	0.274
0.81				0.54	0.137
7.83				0.135	0.137
1.89				0.54	0.274
0.54				0.675	1.507
0.405				0.405	0.137
0.675				0.54	0.274
0.405				0.27	0.548
0.945				0.405	0.137
				0.27	0.137
				0.675	0.137
				0.27	0.822
				0.27	0.137
				0.27	0.274
				0.405	0.685
				0.27	0.274
				0.27	0.274
				0.405	0.274
				0.675	0.274
				1.35	0.411
				0.54	0.411
				1.08	0.411
				0.405	0.411
				0.27	0.411
				0.54	1.233
				0.54	0.822
				0.405	0.274
				0.675	0.548
				1.08	0.137
				0.405	0.274
				0.27	0.548
				0.27	0.411
				0.27	0.411
				0.405	0.137
				0.27	0.411
				0.135	0.274
				0.405	0.274
				0.135	0.274
				0.27	0.685
				0.135	0.274
				0.675	0.274
				0.405	0.137
				0.27	0.274
				0.54	0.274
				1.215	0.137
				0.405	0.137
				0.405	0.274
				0.135	0.822
				0.405	0.411
				0.54	1.096
				0.675	1.096
				0.405	0.411
				0.405	0.548
				0.405	0.411
				0.135	0.137
				0.54	0.274
				0.945	0.274
				0.27	0.548
				0.27	0.959
				0.135	0.137
				0.81	0.685
				0.81	0.822
				0.405	0.274
				1.08	0.548
				0.54	0.137
				0.54	0.822
				0.27	1.233
				0.27	0.822
				0.81	0.685
				1.62	0.548
				0.405	0.137
				0.27	0.411
				1.215	0.548
				0.405	0.137
				0.675	0.411
				0.27	1.233
				0.945	0.685
				0.405	0.274
				0.135	0.822
				0.405	0.822
				1.215	0.274
				0.675	0.137
				0.27	0.959
				0.81	0.411
				0.54	0.137
				0.27	0.548
				0.675	0.411
				0.405	0.822
				1.215	0.685
				1.215	1.096
				0.27	1.37
				0.27	0.411
				1.08	0.137
				0.675	0.137
				0.405	0.137
				0.405	0.411
				0.945	0.548
				0.405	0.548
				0.405	0.411
				0.675	0.137
				0.81	0.274
				0.81	0.137
				0.405	0.274
				1.215	0.137
				0.81	0.137
				0.675	0.137
				1.35	0.137
				0.675	0.137
				0.135	0.137
				0.405	0.137
				1.755	1.918
				0.27	0.411
				0.405	1.096
				0.135	0.137
				0.27	0.274
				0.27	0.822
				0.945	0.685
				0.675	0.411
				0.405	0.274
				0.27	0.137
				0.405	0.137
				0.405	0.685
				0.27	0.411
				0.27	0.548
				0.54	1.096
				0.135	0.274
				0.54	0.137
				0.54	0.411
				0.405	0.822
				0.54	2.055
				0.405	0.137
				0.405	1.507
				0.27	0.685
				0.675	0.685
				0.405	0.548
				0.27	0.959
				0.54	0.274
				0.675	0.137
				0.27	1.096
				0.27	0.411
				0.54	0.411
				2.025	0.137
				0.27	0.137
				0.27	0.137
				0.675	0.137
				0.54	0.137
				0.405	0.548
				0.54	0.685
				0.405	1.644
				0.54	0.137
				0.54	0.137
				0.405	0.274
				0.405	0.274
				0.27	0.274
				0.27	0.137
				0.27	0.685
				0.27	0.137
				0.675	0.548
				0.405	0.274
				0.81	0.274
				0.135	0.274
				0.27	0.411
				0.405	0.137
				0.27	0.137
				0.405	0.411
				0.27	0.274
				0.27	0.685
				0.675	0.274
				0.27	0.274
				0.405	0.274
				0.27	0.274
				0.27	0.274
				0.27	0.685
				0.675	0.411
				0.54	0.548
				0.27	0.959
				0.405	0.685
				0.27	0.137
				0.54	0.274
				0.405	0.274
				0.405	1.096
				1.62	0.137
				0.945	0.274
				1.08	0.411
				0.54	0.137
				0.81	0.411
				0.405	0.411
				0.54	0.411
				0.135	0.274
				0.675	0.137
				0.405	0.137
				0.405	0.137
				1.08	0.274
				0.405	0.411
				0.27	0.411
				0.405	0.274
				0.405	0.685
				0.27	0.548
				0.405	0.548
				0.405	0.274
				0.54	0.137
				0.27	0.137
				0.54	0.274
				1.215	0.959
				0.54	0.274
				0.27	0.137
				0.675	0.137
				0.27	0.137
				0.405	0.274
				0.135	0.411
				0.27	0.137
				0.135	0.548
				1.89	0.822
				1.35	0.274
				0.81	0.548
				0.54	0.137
				0.54	0.137
				0.405	0.548
				0.54	0.548
				0.27	1.096
				0.54	0.274
				0.945	0.274
				0.27	0.411
				0.135	0.685
				1.485	0.137
				0.27	0.548
				0.405	0.822
				0.27	0.137
				0.27	0.411
				0.405	0.822
				0.81	0.411
				0.27	0.548
				0.135	0.274
				0.135	0.274
				1.35	0.685
				0.405	0.137
				0.27	0.274
				0.81	1.37
				0.27	0.411
				1.485	0.274
				1.89	0.137
				0.945	0.274
				0.81	0.137
				2.025	0.411
				0.945	0.411
				1.485	0.411
					0.548
					0.274
					0.137
					0.411
					0.548
					0.274
					0.274
					0.274
					0.685
					0.274
					0.548
					0.137
					0.822
					0.411
					0.137
					0.137
					0.274
					0.548
					0.137
					0.137
					0.137
					1.507
					0.548
					1.096
					0.137
					0.274
					0.274
					0.137
					0.685
					0.822
					0.274
					0.137
					0.822
					0.274
					0.685
					0.685
					0.137
					0.137
					0.137
					0.137
					0.274
					0.548
					0.411
					0.411
					0.274
					0.411
					0.411
					0.548
					0.274
					0.548
					0.685
					0.685
					0.822
					0.274
					0.411
					0.274
					0.685
					0.274
					0.137
					0.411
					0.411
					0.137
					0.137
					0.411
					0.274
					0.137
					0.137
					0.548
					0.274
					0.548
					1.507
					0.548
					0.685
					1.096
					0.274
					0.274
					0.685
					0.274
					0.411
					0.411
					0.959
					0.137
					1.096
					0.822
					0.822
					0.137
					0.274
					0.137
					0.137
					0.137
					0.274
					1.507
					0.137
					0.411
					0.137
					0.274
