# Supplementary material for: A Cdk1 phosphomimic mutant of MCAK impairs microtubule end recognition
Source: PeerJ. 2017 Dec 6;5:e4034. doi: 10.7717/peerj.4034 (PMC5723132; doi:10.7717/peerj.4034)
Supplement: Supplemental Information 4 — Raw numerical data for time v. fluorescence intensity traces plotted in Figs. 2C and 2D and Fig S2. [file peerj-05-4034-s007.xlsx]

## Sheet: Sheet1
mant ADP dissociation measured by Stopped flow
In solution											With tubulin											With microtubules
Time/s	WT			Av		T537E			Av		WT			Av		T537E			Av		Time/s	WT			Av		T537E			Av
0.1	1	1	1	1		1	1	1	1		1	1	1	1		1	1	1	1		0.025	1	1	1	1		1	1	1	1
0.2	0.980285	0.999731	0.995109	0.991708		1.00009	1.02412	0.993452	1.00589		1.02188	1.01432	0.993556	1.00919		1.01684	1.00221	1.01229	1.01009		0.05	0.869215	0.877925	0.900127	0.882422		0.985884	0.985694	1.00956	0.993711
0.3	0.966599	0.989736	0.98592	0.980752		0.991313	1.0113	0.984144	0.995586		1.01434	1.00407	0.979388	0.998346		1.00873	0.992443	1.00431	1.00142		0.075	1.10768	0.787259	0.819072	0.904671		0.975246	0.977383	1.00535	0.985991
0.4	0.953659	0.978808	0.976246	0.969571		0.981441	0.99729	0.973993	0.984241		1.00611	0.991134	0.964695	0.986168		0.998946	0.980769	0.993077	0.990488		0.1	0.757067	0.718043	0.753921	0.74301		0.965721	0.96328	0.995381	0.974794
0.5	0.942886	0.967394	0.966463	0.958914		0.972147	0.982885	0.963268	0.972767		0.995508	0.976455	0.950462	0.972842		0.989238	0.968756	0.981377	0.979309		0.125	0.69045	0.663674	0.701972	0.685365		0.953188	0.951619	0.983906	0.962904
0.6	0.932114	0.955737	0.956079	0.947977		0.962196	0.968037	0.952052	0.960762		0.983859	0.961877	0.936599	0.959376		0.978679	0.956172	0.969192	0.967498		0.15	0.651911	0.620733	0.657653	0.643432		0.942731	0.94055	0.971925	0.951735
0.7	0.919241	0.94397	0.946037	0.936416		0.951736	0.953255	0.941726	0.948906		0.971778	0.948357	0.923382	0.946386		0.968526	0.944035	0.956925	0.955951		0.175	0.619343	0.584363	0.621707	0.608471		0.933323	0.930609	0.95905	0.940994
0.8	0.908198	0.932271	0.936121	0.92553		0.941717	0.938643	0.931353	0.937238		0.961277	0.934667	0.910257	0.93383		0.958838	0.932325	0.945002	0.944818		0.2	0.590874	0.553294	0.590752	0.578306		0.922754	0.920649	0.946043	0.929815
0.9	0.898035	0.921335	0.926029	0.915133		0.931522	0.923945	0.920572	0.925347		0.951207	0.92309	0.897063	0.922123		0.948644	0.919919	0.932918	0.933219		0.225	0.566559	0.527558	0.563409	0.552509		0.913413	0.911449	0.932962	0.919275
1	0.88916	0.909971	0.91628	0.905137		0.920357	0.909728	0.910356	0.913481		0.94085	0.91119	0.884923	0.910591		0.938754	0.908709	0.920955	0.922189		0.25	0.544892	0.504976	0.53963	0.529833		0.904417	0.902723	0.919593	0.908911
1.1	0.879065	0.898859	0.906263	0.894729		0.910377	0.896104	0.900419	0.9023		0.932051	0.900312	0.872886	0.899912		0.92935	0.897391	0.90972	0.911508		0.275	0.525424	0.485282	0.518145	0.509617		0.896722	0.894517	0.906533	0.899257
1.2	0.870528	0.888494	0.896297	0.885106		0.900427	0.882225	0.890462	0.891038		0.92317	0.889417	0.860426	0.889054		0.920554	0.885966	0.898628	0.901027		0.3	0.507793	0.467995	0.499063	0.491617		0.886181	0.885524	0.893691	0.888465
1.3	0.860569	0.877861	0.886757	0.875062		0.890016	0.869175	0.88158	0.880257		0.913735	0.878608	0.848344	0.878198		0.911576	0.874791	0.887252	0.890488		0.325	0.493207	0.452817	0.48204	0.476021		0.878874	0.877935	0.88068	0.879163
1.4	0.851829	0.867588	0.877116	0.865511		0.88036	0.856717	0.872217	0.869764		0.904732	0.870356	0.836188	0.868343		0.902781	0.864346	0.876402	0.880439		0.35	0.478719	0.439345	0.466605	0.461556		0.870558	0.869695	0.867932	0.869395
1.5	0.843293	0.857895	0.867568	0.856252		0.870879	0.844014	0.861733	0.858875		0.897102	0.860826	0.824894	0.858746		0.894329	0.853563	0.865734	0.870436		0.375	0.465004	0.426976	0.452528	0.448169		0.862612	0.861582	0.855175	0.85979
1.6	0.835772	0.847773	0.857384	0.846976		0.861859	0.831735	0.852582	0.848726		0.889185	0.851261	0.813645	0.849068		0.886425	0.842584	0.855026	0.860523		0.4	0.453412	0.415922	0.439836	0.43639		0.855906	0.854189	0.843041	0.851045
1.7	0.82561	0.838105	0.847618	0.837111		0.852408	0.820237	0.843589	0.838745		0.881227	0.844032	0.803044	0.840432		0.877711	0.833102	0.845027	0.85112		0.425	0.441733	0.40573	0.427982	0.425148		0.847733	0.847517	0.830898	0.842049
1.8	0.817412	0.828159	0.838204	0.827925		0.843604	0.808626	0.834318	0.828849		0.873885	0.836104	0.791537	0.831409		0.87005	0.822835	0.834237	0.841518		0.45	0.433031	0.396205	0.416429	0.415222		0.839589	0.839623	0.819244	0.832819
1.9	0.809824	0.819112	0.829215	0.819384		0.835328	0.796902	0.825501	0.819244		0.865804	0.828687	0.7813	0.822799		0.862004	0.813175	0.824116	0.832225		0.475	0.422429	0.388057	0.406861	0.405782		0.833522	0.832279	0.808167	0.824656
2	0.802236	0.809737	0.819985	0.810653		0.826563	0.785724	0.816008	0.809432		0.858564	0.820657	0.771471	0.814364		0.853776	0.803265	0.814724	0.823016		0.5	0.415207	0.380034	0.397208	0.397483		0.826073	0.825182	0.796744	0.816
2.1	0.79248	0.800883	0.811181	0.801515		0.818522	0.775158	0.807293	0.800324		0.851467	0.813258	0.761109	0.806005		0.845628	0.793284	0.804684	0.8136		0.525	0.406276	0.373129	0.388379	0.389261		0.819318	0.818507	0.785735	0.807853
2.2	0.784553	0.791685	0.802811	0.793016		0.810129	0.764347	0.798513	0.790996		0.846135	0.805227	0.751325	0.798145		0.837927	0.784123	0.795069	0.804759		0.55	0.398635	0.365946	0.37974	0.38144		0.811619	0.812148	0.774739	0.799502
2.3	0.777439	0.783132	0.794199	0.784923		0.801549	0.753997	0.790094	0.78188		0.838874	0.798544	0.74171	0.790255		0.830834	0.775888	0.785717	0.796532		0.575	0.392592	0.360258	0.372126	0.374992		0.805431	0.805112	0.764082	0.791542
2.4	0.770054	0.775084	0.786264	0.777134		0.794008	0.743618	0.781795	0.773141		0.831655	0.791895	0.732041	0.782369		0.823355	0.767387	0.776851	0.78824		0.6	0.385172	0.354275	0.364651	0.368033		0.798342	0.798734	0.753801	0.783626
2.5	0.762534	0.7668	0.777912	0.769082		0.786016	0.734096	0.773163	0.764425		0.824415	0.784717	0.722715	0.774413		0.815938	0.758422	0.767054	0.779503		0.625	0.379129	0.348684	0.357424	0.361746		0.791475	0.79192	0.744035	0.77581
2.6	0.754878	0.758701	0.769107	0.760895		0.777927	0.724423	0.765661	0.756004		0.817913	0.779022	0.713665	0.767294		0.808804	0.749884	0.758208	0.771314		0.65	0.37268	0.34378	0.35131	0.355923		0.786388	0.785794	0.733714	0.768632
2.7	0.7479	0.751223	0.76083	0.753318		0.770777	0.71444	0.757835	0.747684		0.812089	0.772765	0.704709	0.760209		0.802298	0.741329	0.749848	0.763474		0.675	0.366671	0.338402	0.345462	0.350178		0.77887	0.779601	0.723928	0.7608
2.8	0.738821	0.743796	0.753255	0.745291		0.76305	0.704608	0.749713	0.739124		0.805525	0.766559	0.695163	0.752715		0.795185	0.73297	0.741326	0.75546		0.7	0.361827	0.333517	0.339196	0.344847		0.772723	0.774134	0.714742	0.753866
2.9	0.731843	0.73636	0.745337	0.737847		0.755627	0.695189	0.741285	0.7307		0.79927	0.759501	0.686795	0.745429		0.78878	0.724824	0.732906	0.747782		0.725	0.356504	0.329439	0.333773	0.339905		0.766719	0.767989	0.705289	0.746666
3	0.724864	0.72889	0.737628	0.730461		0.7488	0.685902	0.733885	0.722862		0.793527	0.752408	0.677405	0.737919		0.781586	0.716055	0.724424	0.739606		0.75	0.352109	0.325525	0.328768	0.335468		0.761671	0.761811	0.696605	0.740029
3.1	0.718293	0.722092	0.729944	0.723443		0.741739	0.677011	0.726133	0.714961		0.786164	0.74639	0.669245	0.730748		0.775607	0.709069	0.716186	0.732541		0.775	0.347035	0.320854	0.323475	0.330455		0.753958	0.756577	0.687622	0.732719
3.2	0.709892	0.714992	0.72241	0.715765		0.734648	0.668514	0.71914	0.707434		0.780032	0.74044	0.660769	0.723851		0.768656	0.700798	0.707745	0.724637		0.8	0.342979	0.316988	0.318979	0.326315		0.749683	0.750489	0.678835	0.726336
3.3	0.703726	0.708211	0.714526	0.708821		0.727871	0.660601	0.71187	0.700114		0.77353	0.735393	0.652538	0.71725		0.762616	0.693277	0.700012	0.71752		0.825	0.33879	0.313327	0.314409	0.322175		0.742721	0.744879	0.670544	0.719381
3.4	0.69729	0.701496	0.706641	0.701809		0.72033	0.652575	0.704599	0.692501		0.767049	0.729681	0.644184	0.710377		0.756131	0.685381	0.692138	0.710081		0.85	0.33459	0.30953	0.310137	0.318086		0.736247	0.738505	0.66218	0.712311
3.5	0.691057	0.695361	0.699685	0.695368		0.713249	0.644417	0.697144	0.684937		0.761019	0.725044	0.636204	0.704149		0.749321	0.678198	0.684507	0.702874		0.875	0.331453	0.30699	0.306284	0.314909		0.731818	0.733809	0.654131	0.706586
3.6	0.684553	0.689193	0.692461	0.688736		0.706207	0.636683	0.689799	0.677563		0.755215	0.719571	0.628261	0.697704		0.743038	0.67	0.677017	0.695512		0.9	0.327127	0.303482	0.301755	0.310788		0.727537	0.728429	0.645958	0.700641
3.7	0.677642	0.683276	0.685354	0.682091		0.699489	0.628854	0.682751	0.670365		0.748713	0.713911	0.620581	0.691082		0.73706	0.663031	0.669953	0.688828		0.925	0.323551	0.300434	0.297747	0.307244		0.721141	0.722186	0.638207	0.693845
3.8	0.671003	0.676671	0.678347	0.67534		0.692663	0.621158	0.675295	0.663038		0.743524	0.708796	0.612794	0.685		0.730392	0.655153	0.661653	0.681201		0.95	0.320267	0.297397	0.295273	0.304312		0.715364	0.717366	0.630835	0.687855
3.9	0.665583	0.671207	0.671424	0.669405		0.685513	0.613828	0.668368	0.655903		0.737063	0.704141	0.605447	0.678863		0.723947	0.647738	0.654225	0.674091		0.975	0.317092	0.294363	0.291154	0.30087		0.71065	0.712994	0.623502	0.682382
4	0.657588	0.66555	0.664434	0.662524		0.679196	0.607091	0.66156	0.649282		0.731157	0.698464	0.598619	0.672711		0.718536	0.640734	0.646371	0.667323		1	0.313879	0.291976	0.287412	0.297756		0.70498	0.707147	0.616175	0.676101
4.1	0.65271	0.659801	0.657561	0.656691		0.672625	0.599498	0.654985	0.642369		0.724142	0.692104	0.591404	0.665856		0.712375	0.634192	0.639002	0.660639		1.025	0.310571	0.289022	0.284028	0.29454		0.699516	0.702244	0.609297	0.670352
4.2	0.645054	0.654313	0.650964	0.65011		0.666082	0.592309	0.648798	0.63573		0.720409	0.68658	0.584511	0.660373		0.706538	0.62758	0.632404	0.654278		1.05	0.30769	0.286459	0.281351	0.291833		0.695569	0.696781	0.601821	0.664723
4.3	0.640515	0.649411	0.644418	0.644781		0.659912	0.58544	0.642241	0.629198		0.715261	0.681295	0.577384	0.654476		0.700499	0.620718	0.625076	0.64753		1.075	0.305275	0.284691	0.278205	0.289391		0.689808	0.692266	0.595196	0.65909
4.4	0.634959	0.644015	0.638105	0.639026		0.654467	0.578186	0.636035	0.622896		0.710626	0.676351	0.57021	0.648833		0.69452	0.614034	0.618659	0.641156		1.1	0.302425	0.281691	0.275541	0.286553		0.686	0.687145	0.588318	0.653821
4.5	0.629404	0.638811	0.631399	0.633205		0.648189	0.571938	0.629469	0.616532		0.704494	0.672259	0.563756	0.643307		0.689169	0.607368	0.611493	0.63475		1.125	0.299517	0.279733	0.271936	0.283728		0.680652	0.682362	0.582023	0.648346
4.6	0.622764	0.633868	0.624853	0.627162		0.642587	0.564778	0.623541	0.610302		0.698669	0.666547	0.55719	0.63726		0.683535	0.600667	0.604652	0.628344		1.15	0.296505	0.277468	0.270296	0.281423		0.675916	0.67776	0.57556	0.643079
4.7	0.617886	0.628639	0.61818	0.621568		0.63673	0.558539	0.616993	0.604088		0.694628	0.661279	0.54989	0.631632		0.677496	0.594518	0.597992	0.622067		1.175	0.294759	0.275115	0.267198	0.279024		0.671699	0.672797	0.569048	0.637848
4.8	0.612669	0.623872	0.612135	0.616225		0.630933	0.552056	0.610668	0.597886		0.689973	0.657017	0.543925	0.626652		0.671396	0.587994	0.591231	0.615602		1.2	0.291643	0.273634	0.265228	0.276835		0.66596	0.667819	0.563197	0.632325
4.9	0.60664	0.619315	0.605806	0.610587		0.625125	0.546082	0.604536	0.591914		0.684209	0.651885	0.537121	0.620743		0.666025	0.582095	0.584571	0.609629		1.225	0.288779	0.271536	0.261848	0.274054		0.660802	0.663361	0.557185	0.627116
5	0.600949	0.614968	0.599778	0.605232		0.619366	0.540013	0.59834	0.585906		0.67941	0.647844	0.530351	0.615514		0.660614	0.575233	0.5786	0.603513		1.25	0.286967	0.269555	0.260012	0.272178		0.656765	0.658413	0.551236	0.622138
5.1	0.595054	0.611166	0.593774	0.599998		0.613588	0.534329	0.592237	0.580051		0.675329	0.642439	0.524529	0.61035		0.65502	0.569672	0.57277	0.597856		1.275	0.285232	0.267557	0.257766	0.270185		0.652461	0.654003	0.545589	0.617351
5.2	0.591531	0.607104	0.587554	0.595396		0.608358	0.528486	0.586976	0.574607		0.670099	0.638262	0.518099	0.605066		0.650318	0.564004	0.566293	0.592238		1.3	0.281467	0.266342	0.255749	0.267853		0.647099	0.649296	0.539853	0.612083
5.3	0.587195	0.602639	0.581483	0.590439		0.602276	0.523245	0.581262	0.568928		0.664171	0.633864	0.512655	0.599849		0.644826	0.557534	0.560949	0.586438		1.325	0.279713	0.264316	0.253869	0.265966		0.642887	0.644532	0.534368	0.607262
5.4	0.581978	0.598459	0.575881	0.585439		0.596694	0.517459	0.575603	0.563252		0.658962	0.628732	0.506751	0.594421		0.639678	0.552686	0.554795	0.581078		1.35	0.27757	0.262965	0.251601	0.264045		0.637546	0.640815	0.528913	0.602424
5.5	0.5771	0.594582	0.570338	0.580673		0.591336	0.511653	0.569703	0.557564		0.65326	0.624162	0.500783	0.589025		0.634389	0.545788	0.548804	0.574982		1.375	0.274683	0.261044	0.249283	0.26167		0.633975	0.636074	0.523553	0.597867
5.6	0.571951	0.590612	0.565564	0.576042		0.585803	0.506309	0.564202	0.552105		0.648276	0.619883	0.494904	0.583973		0.629119	0.540067	0.543095	0.569409		1.4	0.273137	0.259891	0.247587	0.260205		0.630701	0.631995	0.5181	0.593599
5.7	0.566938	0.586919	0.559853	0.571237		0.579976	0.500541	0.559247	0.546588		0.643559	0.61649	0.489772	0.579576		0.624032	0.534025	0.5368	0.563591		1.425	0.272087	0.257979	0.246033	0.258699		0.62623	0.627404	0.512817	0.588817
5.8	0.561585	0.583142	0.554485	0.566404		0.574511	0.494999	0.554496	0.541335		0.638842	0.611955	0.484599	0.574762		0.618621	0.527983	0.531497	0.557985		1.45	0.269689	0.256386	0.244495	0.256857		0.621062	0.623378	0.508301	0.584247
5.9	0.555352	0.57929	0.549694	0.561445		0.569291	0.489391	0.549133	0.535938		0.635478	0.608341	0.478506	0.570343		0.613109	0.522957	0.525424	0.55247		1.475	0.268123	0.255291	0.242192	0.255202		0.616955	0.619036	0.503005	0.579666
6	0.55122	0.575908	0.544536	0.557221		0.56408	0.484244	0.54365	0.530658		0.630638	0.604845	0.473459	0.565904		0.608265	0.517948	0.519837	0.54733		1.5	0.265595	0.253886	0.240388	0.253289		0.614149	0.614672	0.498245	0.575689
6.1	0.545528	0.57203	0.539176	0.552245		0.559291	0.479399	0.538038	0.525576		0.625387	0.599816	0.468014	0.560663		0.602995	0.512708	0.513744	0.541808		1.525	0.264584	0.252186	0.239126	0.251965		0.609362	0.610168	0.493103	0.570877
6.2	0.541734	0.568069	0.533582	0.547795		0.554306	0.474205	0.533018	0.52051		0.61987	0.594616	0.462699	0.555329		0.598334	0.506719	0.508684	0.536539		1.55	0.262543	0.250696	0.237245	0.250161		0.606429	0.607079	0.489085	0.567531
6.3	0.537534	0.564695	0.527989	0.543406		0.549615	0.469274	0.527979	0.515623		0.613553	0.589552	0.457543	0.549865		0.592903	0.501444	0.503158	0.531133		1.575	0.261414	0.24918	0.235976	0.248857		0.600785	0.6028	0.484115	0.562567
6.4	0.531436	0.561598	0.522696	0.538577		0.544562	0.464513	0.523284	0.510786		0.610538	0.585222	0.452466	0.545656		0.588241	0.496631	0.498401	0.526387		1.6	0.25883	0.248218	0.234308	0.247119		0.598458	0.599226	0.479765	0.55915
6.5	0.527371	0.558174	0.517136	0.534227		0.539929	0.460072	0.518514	0.506172		0.605841	0.580465	0.447317	0.540778		0.583762	0.492069	0.49334	0.521692		1.625	0.258131	0.246913	0.232694	0.245913		0.593957	0.595061	0.47534	0.554786
6.6	0.524322	0.554951	0.51242	0.530564		0.53514	0.455236	0.513652	0.501342		0.601678	0.576543	0.442283	0.536392		0.579243	0.486098	0.487996	0.516384		1.65	0.25677	0.245653	0.231838	0.244753		0.590033	0.590797	0.470908	0.550579
6.7	0.518293	0.551779	0.507579	0.525884		0.529988	0.450813	0.508984	0.496595		0.597945	0.572469	0.437454	0.532151		0.573973	0.481446	0.482511	0.511269		1.675	0.254441	0.244634	0.230522	0.243199		0.585849	0.587106	0.466645	0.546533
6.8	0.514499	0.54869	0.502655	0.521948		0.525503	0.446146	0.504612	0.492087		0.593146	0.568496	0.432244	0.527498		0.568826	0.476028	0.477693	0.506129		1.7	0.253461	0.243388	0.229593	0.242147		0.582547	0.583464	0.462379	0.542797
6.9	0.50874	0.544905	0.498257	0.517301		0.520567	0.442232	0.499333	0.487377		0.587731	0.564472	0.428366	0.523118		0.564732	0.471679	0.47326	0.501834		1.725	0.251553	0.242176	0.228169	0.240632		0.578226	0.579585	0.458446	0.538752
7	0.504133	0.541926	0.493148	0.513069		0.516277	0.437753	0.49473	0.48292		0.58367	0.560994	0.422993	0.518798		0.560334	0.466456	0.468503	0.497023		1.75	0.249258	0.241237	0.22664	0.239045		0.574511	0.575713	0.454322	0.534848
7.1	0.498984	0.538711	0.488566	0.508754		0.51187	0.433736	0.489858	0.478488		0.578912	0.557312	0.418765	0.514607		0.555024	0.461484	0.464131	0.492134		1.775	0.248258	0.239843	0.225229	0.237777		0.57093	0.571645	0.450183	0.530919
7.2	0.496341	0.535463	0.4837	0.505168		0.507042	0.429219	0.485246	0.473836		0.574461	0.554209	0.413898	0.510484		0.550363	0.456939	0.458787	0.487297		1.8	0.248198	0.239094	0.224871	0.237388		0.567218	0.568436	0.446466	0.527373
7.3	0.490786	0.53245	0.478876	0.500704		0.502615	0.425286	0.480977	0.469626		0.56999	0.551055	0.409609	0.506542		0.545924	0.452162	0.453848	0.482577		1.825	0.246136	0.238055	0.223073	0.235755		0.564026	0.564933	0.442705	0.523888
7.4	0.488211	0.529572	0.474001	0.497261		0.498384	0.421626	0.476466	0.465492		0.565293	0.547389	0.405126	0.502285		0.542155	0.447581	0.449192	0.478231		1.85	0.244247	0.236653	0.221769	0.234223		0.560132	0.561234	0.438911	0.520092
7.5	0.484621	0.526886	0.47013	0.493879		0.493928	0.417326	0.472085	0.461113		0.561622	0.543058	0.400807	0.498152		0.537048	0.443179	0.444739	0.473587		1.875	0.243054	0.236247	0.220983	0.233428		0.556455	0.557923	0.435037	0.516472
7.6	0.478591	0.524226	0.465715	0.489511		0.489305	0.413873	0.468084	0.457087		0.556966	0.53941	0.396443	0.493955		0.532852	0.439507	0.43976	0.469332		1.9	0.241606	0.235038	0.220364	0.232336		0.553115	0.554529	0.431437	0.513027
7.7	0.476016	0.521691	0.461677	0.486461		0.485319	0.410222	0.463981	0.453174		0.551818	0.535181	0.392106	0.489418		0.528677	0.43441	0.435569	0.464818		1.925	0.239726	0.234104	0.219492	0.231108		0.548633	0.550823	0.428123	0.509193
7.8	0.470528	0.518762	0.457739	0.482343		0.480638	0.406477	0.460036	0.44905		0.548475	0.53155	0.387916	0.485673		0.523996	0.430774	0.431238	0.460626		1.95	0.239127	0.233185	0.218148	0.230153		0.546816	0.547515	0.424116	0.506149
7.9	0.465854	0.515883	0.452772	0.47817		0.47675	0.402667	0.455637	0.445018		0.543819	0.527612	0.383746	0.481443		0.520064	0.426621	0.426805	0.456455		1.975	0.238389	0.232385	0.217168	0.229314		0.542023	0.543888	0.420886	0.502266
8	0.462466	0.513097	0.448232	0.474598		0.472333	0.398734	0.450737	0.440601		0.539717	0.524662	0.380024	0.477882		0.51599	0.42229	0.42221	0.452121		2	0.237309	0.231448	0.216349	0.228369		0.539494	0.540931	0.417374	0.499266
8.1	0.459417	0.510369	0.444352	0.471379		0.468014	0.395186	0.446875	0.436692		0.535697	0.520996	0.376133	0.474032		0.51216	0.41803	0.418485	0.448169		2.025	0.235273	0.230846	0.21574	0.227287		0.535491	0.537977	0.414063	0.495844
8.2	0.454743	0.50765	0.44054	0.467644		0.464106	0.392006	0.44292	0.433011		0.53059	0.51687	0.373061	0.469992		0.507215	0.413895	0.413951	0.443649		2.05	0.234146	0.229637	0.214475	0.226086		0.532059	0.534241	0.411063	0.492454
8.3	0.453997	0.505401	0.436719	0.465372		0.460022	0.388477	0.439058	0.429186		0.52655	0.513392	0.368663	0.466023		0.503668	0.410134	0.410125	0.439935		2.075	0.233819	0.228658	0.214038	0.225505		0.529902	0.531554	0.40764	0.489699
8.4	0.450068	0.502807	0.432496	0.46179		0.45582	0.384582	0.434576	0.424993		0.522017	0.509829	0.364921	0.462112		0.499088	0.40673	0.405733	0.435841		2.1	0.232382	0.228037	0.212985	0.224468		0.52642	0.528627	0.404795	0.486614
8.5	0.446138	0.500449	0.428483	0.458357		0.451883	0.381016	0.43051	0.421136		0.518018	0.505345	0.361023	0.457978		0.495521	0.402559	0.401806	0.431941		2.125	0.231291	0.227449	0.211859	0.223533		0.523616	0.525203	0.401719	0.483513
8.6	0.443496	0.497847	0.424169	0.455171		0.448416	0.377553	0.426444	0.417471		0.515577	0.502037	0.35759	0.45488		0.491062	0.398496	0.397757	0.427756		2.15	0.229753	0.22662	0.211418	0.222597		0.520723	0.521049	0.398487	0.480086
8.7	0.439973	0.495237	0.420206	0.451805		0.44398	0.37426	0.422619	0.41362		0.511803	0.498628	0.353661	0.45118		0.487313	0.395181	0.394235	0.424236		2.175	0.229459	0.225749	0.211317	0.222175		0.515967	0.518648	0.395391	0.476669
8.8	0.435908	0.492677	0.416201	0.448262		0.440141	0.370798	0.418886	0.409942		0.507107	0.495269	0.349702	0.447216		0.482652	0.391135	0.390308	0.420032		2.2	0.227877	0.22437	0.209027	0.220425		0.514637	0.515397	0.392077	0.474037
8.9	0.431504	0.490059	0.41294	0.444834		0.436243	0.367702	0.415182	0.406375		0.504215	0.491023	0.346745	0.443824		0.479348	0.386821	0.38632	0.416145		2.225	0.226941	0.223879	0.208792	0.219871		0.510024	0.512406	0.389752	0.470727
9	0.428997	0.487667	0.408876	0.441847		0.432276	0.364512	0.41131	0.4027		0.501241	0.48833	0.343126	0.44072		0.475396	0.383542	0.382717	0.412548		2.25	0.225453	0.223342	0.208107	0.218968		0.507601	0.509719	0.386607	0.467976
9.1	0.425339	0.484964	0.40508	0.438461		0.428721	0.360927	0.407745	0.399131		0.497795	0.484323	0.339612	0.437053		0.471404	0.380262	0.378871	0.40886		2.275	0.224549	0.22244	0.20766	0.218216		0.505081	0.506291	0.383703	0.465025
9.2	0.420461	0.482849	0.401109	0.434806		0.424833	0.358368	0.404484	0.395895		0.493468	0.481033	0.336278	0.433443		0.467553	0.37668	0.375552	0.405276		2.3	0.224562	0.222247	0.206867	0.217892		0.502702	0.50318	0.381024	0.462302
9.3	0.417751	0.480273	0.397329	0.431784		0.42167	0.355065	0.40103	0.392588		0.489714	0.477742	0.332549	0.429861		0.463581	0.373204	0.371726	0.401531		2.325	0.223969	0.221086	0.2061	0.217052		0.499173	0.500407	0.378082	0.45922
9.4	0.413686	0.478024	0.393642	0.428451		0.418193	0.352007	0.397205	0.389135		0.485223	0.474383	0.328876	0.426059		0.460196	0.369853	0.368568	0.398231		2.35	0.222445	0.220958	0.205367	0.216257		0.497423	0.497302	0.3754	0.456708
9.5	0.410569	0.475732	0.390156	0.425486		0.41502	0.348573	0.393296	0.38563		0.48108	0.471485	0.32633	0.42292		0.45667	0.365861	0.364844	0.394472		2.375	0.221454	0.219607	0.204105	0.215056		0.493635	0.495015	0.372868	0.453839
9.6	0.406233	0.474213	0.386978	0.422475		0.411788	0.34592	0.389999	0.382569		0.478885	0.468501	0.322785	0.419969		0.452576	0.362368	0.360937	0.390655		2.4	0.220409	0.21965	0.203585	0.214548		0.490851	0.491703	0.370056	0.45087
9.7	0.404607	0.472098	0.383308	0.420004		0.408556	0.343313	0.386082	0.379317		0.475604	0.465415	0.319879	0.41689		0.448908	0.359124	0.357152	0.387104		2.425	0.219931	0.218347	0.202554	0.213611		0.488437	0.488407	0.367723	0.448189
9.8	0.400949	0.470168	0.379629	0.416915		0.405206	0.340142	0.382914	0.376088		0.471871	0.462483	0.316573	0.41359		0.444834	0.355434	0.353872	0.383423		2.45	0.21916	0.217976	0.202437	0.213191		0.485225	0.485544	0.365102	0.44529
9.9	0.396816	0.467994	0.375967	0.413592		0.401308	0.33731	0.3797	0.372773		0.468158	0.459294	0.313276	0.41021		0.441206	0.352155	0.350917	0.380136		2.475	0.218111	0.217612	0.20153	0.212418		0.48228	0.483847	0.362916	0.443014
10	0.394783	0.46603	0.372823	0.411212		0.397841	0.334544	0.376301	0.369562		0.465841	0.457214	0.309646	0.407512		0.437335	0.349267	0.347091	0.376635		2.5	0.217293	0.217175	0.201222	0.211897		0.4805	0.480257	0.360203	0.44032
10.1	0.39248	0.463471	0.369938	0.40863		0.394237	0.331166	0.373328	0.366244		0.462723	0.454452	0.307169	0.404746		0.434255	0.345649	0.344359	0.373471		2.525	0.216	0.216077	0.200135	0.210737		0.477169	0.478007	0.357766	0.437647
10.2	0.388347	0.461062	0.367346	0.405585		0.390643	0.328927	0.370096	0.363222		0.458375	0.450787	0.304324	0.401171		0.431397	0.342887	0.341403	0.370617		2.55	0.215829	0.215433	0.199177	0.210146		0.473452	0.474497	0.355047	0.434332
10.3	0.385163	0.458796	0.364169	0.402709		0.387215	0.326414	0.367077	0.360235		0.455627	0.447258	0.300976	0.397935		0.427668	0.339411	0.337618	0.366962		2.575	0.214464	0.215211	0.19891	0.209528		0.470608	0.472032	0.352886	0.431842
10.4	0.381911	0.456337	0.360942	0.39973		0.384199	0.323545	0.3644	0.357381		0.45214	0.443745	0.298054	0.394639		0.424547	0.336256	0.334217	0.363739		2.6	0.21453	0.213821	0.198273	0.208874		0.46853	0.469466	0.35074	0.429579
10.5	0.380691	0.453945	0.357581	0.397406		0.38084	0.320901	0.361918	0.354553		0.448674	0.441461	0.295525	0.391921		0.420696	0.333529	0.330938	0.360478		2.625	0.21306	0.213454	0.198007	0.208174		0.466481	0.467276	0.348528	0.427428
10.6	0.376355	0.451478	0.353709	0.393847		0.377931	0.318464	0.35926	0.351885		0.4441	0.437949	0.29301	0.388451		0.417454	0.330606	0.327659	0.357339		2.65	0.212425	0.21329	0.196472	0.207396		0.463321	0.464375	0.346087	0.424594
10.7	0.373848	0.449547	0.350332	0.391242		0.374787	0.315942	0.355842	0.348857		0.441598	0.435238	0.289812	0.385629		0.414231	0.327844	0.324501	0.354304		2.675	0.21112	0.212705	0.196069	0.206631		0.462193	0.461094	0.343994	0.422427
10.8	0.371341	0.447382	0.347589	0.388771		0.371937	0.313138	0.352554	0.345876		0.438399	0.432459	0.287385	0.382851		0.411232	0.324814	0.321485	0.351288		2.7	0.210197	0.211488	0.195565	0.20575		0.459272	0.458513	0.341963	0.419916
10.9	0.368157	0.445342	0.34493	0.386143		0.368881	0.310165	0.349405	0.342817		0.435814	0.429969	0.284612	0.380234		0.407807	0.321748	0.318773	0.348221		2.725	0.209317	0.211326	0.194851	0.205165		0.456143	0.456586	0.339739	0.417489
11	0.365718	0.443169	0.341987	0.383625		0.365747	0.307634	0.346025	0.339802		0.433599	0.426832	0.281968	0.377541		0.405598	0.318825	0.316161	0.345625		2.75	0.209604	0.210608	0.194702	0.204971		0.453852	0.454378	0.337472	0.415234
11.1	0.362805	0.440911	0.33876	0.380825		0.362594	0.304952	0.342543	0.336696		0.430092	0.424633	0.278916	0.374657		0.402294	0.315795	0.313246	0.342544		2.775	0.208244	0.210372	0.194017	0.204211		0.451499	0.451416	0.335263	0.412726
11.2	0.360298	0.438838	0.335608	0.378248		0.359656	0.302449	0.339801	0.333969		0.427241	0.42199	0.276415	0.372003		0.398545	0.31264	0.31104	0.339503		2.8	0.2068	0.209776	0.193735	0.203437		0.44889	0.448444	0.333229	0.410188
11.3	0.358537	0.436883	0.331996	0.375805		0.356473	0.299946	0.336763	0.331061		0.422709	0.419723	0.274491	0.369193		0.395586	0.310305	0.307255	0.336506		2.825	0.20653	0.208678	0.192603	0.202604		0.446329	0.446634	0.331253	0.408072
11.4	0.354878	0.434717	0.32896	0.372852		0.353417	0.297886	0.333938	0.328414		0.420104	0.417012	0.27181	0.366524		0.391796	0.306866	0.304704	0.333239		2.85	0.205498	0.208587	0.192647	0.202244		0.445061	0.444012	0.329288	0.40612
11.5	0.352236	0.432602	0.326293	0.370377		0.351086	0.295317	0.330752	0.325719		0.417622	0.413244	0.269543	0.363664		0.389283	0.30437	0.302255	0.330752		2.875	0.206325	0.208729	0.192476	0.20251		0.442254	0.441521	0.327281	0.403685
11.6	0.350474	0.429967	0.3234	0.367947		0.348471	0.293068	0.327752	0.323097		0.414484	0.410039	0.267385	0.360849		0.386101	0.301679	0.299441	0.327866		2.9	0.204182	0.207781	0.191623	0.201195		0.44018	0.439298	0.325243	0.401574
11.7	0.347967	0.428179	0.320407	0.365518		0.345915	0.291309	0.325075	0.320766		0.411572	0.407856	0.264346	0.35815		0.382939	0.298899	0.29679	0.325005		2.925	0.20438	0.207327	0.191081	0.200929		0.437402	0.435956	0.323426	0.398928
11.8	0.345257	0.426148	0.31784	0.363082		0.343006	0.288938	0.321963	0.317969		0.40989	0.404225	0.261777	0.355466		0.379535	0.295708	0.29432	0.321976		2.95	0.203457	0.207265	0.190694	0.200472		0.435059	0.434481	0.321201	0.396914
11.9	0.342412	0.423991	0.315148	0.360517		0.340068	0.286886	0.319648	0.315534		0.406629	0.401616	0.259507	0.352786		0.376981	0.293159	0.291689	0.319399		2.975	0.201772	0.206305	0.190697	0.199591		0.432446	0.433102	0.319569	0.395039
12	0.338279	0.422321	0.312506	0.357702		0.33715	0.284346	0.31724	0.312912		0.405521	0.399587	0.257168	0.350918		0.374529	0.290896	0.289523	0.317107		3	0.201537	0.205715	0.189815	0.199022		0.430883	0.430057	0.31799	0.392977
12.1	0.336043	0.420131	0.309864	0.355346		0.334319	0.282229	0.314582	0.310377		0.402137	0.397013	0.254847	0.348195		0.371428	0.288026	0.28679	0.314207		3.025	0.201324	0.204983	0.189409	0.198572		0.427102	0.427615	0.315828	0.390182
12.2	0.332791	0.418234	0.306845	0.352623		0.331303	0.279792	0.312081	0.307725		0.399922	0.39541	0.252852	0.346274		0.368692	0.285032	0.284604	0.311553		3.05	0.201058	0.20469	0.188972	0.19824		0.425419	0.424457	0.314139	0.388005
12.3	0.330488	0.416136	0.304404	0.350343		0.328404	0.277327	0.309451	0.30506		0.39623	0.392648	0.250847	0.343507		0.365753	0.282644	0.281466	0.30875		3.075	0.199934	0.204307	0.18816	0.197467		0.424361	0.422356	0.312227	0.386315
12.4	0.329133	0.414138	0.301996	0.348422		0.325299	0.275285	0.306515	0.302366		0.393605	0.389665	0.248774	0.340951		0.363017	0.279845	0.278875	0.306038		3.1	0.200516	0.204236	0.187814	0.197522		0.421287	0.419874	0.310472	0.383878
12.5	0.32622	0.412451	0.299747	0.346139		0.322772	0.27265	0.303579	0.299667		0.391821	0.387465	0.246293	0.338774		0.360139	0.277653	0.276386	0.303532		3.125	0.199121	0.203816	0.187326	0.196754		0.41919	0.417992	0.308947	0.382043
12.6	0.322493	0.410488	0.296962	0.343314		0.320706	0.270458	0.301226	0.297463		0.388375	0.385419	0.244179	0.336293		0.357079	0.274855	0.274321	0.300885		3.15	0.198305	0.203215	0.186308	0.195942		0.417209	0.415237	0.307295	0.379914
12.7	0.319648	0.408389	0.294488	0.340842		0.318179	0.26852	0.298392	0.29503		0.386898	0.383612	0.241198	0.334168		0.354586	0.272698	0.271993	0.298566		3.175	0.197639	0.202454	0.186447	0.195513		0.414662	0.413815	0.305435	0.377971
12.8	0.318428	0.406526	0.291561	0.338838		0.315936	0.266581	0.295623	0.292714		0.384314	0.381856	0.239006	0.332014		0.35185	0.270007	0.269625	0.295964		3.2	0.197801	0.201776	0.185775	0.195117		0.412921	0.410779	0.303997	0.375899
12.9	0.31626	0.404453	0.28917	0.336628		0.313214	0.264925	0.293122	0.29042		0.38333	0.379674	0.237127	0.330291		0.348608	0.268082	0.266953	0.293381		3.225	0.196824	0.200995	0.185245	0.194355		0.410757	0.409225	0.302407	0.37413
13	0.313618	0.402775	0.286862	0.334418		0.310491	0.262592	0.290335	0.287806		0.380335	0.377849	0.23487	0.32797		0.345466	0.265676	0.264402	0.290694		3.25	0.196261	0.201381	0.184931	0.194191		0.408929	0.407198	0.300857	0.372328
13.1	0.311518	0.400399	0.284279	0.332065		0.308141	0.260851	0.287945	0.285646		0.376602	0.374866	0.2331	0.325196		0.343399	0.263483	0.263006	0.288796		3.275	0.195566	0.20087	0.184323	0.193586		0.40649	0.405425	0.299201	0.370372
13.2	0.309553	0.398503	0.281896	0.329984		0.30579	0.259026	0.285556	0.283457		0.37449	0.372479	0.231169	0.323051		0.341048	0.261541	0.260253	0.286464		3.3	0.195342	0.200399	0.18404	0.19326		0.405514	0.403097	0.29762	0.368744
13.3	0.307249	0.396396	0.279337	0.327661		0.303146	0.257633	0.283481	0.28142		0.371577	0.370416	0.229205	0.320774		0.338312	0.260168	0.25837	0.284495		3.325	0.194241	0.200507	0.18399	0.192912		0.403124	0.401007	0.296098	0.366743
13.4	0.303591	0.394776	0.276846	0.325071		0.300932	0.255328	0.28099	0.279083		0.368768	0.368182	0.227607	0.318597		0.33586	0.257584	0.256143	0.282067		3.35	0.195026	0.199326	0.183628	0.19266		0.401047	0.398832	0.294391	0.364757
13.5	0.302304	0.392854	0.274647	0.323268		0.298934	0.253644	0.278554	0.277044		0.366347	0.365574	0.225364	0.316173		0.333043	0.255534	0.25416	0.279793		3.375	0.193254	0.199139	0.182689	0.191694		0.398442	0.396779	0.293099	0.362773
13.6	0.30061	0.39105	0.272573	0.321411		0.297015	0.251498	0.276368	0.27496		0.365014	0.36421	0.223665	0.314699		0.330145	0.253609	0.251771	0.27741		3.4	0.192626	0.19896	0.182667	0.191418		0.39616	0.395313	0.291577	0.361017
13.7	0.299255	0.389086	0.2706	0.319647		0.294537	0.249607	0.273886	0.272677		0.361938	0.361721	0.22149	0.312149		0.327753	0.251435	0.249868	0.275253		3.425	0.193317	0.198384	0.182553	0.191418		0.394701	0.392113	0.290018	0.358944
13.8	0.29668	0.387391	0.268844	0.317638		0.291873	0.247565	0.271654	0.270364		0.360071	0.359845	0.219672	0.310296		0.325341	0.24951	0.247581	0.273058		3.45	0.192355	0.198103	0.181969	0.190809		0.392343	0.390554	0.288569	0.357155
13.9	0.294377	0.385855	0.266921	0.315718		0.289542	0.245796	0.269524	0.268287		0.359087	0.357544	0.218166	0.308663		0.323132	0.247496	0.246225	0.271191		3.475	0.191388	0.198149	0.181199	0.190245		0.390815	0.388552	0.287082	0.355483
14	0.292209	0.384143	0.264279	0.313544		0.287397	0.244037	0.267458	0.266298		0.356195	0.355941	0.216134	0.30653		0.320559	0.245874	0.244525	0.269241		3.5	0.190815	0.197728	0.181395	0.189979		0.388336	0.387053	0.285783	0.353724
14.1	0.290583	0.382145	0.261821	0.311516		0.284998	0.242494	0.265458	0.264316		0.354185	0.353298	0.214557	0.30445		0.318349	0.243272	0.241873	0.266748		3.525	0.190766	0.196922	0.180114	0.189268		0.387056	0.384596	0.284092	0.351915
14.2	0.287737	0.380408	0.259764	0.309303		0.283147	0.240104	0.262994	0.262082		0.352421	0.350809	0.212521	0.302334		0.316363	0.2414	0.240112	0.264876		3.55	0.189247	0.197022	0.180339	0.188869		0.38475	0.383361	0.282863	0.350324
14.3	0.287331	0.378016	0.257573	0.30764		0.281071	0.238288	0.260827	0.260062		0.350104	0.349189	0.211117	0.300586		0.313567	0.239297	0.238472	0.262699		3.575	0.189408	0.196131	0.17955	0.188363		0.383437	0.381188	0.281688	0.348771
14.4	0.285366	0.37617	0.256051	0.305862		0.278563	0.236641	0.258437	0.257881		0.347068	0.347518	0.209214	0.298433		0.311337	0.237818	0.236468	0.260814		3.6	0.188634	0.19579	0.179518	0.187981		0.381421	0.379364	0.280197	0.346994
14.5	0.283469	0.374147	0.254011	0.303876		0.276487	0.234948	0.256085	0.25584		0.345058	0.345558	0.207478	0.296537		0.308905	0.235465	0.23493	0.258696		3.625	0.188321	0.19564	0.178906	0.187622		0.379734	0.377633	0.278884	0.345417
14.6	0.282317	0.372427	0.251352	0.302032		0.274166	0.233198	0.253825	0.25373		0.34352	0.343512	0.205568	0.294688		0.307446	0.233754	0.232703	0.2569		3.65	0.187382	0.195515	0.179299	0.187399		0.377271	0.375133	0.277565	0.343323
14.7	0.280014	0.370807	0.249011	0.299944		0.27161	0.231692	0.251612	0.251638		0.341469	0.340784	0.204334	0.292688		0.304629	0.23215	0.23078	0.254808		3.675	0.186997	0.194868	0.178497	0.186787		0.376078	0.373564	0.276298	0.34198
14.8	0.277778	0.368709	0.247063	0.29785		0.269367	0.229829	0.25012	0.249772		0.339438	0.339113	0.202471	0.290843		0.302602	0.230421	0.229485	0.253122		3.7	0.186813	0.194275	0.178484	0.186524		0.374283	0.372229	0.274698	0.340403
14.9	0.275339	0.367013	0.245491	0.295948		0.267614	0.227994	0.248333	0.24798		0.337141	0.337868	0.200905	0.289176		0.301001	0.228193	0.227663	0.251224		3.725	0.186449	0.194385	0.177974	0.186269		0.371622	0.370476	0.2739	0.338666
15	0.273577	0.365645	0.243267	0.294163		0.265361	0.226376	0.246573	0.246104		0.334434	0.335806	0.199647	0.287209		0.298589	0.226838	0.225375	0.249235		3.75	0.186527	0.193715	0.177263	0.185835		0.370109	0.36876	0.272631	0.337167
15.1	0.271883	0.363984	0.241913	0.292593		0.263364	0.224287	0.244017	0.243889		0.332096	0.33497	0.197819	0.285582		0.296076	0.225038	0.22406	0.247362		3.775	0.185557	0.193486	0.177622	0.185555		0.368517	0.366817	0.271472	0.335602
15.2	0.269512	0.362607	0.239413	0.290511		0.261542	0.222791	0.242211	0.242181		0.32984	0.332685	0.196388	0.283608		0.293624	0.222846	0.222015	0.245134		3.8	0.184596	0.193077	0.176914	0.184863		0.36677	0.365309	0.269894	0.333991
15.3	0.268157	0.35998	0.237381	0.288506		0.25973	0.221455	0.240294	0.240493		0.328568	0.330793	0.194967	0.282064		0.291435	0.221367	0.220558	0.243436		3.825	0.185039	0.193159	0.176537	0.184912		0.365352	0.363905	0.268497	0.332585
15.4	0.26477	0.358369	0.235316	0.286152		0.258016	0.219187	0.238627	0.23861		0.326251	0.328747	0.193044	0.279982		0.289773	0.219656	0.218675	0.241686		3.85	0.184558	0.192603	0.176378	0.184513		0.363465	0.361589	0.267554	0.330869
15.5	0.262398	0.356447	0.233242	0.284029		0.256322	0.217719	0.236404	0.236815		0.32461	0.326633	0.19179	0.278311		0.287504	0.218622	0.216752	0.239974		3.875	0.183772	0.192189	0.17602	0.183993		0.362671	0.360096	0.26667	0.329812
15.6	0.260366	0.354793	0.231236	0.282132		0.254363	0.215565	0.234459	0.234796		0.322702	0.324655	0.18992	0.276392		0.285274	0.216804	0.215518	0.238211		3.9	0.182715	0.191726	0.175614	0.183352		0.360982	0.358663	0.265294	0.328313
15.7	0.259079	0.353417	0.229664	0.28072		0.252395	0.214332	0.232162	0.232963		0.321985	0.323035	0.189394	0.275424		0.283004	0.214665	0.213878	0.23619		3.925	0.18349	0.191493	0.175795	0.183593		0.359064	0.356445	0.264165	0.326558
15.8	0.256978	0.351923	0.227975	0.278959		0.250436	0.212638	0.230217	0.231097		0.3194	0.321262	0.187589	0.273402		0.28114	0.213132	0.212157	0.234491		3.95	0.181376	0.191343	0.175262	0.18266		0.35665	0.355513	0.262641	0.324934
15.9	0.25542	0.350169	0.22596	0.277183		0.248565	0.211312	0.228726	0.229534		0.318354	0.319421	0.186029	0.271893		0.279073	0.211546	0.210396	0.232696		3.975	0.181594	0.190923	0.17471	0.182409		0.354772	0.353166	0.261716	0.323218
16	0.254472	0.348658	0.224162	0.275764		0.246557	0.210145	0.226911	0.227871		0.316119	0.317307	0.184252	0.269863		0.277026	0.209853	0.208959	0.230972		4	0.181744	0.19042	0.174327	0.182164		0.353065	0.351654	0.260453	0.321724
16.1	0.254472	0.347013	0.222256	0.27458		0.244658	0.208903	0.22591	0.22649		0.315237	0.315022	0.182736	0.268262		0.275222	0.207625	0.207097	0.228996		4.025	0.181674	0.190202	0.174726	0.182201		0.352781	0.350202	0.259336	0.320773
16.2	0.251694	0.345528	0.220926	0.272716		0.242209	0.20704	0.223799	0.224349		0.313391	0.313999	0.181431	0.266898		0.273722	0.206484	0.205639	0.22764		4.05	0.181156	0.189935	0.174358	0.181816		0.351374	0.348985	0.258396	0.319585
16.3	0.249729	0.343765	0.219379	0.270958		0.240476	0.205591	0.222178	0.222748		0.311073	0.312465	0.180146	0.265222		0.271554	0.205201	0.204121	0.225999		4.075	0.18078	0.189629	0.173604	0.181338		0.348758	0.347097	0.257231	0.317695
16.4	0.248035	0.341969	0.218142	0.269382		0.238899	0.204462	0.220474	0.221278		0.309084	0.311715	0.178831	0.263908		0.270155	0.203436	0.202117	0.224275		4.1	0.179922	0.189657	0.173778	0.181119		0.347716	0.34562	0.256326	0.316554
16.5	0.247154	0.340098	0.216478	0.26791		0.237391	0.203314	0.21877	0.219825		0.308161	0.310402	0.177094	0.26256		0.267946	0.202224	0.20066	0.222667		4.125	0.180063	0.188959	0.173572	0.180864		0.344817	0.343926	0.255467	0.314737
16.6	0.246748	0.338537	0.21443	0.266572		0.235833	0.201592	0.217325	0.21825		0.306192	0.30868	0.175775	0.260908		0.265838	0.200585	0.200113	0.221227		4.15	0.179356	0.18876	0.172792	0.180303		0.344309	0.342168	0.254167	0.313548
16.7	0.244106	0.337093	0.212063	0.264421		0.234413	0.200068	0.215639	0.216707		0.303444	0.307265	0.174372	0.259106		0.264075	0.199355	0.198292	0.219638		4.175	0.179315	0.188411	0.172963	0.18023		0.343318	0.340622	0.25308	0.31234
16.8	0.243293	0.335423	0.210182	0.262966		0.232494	0.199061	0.213333	0.214963		0.301659	0.305219	0.173223	0.257454		0.262089	0.197858	0.197279	0.21814		4.2	0.178728	0.18788	0.171891	0.1795		0.34175	0.338779	0.252207	0.310912
16.9	0.241125	0.333929	0.208752	0.261269		0.23028	0.197762	0.211305	0.213116		0.300962	0.303531	0.17185	0.256168		0.260204	0.1962	0.195923	0.216506		4.225	0.178111	0.187863	0.17217	0.179382		0.340727	0.337509	0.251107	0.309781
17	0.238889	0.332209	0.207381	0.259493		0.228909	0.196436	0.209712	0.211686		0.298193	0.302815	0.170892	0.254765		0.258887	0.194596	0.194486	0.215047		4.25	0.178309	0.187415	0.171786	0.17917		0.338459	0.336388	0.25012	0.308322
17.1	0.236992	0.33069	0.205993	0.257892		0.227107	0.194921	0.207674	0.209901		0.296921	0.300206	0.169573	0.253005		0.257043	0.192849	0.192907	0.213323		4.275	0.177014	0.187256	0.171447	0.178572		0.336313	0.335032	0.24919	0.306845
17.2	0.236247	0.328927	0.20407	0.256415		0.225246	0.19366	0.206081	0.208329		0.294624	0.298058	0.168397	0.251157		0.254773	0.191512	0.191389	0.211631		4.3	0.176713	0.186964	0.170759	0.178145		0.335657	0.333505	0.248261	0.305808
17.3	0.23523	0.326871	0.202365	0.254822		0.223699	0.192042	0.204979	0.206907		0.293517	0.296387	0.167136	0.249796		0.253233	0.190033	0.190134	0.210203		4.325	0.176947	0.186495	0.17112	0.178188		0.333895	0.331719	0.247182	0.304265
17.4	0.233333	0.325427	0.200935	0.253232		0.222181	0.19032	0.203562	0.205354		0.291856	0.294989	0.165875	0.24837		0.25149	0.188946	0.188515	0.208737		4.35	0.175804	0.186294	0.170607	0.177568		0.33379	0.330987	0.246238	0.303672
17.5	0.230623	0.323581	0.198853	0.251019		0.219948	0.1892	0.201663	0.203604		0.29122	0.292926	0.164662	0.247026		0.249787	0.187467	0.187381	0.207297		4.375	0.176168	0.185874	0.170385	0.177475		0.330514	0.329272	0.245176	0.301654
17.6	0.229201	0.321735	0.19713	0.249355		0.218528	0.187459	0.200089	0.202025		0.290194	0.2925	0.163055	0.246006		0.247801	0.185845	0.186511	0.205799		4.4	0.176391	0.18551	0.169804	0.177235		0.330386	0.327522	0.244327	0.300745
17.7	0.227846	0.32056	0.196161	0.248189		0.217157	0.186368	0.199098	0.200874		0.289702	0.291102	0.162083	0.245024		0.246605	0.184544	0.185357	0.204579		4.425	0.175383	0.185811	0.170166	0.17712		0.328647	0.326216	0.243356	0.299406
17.8	0.225407	0.318873	0.194948	0.246409		0.215599	0.185389	0.197783	0.199591		0.288718	0.290266	0.161185	0.244123		0.24468	0.183403	0.184486	0.203274		4.45	0.175065	0.185312	0.169351	0.176576		0.326813	0.324968	0.242538	0.298106
17.9	0.224119	0.317337	0.193301	0.244919		0.214679	0.184194	0.196634	0.198503		0.286256	0.288698	0.159833	0.242369		0.243018	0.181888	0.182928	0.201698		4.475	0.174268	0.185042	0.169437	0.176249		0.326074	0.323358	0.241454	0.296962
18	0.224526	0.315616	0.191712	0.243951		0.213122	0.183301	0.194782	0.197068		0.284534	0.28701	0.15867	0.240857		0.24087	0.181282	0.181875	0.200459		4.5	0.173995	0.184685	0.168891	0.175857		0.323769	0.321889	0.240601	0.295419
18.1	0.222087	0.314307	0.190299	0.242231		0.211927	0.181917	0.193272	0.195706		0.282339	0.285731	0.15798	0.239518		0.239492	0.179268	0.180236	0.198767		4.525	0.173976	0.184211	0.169164	0.175783		0.322922	0.320319	0.239911	0.294384
18.2	0.220257	0.312771	0.188544	0.240524		0.210154	0.180111	0.191985	0.194083		0.280637	0.283617	0.15709	0.237958		0.237506	0.178002	0.179284	0.197372		4.55	0.173217	0.184409	0.168939	0.175522		0.321429	0.318934	0.238794	0.293053
18.3	0.218835	0.311286	0.187298	0.23914		0.208959	0.178982	0.190911	0.192951		0.279345	0.282714	0.155809	0.236807		0.236046	0.177307	0.177341	0.196035		4.575	0.172868	0.184074	0.168634	0.175192		0.320267	0.31745	0.237935	0.291884
18.4	0.217276	0.310161	0.185952	0.237796		0.20751	0.177928	0.18979	0.191743		0.27676	0.280992	0.154915	0.235125		0.234709	0.176719	0.176309	0.195066		4.6	0.172364	0.183615	0.168764	0.174914		0.318483	0.315763	0.237174	0.290473
18.5	0.217615	0.308927	0.183995	0.236846		0.205365	0.176724	0.188373	0.190154		0.27594	0.279099	0.153895	0.233856		0.23331	0.174705	0.17477	0.1934		4.625	0.17283	0.183842	0.168028	0.1749		0.317266	0.315299	0.23614	0.289568
18.6	0.214566	0.307224	0.182733	0.234841		0.204131	0.175453	0.186928	0.188837		0.274771	0.277769	0.15292	0.232699		0.231446	0.174687	0.17392	0.192528		4.65	0.171837	0.183107	0.168197	0.17438		0.31621	0.313749	0.235402	0.288454
18.7	0.214363	0.305746	0.181219	0.233776		0.202584	0.174061	0.185669	0.187438		0.274073	0.276934	0.151798	0.231803		0.230088	0.173564	0.172746	0.191314		4.675	0.171741	0.182965	0.167673	0.174126		0.314486	0.312768	0.234491	0.287249
18.8	0.21294	0.304085	0.180024	0.23235		0.20134	0.17327	0.182936	0.185849		0.271243	0.27603	0.150901	0.230336		0.228771	0.172923	0.17139	0.190229		4.7	0.172707	0.182647	0.167645	0.174333		0.313102	0.310825	0.233764	0.285897
18.9	0.21084	0.302616	0.17836	0.230605		0.200037	0.171868	0.181797	0.184568		0.270997	0.274786	0.150092	0.229539		0.226784	0.171265	0.170115	0.188589		4.725	0.171113	0.181934	0.167239	0.173429		0.311868	0.309025	0.232877	0.28459
19	0.210908	0.301483	0.176863	0.229751		0.198558	0.170852	0.180538	0.183316		0.268884	0.2732	0.148981	0.227966		0.225528	0.170053	0.169588	0.187582		4.75	0.170528	0.182017	0.166957	0.173167		0.310177	0.308517	0.231898	0.283531
19.1	0.211111	0.300274	0.175534	0.228973		0.197324	0.169836	0.179519	0.182226		0.266977	0.272569	0.147825	0.226776		0.223947	0.169536	0.168273	0.186471		4.775	0.171267	0.18152	0.166757	0.173181		0.309898	0.307275	0.231396	0.282856
19.2	0.209214	0.298546	0.174204	0.227321		0.19517	0.168368	0.178796	0.180778		0.265049	0.27141	0.146809	0.225441		0.222589	0.168592	0.167382	0.185412		4.8	0.170276	0.181571	0.166795	0.172881		0.308069	0.305773	0.23042	0.281421
19.3	0.207588	0.297211	0.173234	0.226011		0.193808	0.167371	0.177009	0.179396		0.263244	0.269023	0.145776	0.223704		0.220846	0.167005	0.16635	0.183952		4.825	0.169796	0.18089	0.166411	0.172366		0.305768	0.304038	0.229611	0.279806
19.4	0.205623	0.296263	0.17229	0.224725		0.19232	0.166063	0.175499	0.177961		0.262198	0.267505	0.144692	0.222479		0.219225	0.165918	0.164993	0.182609		4.85	0.16943	0.180998	0.16578	0.172069		0.305617	0.303085	0.228683	0.279128
19.5	0.204607	0.294467	0.171378	0.223484		0.191321	0.165113	0.174379	0.176937		0.261009	0.265971	0.143584	0.221196		0.218313	0.165187	0.163981	0.181731		4.875	0.169459	0.180836	0.165422	0.171906		0.304123	0.302448	0.227794	0.278122
19.6	0.202304	0.292838	0.170743	0.221962		0.190116	0.164031	0.173499	0.175882		0.260639	0.264726	0.143033	0.220454		0.216651	0.164029	0.162989	0.180465		4.9	0.168796	0.180765	0.165403	0.171655		0.303647	0.301502	0.227183	0.277444
19.7	0.202575	0.29142	0.169681	0.221225		0.188539	0.16308	0.172341	0.174654		0.258506	0.262987	0.141477	0.218664		0.21501	0.162781	0.162321	0.179277		4.925	0.169255	0.180087	0.16507	0.171471		0.302568	0.299897	0.2262	0.276222
19.8	0.200745	0.290027	0.167816	0.219529		0.187178	0.162092	0.171091	0.173454		0.256722	0.261794	0.141113	0.217591		0.213368	0.161605	0.160823	0.17785		4.95	0.16806	0.179846	0.165146	0.171017		0.301243	0.298778	0.225733	0.275251
19.9	0.200474	0.288516	0.166738	0.218576		0.185846	0.16117	0.16997	0.172329		0.254425	0.260941	0.140087	0.216253		0.212395	0.160678	0.159832	0.176887		4.975	0.168793	0.179982	0.164597	0.171124		0.29942	0.297207	0.224817	0.273815
20	0.198442	0.287048	0.165241	0.21691		0.184974	0.15974	0.168729	0.171148		0.252866	0.25985	0.139478	0.215196		0.210936	0.159894	0.158779	0.175802		5	0.16783	0.179582	0.164328	0.17058		0.298033	0.296447	0.224186	0.272889
20.1	0.19729	0.285822	0.164647	0.21592		0.183623	0.158696	0.167053	0.16979		0.251841	0.25881	0.138289	0.214107		0.209801	0.158807	0.157909	0.174769		5.025	0.167916	0.179006	0.164204	0.170375		0.295603	0.295127	0.223456	0.271395
20.2	0.194986	0.284656	0.16346	0.214367		0.182457	0.15751	0.165598	0.168522		0.251738	0.257907	0.137307	0.213411		0.207491	0.15804	0.156957	0.173452		5.05	0.167541	0.179187	0.163611	0.170113		0.295876	0.294213	0.222565	0.270885
20.3	0.194783	0.28333	0.162315	0.213476		0.181498	0.156597	0.164191	0.167429		0.250569	0.25685	0.136019	0.212239		0.206437	0.15681	0.155297	0.172141		5.075	0.166975	0.178776	0.163535	0.169762		0.294001	0.292726	0.222026	0.269585
20.4	0.194512	0.281676	0.161529	0.212572		0.179999	0.155242	0.163357	0.1662		0.249708	0.256577	0.135689	0.211774		0.205018	0.156169	0.154063	0.171062		5.1	0.166508	0.178727	0.163405	0.169547		0.293303	0.291795	0.221215	0.268771
20.5	0.19336	0.280568	0.16035	0.211426		0.178471	0.154433	0.162283	0.165062		0.249195	0.255162	0.135227	0.21096		0.204045	0.155384	0.153516	0.170294		5.125	0.166026	0.178435	0.163643	0.169368		0.29184	0.290349	0.220746	0.267645
20.6	0.192886	0.279024	0.158753	0.210221		0.177316	0.153473	0.161292	0.164027		0.248005	0.253354	0.13437	0.209671		0.202363	0.154262	0.152221	0.168938		5.15	0.165288	0.177768	0.163088	0.168714		0.29071	0.289866	0.219813	0.266796
20.7	0.190583	0.277774	0.156955	0.208437		0.175817	0.152448	0.159958	0.162741		0.246221	0.252383	0.133378	0.208453		0.201492	0.153067	0.151067	0.167859		5.175	0.16674	0.178114	0.163297	0.169384		0.290097	0.288341	0.219275	0.265904
20.8	0.190244	0.276515	0.155902	0.207554		0.174946	0.151704	0.158893	0.161848		0.244355	0.251104	0.132926	0.207295		0.200377	0.153121	0.150014	0.167188		5.2	0.165076	0.177609	0.163237	0.168641		0.288101	0.28705	0.218487	0.264546
20.9	0.188957	0.275029	0.154798	0.206261		0.174221	0.150246	0.157754	0.16074		0.243575	0.250388	0.132134	0.206533		0.199283	0.15116	0.148941	0.165786		5.225	0.166023	0.177649	0.162625	0.168766		0.287944	0.286682	0.217582	0.264069
21	0.187873	0.273577	0.153519	0.20499		0.173281	0.149296	0.156781	0.159786		0.241688	0.248785	0.131203	0.205085		0.197742	0.150501	0.148172	0.164811		5.25	0.164915	0.177155	0.162149	0.168073		0.285401	0.285023	0.2169	0.262441
21.1	0.187398	0.272201	0.152198	0.203932		0.172301	0.148185	0.155679	0.158722		0.24054	0.248512	0.130326	0.204342		0.196364	0.149146	0.147261	0.163591		5.275	0.164889	0.176806	0.16213	0.167942		0.284879	0.283642	0.216487	0.261669
21.2	0.186043	0.270321	0.151353	0.202572		0.170597	0.14684	0.15454	0.157326		0.238263	0.247626	0.129568	0.203093		0.194864	0.148487	0.146674	0.162686		5.3	0.164978	0.177178	0.162073	0.168076		0.283445	0.282524	0.215759	0.260576
21.3	0.184553	0.269054	0.150149	0.201252		0.168883	0.146257	0.153873	0.156338		0.237833	0.246449	0.128477	0.202166		0.194378	0.14772	0.145865	0.161995		5.325	0.164131	0.176971	0.162051	0.167717		0.282338	0.281447	0.215079	0.259621
21.4	0.184079	0.267946	0.149204	0.20041		0.167473	0.145306	0.152817	0.155199		0.236479	0.245273	0.127763	0.201101		0.193466	0.14715	0.144832	0.161169		5.35	0.164964	0.175997	0.162095	0.167685		0.282206	0.280745	0.214282	0.259078
21.5	0.183333	0.266871	0.148368	0.199524		0.166366	0.144346	0.151604	0.154106		0.235925	0.244199	0.127046	0.200306		0.192027	0.146295	0.144326	0.160239		5.375	0.164079	0.176119	0.161591	0.167263		0.280286	0.279893	0.213649	0.257943
21.6	0.182588	0.265772	0.147541	0.198634		0.165436	0.14301	0.150141	0.152862		0.235371	0.242664	0.12618	0.199295		0.190811	0.145617	0.14384	0.159451		5.4	0.163592	0.175838	0.161537	0.166989		0.279436	0.277853	0.213026	0.256772
21.7	0.181301	0.264236	0.146303	0.19728		0.164574	0.14206	0.149622	0.152085		0.23451	0.24142	0.125561	0.198385		0.190203	0.144049	0.14297	0.158411		5.425	0.163537	0.175606	0.161236	0.166793		0.277982	0.277775	0.212326	0.256028
21.8	0.180759	0.262952	0.145099	0.19627		0.163575	0.140874	0.148705	0.151052		0.232828	0.240533	0.125269	0.197475		0.188825	0.143871	0.142261	0.157682		5.45	0.163739	0.175041	0.160776	0.166518		0.27824	0.276601	0.211912	0.255584
21.9	0.180691	0.261693	0.143786	0.19539		0.162488	0.140046	0.147899	0.150145		0.232336	0.239749	0.124117	0.196646		0.187629	0.143068	0.140764	0.156532		5.475	0.163324	0.175268	0.160807	0.166466		0.277201	0.275716	0.211252	0.254723
22	0.17893	0.260711	0.142975	0.194205		0.161185	0.139435	0.147177	0.149266		0.232192	0.238453	0.123179	0.195815		0.186596	0.142552	0.140015	0.155777		5.5	0.162057	0.174964	0.160519	0.165847		0.276283	0.27378	0.210468	0.25351
22.1	0.177371	0.259561	0.142482	0.193138		0.160196	0.13855	0.145917	0.148221		0.231228	0.237925	0.122958	0.195268		0.18542	0.141553	0.139225	0.154789		5.525	0.161311	0.174836	0.1605	0.165549		0.274459	0.273348	0.209999	0.252602
22.2	0.176491	0.258655	0.141504	0.192217		0.159276	0.137788	0.144769	0.147278		0.23049	0.237175	0.122013	0.194452		0.184346	0.140965	0.13797	0.153833		5.55	0.16298	0.174467	0.16023	0.165893		0.272845	0.271955	0.209322	0.251374
22.3	0.174797	0.257614	0.14071	0.19104		0.158061	0.136753	0.144306	0.146373		0.229547	0.235299	0.121361	0.193283		0.183941	0.140181	0.137464	0.153258		5.575	0.161439	0.174484	0.159834	0.165252		0.272453	0.270996	0.208801	0.25075
22.4	0.175136	0.256381	0.139656	0.190391		0.156827	0.136057	0.143352	0.145412		0.22766	0.234651	0.120681	0.19226		0.182259	0.138916	0.136796	0.15205		5.6	0.16113	0.174314	0.15977	0.165071		0.271324	0.27057	0.208185	0.250026
22.5	0.173848	0.255231	0.13887	0.189316		0.155799	0.135794	0.142166	0.144586		0.226326	0.233696	0.120018	0.191298		0.181549	0.137793	0.136169	0.151217		5.625	0.161228	0.173712	0.159314	0.164751		0.271068	0.269278	0.207397	0.249247
22.6	0.173374	0.254081	0.137733	0.188396		0.154878	0.134702	0.140925	0.143502		0.225137	0.232196	0.11962	0.190279		0.180232	0.136545	0.13544	0.150113		5.65	0.16114	0.174155	0.159609	0.164968		0.269869	0.268747	0.206905	0.248507
22.7	0.171341	0.252805	0.137031	0.187059		0.153732	0.133921	0.139796	0.142483		0.22366	0.231702	0.119049	0.18947		0.179381	0.135975	0.134144	0.149222		5.675	0.160258	0.173153	0.158968	0.164127		0.268477	0.267527	0.206308	0.247437
22.8	0.171477	0.251504	0.135985	0.186322		0.152763	0.133187	0.13911	0.141687		0.222676	0.230321	0.118057	0.188342		0.178043	0.135297	0.13378	0.148434		5.7	0.161255	0.173335	0.159266	0.164619		0.267312	0.266592	0.205794	0.246566
22.9	0.170867	0.250254	0.13494	0.185354		0.152214	0.132105	0.138212	0.140844		0.222655	0.229298	0.117507	0.187781		0.177476	0.134478	0.133132	0.147749		5.725	0.160362	0.173483	0.158733	0.164193		0.266235	0.265562	0.205106	0.245634
23	0.170257	0.248819	0.134372	0.184483		0.150843	0.131136	0.137387	0.139789		0.221589	0.229383	0.116596	0.187176		0.1763	0.133836	0.132282	0.146871		5.75	0.160625	0.17302	0.158217	0.163954		0.265385	0.264897	0.204843	0.245041
23.1	0.169512	0.247946	0.133143	0.183534		0.150109	0.130562	0.136443	0.139038		0.219989	0.228241	0.115998	0.186092		0.175125	0.132963	0.131978	0.146083		5.775	0.160685	0.172694	0.158549	0.163976		0.264925	0.263728	0.204083	0.244245
23.2	0.168699	0.246334	0.132265	0.182433		0.148591	0.129894	0.135767	0.138084		0.218594	0.226757	0.115549	0.185001		0.173888	0.13241	0.131655	0.145386		5.8	0.159618	0.173037	0.158286	0.163647		0.264156	0.2631	0.203484	0.24358
23.3	0.166938	0.245411	0.131019	0.181123		0.147983	0.128445	0.13485	0.137093		0.218861	0.226519	0.115053	0.184819		0.172652	0.132018	0.131209	0.144708		5.825	0.159474	0.172421	0.158055	0.163317		0.262452	0.261583	0.202759	0.242265
23.4	0.167073	0.244236	0.130325	0.180545		0.146896	0.128003	0.134155	0.136351		0.217384	0.225172	0.114526	0.183724		0.171618	0.13102	0.129792	0.143565		5.85	0.159326	0.171978	0.157836	0.163047		0.261898	0.260271	0.202019	0.241396
23.5	0.164905	0.24312	0.129539	0.179188		0.14626	0.126996	0.133183	0.135479		0.215866	0.224387	0.114077	0.182844		0.170139	0.130984	0.128962	0.142816		5.875	0.159164	0.171266	0.158109	0.162846		0.261234	0.259173	0.202019	0.240809
23.6	0.164566	0.241836	0.128561	0.178321		0.14532	0.126262	0.132164	0.134582		0.215538	0.22333	0.113394	0.182133		0.169632	0.130057	0.128719	0.142241		5.9	0.158483	0.171419	0.157424	0.162442		0.260629	0.258989	0.201177	0.240265
23.7	0.163279	0.240896	0.128034	0.177403		0.144712	0.125312	0.131182	0.133735		0.215374	0.223313	0.113041	0.181954		0.168477	0.129327	0.12789	0.141343		5.925	0.158242	0.171462	0.157249	0.162318		0.258949	0.257816	0.200843	0.239203
23.8	0.162398	0.239562	0.12693	0.176297		0.144115	0.124578	0.130673	0.133122		0.2148	0.221728	0.112793	0.181138		0.16793	0.128186	0.127384	0.140594		5.95	0.158505	0.171243	0.156885	0.162211		0.258273	0.256832	0.200397	0.238501
23.9	0.162805	0.238596	0.125843	0.175748		0.143116	0.124117	0.129524	0.132252		0.213364	0.221063	0.112161	0.180259		0.166856	0.12815	0.126554	0.139974		5.975	0.158256	0.171499	0.156694	0.16215		0.256837	0.256477	0.19991	0.237741
24	0.159688	0.23769	0.124698	0.174025		0.142225	0.123336	0.128515	0.131358		0.211888	0.220006	0.111236	0.179125		0.166228	0.127473	0.125946	0.139335		6	0.157631	0.170633	0.157024	0.161763		0.256216	0.255474	0.199204	0.236965
24.1	0.159485	0.236591	0.124397	0.173491		0.1415	0.122367	0.127802	0.130556		0.211108	0.219631	0.110057	0.178347		0.165336	0.126724	0.125177	0.138534		6.025	0.157752	0.170449	0.156666	0.161622		0.255006	0.25414	0.198611	0.235919
24.2	0.158469	0.235483	0.123803	0.172585		0.140873	0.121708	0.127209	0.12993		0.211108	0.218403	0.109493	0.177714		0.164829	0.126047	0.124388	0.137875		6.05	0.15717	0.170806	0.156345	0.161441		0.254104	0.253316	0.198282	0.235234
24.3	0.158062	0.234316	0.123168	0.171849		0.139923	0.120899	0.126588	0.129137		0.208996	0.217397	0.10936	0.176693		0.163816	0.125637	0.12372	0.137191		6.075	0.156946	0.170159	0.155829	0.160978		0.25391	0.252438	0.197539	0.234629
24.4	0.157927	0.23304	0.122407	0.171125		0.138826	0.120344	0.125653	0.128274		0.208462	0.215795	0.108721	0.175745		0.162559	0.124568	0.122748	0.136093		6.1	0.156854	0.1701	0.155457	0.160804		0.252767	0.251798	0.196892	0.233819
24.5	0.154539	0.232277	0.121738	0.169518		0.137729	0.119911	0.125005	0.127548		0.206637	0.215061	0.108521	0.17488		0.161749	0.124265	0.122768	0.135731		6.125	0.157005	0.170102	0.156076	0.161061		0.251875	0.251152	0.196309	0.233112
24.6	0.155488	0.231177	0.121103	0.169256		0.13677	0.119327	0.124254	0.126784		0.206083	0.214703	0.107708	0.174304		0.160573	0.123374	0.122424	0.134924		6.15	0.156391	0.169569	0.155749	0.16057		0.250586	0.250471	0.195918	0.232325
24.7	0.155081	0.230481	0.120208	0.16859		0.135516	0.118688	0.123449	0.125884		0.205509	0.214618	0.106899	0.173819		0.160208	0.122696	0.122141	0.134472		6.175	0.157171	0.169191	0.155308	0.160557		0.249349	0.249203	0.195471	0.231341
24.8	0.153659	0.229213	0.119238	0.16737		0.134644	0.118001	0.122698	0.125115		0.204053	0.213868	0.106284	0.17291		0.158992	0.122233	0.121027	0.133562		6.2	0.156126	0.16918	0.15515	0.160152		0.24959	0.248595	0.19492	0.231035
24.9	0.15332	0.228173	0.118653	0.166715		0.134106	0.117474	0.121819	0.124466		0.204196	0.212879	0.106135	0.17255		0.158161	0.121787	0.12038	0.132929		6.225	0.156762	0.168803	0.155102	0.160222		0.247886	0.248171	0.194339	0.230132
25	0.152371	0.227191	0.117875	0.165812		0.133489	0.116759	0.120948	0.123732		0.202822	0.212214	0.105516	0.171694		0.157594	0.121003	0.119226	0.132096		6.25	0.155711	0.168814	0.155258	0.159927		0.246581	0.246671	0.193888	0.229047
25.1	0.151897	0.226167	0.117399	0.165154		0.132813	0.116119	0.119976	0.122969		0.202063	0.21039	0.105153	0.170699		0.156398	0.120005	0.119185	0.13134		6.275	0.155272	0.168567	0.154661	0.1595		0.245934	0.245738	0.193316	0.228329
25.2	0.151084	0.224639	0.11673	0.164151		0.131794	0.115357	0.119161	0.122104		0.201427	0.209657	0.104826	0.170138		0.15504	0.119702	0.118295	0.130513		6.3	0.156242	0.168275	0.154798	0.159772		0.245576	0.245337	0.19298	0.227964
25.3	0.150542	0.223607	0.115551	0.163233		0.131315	0.114256	0.118216	0.121262		0.200976	0.208873	0.103929	0.169412		0.154351	0.119114	0.118072	0.13001		6.325	0.156399	0.168068	0.154018	0.159495		0.245442	0.244477	0.192436	0.227452
25.4	0.149051	0.222776	0.11469	0.162172		0.130237	0.113635	0.117503	0.120458		0.199787	0.207884	0.103586	0.168592		0.153054	0.118846	0.117384	0.12928		6.35	0.155526	0.168249	0.154011	0.159262		0.243972	0.243512	0.191982	0.226489
25.5	0.15	0.221819	0.114029	0.161949		0.129219	0.11292	0.117049	0.119729		0.199459	0.205889	0.103052	0.167604		0.152912	0.118134	0.116574	0.128718		6.375	0.15529	0.167559	0.154237	0.159029		0.243058	0.242396	0.191465	0.22564
25.6	0.148374	0.220972	0.113477	0.160941		0.128465	0.112139	0.116012	0.118872		0.197797	0.205343	0.102964	0.166893		0.152102	0.117866	0.11623	0.128253		6.4	0.155001	0.167574	0.153574	0.158716		0.242294	0.241928	0.190947	0.225056
25.7	0.147832	0.219755	0.11316	0.160249		0.127573	0.111311	0.115447	0.11811		0.19669	0.204917	0.10205	0.166094		0.150764	0.117028	0.116048	0.127465		6.425	0.155408	0.16712	0.153558	0.158695		0.242154	0.241445	0.190576	0.224725
25.8	0.147425	0.218882	0.112549	0.159619		0.126633	0.110633	0.114965	0.11741		0.195295	0.204542	0.101764	0.165451		0.149447	0.11644	0.115582	0.126684		6.45	0.154175	0.167378	0.153422	0.158325		0.240836	0.240314	0.19019	0.22378
25.9	0.145664	0.217917	0.11132	0.1583		0.126202	0.10989	0.113993	0.116695		0.194413	0.203536	0.101523	0.164753		0.148494	0.116244	0.115097	0.126154		6.475	0.153648	0.167012	0.153602	0.158087		0.239752	0.2401	0.189416	0.223089
26	0.145325	0.217086	0.110041	0.157484		0.125526	0.109373	0.113085	0.115995		0.19427	0.203263	0.100561	0.164274		0.148292	0.115407	0.114591	0.125625		6.5	0.15309	0.167349	0.153108	0.157849		0.239296	0.239213	0.189088	0.222532
26.1	0.143089	0.215861	0.109698	0.156216		0.124988	0.108704	0.112983	0.115558		0.192362	0.202701	0.100259	0.163409		0.147866	0.115157	0.113639	0.125095		6.525	0.153756	0.166535	0.153241	0.157844		0.23763	0.238303	0.188629	0.221521
26.2	0.143089	0.214761	0.10882	0.155557		0.124322	0.108168	0.112224	0.114904		0.193162	0.202121	0.100102	0.163384		0.146508	0.114355	0.113214	0.124236		6.55	0.154527	0.166413	0.152381	0.157774		0.237867	0.237491	0.187961	0.221106
26.3	0.14336	0.213871	0.108461	0.155231		0.123685	0.107613	0.111427	0.114242		0.192342	0.201405	0.0998848	0.162813		0.14588	0.113482	0.112668	0.123545		6.575	0.153458	0.166237	0.152083	0.157259		0.23675	0.236822	0.187639	0.220404
26.4	0.142209	0.2132	0.107842	0.154417		0.122892	0.107199	0.110918	0.11367		0.19107	0.200552	0.0991371	0.161875		0.145434	0.113393	0.112546	0.123332		6.6	0.152845	0.165973	0.152159	0.156992		0.235788	0.235253	0.187111	0.219384
26.5	0.140989	0.212168	0.107967	0.153708		0.122157	0.106785	0.110279	0.113074		0.19027	0.200263	0.0993512	0.161614		0.14438	0.11259	0.111635	0.122415		6.625	0.152759	0.165437	0.152334	0.156843		0.236007	0.235296	0.186932	0.219412
26.6	0.14065	0.211261	0.107825	0.153245		0.121531	0.10607	0.109584	0.112395		0.190209	0.199768	0.0986715	0.161181		0.143711	0.112359	0.111797	0.12217		6.65	0.152728	0.165533	0.152489	0.156917		0.233747	0.234416	0.186562	0.218242
26.7	0.140108	0.210388	0.106763	0.15242		0.120953	0.105599	0.108991	0.111848		0.189101	0.198728	0.0981821	0.160316		0.143103	0.111753	0.111412	0.121634		6.675	0.153318	0.165025	0.151823	0.156722		0.233707	0.233907	0.185935	0.217849
26.8	0.140041	0.209499	0.105609	0.151716		0.119944	0.105185	0.108436	0.111188		0.187788	0.197688	0.0976451	0.159374		0.142414	0.111165	0.110542	0.120923		6.7	0.153177	0.165048	0.151868	0.156697		0.232309	0.232904	0.185854	0.217022
26.9	0.139431	0.208257	0.105074	0.150921		0.119591	0.104499	0.107435	0.110508		0.186948	0.195966	0.0970911	0.158324		0.141482	0.111111	0.109935	0.120413		6.725	0.152595	0.165218	0.151725	0.156513		0.231482	0.232309	0.185093	0.216295
27	0.137466	0.20725	0.104029	0.149582		0.118602	0.103727	0.106592	0.109641		0.185696	0.195335	0.0970198	0.157709		0.141401	0.110541	0.109631	0.120084		6.75	0.15209	0.164784	0.151411	0.156095		0.2319	0.231461	0.184655	0.216005
27.1	0.138753	0.206477	0.103502	0.149577		0.117554	0.102843	0.105638	0.108678		0.184466	0.194159	0.0962891	0.156675		0.140002	0.109935	0.108983	0.119212		6.775	0.152469	0.16492	0.151478	0.156289		0.230745	0.231189	0.184099	0.215344
27.2	0.136653	0.205689	0.103176	0.148506		0.1168	0.102109	0.10537	0.108093		0.183933	0.193119	0.0961633	0.156107		0.139881	0.109721	0.108761	0.119025		6.8	0.151552	0.164937	0.15091	0.1558		0.229936	0.230064	0.183975	0.214658
27.3	0.135976	0.204723	0.102884	0.147861		0.116095	0.101535	0.105212	0.107614		0.183871	0.193562	0.0954258	0.155984		0.138867	0.109008	0.10787	0.11816		6.825	0.151841	0.164789	0.150729	0.155787		0.229357	0.229507	0.183665	0.214176
27.4	0.135095	0.204136	0.102892	0.147374		0.115223	0.101365	0.104777	0.107122		0.182866	0.193136	0.0948515	0.155336		0.137915	0.108438	0.108174	0.117746		6.85	0.151067	0.164174	0.150364	0.155202		0.228493	0.2285	0.183113	0.213369
27.5	0.135163	0.202944	0.10214	0.146749		0.114655	0.100631	0.103805	0.106364		0.183051	0.192181	0.0942737	0.154849		0.137104	0.1076	0.107162	0.116861		6.875	0.151479	0.164142	0.150215	0.155279		0.227134	0.2281	0.182862	0.212699
27.6	0.134959	0.202055	0.101028	0.146014		0.114038	0.0999915	0.103443	0.105824		0.180548	0.191874	0.0938149	0.153844		0.136658	0.107564	0.10706	0.116674		6.9	0.150317	0.163961	0.150599	0.154959		0.225494	0.227456	0.182217	0.211722
27.7	0.134621	0.201157	0.100108	0.145295		0.113715	0.0993423	0.10274	0.105266		0.179502	0.191397	0.0932507	0.153169		0.135544	0.107065	0.106818	0.116061		6.925	0.150312	0.164049	0.150374	0.154912		0.2257	0.227276	0.181824	0.2116
27.8	0.134282	0.200342	0.0991881	0.144604		0.112687	0.0984202	0.102202	0.104436		0.178067	0.190561	0.0931454	0.152416		0.135341	0.106744	0.106676	0.115835		6.95	0.150183	0.163898	0.150114	0.154732		0.225131	0.226383	0.181333	0.210949
27.9	0.132927	0.199646	0.0984858	0.143686		0.112315	0.0977616	0.101693	0.103923		0.177185	0.189453	0.0924283	0.151513		0.135442	0.106245	0.105684	0.11537		6.975	0.149463	0.163756	0.150288	0.154503		0.224368	0.224874	0.181144	0.210129
28	0.132995	0.198765	0.0978587	0.143206		0.111639	0.0974322	0.101193	0.103421		0.177164	0.188856	0.0924045	0.151288		0.134611	0.105693	0.105421	0.114821		7	0.150945	0.163492	0.149575	0.154671		0.224509	0.224448	0.180529	0.209828
28.1	0.132453	0.198337	0.0975159	0.142769		0.111198	0.0968583	0.100832	0.102963		0.177041	0.187595	0.0915344	0.150499		0.134064	0.105283	0.104712	0.114272		7.025	0.150378	0.163424	0.149692	0.154498		0.223462	0.22393	0.18009	0.209161
28.2	0.132453	0.197313	0.0969557	0.142241		0.110581	0.0966136	0.100767	0.102654		0.176816	0.187117	0.0915344	0.150264		0.133639	0.104516	0.104814	0.113891		7.05	0.149984	0.162999	0.149724	0.154235		0.222841	0.223037	0.179601	0.208493
28.3	0.131165	0.196473	0.0967718	0.14147		0.110131	0.0966136	0.0994147	0.102053		0.176528	0.186333	0.0909635	0.149701		0.132402	0.104231	0.103963	0.113122		7.075	0.149585	0.162862	0.149454	0.153967		0.221898	0.222521	0.179266	0.207895
28.4	0.130014	0.195256	0.0960778	0.140449		0.109964	0.095795	0.0990535	0.101604		0.175831	0.185054	0.0908241	0.148996		0.132179	0.10391	0.103741	0.112864		7.1	0.150002	0.163107	0.149524	0.154211		0.220435	0.221727	0.179035	0.207066
28.5	0.130285	0.194535	0.0954173	0.140079		0.109367	0.095588	0.0988867	0.101281		0.175585	0.184424	0.0899677	0.148398		0.131896	0.103287	0.103862	0.112586		7.125	0.149906	0.163217	0.149584	0.154236		0.220732	0.220659	0.178603	0.206664
28.6	0.129336	0.193452	0.0945561	0.139115		0.10872	0.0957386	0.0982014	0.100887		0.174129	0.184304	0.0894715	0.147754		0.130619	0.102895	0.10368	0.111979		7.15	0.149123	0.162249	0.149083	0.153485		0.219293	0.220806	0.178199	0.206099
28.7	0.129675	0.192445	0.0942718	0.138797		0.107672	0.0949858	0.0980532	0.100237		0.172714	0.184645	0.0891044	0.147329		0.129889	0.10236	0.103235	0.111411		7.175	0.149373	0.162318	0.148785	0.153492		0.219034	0.220421	0.177696	0.205717
28.8	0.12771	0.191522	0.0941798	0.137804		0.10685	0.0946189	0.0973956	0.0996214		0.171873	0.183656	0.0890059	0.146699		0.129383	0.102271	0.102506	0.110985		7.2	0.14908	0.161963	0.148557	0.1532		0.218216	0.219359	0.177262	0.204946
28.9	0.128117	0.190775	0.0938955	0.137596		0.106086	0.0938567	0.0958674	0.0986033		0.170847	0.184526	0.0886048	0.146563		0.128146	0.101112	0.10204	0.110023		7.225	0.148569	0.162147	0.148731	0.153149		0.217281	0.218472	0.176862	0.204205
29	0.126694	0.189877	0.0937116	0.136761		0.105567	0.0936497	0.0956915	0.0983027		0.170847	0.184151	0.0884043	0.146359		0.127842	0.100631	0.101555	0.109596		7.25	0.149088	0.1619	0.148655	0.153214		0.21671	0.218597	0.176619	0.203976
29.1	0.125949	0.189272	0.0931932	0.136138		0.104783	0.0932451	0.0949598	0.0976627		0.170129	0.182685	0.0880577	0.145509		0.127214	0.101273	0.100887	0.109416		7.275	0.148491	0.161299	0.148208	0.152666		0.215681	0.217957	0.176194	0.203277
29.2	0.125881	0.188324	0.0924574	0.135554		0.104274	0.0926618	0.0945893	0.097175		0.168407	0.18277	0.0877756	0.144934		0.126221	0.100453	0.100381	0.108641		7.3	0.148266	0.16146	0.147751	0.152493		0.216237	0.216784	0.175914	0.202978
29.3	0.125407	0.187552	0.0917634	0.134907		0.104068	0.0920502	0.0938762	0.0966649		0.168058	0.182395	0.0873813	0.14456		0.125958	0.100542	0.100198	0.108531		7.325	0.147993	0.160952	0.148154	0.152367		0.214993	0.216164	0.175486	0.202214
29.4	0.124255	0.186654	0.0912869	0.134065		0.103784	0.0914574	0.0935613	0.0962677		0.16773	0.1819	0.0868104	0.144087		0.124904	0.100203	0.100016	0.108014		7.35	0.147958	0.161137	0.147773	0.152289		0.21437	0.215402	0.175086	0.201619
29.5	0.123509	0.185907	0.0904926	0.133303		0.102776	0.090827	0.0933298	0.0956441		0.167648	0.181304	0.0860627	0.143588		0.124296	0.0994546	0.0993684	0.107343		7.375	0.148706	0.160481	0.147881	0.152356		0.213155	0.215139	0.174586	0.20096
29.6	0.124255	0.185194	0.0903922	0.13328		0.101953	0.089999	0.0925332	0.0948284		0.167525	0.180792	0.0863618	0.143477		0.123789	0.0989734	0.0988017	0.106826		7.4	0.148182	0.161219	0.14752	0.152307		0.21281	0.214498	0.174536	0.200615
29.7	0.123035	0.184304	0.0898237	0.132388		0.101111	0.0894626	0.0918757	0.0941496		0.16695	0.180264	0.0862088	0.143068		0.123363	0.0987238	0.0986802	0.106561		7.425	0.147359	0.1606	0.147383	0.151781		0.213536	0.213683	0.173821	0.200347
29.8	0.122425	0.183473	0.0889792	0.131626		0.100758	0.0893497	0.0912181	0.0937753		0.166356	0.179292	0.0855699	0.142325		0.122877	0.098207	0.0982551	0.106083		7.45	0.14798	0.160311	0.147453	0.151915		0.211569	0.213253	0.173484	0.199435
29.9	0.122493	0.183221	0.0883855	0.131366		0.0998766	0.0894532	0.0908384	0.0933894		0.165104	0.178831	0.0857194	0.141848		0.122249	0.0973158	0.0980527	0.105496		7.475	0.147414	0.160039	0.147314	0.151589		0.210903	0.212698	0.173522	0.199041
30	0.120596	0.18255	0.0883019	0.130483		0.0995926	0.088437	0.0906068	0.0928788		0.16451	0.178371	0.0849547	0.141241		0.122168	0.0971197	0.0976074	0.105257		7.5	0.146814	0.160212	0.147149	0.151391		0.210631	0.212082	0.173035	0.198583
30.1	0.120393	0.181476	0.0877167	0.129862		0.0989168	0.0883147	0.0904957	0.0925757		0.163771	0.177314	0.0848018	0.140597		0.121357	0.0964424	0.0975264	0.104727		7.525	0.14624	0.159241	0.146676	0.150719		0.208705	0.211239	0.172386	0.197443
30.2	0.120325	0.180745	0.087307	0.129459		0.098574	0.0880324	0.0898844	0.0921636		0.163095	0.176427	0.0841323	0.139849		0.120648	0.0959077	0.0975264	0.104307		7.55	0.147367	0.159723	0.146581	0.151224		0.209841	0.210849	0.172224	0.197638
30.3	0.11897	0.179839	0.087123	0.128644		0.0979766	0.0871292	0.0892731	0.0914596		0.162459	0.175251	0.0836293	0.13907		0.120242	0.0956404	0.0969799	0.103907		7.575	0.147087	0.15938	0.146381	0.150949		0.208323	0.210211	0.171545	0.196693
30.4	0.118022	0.179042	0.0864792	0.127848		0.0982215	0.0870068	0.0884489	0.0912257		0.163279	0.174399	0.0834967	0.138963		0.119513	0.0951592	0.0963321	0.103294		7.6	0.146566	0.159315	0.146572	0.150817		0.208101	0.209654	0.171535	0.19643
30.5	0.117683	0.178765	0.0857852	0.127411		0.0975653	0.0866493	0.0875412	0.0905853		0.162397	0.173768	0.0835579	0.138503		0.119006	0.0951057	0.0956641	0.1029		7.625	0.145697	0.159377	0.145801	0.150292		0.206954	0.209367	0.171251	0.195858
30.6	0.117344	0.177875	0.0854341	0.126884		0.0969777	0.0858683	0.0866336	0.0898265		0.162049	0.173018	0.0829394	0.137917		0.118135	0.0950344	0.0953403	0.102493		7.65	0.145601	0.158991	0.146159	0.15025		0.206928	0.208606	0.17088	0.195471
30.7	0.117818	0.177271	0.0846983	0.126596		0.0966545	0.0853602	0.0859112	0.0893086		0.161474	0.17133	0.0830074	0.137177		0.117466	0.0944106	0.0950569	0.101963		7.675	0.146356	0.158909	0.146096	0.150454		0.206788	0.208279	0.170556	0.195208
30.8	0.117344	0.176583	0.0846983	0.126208		0.0963215	0.085332	0.0859575	0.0892036		0.160285	0.170477	0.0828476	0.136471		0.116777	0.0938402	0.0948545	0.101472		7.7	0.145501	0.159042	0.144735	0.14976		0.20595	0.207397	0.169977	0.194441
30.9	0.115176	0.175995	0.0841381	0.125103		0.0957338	0.0845887	0.0858	0.0887075		0.160141	0.170631	0.082467	0.136348		0.116615	0.0938581	0.094652	0.101363		7.725	0.145677	0.15808	0.145677	0.149811		0.204568	0.2069	0.169919	0.193796
31	0.115176	0.175072	0.0842217	0.124823		0.095107	0.0844381	0.0856426	0.0883959		0.159854	0.170528	0.0819708	0.136053		0.115926	0.0932877	0.0945103	0.100891		7.75	0.144758	0.158165	0.145585	0.149503		0.204187	0.206389	0.169326	0.193301
31.1	0.115989	0.17456	0.083904	0.124818		0.0942452	0.0840147	0.0853277	0.0878625		0.159382	0.169437	0.0817125	0.135438		0.115865	0.0933412	0.0943889	0.100852		7.775	0.145572	0.158429	0.145303	0.149768		0.203939	0.205886	0.169028	0.192951
31.2	0.115176	0.173779	0.0831933	0.124049		0.0941081	0.0835066	0.085198	0.0876042		0.158705	0.168141	0.0813013	0.134637		0.115561	0.0930025	0.0941055	0.100542		7.8	0.145349	0.1585	0.144967	0.149605		0.202524	0.205437	0.168706	0.192222
31.3	0.11416	0.173226	0.0829759	0.123454		0.0934715	0.083055	0.0846979	0.0870748		0.157967	0.16792	0.0808594	0.134186		0.114608	0.0926104	0.0948342	0.100329		7.825	0.146001	0.158009	0.145186	0.149732		0.202851	0.205006	0.16851	0.192122
31.4	0.114228	0.172453	0.0822234	0.122968		0.0929035	0.0824434	0.0839662	0.0864377		0.156367	0.166965	0.0807609	0.133345		0.114325	0.0923431	0.0937209	0.0997869		7.85	0.144446	0.157972	0.14426	0.148893		0.201604	0.204325	0.168059	0.191329
31.5	0.114499	0.172084	0.0816883	0.122757		0.0924529	0.0824904	0.0831975	0.086047		0.155526	0.166829	0.0806079	0.132996		0.114183	0.0922005	0.0930124	0.099464		7.875	0.144579	0.157652	0.14431	0.148847		0.201801	0.203845	0.167911	0.191186
31.6	0.114837	0.171077	0.0810696	0.122328		0.0921004	0.0821235	0.0831882	0.085804		0.155855	0.166454	0.0798908	0.132706		0.113392	0.091345	0.0930934	0.098928		7.9	0.14521	0.157748	0.14451	0.149156		0.201136	0.203045	0.167548	0.190576
31.7	0.115244	0.170154	0.0805762	0.121991		0.0914834	0.0816624	0.082966	0.0853706		0.156326	0.165465	0.0798569	0.132483		0.112845	0.0912737	0.0925266	0.098547		7.925	0.144591	0.157314	0.14457	0.148825		0.201227	0.203045	0.167286	0.19052
31.8	0.113211	0.169701	0.0798321	0.120915		0.0914344	0.0810508	0.0827992	0.0850948		0.154562	0.165789	0.0796869	0.13202		0.112906	0.0905964	0.0925671	0.0983339		7.95	0.143468	0.15711	0.14465	0.148409		0.200673	0.202198	0.166974	0.189948
31.9	0.112195	0.169147	0.0797401	0.120361		0.0907097	0.080618	0.0824195	0.0845824		0.153865	0.165806	0.0791703	0.131639		0.111994	0.0909885	0.0919598	0.0979916		7.975	0.143969	0.157013	0.143977	0.14832		0.199575	0.202025	0.166576	0.189392
32	0.113211	0.168215	0.0792385	0.120221		0.0902885	0.0803828	0.0818546	0.0841753		0.154009	0.164919	0.0786945	0.1312		0.111609	0.0906677	0.0912109	0.0975137		8	0.14409	0.156823	0.144142	0.148352		0.198533	0.200633	0.16629	0.188486
32.1	0.11145	0.167443	0.0790044	0.119299		0.0894854	0.079837	0.0815119	0.0836114		0.152532	0.164442	0.0786809	0.130594		0.110899	0.090739	0.0911502	0.0972942		8.025	0.143182	0.157164	0.143606	0.147984		0.198305	0.20046	0.165894	0.18822
32.2	0.11206	0.167023	0.0783773	0.119153		0.0889566	0.0794795	0.0811507	0.0831956		0.152183	0.164442	0.0780182	0.130257		0.111041	0.0901151	0.0902797	0.0968356		8.05	0.143167	0.156644	0.143476	0.147762		0.1968	0.199794	0.165811	0.187468
32.3	0.111247	0.166545	0.07821	0.118667		0.0886628	0.0792913	0.0804838	0.0828126		0.151486	0.1648	0.0778789	0.130129		0.110859	0.0893487	0.0904012	0.0965386		8.075	0.142928	0.156392	0.143353	0.147557		0.196926	0.20012	0.165534	0.187527
32.4	0.111043	0.166125	0.07821	0.118459		0.0882416	0.0792819	0.0800393	0.0825209		0.150666	0.163709	0.0778687	0.1295		0.109825	0.0893131	0.0901178	0.0961059		8.1	0.143225	0.15625	0.142671	0.147382		0.195546	0.198858	0.165028	0.186477
32.5	0.111518	0.165303	0.0780261	0.118282		0.087654	0.079009	0.0796503	0.0821044		0.151527	0.163794	0.0773657	0.129605		0.109623	0.0888853	0.0898749	0.0958088		8.125	0.143621	0.156244	0.142798	0.147554		0.195739	0.199017	0.164744	0.1865
32.6	0.110569	0.164313	0.0778004	0.117561		0.0873406	0.0785668	0.0789279	0.0816118		0.150994	0.16168	0.0773963	0.128713		0.108771	0.0883328	0.0897737	0.0953051		8.15	0.14286	0.155815	0.142718	0.147131		0.19396	0.198395	0.164334	0.185563
32.7	0.11023	0.163414	0.0772485	0.116964		0.087037	0.0784633	0.0787704	0.0814236		0.150563	0.161458	0.0769646	0.128356		0.108589	0.0884754	0.0893486	0.0951631		8.175	0.142566	0.155918	0.142782	0.147088		0.194475	0.197806	0.164343	0.185541
32.8	0.109621	0.162693	0.0764793	0.116264		0.0866942	0.0777294	0.0784185	0.0809474		0.149148	0.160435	0.0764209	0.127388		0.107758	0.0878872	0.0893284	0.0946787		8.2	0.142673	0.15592	0.142921	0.147171		0.193222	0.197003	0.163883	0.184703
32.9	0.108604	0.161501	0.0759275	0.115344		0.0860968	0.0775788	0.0779739	0.0805498		0.148574	0.159872	0.0763529	0.126997		0.107576	0.0877981	0.0881746	0.0942202		8.225	0.142371	0.155404	0.142814	0.146863		0.19311	0.196293	0.163669	0.184357
33	0.108401	0.161325	0.0751582	0.114961		0.0858715	0.0772307	0.077622	0.0802414		0.14724	0.159361	0.0765534	0.126496		0.107454	0.0868713	0.0882555	0.0938715		8.25	0.142749	0.155617	0.142443	0.146936		0.192671	0.19602	0.163283	0.183991
33.1	0.107385	0.16093	0.0749659	0.114427		0.0855092	0.0769108	0.0771682	0.0798627		0.145969	0.158696	0.0762373	0.125777		0.10715	0.0871921	0.0877697	0.0937359		8.275	0.142365	0.155117	0.142769	0.14675		0.191763	0.196111	0.163258	0.183711
33.2	0.107656	0.160418	0.0747067	0.11426		0.0853035	0.0763462	0.0769551	0.079535		0.145497	0.158099	0.0762815	0.125444		0.107008	0.0868	0.0876483	0.0935098		8.3	0.142544	0.154879	0.142211	0.146545		0.191389	0.194883	0.162638	0.18297
33.3	0.106504	0.160099	0.0745562	0.11372		0.0850293	0.0756688	0.0767699	0.079156		0.145784	0.157929	0.0757072	0.125264		0.106157	0.0864079	0.087709	0.0931159		8.325	0.14166	0.154936	0.142087	0.146228		0.190696	0.194251	0.162418	0.182455
33.4	0.105285	0.159151	0.0738873	0.112774		0.0846865	0.0754618	0.0761864	0.0787782		0.145353	0.157844	0.0752042	0.12493		0.106035	0.0860158	0.086535	0.0925605		8.35	0.141644	0.154447	0.141545	0.145879		0.190341	0.194178	0.162191	0.182237
33.5	0.104946	0.158782	0.0737703	0.112499		0.0845396	0.0750666	0.0760382	0.0785481		0.145702	0.157639	0.0754489	0.125047		0.105711	0.0858197	0.0864337	0.0923539		8.375	0.141691	0.155049	0.142075	0.146271		0.190077	0.193756	0.161801	0.181878
33.6	0.105014	0.15827	0.0735947	0.112293		0.0841478	0.0746432	0.0753992	0.0780634		0.144882	0.157247	0.074708	0.124406		0.105144	0.0859266	0.0862516	0.0921537		8.4	0.141511	0.154794	0.141459	0.145921		0.190704	0.192694	0.161816	0.181738
33.7	0.104201	0.157607	0.0734776	0.111762		0.0833154	0.0744456	0.0756029	0.077788		0.144718	0.155678	0.0745278	0.12374		0.105245	0.0853385	0.0858467	0.0918437		8.425	0.140729	0.154484	0.141507	0.145573		0.188484	0.192324	0.161499	0.180769
33.8	0.104878	0.156851	0.0730429	0.111591		0.0829138	0.0738904	0.0755011	0.0774351		0.143467	0.154894	0.0741234	0.122954		0.104049	0.0850355	0.0856038	0.0912754		8.45	0.140828	0.154155	0.141196	0.145393		0.188261	0.191268	0.161069	0.180199
33.9	0.104946	0.156121	0.0725746	0.111214		0.0826494	0.073834	0.0751769	0.0772201		0.142933	0.154519	0.0736952	0.122513		0.103725	0.0846255	0.0854419	0.0909719		8.475	0.14174	0.154252	0.141669	0.145887		0.187468	0.19165	0.160934	0.180017
34	0.104743	0.155475	0.0721566	0.110792		0.0816406	0.073213	0.0749546	0.0766027		0.142687	0.154007	0.0735423	0.122207		0.102752	0.0842512	0.0855836	0.0905715		8.5	0.140412	0.153763	0.141745	0.145307		0.187201	0.190626	0.160376	0.179401
34.1	0.104743	0.154862	0.072073	0.110559		0.0814839	0.0730154	0.0743619	0.0762871		0.141559	0.153649	0.0733112	0.121668		0.101962	0.0840374	0.0851383	0.0901001		8.525	0.140838	0.153622	0.141348	0.145269		0.187364	0.191012	0.160319	0.179565
34.2	0.103659	0.154124	0.0716884	0.109824		0.0811705	0.0727237	0.073658	0.0758507		0.140718	0.152644	0.0729747	0.120947		0.101921	0.0840552	0.0848549	0.0900032		8.55	0.140725	0.153718	0.141066	0.14517		0.186479	0.190008	0.16	0.178829
34.3	0.104268	0.153528	0.0715462	0.109781		0.0809747	0.072686	0.072667	0.0754426		0.141046	0.152592	0.0726824	0.120922		0.100543	0.0835561	0.0847941	0.0893639		8.575	0.140093	0.153829	0.140695	0.144872		0.185872	0.189688	0.159454	0.178338
34.4	0.102913	0.153016	0.0711114	0.109013		0.0807102	0.0721309	0.0725929	0.0751447		0.139508	0.151944	0.0723765	0.120134		0.100928	0.0837344	0.0843691	0.0894156		8.6	0.139529	0.153741	0.14066	0.144643		0.185438	0.189359	0.159431	0.178076
34.5	0.10271	0.152177	0.0706683	0.108518		0.0803185	0.0723661	0.072278	0.0749875		0.139426	0.151177	0.0724173	0.119854		0.100624	0.0831462	0.083782	0.0889183		8.625	0.14026	0.153062	0.140892	0.144738		0.184804	0.18883	0.159216	0.177617
34.6	0.103726	0.151891	0.0701499	0.108589		0.0797505	0.0717263	0.0719724	0.074483		0.138872	0.151365	0.0718022	0.11954		0.0997527	0.0830214	0.0838428	0.0886148		8.65	0.140133	0.15319	0.140403	0.144575		0.185123	0.188607	0.158734	0.177488
34.7	0.104201	0.151329	0.0699827	0.108504		0.0791432	0.0716322	0.0720187	0.0742647		0.138647	0.151228	0.0713332	0.119259		0.100097	0.082665	0.0835594	0.088505		8.675	0.139926	0.153167	0.139842	0.144312		0.184853	0.188221	0.158522	0.177199
34.8	0.102642	0.150624	0.0697737	0.10768		0.0787221	0.0714723	0.0721113	0.0741019		0.138093	0.15087	0.0716424	0.11908		0.0999554	0.081952	0.083276	0.0881111		8.7	0.139159	0.15279	0.140185	0.144045		0.183621	0.18787	0.158406	0.176632
34.9	0.101355	0.150078	0.0693723	0.106935		0.0784871	0.0708513	0.0719909	0.0737764		0.13799	0.149984	0.0717546	0.118777		0.0997122	0.082255	0.0830736	0.0880788		8.725	0.140144	0.152994	0.140153	0.14443		0.18298	0.187633	0.15802	0.176211
35	0.103252	0.149441	0.0689125	0.107202		0.078017	0.0702961	0.0714167	0.0732432		0.13836	0.14983	0.0712652	0.118658		0.0989623	0.0819164	0.0832557	0.0877753		8.75	0.140324	0.153275	0.139744	0.144448		0.181641	0.187524	0.157855	0.175673
35.1	0.102507	0.148694	0.0681182	0.10644		0.0776154	0.069948	0.0707591	0.0727742		0.13799	0.148978	0.0715337	0.118344		0.0987597	0.0818273	0.0825675	0.0874588		8.775	0.13911	0.152291	0.140137	0.143846		0.182634	0.186379	0.157589	0.175534
35.2	0.101287	0.1484	0.0678673	0.105851		0.0774	0.0696563	0.0706757	0.0725773		0.137437	0.148142	0.0709083	0.117665		0.0980909	0.0811321	0.0826485	0.0870197		8.8	0.139878	0.152245	0.140001	0.144041		0.181445	0.185894	0.157255	0.174865
35.3	0.100136	0.147619	0.066772	0.104842		0.0772335	0.0693458	0.0701941	0.0722578		0.137396	0.147034	0.0706025	0.117154		0.0982327	0.0808648	0.0821222	0.0868001		8.825	0.139107	0.152503	0.139928	0.143846		0.180861	0.185392	0.156787	0.174347
35.4	0.0996612	0.147032	0.0667553	0.104483		0.0765675	0.0691388	0.0700089	0.0719051		0.137826	0.146267	0.0704087	0.116941		0.0973815	0.080847	0.0815756	0.0863481		8.85	0.138386	0.152342	0.139351	0.14336		0.180665	0.184928	0.156824	0.174139
35.5	0.0993225	0.146705	0.066471	0.104166		0.0761562	0.0689035	0.0697218	0.0715938		0.13715	0.145551	0.0698684	0.116299		0.0970978	0.0801519	0.0810089	0.085825		8.875	0.139073	0.151683	0.139674	0.143477		0.180511	0.18397	0.156478	0.173653
35.6	0.0985772	0.146176	0.066078	0.10361		0.075784	0.0680944	0.0694161	0.0710982		0.136268	0.145312	0.0700111	0.116007		0.0967735	0.0804014	0.0811101	0.0858444		8.9	0.138385	0.15168	0.139481	0.143182		0.180169	0.184635	0.156151	0.173652
35.7	0.0977642	0.145496	0.0659275	0.103063		0.075451	0.0682919	0.0685733	0.0707721		0.136042	0.145005	0.0696611	0.115708		0.0961453	0.0803657	0.0807862	0.0855279		8.925	0.138078	0.152063	0.13922	0.143121		0.180068	0.183613	0.156187	0.173289
35.8	0.0976965	0.144909	0.0660028	0.102869		0.0750397	0.0680379	0.0680176	0.0703651		0.133888	0.143846	0.0696882	0.114677		0.0953954	0.0797776	0.0807255	0.0850565		8.95	0.13839	0.15151	0.139122	0.143007		0.179352	0.18285	0.155789	0.172664
35.9	0.098103	0.144271	0.0657603	0.102711		0.0744325	0.0683578	0.0676101	0.0701335		0.134442	0.143999	0.0693824	0.114786		0.0952535	0.0797419	0.0806243	0.0849661		8.975	0.138967	0.150945	0.139398	0.143103		0.178494	0.182246	0.155498	0.172079
36	0.0974932	0.14349	0.0659777	0.10232		0.0743247	0.0678874	0.067323	0.069845		0.133888	0.144051	0.0693892	0.114644		0.0945442	0.0796528	0.080604	0.0847013		9	0.13919	0.151428	0.1391	0.143239		0.179168	0.182192	0.154979	0.172113
36.1	0.0969512	0.142869	0.0655847	0.101802		0.0737763	0.0674733	0.0672397	0.0694964		0.133376	0.143778	0.0688454	0.114205		0.0940375	0.0789933	0.0806648	0.0843203		9.025	0.137761	0.151377	0.139043	0.142727		0.177705	0.181946	0.154876	0.171509
36.2	0.0963415	0.142408	0.0652001	0.101317		0.0738448	0.0672569	0.0670266	0.0693761		0.133847	0.143437	0.0685293	0.114111		0.0940375	0.078922	0.0804421	0.0842234		9.05	0.138407	0.151045	0.138732	0.142728		0.178111	0.182073	0.154927	0.171704
36.3	0.0973577	0.141786	0.0646399	0.101261		0.0733062	0.067097	0.0665265	0.0689766		0.133581	0.142857	0.0680739	0.113667		0.0936119	0.0784765	0.0796324	0.0836681		9.075	0.137662	0.151056	0.138951	0.142556		0.177128	0.181415	0.154398	0.17098
36.4	0.096748	0.141367	0.0642386	0.100785		0.0729732	0.0667677	0.0661931	0.0686446		0.13313	0.141902	0.0683594	0.113299		0.0934903	0.0781735	0.0797539	0.0835583		9.1	0.138258	0.150843	0.138799	0.142633		0.176648	0.180885	0.154456	0.170663
36.5	0.096206	0.14114	0.0644058	0.100584		0.0721407	0.0664101	0.0663968	0.0683159		0.132145	0.14163	0.067887	0.112747		0.0927202	0.077514	0.0787418	0.082751		9.125	0.137961	0.150681	0.138539	0.142394		0.176253	0.180148	0.154085	0.170162
36.6	0.095122	0.140511	0.0644894	0.100041		0.0720624	0.0662878	0.0662116	0.0681873		0.131899	0.140914	0.0678258	0.1124		0.0922743	0.0775318	0.0790656	0.0827188		9.15	0.138506	0.150298	0.138583	0.142462		0.174838	0.179893	0.153486	0.169406
36.7	0.095935	0.140091	0.064155	0.10006		0.0718665	0.0660055	0.0660912	0.0679877		0.131489	0.141203	0.0674826	0.112261		0.0917474	0.0774783	0.0786203	0.0823894		9.175	0.138119	0.150446	0.138177	0.142247		0.175518	0.179864	0.153998	0.169793
36.8	0.0948509	0.139311	0.063461	0.0992076		0.0714845	0.0653939	0.0653873	0.0674219		0.130689	0.140521	0.0675675	0.111816		0.0910583	0.0776388	0.0788632	0.0823055		9.2	0.137302	0.150707	0.137762	0.141924		0.174423	0.179123	0.153163	0.168903
36.9	0.095122	0.138732	0.0631935	0.0990158		0.071132	0.0653186	0.0653318	0.0672608		0.131181	0.140573	0.0669388	0.111755		0.0905314	0.0770684	0.078681	0.0818728		9.225	0.137057	0.14996	0.137917	0.141645		0.17313	0.178715	0.15299	0.168278
37	0.0955962	0.138362	0.06265	0.0988694		0.0703778	0.0652246	0.0646093	0.0667372		0.129848	0.141135	0.0670747	0.111611		0.0907543	0.0769971	0.0782964	0.0817953		9.25	0.137313	0.149983	0.138031	0.141776		0.173951	0.178807	0.152701	0.168486
37.1	0.0949865	0.138136	0.0625831	0.0985685		0.0702603	0.0650081	0.0644241	0.0665642		0.130238	0.140555	0.0668946	0.111457		0.0900653	0.0765159	0.0782155	0.0813755		9.275	0.137033	0.150048	0.137368	0.141483		0.173538	0.178443	0.152598	0.168193
37.2	0.0951897	0.138001	0.0625162	0.098569		0.0703974	0.0643024	0.063961	0.0662203		0.130668	0.139976	0.0665853	0.111269		0.0898221	0.0765337	0.0774665	0.0810655		9.3	0.1375	0.149464	0.137457	0.141474		0.173491	0.177736	0.152474	0.1679
37.3	0.0954607	0.137347	0.0625831	0.0984636		0.0699175	0.0643965	0.0635535	0.0659559		0.128043	0.139686	0.0664256	0.110341		0.0895991	0.0762664	0.0778916	0.0810333		9.325	0.136832	0.149452	0.138069	0.141451		0.172194	0.177253	0.151904	0.167117
37.4	0.0941734	0.137045	0.0621901	0.0978028		0.0698882	0.0641237	0.0631182	0.06571		0.128002	0.139515	0.0664698	0.110284		0.089437	0.075696	0.0774665	0.0806393		9.35	0.137368	0.149546	0.13733	0.141415		0.172069	0.176947	0.151787	0.166934
37.5	0.0939702	0.136205	0.0617386	0.0973046		0.0697217	0.0638038	0.0633034	0.0656096		0.127387	0.13822	0.0663134	0.109591		0.0889101	0.0761416	0.0778916	0.0807685		9.375	0.136708	0.149208	0.13676	0.140892		0.171862	0.177198	0.151589	0.166883
37.6	0.0941734	0.13545	0.0612537	0.096959		0.069565	0.0634556	0.0627941	0.0652715		0.127018	0.137043	0.0663236	0.109072		0.0888695	0.0756604	0.0774058	0.0804262		9.4	0.13604	0.149203	0.136886	0.14071		0.17078	0.176458	0.151433	0.166224
37.7	0.0930217	0.134955	0.0610363	0.0963377		0.0690263	0.0634086	0.0623495	0.0649281		0.12632	0.137146	0.066378	0.108922		0.0888493	0.0751613	0.0773855	0.0802325		9.425	0.136722	0.148575	0.136224	0.140507		0.170505	0.175953	0.151203	0.165887
37.8	0.0926829	0.134107	0.0605012	0.0957637		0.0682918	0.0632674	0.0618494	0.0644695		0.126197	0.136822	0.0657255	0.108541		0.088829	0.0755178	0.0772641	0.0803164		9.45	0.136295	0.148422	0.136595	0.140437		0.170376	0.176254	0.151218	0.165949
37.9	0.0913957	0.133872	0.0602671	0.0951783		0.0681645	0.0632674	0.0614048	0.0642789		0.126013	0.136651	0.0659158	0.108494		0.0879981	0.0754643	0.0775677	0.0801292		9.475	0.136135	0.148743	0.136268	0.140382		0.169117	0.17552	0.150885	0.165174
38	0.0919377	0.133385	0.0600998	0.0951408		0.0679882	0.0632486	0.0608676	0.0640348		0.124844	0.135867	0.0658648	0.107857		0.0873901	0.075393	0.0766568	0.079619		9.5	0.136308	0.148354	0.136078	0.140247		0.17	0.174586	0.150469	0.165018
38.1	0.0907859	0.133226	0.0597905	0.0946008		0.0677825	0.0626935	0.0607009	0.0637256		0.124618	0.135287	0.0657323	0.107539		0.0869037	0.0749296	0.076839	0.0793542		9.525	0.137014	0.148059	0.135935	0.140336		0.169138	0.174893	0.150364	0.164798
38.2	0.0903117	0.132857	0.0598908	0.0943532		0.0676846	0.0625523	0.0604601	0.0635657		0.124003	0.135577	0.065372	0.107333		0.0873901	0.0749474	0.0765354	0.0794188		9.55	0.136098	0.147832	0.135761	0.139897		0.168452	0.174334	0.150104	0.164297
38.3	0.0907182	0.132353	0.0599661	0.0943458		0.0674985	0.0619313	0.060775	0.0634016		0.123326	0.134878	0.0650967	0.106791		0.0868631	0.074181	0.0768795	0.079083		9.575	0.136115	0.148411	0.136125	0.140217		0.169888	0.173677	0.149777	0.164448
38.4	0.0918699	0.132227	0.0593808	0.0944926		0.06695	0.0622512	0.0609602	0.0633872		0.12269	0.134469	0.0651511	0.106479		0.0872887	0.0742345	0.0764746	0.0791088		9.6	0.135816	0.147557	0.13578	0.139717		0.16897	0.173642	0.149797	0.164137
38.5	0.0912602	0.131589	0.0588457	0.0938983		0.0665975	0.0620819	0.0606824	0.0631206		0.121459	0.134622	0.0643762	0.105898		0.0870253	0.074288	0.07692	0.0791863		9.625	0.135982	0.14744	0.136046	0.139823		0.168309	0.173278	0.149441	0.163676
38.6	0.0903794	0.131363	0.0587537	0.0934987		0.0664114	0.062016	0.0607658	0.0630644		0.122198	0.134503	0.0645156	0.106122		0.0870253	0.0734681	0.0765354	0.0787665		9.65	0.134872	0.147849	0.136344	0.139688		0.166719	0.173021	0.149188	0.162976
38.7	0.0913957	0.130607	0.0580681	0.0933569		0.0659217	0.0614138	0.0604694	0.0626016		0.121911	0.133736	0.0644068	0.105729		0.0861943	0.0735928	0.0760091	0.0783791		9.675	0.135274	0.147681	0.135776	0.139577		0.16751	0.172001	0.148765	0.162759
38.8	0.0900406	0.130205	0.0576751	0.0926402		0.0660098	0.0610375	0.0599693	0.0623388		0.122854	0.132525	0.0638834	0.105393		0.0863565	0.0740741	0.0760293	0.0786116		9.7	0.134715	0.147906	0.135393	0.139338		0.166506	0.171982	0.148693	0.162394
38.9	0.0901084	0.129432	0.0576166	0.0923857		0.0658238	0.0609622	0.0600989	0.062295		0.123244	0.132235	0.0643117	0.105557		0.0854647	0.0734859	0.07609	0.0781337		9.725	0.135235	0.14748	0.135485	0.1394		0.166124	0.172027	0.148646	0.162266
39	0.0902439	0.128761	0.0574075	0.0921375		0.0656671	0.06052	0.0597007	0.0619626		0.122977	0.131502	0.0633329	0.104873		0.0854242	0.0735037	0.0756447	0.0779851		9.75	0.134515	0.147636	0.134787	0.138979		0.166005	0.171527	0.14842	0.161984
39.1	0.0902439	0.128593	0.0577085	0.0921818		0.0653634	0.0603035	0.0594321	0.0616997		0.123264	0.131093	0.0635368	0.104885		0.0853836	0.0729156	0.0754625	0.077701		9.775	0.134362	0.147043	0.135602	0.139002		0.16596	0.171519	0.147982	0.16182
39.2	0.0894309	0.128383	0.0575246	0.0917795		0.0653047	0.0603882	0.0591913	0.0616281		0.121829	0.129934	0.0629794	0.103858		0.0845324	0.0725769	0.0750779	0.0771844		9.8	0.133994	0.14702	0.134946	0.138653		0.164692	0.170783	0.147852	0.161109
39.3	0.0898374	0.127578	0.057349	0.0915881		0.0651088	0.0604259	0.0584226	0.0613191		0.121254	0.130565	0.0630644	0.103942		0.0842082	0.071864	0.0743492	0.0765902		9.825	0.135239	0.146782	0.135174	0.139065		0.164126	0.170847	0.147724	0.160899
39.4	0.0889566	0.127099	0.0570731	0.0910429		0.064815	0.0600495	0.058154	0.0610062		0.121377	0.130121	0.0627007	0.103693		0.0841271	0.0719353	0.0743897	0.0766032		9.85	0.134414	0.146995	0.135352	0.13892		0.164412	0.169915	0.147751	0.160693
39.5	0.0884824	0.126847	0.0567554	0.0906949		0.0645016	0.0594661	0.0580336	0.0606671		0.120783	0.129166	0.0620108	0.102938		0.0836204	0.0711867	0.0739849	0.0760413		9.875	0.134854	0.146907	0.134847	0.138869		0.163613	0.169536	0.147546	0.160232
39.6	0.0883469	0.125949	0.0565045	0.0902668		0.0641588	0.0589486	0.0579409	0.0603495		0.121542	0.128877	0.0623949	0.103194		0.0829314	0.0710619	0.0735598	0.0756409		9.9	0.13399	0.14683	0.135053	0.138624		0.163267	0.169444	0.147036	0.159916
39.7	0.0867886	0.125773	0.0562704	0.0896107		0.0639434	0.0588828	0.0577557	0.0601939		0.119757	0.128297	0.0621094	0.102365		0.0826274	0.0709906	0.0734586	0.075486		9.925	0.134236	0.14616	0.134454	0.138283		0.163209	0.168906	0.146898	0.159671
39.8	0.0868564	0.125152	0.0556601	0.0892228		0.0636397	0.0587887	0.0573575	0.0599286		0.119306	0.127666	0.0616472	0.101847		0.0830935	0.0709906	0.0731752	0.0755441		9.95	0.133756	0.145939	0.13518	0.138292		0.162512	0.169142	0.146782	0.159479
39.9	0.0882114	0.124598	0.0557353	0.0895149		0.0633851	0.0584593	0.0575797	0.0598081		0.11828	0.127615	0.0615282	0.101486		0.0824044	0.0705629	0.0730335	0.0751243		9.975	0.134239	0.146223	0.134866	0.138443		0.162486	0.168593	0.146441	0.159173
40	0.0876016	0.12438	0.0555347	0.0891721		0.0634243	0.0586381	0.0574038	0.0598221		0.11865	0.127291	0.0616879	0.101536		0.0823639	0.0702777	0.0734383	0.0751372		10	0.133353	0.145635	0.134565	0.137851		0.162494	0.16776	0.14627	0.158841
40.1	0.0870596	0.123709	0.055125	0.0886312		0.0624743	0.0584876	0.0569407	0.0593008		0.118157	0.126473	0.0613787	0.100994		0.0821815	0.0704559	0.0724262	0.0748208		10.025	0.133733	0.145261	0.134895	0.137963		0.161651	0.167531	0.146314	0.158499
40.2	0.0882114	0.123381	0.0545564	0.0887163		0.0620923	0.0586287	0.0568203	0.0591804		0.116886	0.125722	0.0614874	0.100395		0.0815938	0.0701173	0.0724869	0.0745302		10.05	0.133247	0.145595	0.134911	0.137918		0.161515	0.167477	0.145877	0.15829
40.3	0.0876016	0.123071	0.0545898	0.0884208		0.0618475	0.0580642	0.0565239	0.0588119		0.116578	0.125245	0.0615384	0.100154		0.0814722	0.0702599	0.0725679	0.0745689		10.075	0.134041	0.145408	0.13454	0.137996		0.161675	0.166927	0.145696	0.158099
40.4	0.0858401	0.122416	0.0538959	0.087384		0.0612892	0.0578383	0.0563757	0.0585011		0.116332	0.12533	0.0615316	0.10011		0.0810466	0.0700638	0.0724465	0.0743235		10.1	0.133565	0.145351	0.134441	0.137786		0.159774	0.16667	0.145502	0.157316
40.5	0.0863821	0.122248	0.0535614	0.0873972		0.0613676	0.0572644	0.0561442	0.0582587		0.116681	0.124427	0.0612291	0.099786		0.0802562	0.069743	0.0720619	0.0738327		10.125	0.133698	0.1454	0.134457	0.137852		0.160848	0.166541	0.145271	0.157553
40.6	0.0863821	0.121854	0.0534444	0.0872268		0.0608289	0.0572832	0.0562738	0.0581287		0.115799	0.124751	0.061066	0.0995839		0.080317	0.0693687	0.0722036	0.0737617		10.15	0.133934	0.144806	0.13395	0.137563		0.159946	0.166078	0.14533	0.157118
40.7	0.0850949	0.121325	0.0533273	0.0865824		0.0605645	0.0571515	0.0562368	0.0579843		0.11543	0.124648	0.0605018	0.0992399		0.0801346	0.0688162	0.0716975	0.0733419		10.175	0.132561	0.144735	0.134175	0.137157		0.1596	0.165671	0.144887	0.156719
40.8	0.0847561	0.120284	0.0527755	0.0859385		0.0603784	0.0568974	0.0556163	0.0576307		0.11465	0.124052	0.0604509	0.0987827		0.0796482	0.0689053	0.0710295	0.0730061		10.2	0.133082	0.144821	0.134302	0.137402		0.159443	0.165431	0.145004	0.156626
40.9	0.0844173	0.11994	0.0526835	0.0856803		0.060447	0.0564175	0.0554496	0.057438		0.114302	0.123625	0.060699	0.0986179		0.0796076	0.0680319	0.0715153	0.0728318		10.225	0.133377	0.144906	0.133858	0.13738		0.158488	0.165447	0.144511	0.156149
41	0.0848238	0.119831	0.0527504	0.0858017		0.0600552	0.0560694	0.0551532	0.0570926		0.114343	0.123728	0.060597	0.09863		0.0794252	0.0680498	0.0717582	0.0728576		10.25	0.133302	0.144838	0.133791	0.13731		0.158597	0.164434	0.144362	0.155798
41.1	0.0836043	0.119185	0.0531935	0.0853276		0.0602315	0.0559941	0.0552643	0.0571633		0.114958	0.123762	0.0608927	0.0989271		0.0792226	0.0677111	0.0720416	0.0727607		10.275	0.132751	0.144466	0.133652	0.136956		0.158658	0.164245	0.144357	0.155754
41.2	0.0834011	0.118715	0.052742	0.0849527		0.0602217	0.0554766	0.0554125	0.057037		0.113809	0.123012	0.0605596	0.0982077		0.078878	0.0676042	0.0726691	0.0728124		10.3	0.132819	0.144619	0.133366	0.136935		0.157888	0.164148	0.144158	0.155398
41.3	0.0829268	0.11843	0.052232	0.0845296		0.059732	0.0551379	0.0549772	0.0566157		0.113748	0.122909	0.0602062	0.0980285		0.0786551	0.0675685	0.0715153	0.0723603		10.325	0.132056	0.144474	0.133173	0.136568		0.157087	0.164049	0.143895	0.15501
41.4	0.0829268	0.118052	0.052232	0.0844036		0.0595949	0.0548744	0.054792	0.0564204		0.113338	0.122432	0.0597541	0.0975798		0.0783916	0.0676933	0.0706449	0.0720439		10.35	0.132798	0.144418	0.13343	0.136882		0.157548	0.163361	0.143613	0.154841
41.5	0.0823848	0.117674	0.0520815	0.0840468		0.0587723	0.0545451	0.0542548	0.0558574		0.112374	0.122227	0.0592478	0.0970457		0.077966	0.0672655	0.0702401	0.0716242		10.375	0.131991	0.144182	0.133084	0.136419		0.156854	0.162434	0.143418	0.154235
41.6	0.0830623	0.117691	0.0517721	0.0841751		0.058312	0.0546392	0.0537269	0.0555593		0.112476	0.121443	0.059122	0.0967546		0.0777026	0.0671051	0.0703413	0.0715144		10.4	0.132544	0.144174	0.133452	0.136723		0.156824	0.163008	0.143175	0.154335
41.7	0.0821138	0.116986	0.0516634	0.0835877		0.0584687	0.0540276	0.0537547	0.055417		0.112045	0.120949	0.0589249	0.096384		0.0772567	0.0671942	0.0701996	0.0713594		10.425	0.131949	0.14406	0.132919	0.136309		0.156697	0.162563	0.143208	0.154156
41.8	0.0821138	0.116516	0.0516634	0.0834311		0.0581063	0.0538112	0.0531156	0.055011		0.111594	0.121733	0.0589147	0.0965248		0.0767906	0.0673368	0.0699567	0.071185		10.45	0.132286	0.143788	0.132488	0.136187		0.15558	0.161883	0.142751	0.153405
41.9	0.0819783	0.116147	0.0513206	0.0831486		0.0578516	0.0538582	0.0529026	0.0548708		0.111574	0.120761	0.0591118	0.0962457		0.0771959	0.0666417	0.0699364	0.0710559		10.475	0.132249	0.143455	0.132393	0.136032		0.155735	0.162116	0.142457	0.153436
42	0.0802168	0.115316	0.0509778	0.0821702		0.0577341	0.0537641	0.0530971	0.0548651		0.11141	0.120556	0.0588501	0.0960328		0.0764055	0.0665526	0.0695316	0.0706426		10.5	0.132431	0.143654	0.132653	0.136246		0.155318	0.1618	0.142435	0.153184
42.1	0.0831301	0.114896	0.0507354	0.0829205		0.0573718	0.0536324	0.052597	0.0545337		0.111676	0.119397	0.0589215	0.0957272		0.0761826	0.0667665	0.0694911	0.0706361		10.525	0.132409	0.143311	0.132678	0.136133		0.154705	0.16094	0.142341	0.152662
42.2	0.0814363	0.114527	0.0505013	0.0821549		0.0567841	0.0535571	0.0523099	0.054217		0.110528	0.118937	0.0588297	0.0951955		0.0751287	0.0664635	0.0696531	0.0702422		10.55	0.131219	0.142956	0.13239	0.135522		0.154726	0.161456	0.142087	0.152756
42.3	0.0796748	0.114367	0.0502337	0.0814252		0.0566176	0.0533784	0.0524951	0.0541637		0.1102	0.118613	0.0584559	0.0948527		0.0754935	0.066107	0.069066	0.070042		10.575	0.132379	0.143211	0.132437	0.136009		0.155012	0.160403	0.141908	0.152441
42.4	0.0788618	0.113814	0.0501334	0.0809364		0.0566568	0.0533784	0.0520413	0.0540255		0.110343	0.118255	0.0584627	0.0947709		0.0747436	0.065804	0.0683576	0.0694672		10.6	0.131219	0.143263	0.131927	0.135469		0.154002	0.160369	0.141556	0.151976
42.5	0.0803523	0.113553	0.049824	0.0812431		0.0565687	0.0531526	0.0517727	0.0538313		0.109584	0.117846	0.0581976	0.0943102		0.074541	0.0660001	0.0683778	0.0694801		10.625	0.13184	0.142811	0.131914	0.135522		0.153678	0.160464	0.141545	0.151896
42.6	0.0801491	0.113528	0.0498574	0.0811782		0.0565001	0.0526256	0.0515041	0.0535433		0.109666	0.117368	0.0578475	0.0940419		0.0749463	0.0656436	0.0677098	0.069267		10.65	0.131939	0.14259	0.131999	0.135509		0.153449	0.159629	0.141325	0.151468
42.7	0.0802168	0.113201	0.0495648	0.0809942		0.0562749	0.0524092	0.0513744	0.0533528		0.110097	0.116993	0.0575315	0.093924		0.074237	0.0656614	0.0678515	0.0690927		10.675	0.131154	0.142476	0.132025	0.135218		0.154143	0.159659	0.141425	0.151742
42.8	0.079065	0.11305	0.0495314	0.0805488		0.055697	0.0529455	0.0514856	0.053376		0.109748	0.116891	0.0574907	0.0937712		0.0741559	0.0650198	0.0672847	0.0686535		10.7	0.131702	0.142386	0.132244	0.135444		0.152678	0.159303	0.141222	0.151068
42.9	0.0792683	0.112471	0.0496317	0.080457		0.0553444	0.0524092	0.0515967	0.0531168		0.107759	0.116533	0.0575349	0.0930771		0.0743383	0.0645029	0.0668394	0.0683823		10.725	0.132114	0.142403	0.131968	0.135495		0.152949	0.158828	0.140878	0.150885
43	0.0783198	0.111967	0.0494059	0.0798976		0.0552857	0.052635	0.0511058	0.0530089		0.107574	0.116328	0.0574737	0.0929292		0.0732844	0.0640573	0.0667382	0.0678528		10.75	0.131857	0.142289	0.131568	0.135238		0.152018	0.158441	0.140679	0.150379
43.1	0.0796748	0.111447	0.0492638	0.0801285		0.0550604	0.0525598	0.0511058	0.0529087		0.106836	0.116209	0.0569707	0.0924925		0.0731628	0.0645207	0.0663333	0.0678528		10.775	0.131625	0.142539	0.131467	0.13521		0.152492	0.158734	0.140367	0.150531
43.2	0.078523	0.111304	0.0491635	0.0796635		0.054796	0.0521928	0.0509762	0.052655		0.107349	0.116192	0.0562026	0.092365		0.0728994	0.0643247	0.066637	0.0677946		10.8	0.131216	0.142124	0.13154	0.13496		0.151791	0.158266	0.140099	0.150052
43.3	0.07771	0.110733	0.0488959	0.079113		0.0547764	0.0520987	0.0503279	0.052401		0.105195	0.116072	0.056121	0.0916625		0.0719671	0.0645207	0.0666572	0.0675751		10.825	0.131064	0.142161	0.131203	0.13481		0.151546	0.158197	0.140283	0.150009
43.4	0.0775745	0.110037	0.0486952	0.0787689		0.0550017	0.0515624	0.0501519	0.0522387		0.105749	0.116226	0.0564201	0.0919849		0.071886	0.0645207	0.0666167	0.0675363		10.85	0.130795	0.141784	0.131232	0.134604		0.150736	0.15771	0.13989	0.149445
43.5	0.0764228	0.109852	0.0481852	0.0781533		0.0547372	0.0514965	0.0498648	0.0520328		0.104457	0.115373	0.0560973	0.0911909		0.0721495	0.0643247	0.0669001	0.0676397		10.875	0.130226	0.141571	0.131203	0.134333		0.151063	0.157887	0.139559	0.149503
43.6	0.075	0.109861	0.0480765	0.0776458		0.0546589	0.0512331	0.0500871	0.051993		0.103062	0.115339	0.0558831	0.0906941		0.07219	0.0643425	0.0664346	0.0675105		10.9	0.131469	0.141364	0.131197	0.134677		0.15166	0.15733	0.139738	0.149576
43.7	0.0741192	0.109659	0.0476585	0.0771456		0.0544042	0.0513742	0.0499759	0.0519181		0.103083	0.114691	0.0561584	0.090569		0.072109	0.0642356	0.0659285	0.0672845		10.925	0.130375	0.141622	0.131001	0.134333		0.14973	0.156973	0.139524	0.148742
43.8	0.0743902	0.109072	0.047115	0.0768591		0.0542378	0.0513178	0.0500963	0.0518839		0.103657	0.113669	0.0559103	0.0902887		0.0719063	0.0640395	0.0663536	0.0672845		10.95	0.130302	0.141736	0.131121	0.134386		0.15011	0.156575	0.13933	0.148672
43.9	0.0746612	0.109063	0.0471317	0.076952		0.0537187	0.0509602	0.05005	0.0515763		0.103965	0.113055	0.0553802	0.0899747		0.071805	0.0636652	0.0660297	0.0670132		10.975	0.130719	0.141108	0.130813	0.134214		0.149861	0.156473	0.139302	0.148545
44	0.0743902	0.108451	0.0468725	0.0765712		0.0533171	0.0506873	0.0496425	0.0512157		0.10378	0.11372	0.0557812	0.0902971		0.0715415	0.063077	0.0657058	0.0666129		11	0.129476	0.1411	0.130794	0.13379		0.149805	0.155911	0.13876	0.148159
44.1	0.073374	0.10819	0.0471568	0.0762403		0.053464	0.050311	0.0498463	0.0512071		0.103759	0.114078	0.0555161	0.0903236		0.0717442	0.063184	0.0655844	0.0666774		11.025	0.131315	0.141145	0.130677	0.134379		0.148912	0.156109	0.138799	0.14794
44.2	0.0742547	0.107779	0.046906	0.0763132		0.0531506	0.0500946	0.0492813	0.0508422		0.102488	0.112322	0.0549111	0.089117		0.0711767	0.06338	0.0648354	0.0663287		11.05	0.129951	0.14123	0.130411	0.133864		0.14867	0.155305	0.138619	0.147531
44.3	0.074187	0.107208	0.0468642	0.0760864		0.0528275	0.050104	0.0491516	0.0506944		0.100909	0.112799	0.0550131	0.0888584		0.0711159	0.0631305	0.0648152	0.0662125		11.075	0.130291	0.141054	0.130233	0.13386		0.149073	0.154989	0.13872	0.147594
44.4	0.0735095	0.10673	0.0463876	0.0755424		0.0528568	0.0498687	0.0494387	0.0507214		0.10058	0.111844	0.055285	0.0885216		0.0702039	0.0632553	0.0646735	0.0659219		11.1	0.130109	0.14087	0.130179	0.133719		0.14808	0.155216	0.138212	0.147169
44.5	0.0737805	0.106277	0.046329	0.0754622		0.0522496	0.0499628	0.0489479	0.0503868		0.100396	0.111452	0.0552714	0.0883243		0.07067	0.0632731	0.0643091	0.0659606		11.125	0.129706	0.140904	0.130582	0.133731		0.147952	0.15437	0.137967	0.146763
44.6	0.0738482	0.105992	0.0456351	0.0751584		0.0519656	0.0497841	0.0489108	0.0502202		0.100909	0.111043	0.0555297	0.0884217		0.0696567	0.0624354	0.0647342	0.0654698		11.15	0.130152	0.14058	0.130293	0.133675		0.147259	0.154612	0.137959	0.14661
44.7	0.0751355	0.105253	0.0458023	0.0753969		0.0517012	0.0495771	0.0487904	0.0500229		0.100683	0.110037	0.0554141	0.0879598		0.0695959	0.062578	0.0648962	0.0655538		11.175	0.130196	0.140512	0.130084	0.133597		0.147111	0.154336	0.137775	0.146407
44.8	0.0760163	0.105077	0.0457856	0.0756263		0.0515445	0.0495206	0.0486422	0.0499024		0.0998011	0.109901	0.0547956	0.0874341		0.0693121	0.0620611	0.0650986	0.0653407		11.2	0.128822	0.14049	0.130436	0.133249		0.146472	0.15427	0.137684	0.146142
44.9	0.0754743	0.104363	0.0456183	0.0751519		0.0512996	0.0490972	0.048244	0.0495469		0.0994319	0.109543	0.0544795	0.0870876		0.0689676	0.0617225	0.0641674	0.0648111		11.225	0.12956	0.140646	0.130224	0.133476		0.146926	0.153977	0.137248	0.14605
45	0.0748645	0.104044	0.0456518	0.0748534		0.0512115	0.0488714	0.0478087	0.0492972		0.0982833	0.109986	0.0546019	0.0869505		0.0692919	0.0620076	0.0643699	0.0650823		11.25	0.129658	0.139942	0.129415	0.133005		0.147574	0.153544	0.137148	0.146089
45.1	0.0756098	0.103306	0.0455933	0.0748364		0.0516032	0.0486267	0.0474567	0.0492289		0.0964169	0.109713	0.054279	0.0861926		0.0690081	0.0620611	0.064127	0.0649338		11.275	0.128937	0.140104	0.129932	0.132991		0.145395	0.153242	0.137038	0.145225
45.2	0.0752033	0.103088	0.0455097	0.0746003		0.051094	0.0486455	0.0471048	0.0489481		0.0972783	0.109133	0.053776	0.0860627		0.0679745	0.0617225	0.0641067	0.0644753		11.3	0.129052	0.140041	0.129082	0.132725		0.145548	0.152656	0.136906	0.145037
45.3	0.074729	0.102828	0.0452505	0.0742692		0.0512898	0.0483821	0.0469381	0.04887		0.0962528	0.109338	0.0538644	0.0858654		0.0681772	0.0617759	0.0635399	0.0643784		11.325	0.128196	0.139953	0.129104	0.132418		0.144826	0.152279	0.136922	0.144676
45.4	0.0735095	0.102517	0.0451418	0.0737228		0.0512311	0.0483539	0.0467158	0.0487669		0.0969502	0.108145	0.0531779	0.0854059		0.0680759	0.062275	0.0632363	0.0644301		11.35	0.129999	0.139888	0.129158	0.133015		0.145535	0.152437	0.13642	0.144797
45.5	0.0726287	0.102248	0.044799	0.0732252		0.0514269	0.0478834	0.0464658	0.048592		0.0959247	0.108537	0.0535959	0.0853915		0.0680556	0.0618116	0.0627707	0.0641072		11.375	0.129097	0.139587	0.128787	0.13249		0.145254	0.152137	0.136434	0.144608
45.6	0.072561	0.102458	0.0447237	0.0732476		0.0512311	0.0483256	0.0466417	0.0487328		0.0961093	0.108809	0.0529909	0.0853277		0.0674679	0.0610986	0.06271	0.0636422		11.4	0.129724	0.139448	0.129012	0.132728		0.144853	0.152107	0.136296	0.144419
45.7	0.0721545	0.101745	0.0449411	0.0729469		0.0509568	0.0477611	0.0470122	0.0485767		0.0967861	0.108997	0.0530929	0.0856285		0.0673868	0.0616155	0.0630541	0.0639135		11.425	0.12886	0.139161	0.128977	0.132333		0.144333	0.151816	0.135807	0.143985
45.8	0.0726287	0.101569	0.0444394	0.072879		0.0508491	0.0473	0.0467621	0.0483038		0.095535	0.108844	0.0532662	0.0852688		0.0670423	0.0611343	0.06271	0.0635195		11.45	0.12869	0.139354	0.128717	0.132254		0.143784	0.151769	0.13592	0.143825
45.9	0.0713415	0.101334	0.0441301	0.0722685		0.0504672	0.0473	0.0465584	0.0481085		0.0959247	0.108554	0.0528584	0.0851365		0.0671436	0.061259	0.0625683	0.0635518		11.475	0.128357	0.139823	0.128796	0.132325		0.143231	0.15169	0.135338	0.14342
46	0.072019	0.100763	0.0440465	0.0722762		0.0500656	0.0473	0.0461138	0.0478265		0.0956375	0.107514	0.0526035	0.0845951		0.066414	0.0607778	0.062791	0.063216		11.5	0.128485	0.138949	0.12893	0.132121		0.143854	0.151264	0.135448	0.143522
46.1	0.0716802	0.10062	0.0439712	0.0720905		0.0496935	0.0474129	0.0460953	0.0477339		0.0958016	0.108213	0.0525049	0.084855		0.065806	0.0602966	0.0631756	0.0629706		11.525	0.128249	0.138917	0.128825	0.131997		0.144337	0.150916	0.135533	0.143595
46.2	0.0703252	0.100419	0.0436702	0.0714715		0.0492331	0.0472436	0.0460305	0.0475024		0.0962734	0.108008	0.0523588	0.0848694		0.0662113	0.0602788	0.0628517	0.06299		11.55	0.127835	0.139547	0.129044	0.132142		0.143125	0.150793	0.135438	0.143119
46.3	0.0701897	0.100033	0.0437371	0.0713199		0.0489491	0.0466884	0.045836	0.0471578		0.0964785	0.106746	0.0525117	0.0845386		0.0658263	0.0599758	0.0625076	0.0626477		11.575	0.128055	0.139366	0.128755	0.132059		0.142724	0.150304	0.135085	0.142704
46.4	0.0702575	0.100024	0.0435615	0.071281		0.0484986	0.0469613	0.04566	0.04704		0.0957606	0.106712	0.0526613	0.084369		0.0655628	0.0595302	0.0624873	0.0623959		11.6	0.12794	0.139039	0.128391	0.13179		0.142975	0.151052	0.134964	0.142997
46.5	0.0698509	0.0997726	0.0434695	0.071031		0.048479	0.0467073	0.0449746	0.0467203		0.0959657	0.106235	0.0516009	0.0838854		0.0651777	0.0588707	0.0617181	0.0617888		11.625	0.12799	0.138736	0.129107	0.131944		0.142609	0.15015	0.134681	0.14248
46.6	0.0686992	0.0989249	0.0429679	0.0701973		0.0483909	0.0467825	0.0445671	0.0465802		0.0956581	0.105741	0.051866	0.0837146		0.0646711	0.0588885	0.0617789	0.0616532		11.65	0.127953	0.138838	0.128514	0.131768		0.14242	0.149847	0.134625	0.142297
46.7	0.0697154	0.0988494	0.0429846	0.0705165		0.048293	0.0465849	0.0446042	0.046494		0.09453	0.105843	0.0516349	0.083338		0.0648129	0.0589598	0.0619813	0.0617888		11.675	0.126682	0.138676	0.128397	0.131252		0.141714	0.149704	0.134463	0.14196
46.8	0.0691734	0.0982703	0.0429595	0.0701344		0.0483419	0.0464908	0.0446505	0.0464944		0.0947146	0.104854	0.0512509	0.0829074		0.0647116	0.0588529	0.061536	0.0615757		11.7	0.127786	0.138418	0.12833	0.131511		0.141145	0.149671	0.134238	0.141684
46.9	0.0685637	0.0982199	0.0432103	0.069998		0.0481754	0.0460862	0.0447616	0.0463411		0.0945915	0.104394	0.0512339	0.0827029		0.063678	0.0584429	0.0614145	0.0610591		11.725	0.128174	0.138983	0.128222	0.131793		0.140802	0.148883	0.134295	0.141327
47	0.0685637	0.0976996	0.0435782	0.0699472		0.0484986	0.0460862	0.044882	0.046489		0.0941198	0.103661	0.0510605	0.0822446		0.0632119	0.0586034	0.0610704	0.0608589		11.75	0.127509	0.138619	0.128435	0.131521		0.140463	0.14875	0.133933	0.141049
47.1	0.0685637	0.097196	0.0433608	0.0697068		0.0485378	0.0461521	0.0447431	0.0464777		0.0927457	0.103268	0.0509654	0.0816696		0.0632119	0.0580152	0.0613133	0.0607233		11.775	0.12762	0.138299	0.127909	0.131276		0.140086	0.148788	0.133811	0.140895
47.2	0.0678862	0.0968435	0.0432605	0.0693301		0.0478816	0.046011	0.0445764	0.0461563		0.0932379	0.102808	0.0506595	0.0815432		0.0628471	0.0576231	0.0601393	0.0600904		11.8	0.12786	0.138248	0.127991	0.131366		0.141324	0.148846	0.133656	0.141275
47.3	0.0694444	0.0965749	0.0431016	0.069707		0.0476759	0.0455311	0.0445949	0.045934		0.093525	0.103234	0.0506663	0.0817802		0.0630295	0.0572488	0.0598356	0.059916		11.825	0.128085	0.138222	0.128039	0.131448		0.140461	0.149062	0.133304	0.140942
47.4	0.0676152	0.0960966	0.0425749	0.0687622		0.0468141	0.0457193	0.044067	0.0455335		0.0931148	0.102774	0.0504386	0.0814169		0.0629484	0.0577478	0.0593093	0.0599031		11.85	0.127211	0.138446	0.128283	0.131313		0.140256	0.148212	0.133162	0.140543
47.5	0.0678184	0.0956014	0.0417806	0.0684001		0.0467847	0.0455687	0.0442337	0.045529		0.0925406	0.102228	0.0505847	0.0811078		0.0623404	0.0573022	0.0591676	0.0595027		11.875	0.127487	0.138006	0.128083	0.131192		0.13924	0.14753	0.133345	0.140038
47.6	0.0680894	0.0953496	0.0418558	0.0684316		0.046011	0.0455781	0.0443726	0.0453206		0.0915561	0.101836	0.0506153	0.0806916		0.062158	0.0576409	0.058945	0.0594963		11.9	0.126563	0.138001	0.127683	0.130749		0.138558	0.147859	0.133123	0.139847
47.7	0.0677507	0.0949887	0.0421067	0.068282		0.0461383	0.0453429	0.0440392	0.0451735		0.091392	0.100285	0.0501735	0.0799397		0.0616919	0.0573557	0.0589855	0.0592573		11.925	0.126286	0.138324	0.127661	0.130757		0.138772	0.147753	0.133097	0.139874
47.8	0.0685637	0.0950307	0.0415465	0.0683803		0.0462363	0.045437	0.0439836	0.045219		0.0907562	0.0999778	0.0503944	0.0797232		0.0615297	0.0572666	0.058864	0.0591346		11.95	0.127332	0.137694	0.128178	0.131068		0.138871	0.146498	0.13278	0.139383
47.9	0.0684282	0.0944851	0.0415047	0.0681393		0.0460208	0.0454276	0.0438725	0.045107		0.0900999	0.100063	0.0500206	0.0794285		0.0617324	0.0573022	0.0587021	0.0591605		11.975	0.127457	0.137793	0.127766	0.131005		0.137889	0.147449	0.13265	0.139329
48	0.0672087	0.0945019	0.0414796	0.0677301		0.0462754	0.0451265	0.0432056	0.0448692		0.0899768	0.0999096	0.0501361	0.0793791		0.0614081	0.05773	0.058196	0.0590507		12	0.126889	0.137266	0.127626	0.130594		0.138639	0.146968	0.132531	0.139379
48.1	0.0684282	0.0939396	0.0414211	0.0679296		0.0463734	0.0450701	0.0430852	0.0448429		0.0894846	0.0998414	0.0496739	0.0790471		0.06155	0.0572488	0.0582163	0.058928		12.025	0.126564	0.137572	0.127287	0.130474		0.137496	0.146276	0.132051	0.138608
48.2	0.0672087	0.0934696	0.0415214	0.0673999		0.0458641	0.0449477	0.0425759	0.0444626		0.0893615	0.100148	0.0498336	0.0791758		0.0605975	0.0566606	0.0584997	0.0585018		12.05	0.126408	0.137322	0.126859	0.130196		0.136688	0.146234	0.132401	0.138441
48.3	0.0676152	0.0931843	0.040911	0.0672368		0.0453646	0.044656	0.0423536	0.0441247		0.0892385	0.0997221	0.0495651	0.0788943		0.0604556	0.0561616	0.0579936	0.0581143		12.075	0.1267	0.136701	0.127433	0.130278		0.137149	0.14583	0.131895	0.138291
48.4	0.0679539	0.0927646	0.0405013	0.0670733		0.0454332	0.0444114	0.0423258	0.0440568		0.088254	0.0997732	0.0496773	0.0786634		0.0592396	0.0566606	0.0579531	0.0578947		12.1	0.127353	0.137362	0.127106	0.130607		0.137782	0.146125	0.131815	0.138574
48.5	0.0677507	0.0924205	0.0404261	0.0668658		0.0455409	0.0442609	0.0423165	0.0440394		0.0884591	0.0997562	0.0491573	0.0785335		0.0594828	0.0566428	0.0580948	0.058011		12.125	0.126515	0.137149	0.127465	0.130376		0.136788	0.145576	0.13185	0.138071
48.6	0.0664634	0.0922695	0.0404094	0.0663808		0.0451883	0.044355	0.0423536	0.0439656		0.0885616	0.0999437	0.0494836	0.0787452		0.059422	0.0566071	0.0579734	0.0579399		12.15	0.126096	0.136601	0.127566	0.130088		0.135394	0.145464	0.13157	0.137476
48.7	0.0650407	0.0921688	0.0406017	0.0659371		0.0445419	0.0443738	0.0421961	0.0437039		0.0877412	0.0997562	0.0495244	0.0784529		0.0592801	0.0565537	0.0578114	0.0578237		12.175	0.126312	0.136559	0.126859	0.12991		0.135824	0.145193	0.131351	0.137456
48.8	0.0676152	0.0917491	0.0403843	0.0665829		0.0452667	0.044148	0.0420572	0.0438239		0.0866747	0.100336	0.0490588	0.0781798		0.0596044	0.0563754	0.0576495	0.0578108		12.2	0.126578	0.136582	0.12665	0.129937		0.136345	0.145651	0.131294	0.137764
48.9	0.0665312	0.0909015	0.0402756	0.0659028		0.04511	0.0438563	0.0421406	0.0437023		0.0867978	0.100234	0.0488752	0.0781148		0.0598273	0.0563576	0.0577709	0.0579141		12.225	0.126467	0.136928	0.126802	0.130066		0.136182	0.144697	0.13115	0.137343
49	0.0660569	0.0906161	0.0402839	0.0656523		0.0448847	0.0437528	0.0419831	0.0435402		0.0871054	0.0993129	0.0490622	0.0779464		0.0594017	0.0560903	0.05769	0.0576558		12.25	0.126154	0.136224	0.127033	0.129804		0.135566	0.144547	0.130919	0.13701
49.1	0.0657182	0.0904147	0.0402421	0.0654583		0.0443167	0.043828	0.0415663	0.043237		0.0871875	0.0991083	0.0488412	0.0778201		0.0592193	0.0560724	0.057609	0.0575654		12.275	0.12716	0.13642	0.126548	0.130043		0.135278	0.144195	0.130645	0.136706
49.2	0.0665989	0.0902217	0.0398408	0.0655538		0.0439347	0.0439504	0.0418164	0.0432338		0.086244	0.0981365	0.0482567	0.0769937		0.0592599	0.055716	0.0572649	0.0573394		12.3	0.126255	0.135917	0.126183	0.129452		0.135586	0.144207	0.130891	0.136894
49.3	0.0662602	0.0897517	0.0402254	0.0654124		0.0440327	0.0436963	0.0414645	0.0430645		0.0865722	0.097966	0.0480222	0.0769468		0.0587735	0.0550921	0.0574876	0.0570294		12.325	0.125909	0.135761	0.126142	0.129271		0.135276	0.143939	0.13033	0.136515
49.4	0.0667344	0.0895167	0.040309	0.06552		0.0437389	0.0431318	0.0415015	0.0427907		0.0862645	0.0973522	0.048481	0.0768024		0.0584492	0.0551456	0.0574268	0.0569261		12.35	0.126455	0.136164	0.126475	0.129698		0.134793	0.14375	0.130411	0.136318
49.5	0.0661924	0.0893236	0.0401	0.0652053		0.0435234	0.043207	0.0413163	0.0426822		0.0866542	0.096926	0.0483994	0.0767375		0.058814	0.0549852	0.057528	0.0570165		12.375	0.126094	0.135844	0.126209	0.129382		0.134296	0.144052	0.129899	0.136082
49.6	0.0663957	0.0891893	0.0393809	0.0649886		0.043592	0.0429906	0.041307	0.0426299		0.086203	0.0967043	0.048046	0.0764018		0.0585505	0.0549139	0.057022	0.0567452		12.4	0.12545	0.135861	0.125625	0.128979		0.134615	0.143129	0.129916	0.135886
49.7	0.0665989	0.088199	0.0392639	0.0646873		0.043494	0.0430659	0.0412514	0.0426038		0.0863876	0.0958348	0.048012	0.0761372		0.0580844	0.0549317	0.0568803	0.056558		12.425	0.125751	0.136201	0.126339	0.12943		0.133323	0.143393	0.130033	0.135583
49.8	0.0652439	0.0881319	0.0393475	0.0642411		0.0434646	0.0424543	0.0407513	0.0422234		0.0864491	0.0954768	0.0477503	0.0759363		0.0574359	0.054807	0.057022	0.0563513		12.45	0.12504	0.135654	0.125844	0.128846		0.134421	0.143108	0.129883	0.135804
49.9	0.0655827	0.0877542	0.0392388	0.0641919		0.0433275	0.0428024	0.0406031	0.0422444		0.0854852	0.0958348	0.0478421	0.0758124		0.0574561	0.0545753	0.0565767	0.0561317		12.475	0.125871	0.135611	0.12618	0.129221		0.133243	0.143228	0.129519	0.13533
50	0.0665989	0.0874856	0.0387037	0.0642627		0.0433961	0.0423978	0.0404735	0.0420891		0.0848083	0.0966191	0.0473866	0.0757294		0.0573953	0.0548961	0.0559289	0.056022		12.5	0.125337	0.135381	0.125616	0.128778		0.133365	0.143023	0.129529	0.135306
50.1	0.0665989	0.087343	0.0382773	0.0640731		0.0433177	0.0426331	0.0409088	0.0422865		0.0847673	0.0967555	0.0471182	0.0756704		0.0568279	0.0543079	0.0557265	0.0555634		12.525	0.125707	0.135392	0.125425	0.128842		0.132417	0.142374	0.129306	0.134699
50.2	0.0654472	0.0871499	0.038085	0.0635607		0.0430533	0.0426519	0.0402419	0.0419824		0.0842751	0.0966702	0.0474104	0.0755995		0.056382	0.054201	0.0550787	0.055176		12.55	0.124358	0.135461	0.125581	0.128467		0.133047	0.142075	0.129277	0.1348
50.3	0.0644309	0.0868562	0.038085	0.063124		0.0429847	0.042125	0.0400196	0.0417098		0.0844802	0.0960394	0.0473085	0.075401		0.0568481	0.0537732	0.0554026	0.0552728		12.575	0.124865	0.135174	0.125727	0.128588		0.132522	0.141777	0.129186	0.134495
50.4	0.0640921	0.0867135	0.0379679	0.0629245		0.0425636	0.0419086	0.0400659	0.0415127		0.0836393	0.0947437	0.0468973	0.0745517		0.0563415	0.0536128	0.0547751	0.0548531		12.6	0.125271	0.135517	0.125238	0.128675		0.13273	0.141852	0.129117	0.134566
50.5	0.0640921	0.0860337	0.03811	0.0627453		0.0421327	0.0414475	0.0400011	0.0411938		0.0832086	0.0939423	0.0467749	0.0740994		0.0561591	0.0539336	0.0553014	0.0550791		12.625	0.124623	0.134913	0.125267	0.128267		0.131617	0.141647	0.128909	0.134058
50.6	0.0632791	0.0861931	0.0375917	0.0623546		0.0420445	0.0417204	0.0398159	0.0411936		0.0827779	0.0944197	0.046554	0.0740633		0.0561996	0.0533633	0.0547549	0.054711		12.65	0.125204	0.134601	0.125019	0.128275		0.131914	0.141632	0.128458	0.134001
50.7	0.0630759	0.0855973	0.0374412	0.0620381		0.0418193	0.0411464	0.039751	0.0409056		0.0823677	0.0936866	0.0466322	0.073712		0.055166	0.0530959	0.0542691	0.0541298		12.675	0.124642	0.134825	0.124899	0.128122		0.13252	0.141125	0.128451	0.134032
50.8	0.0628049	0.0850182	0.0376167	0.0618133		0.0417213	0.0408924	0.0395288	0.0407142		0.0827163	0.0939253	0.0463671	0.0738047		0.0561996	0.0533989	0.0546739	0.0546981		12.7	0.124443	0.134249	0.125432	0.128041		0.132238	0.141333	0.128194	0.133922
50.9	0.0619919	0.0846909	0.0373241	0.0613356		0.0417605	0.0404595	0.0398159	0.0406786		0.0826958	0.0940105	0.0463535	0.0738239		0.0557537	0.0532207	0.0547549	0.0545173		12.725	0.124956	0.134694	0.124414	0.128021		0.130386	0.140889	0.128226	0.133167
51	0.0613821	0.0844726	0.0372321	0.0610289		0.0422306	0.040723	0.0396492	0.0408676		0.0827779	0.0940617	0.0463807	0.0738756		0.0555105	0.0528286	0.0547346	0.0542912		12.75	0.12489	0.13466	0.12488	0.128143		0.130971	0.140695	0.127781	0.133149
51.1	0.0616531	0.0844139	0.0369562	0.0610077		0.0416136	0.0405725	0.0396029	0.0405963		0.0824907	0.0939935	0.0464316	0.0737854		0.0556119	0.0527929	0.0551192	0.0544333		12.775	0.125418	0.134527	0.124709	0.128218		0.131041	0.140741	0.127839	0.133207
51.2	0.0631436	0.0843551	0.0369562	0.061485		0.0414765	0.0404878	0.039149	0.0403711		0.0828189	0.0927318	0.0458913	0.0732453		0.0556524	0.0528286	0.0547549	0.0543429		12.8	0.124744	0.134277	0.124791	0.127937		0.13147	0.140828	0.127938	0.133412
51.3	0.0611111	0.0840614	0.036789	0.0606538		0.0414177	0.0404313	0.0390101	0.0402864		0.0825933	0.0924079	0.0456704	0.0729867		0.0557943	0.052686	0.0546941	0.0543171		12.825	0.124935	0.13411	0.124509	0.127851		0.130874	0.1407	0.127769	0.133114
51.4	0.0622629	0.0838096	0.0369813	0.0610179		0.0413982	0.0406101	0.0387786	0.0402623		0.0821626	0.0920499	0.0453917	0.0726354		0.0550444	0.0526682	0.0541678	0.0539038		12.85	0.12415	0.133939	0.124721	0.127604		0.129691	0.140492	0.127606	0.132596
51.5	0.0638211	0.0833061	0.0368475	0.0613249		0.041359	0.0408924	0.0389545	0.040402		0.0825728	0.0913167	0.0456466	0.0725873		0.0547809	0.0521691	0.0538642	0.0535421		12.875	0.123962	0.133951	0.124544	0.127485		0.130391	0.140206	0.127561	0.132719
51.6	0.0622629	0.083348	0.0368893	0.0608334		0.0413688	0.0406571	0.0390101	0.0403453		0.0817729	0.0911121	0.0454189	0.0721999		0.0547607	0.0521513	0.0536213	0.0534517		12.9	0.124542	0.13401	0.124195	0.127582		0.129511	0.139691	0.127309	0.13217
51.7	0.0610434	0.0830795	0.0366301	0.060251		0.0413296	0.0405066	0.0392972	0.0403778		0.0815268	0.0913679	0.0449668	0.072058		0.0547809	0.0518483	0.0531355	0.0531934		12.925	0.124254	0.133502	0.124208	0.127321		0.129855	0.139096	0.127096	0.132016
51.8	0.0621274	0.0829452	0.0364295	0.0605007		0.0411043	0.0401114	0.039325	0.0401803		0.081096	0.0906177	0.0447561	0.0715924		0.0545985	0.0516166	0.053257	0.0530901		12.95	0.124662	0.133639	0.124071	0.127457		0.13022	0.139484	0.127293	0.132333
51.9	0.0628049	0.0823577	0.0363458	0.0605028		0.0409868	0.0400832	0.0389916	0.0400205		0.0808704	0.0908905	0.044977	0.0717007		0.0538689	0.0517057	0.0530748	0.0528318		12.975	0.123716	0.133732	0.123862	0.127103		0.129738	0.138869	0.126888	0.131832
52	0.0621951	0.0823241	0.0359529	0.0601574		0.0409281	0.0396315	0.0384081	0.0396559		0.0815883	0.0905154	0.0450042	0.0717885		0.0542945	0.0514562	0.0521639	0.0525864		13	0.12429	0.133221	0.124135	0.127215		0.128819	0.138084	0.12702	0.131308
52.1	0.0624661	0.0818289	0.0360198	0.0601049		0.0404188	0.0395374	0.0381673	0.0393745		0.0806243	0.0901744	0.0448513	0.0713314		0.0538689	0.051777	0.0524675	0.0526639		13.025	0.123267	0.132858	0.123932	0.126685		0.128577	0.138455	0.126914	0.131315
52.2	0.0622629	0.0815604	0.0359612	0.0599282		0.0403306	0.0394998	0.0378895	0.03924		0.0804192	0.0892537	0.0447765	0.07092		0.054031	0.0515988	0.052427	0.052638		13.05	0.124359	0.133096	0.123672	0.127042		0.128595	0.138482	0.126919	0.131332
52.3	0.0621274	0.0814513	0.0357522	0.059777		0.0403306	0.0394245	0.0378339	0.0391964		0.0799065	0.0890662	0.0447901	0.0707083		0.0533622	0.0513492	0.0523865	0.0523216		13.075	0.123381	0.132776	0.123932	0.126696		0.127336	0.138467	0.126583	0.130795
52.4	0.0619919	0.0813254	0.0351	0.0594724		0.0399781	0.0393022	0.0379728	0.0390844		0.0793322	0.0887764	0.0448751	0.0704677		0.0532001	0.0510641	0.05184	0.0519923		13.1	0.124165	0.133031	0.123957	0.127051		0.128451	0.137917	0.126811	0.13106
52.5	0.0624661	0.0809393	0.0348492	0.0594182		0.0400074	0.0388976	0.0377135	0.0388728		0.078963	0.0885888	0.0445352	0.0701729		0.0535041	0.0511175	0.0518602	0.0521149		13.125	0.123824	0.1322	0.123884	0.126636		0.127027	0.13825	0.126485	0.130587
52.6	0.0620596	0.08057	0.0348492	0.0591596		0.0397332	0.0388223	0.0376579	0.0387378		0.0790246	0.0882137	0.044226	0.0699492		0.0529366	0.0506719	0.0515769	0.0516823		13.15	0.124076	0.132946	0.123754	0.126925		0.127115	0.137546	0.126071	0.130244
52.7	0.0613821	0.0803938	0.0349913	0.0589224		0.0398507	0.0390388	0.0378061	0.0388985		0.078922	0.0876681	0.0438623	0.0695979		0.0533014	0.0501194	0.0509494	0.0513981		13.175	0.123425	0.132571	0.123586	0.126527		0.126686	0.137138	0.125832	0.129885
52.8	0.0624661	0.0802343	0.0348827	0.0591944		0.0395961	0.0387094	0.0380099	0.0387718		0.0788195	0.0877022	0.0437807	0.069551		0.0530177	0.0503689	0.051172	0.0514692		13.2	0.123512	0.13241	0.123767	0.126563		0.127047	0.137144	0.125902	0.130031
52.9	0.0617886	0.0800161	0.034498	0.0587676		0.039459	0.0384272	0.0376209	0.0385023		0.0789425	0.0868839	0.0439133	0.0693453		0.0520449	0.0504046	0.0510303	0.0511269		13.225	0.123659	0.132532	0.123783	0.126658		0.127538	0.137329	0.125972	0.13028
53	0.0609079	0.0794874	0.0347238	0.058373		0.0390379	0.0379755	0.0376857	0.038233		0.0790246	0.086577	0.043519	0.0691216		0.0520652	0.0502264	0.0509494	0.0510429		13.25	0.124689	0.132273	0.123615	0.126859		0.127075	0.137117	0.125725	0.129972
53.1	0.0607046	0.079479	0.034891	0.0583582		0.0389399	0.0380696	0.0374542	0.0381546		0.0793937	0.0866622	0.0436448	0.0693044		0.0519841	0.0504581	0.050585	0.0509848		13.275	0.122771	0.132083	0.123735	0.126196		0.127153	0.136598	0.125768	0.12984
53.2	0.0595528	0.0795209	0.0350833	0.0580523		0.0387441	0.0383142	0.0372874	0.0381152		0.0787374	0.0861337	0.0436788	0.0689375		0.0517409	0.0504402	0.050504	0.050875		13.3	0.123095	0.132401	0.123713	0.126403		0.126606	0.136614	0.125573	0.129598
53.3	0.0601626	0.078816	0.0349997	0.0579928		0.0384404	0.0381072	0.0374171	0.0379883		0.0797834	0.0858609	0.0434885	0.0690807		0.0516193	0.0501194	0.0505243	0.0507265		13.325	0.123403	0.131811	0.123145	0.12612		0.125932	0.136875	0.125493	0.129433
53.4	0.0590108	0.0787908	0.0346736	0.0574917		0.0384111	0.0375333	0.0373245	0.0377563		0.078881	0.0856904	0.0435122	0.0687643		0.0516396	0.0497808	0.0504028	0.0505715		13.35	0.123245	0.131655	0.123155	0.126018		0.126322	0.136232	0.125381	0.129312
53.5	0.0592818	0.0785222	0.0342221	0.057342		0.0382935	0.0375803	0.0371022	0.0376587		0.0779375	0.0852471	0.0431588	0.0682061		0.0507478	0.0496738	0.0502814	0.0502099		13.375	0.123272	0.131413	0.123115	0.125933		0.125819	0.136275	0.125319	0.129138
53.6	0.0586043	0.078774	0.0338208	0.0570664		0.0379214	0.0374768	0.0365373	0.0373118		0.0779991	0.0852983	0.0434817	0.0683565		0.0506465	0.0497986	0.0496741	0.0500291		13.4	0.122642	0.131873	0.123437	0.125984		0.12603	0.135712	0.125296	0.129013
53.7	0.0584688	0.0784131	0.0337706	0.0568842		0.0380291	0.0369499	0.0360834	0.0370208		0.0780811	0.0851619	0.0433117	0.0682723		0.0509302	0.0500125	0.0497551	0.0502228		13.425	0.122644	0.131277	0.123122	0.125681		0.124538	0.136176	0.124912	0.128542
53.8	0.0583333	0.0782788	0.0333526	0.0566549		0.037843	0.0370252	0.0358241	0.0368974		0.0785323	0.0847697	0.0432166	0.0682326		0.0505857	0.0492995	0.0496336	0.049816		13.45	0.122661	0.131351	0.122823	0.125612		0.124867	0.135257	0.124759	0.128294
53.9	0.0590108	0.0777669	0.0330098	0.0565958		0.0376667	0.0369593	0.0358797	0.0368352		0.0774658	0.0844799	0.0428121	0.0676744		0.050687	0.049656	0.049249	0.0498547		13.475	0.121805	0.131158	0.122915	0.125293		0.125465	0.135273	0.125007	0.128582
54	0.0590786	0.077406	0.0330432	0.0565093		0.0375002	0.0370158	0.0358334	0.0367831		0.0770761	0.0850766	0.0432777	0.0679355		0.0504033	0.0495134	0.0489859	0.0496287		13.5	0.122201	0.131096	0.122914	0.125404		0.12583	0.135275	0.124824	0.128643
54.1	0.0588076	0.076659	0.0333944	0.056287		0.037324	0.0369029	0.0355185	0.0365818		0.076871	0.0845993	0.0425776	0.0674591		0.049998	0.0492995	0.0492085	0.0494931		13.525	0.122206	0.131479	0.122883	0.125522		0.125144	0.134985	0.124589	0.128239
54.2	0.0590108	0.0766087	0.0335532	0.0563909		0.0372358	0.0373357	0.0354629	0.0366781		0.0761532	0.0852812	0.0423023	0.0673917		0.0505046	0.0493174	0.0492693	0.0496803		13.55	0.122627	0.131013	0.122645	0.125429		0.125025	0.134681	0.124309	0.128005
54.3	0.0585366	0.0760128	0.0340047	0.0561847		0.0374023	0.0370346	0.0353795	0.0366055		0.0762147	0.0851789	0.0427815	0.0675433		0.0499169	0.0488361	0.0491478	0.0492799		13.575	0.121509	0.131209	0.122546	0.125088		0.124939	0.134509	0.124434	0.127961
54.4	0.0581978	0.0755596	0.033988	0.0559151		0.0373631	0.0373169	0.0356944	0.0367915		0.0748405	0.0845652	0.0427136	0.0668997		0.0500993	0.0489431	0.0492085	0.0493962		13.6	0.122465	0.131337	0.122857	0.125553		0.124038	0.133963	0.124246	0.127415
54.5	0.0560976	0.0757023	0.0342472	0.055349		0.0372946	0.0371946	0.036139	0.036876		0.0742457	0.0849061	0.0423669	0.0667229		0.0502412	0.0484975	0.0492085	0.0492799		13.625	0.122642	0.131113	0.122064	0.125273		0.124375	0.133937	0.124087	0.127466
54.6	0.0573171	0.0750141	0.0339295	0.0554202		0.0371281	0.0372792	0.0355648	0.0366574		0.0745739	0.0836445	0.0423057	0.0663524		0.0498156	0.0486935	0.048743	0.0490668		13.65	0.122674	0.131413	0.12233	0.125473		0.123863	0.133589	0.123818	0.12709
54.7	0.0562331	0.0750896	0.0332522	0.0548583		0.0372456	0.0368558	0.0352406	0.0364473		0.0754558	0.0838491	0.0421324	0.0666218		0.0497142	0.0487827	0.0489859	0.0491443		13.675	0.122545	0.130485	0.122227	0.125086		0.123687	0.133688	0.123896	0.12709
54.8	0.0558266	0.0749133	0.032993	0.0545776		0.0370301	0.0366488	0.0348516	0.0361769		0.0761532	0.0830307	0.0417314	0.0663957		0.0492481	0.0488183	0.0488847	0.0489764		13.7	0.122293	0.131033	0.122089	0.125138		0.123933	0.133414	0.123772	0.12704
54.9	0.0573848	0.0747958	0.0329261	0.0550356		0.0368049	0.0365359	0.0348887	0.0360765		0.0747995	0.0829796	0.0417586	0.0659903		0.0492076	0.0488361	0.0484393	0.0488279		13.725	0.122768	0.130749	0.122121	0.125213		0.122902	0.133537	0.123306	0.126582
55	0.0574526	0.0744685	0.0327589	0.0548933		0.0367755	0.0359243	0.0344626	0.0357208		0.0744098	0.0829966	0.0420848	0.0659975		0.04939	0.0482836	0.0485203	0.0487117		13.75	0.122717	0.131212	0.121601	0.125177		0.122549	0.133399	0.123257	0.126402
55.1	0.0565041	0.0739734	0.0325666	0.054348		0.0367853	0.0361219	0.0345275	0.0358116		0.073815	0.0825874	0.0417144	0.0655476		0.0489644	0.0483727	0.0482572	0.0485244		13.775	0.122903	0.130429	0.122357	0.125229		0.12285	0.133139	0.123239	0.12641
55.2	0.0569106	0.0736544	0.0321569	0.0542406		0.0361879	0.0358867	0.0346849	0.0355865		0.0738356	0.0823658	0.041762	0.0654923		0.0488833	0.0479271	0.0482976	0.04835		13.8	0.122592	0.13084	0.122666	0.125366		0.12245	0.133017	0.123248	0.126238
55.3	0.0569783	0.0735537	0.0320649	0.054199		0.0359822	0.0359525	0.0343978	0.0354442		0.0738766	0.0819736	0.041762	0.065366		0.0489036	0.0479806	0.0478321	0.0482273		13.825	0.121631	0.13059	0.121333	0.124518		0.122256	0.132819	0.123211	0.126095
55.4	0.0558266	0.0731677	0.0321318	0.0537087		0.0359137	0.0361407	0.0346201	0.0355582		0.0733638	0.0820077	0.0416498	0.0651879		0.0483766	0.0475172	0.047326	0.0477301		13.85	0.121888	0.130233	0.122068	0.12473		0.122672	0.132688	0.123116	0.126159
55.5	0.0561653	0.0727648	0.032182	0.053704		0.0357668	0.0357549	0.0342959	0.0352725		0.0731792	0.0812405	0.0414425	0.0647897		0.0483564	0.0469825	0.047407	0.0475557		13.875	0.122132	0.130287	0.121668	0.124696		0.121724	0.132676	0.123171	0.125857
55.6	0.0567073	0.0726305	0.0319897	0.0537758		0.0358255	0.0358679	0.0342589	0.0353174		0.0734459	0.0811212	0.0410721	0.0646947		0.0480118	0.0469469	0.0470426	0.0473168		13.9	0.122195	0.130457	0.121736	0.124796		0.122676	0.132687	0.122774	0.126046
55.7	0.0565041	0.0722025	0.0319144	0.0535403		0.0356394	0.0357079	0.03412	0.0351558		0.0735689	0.0812917	0.041225	0.0648451		0.0479916	0.0469469	0.0471843	0.0473555		13.925	0.122272	0.130349	0.121438	0.124687		0.122149	0.132458	0.122373	0.12566
55.8	0.0546748	0.0719759	0.0320817	0.0529108		0.0355121	0.0356797	0.0340736	0.0350885		0.0718871	0.0811553	0.0412284	0.064305		0.0479713	0.0467686	0.0467795	0.0471553		13.95	0.122568	0.129926	0.121881	0.124792		0.121921	0.132321	0.122457	0.125566
55.9	0.0555556	0.0720682	0.0321904	0.0532714		0.0353064	0.035642	0.0340459	0.0349981		0.0711693	0.0814281	0.0412182	0.0641871		0.0477889	0.0466082	0.0459091	0.0467614		13.975	0.121438	0.12977	0.121322	0.124177		0.122116	0.132091	0.122537	0.125581
56	0.0561653	0.0718416	0.03158	0.0531956		0.0352379	0.0353409	0.0339532	0.034844		0.0718051	0.0802857	0.0410856	0.0639236		0.04787	0.0464478	0.0456054	0.0466322		14	0.121289	0.129166	0.121497	0.123984		0.120522	0.132339	0.122425	0.125096
56.1	0.0551491	0.0713716	0.0315884	0.052703		0.0352183	0.0349928	0.0335365	0.0345825		0.0719281	0.0797743	0.0407832	0.0636722		0.0479308	0.0462339	0.0456257	0.0465806		14.025	0.121311	0.129552	0.1212	0.124021		0.12229	0.132458	0.122215	0.125654
56.2	0.0544038	0.0713884	0.0316385	0.0524769		0.0351987	0.0347576	0.033379	0.0344451		0.0732613	0.0800471	0.0412284	0.064317		0.0477484	0.04643	0.0453828	0.046516		14.05	0.121763	0.129665	0.12145	0.124293		0.121035	0.132319	0.122239	0.125198
56.3	0.0556233	0.0714472	0.0312874	0.052786		0.0349049	0.034607	0.0334439	0.0343186		0.0725844	0.0794162	0.0405045	0.0636397		0.0473228	0.0466082	0.0458686	0.0465999		14.075	0.121706	0.129572	0.121268	0.124182		0.121045	0.13149	0.121911	0.124815
56.4	0.0544715	0.0707506	0.0312706	0.0521642		0.0348168	0.0340801	0.0334531	0.0341167		0.0733638	0.0785126	0.0402938	0.0634749		0.047262	0.0457349	0.0462734	0.0463933		14.1	0.120786	0.12891	0.120893	0.12353		0.121161	0.131784	0.121648	0.124864
56.5	0.0539973	0.0708177	0.030978	0.051931		0.0347188	0.0336849	0.0333975	0.0339338		0.0728306	0.0769611	0.0402394	0.0627519		0.0472214	0.0457349	0.0458079	0.0462318		14.125	0.121325	0.129492	0.120971	0.123929		0.120095	0.131322	0.122036	0.124484
56.6	0.0527778	0.0707925	0.0310449	0.0515384		0.0346013	0.0335344	0.0334994	0.0338784		0.0729946	0.076569	0.0402802	0.0626762		0.0468972	0.045717	0.0462734	0.0462706		14.15	0.120906	0.129489	0.120881	0.123759		0.120463	0.131552	0.121632	0.124549
56.7	0.0530488	0.0706079	0.0308526	0.0515031		0.034092	0.0341083	0.0341663	0.0341222		0.0730562	0.0766713	0.0404841	0.0628025		0.0464716	0.0462517	0.0453828	0.0460446		14.175	0.120831	0.128851	0.12053	0.123404		0.121078	0.131456	0.121515	0.124683
56.8	0.0534553	0.0702386	0.0310031	0.0515657		0.0343173	0.0339202	0.0342867	0.0341747		0.0718871	0.0770805	0.0404433	0.0625895		0.0461068	0.0465726	0.0450994	0.0459541		14.2	0.121184	0.129344	0.120569	0.123699		0.119795	0.131193	0.121582	0.12419
56.9	0.0526423	0.0701715	0.0305098	0.0511079		0.0342879	0.0337037	0.0338606	0.0339508		0.0718051	0.0771828	0.0404841	0.062616		0.046431	0.0460913	0.0453018	0.0459477		14.225	0.121033	0.129194	0.120235	0.123487		0.11892	0.131171	0.121663	0.123918
57	0.0538618	0.0698022	0.0307773	0.0514804		0.0338864	0.033525	0.0337495	0.0337203		0.0711693	0.0778647	0.0404467	0.0626569		0.0463702	0.0455032	0.0452006	0.0456829		14.25	0.120227	0.12889	0.120624	0.123247		0.118837	0.130586	0.121293	0.123572
57.1	0.0523035	0.0692986	0.0311703	0.0509241		0.0336023	0.0334215	0.0329993	0.033341		0.0707386	0.0778306	0.0398588	0.0623105		0.0455393	0.0452715	0.0451196	0.0453084		14.275	0.120009	0.128811	0.120145	0.122988		0.119327	0.130474	0.12121	0.12367
57.2	0.0514905	0.0689126	0.0313543	0.0505858		0.0335534	0.0338543	0.0327492	0.0333856		0.0703079	0.0788195	0.0397398	0.0624909		0.0455798	0.0451645	0.0454435	0.0453859		14.3	0.120952	0.128712	0.119845	0.12317		0.11923	0.130915	0.120887	0.123677
57.3	0.051897	0.0685768	0.0316469	0.0507069		0.033808	0.0334497	0.0325825	0.0332801		0.0704719	0.0784274	0.0391281	0.0621842		0.0457622	0.0448793	0.0454233	0.0453342		14.325	0.120965	0.128814	0.119974	0.123251		0.118126	0.130876	0.1211	0.123367
57.4	0.0522358	0.0685517	0.0314379	0.0507418		0.0335925	0.0338825	0.0328604	0.0334451		0.0712103	0.0777624	0.0394543	0.0622816		0.0453772	0.0447902	0.0451804	0.0451017		14.35	0.120369	0.128763	0.119708	0.122947		0.119198	0.130679	0.120977	0.123618
57.5	0.052168	0.0677544	0.0313961	0.0504395		0.0334652	0.0334026	0.0325177	0.0331285		0.0701438	0.0771998	0.0390771	0.0616368		0.0451948	0.0448615	0.045403	0.0451405		14.375	0.121715	0.128629	0.119394	0.123246		0.11918	0.130238	0.120861	0.123426
57.6	0.0522358	0.0677963	0.0306686	0.0502336		0.0336023	0.0334685	0.0320268	0.0330326		0.0702053	0.0769441	0.039281	0.0616368		0.0456204	0.0446655	0.0450589	0.0450953		14.4	0.121168	0.128507	0.119577	0.123084		0.117777	0.130219	0.120677	0.122891
57.7	0.050542	0.0678131	0.0305014	0.0496188		0.033475	0.0336755	0.032138	0.0330962		0.0700822	0.0760063	0.0394373	0.0613252		0.0450124	0.0451823	0.0449779	0.045063		14.425	0.120501	0.128635	0.120107	0.123081		0.11808	0.130359	0.120471	0.12297
57.8	0.0508808	0.0679054	0.0300165	0.0496009		0.0327797	0.0339202	0.0317119	0.0328039		0.0705745	0.0754778	0.0393048	0.0612362		0.0456812	0.0441308	0.0449577	0.0448886		14.45	0.120416	0.128067	0.119347	0.12261		0.118422	0.130059	0.120444	0.122975
57.9	0.0497967	0.0673599	0.0298994	0.0490187		0.0325544	0.0337884	0.0318879	0.0327436		0.070595	0.0749834	0.0384144	0.0607526		0.0452556	0.0447011	0.0448565	0.0449273		14.475	0.120274	0.1287	0.119105	0.122693		0.117585	0.129835	0.120219	0.122546
58	0.050271	0.0671669	0.0297071	0.0490483		0.0324075	0.0340895	0.0319342	0.0328104		0.0692618	0.0743014	0.0385469	0.060168		0.0446881	0.044006	0.0446945	0.044443		14.5	0.121039	0.128646	0.119651	0.123112		0.117576	0.129279	0.120206	0.122354
58.1	0.0500678	0.0666801	0.0297406	0.0488295		0.0325642	0.0339672	0.0320361	0.0328558		0.0704924	0.0737899	0.0385061	0.060334		0.044607	0.0440416	0.0442087	0.0442751		14.525	0.119622	0.128314	0.119885	0.122607		0.118299	0.129423	0.120236	0.122653
58.2	0.0506775	0.0666801	0.0297322	0.0490299		0.0326328	0.0339484	0.0318694	0.0328168		0.0698566	0.0730909	0.0383192	0.0598348		0.0443233	0.0432574	0.0437837	0.0437649		14.55	0.119664	0.127837	0.119158	0.12222		0.117645	0.129035	0.120101	0.12226
58.3	0.0506098	0.0664283	0.0295315	0.0488565		0.0328482	0.0332709	0.0317304	0.0326165		0.0694875	0.0730397	0.038326	0.0597109		0.0443233	0.0434713	0.0441075	0.0439458		14.575	0.119996	0.12788	0.119009	0.122295		0.117138	0.129065	0.119758	0.121987
58.4	0.0496612	0.0661178	0.029264	0.0483477		0.0326034	0.032951	0.0317304	0.0324283		0.0699182	0.0724942	0.0382784	0.0596279		0.043918	0.0437743	0.0436217	0.0437714		14.6	0.120374	0.127593	0.118934	0.1223		0.116486	0.128918	0.119842	0.121748
58.5	0.051355	0.066143	0.0294145	0.0489708		0.0329462	0.0331016	0.0317397	0.0325958		0.0687696	0.0723748	0.0378842	0.0591094		0.0438572	0.0437921	0.0430954	0.0435906		14.625	0.119526	0.127576	0.119052	0.122052		0.116836	0.128542	0.119775	0.121718
58.6	0.0507453	0.0658828	0.0295064	0.0487115		0.032623	0.0325558	0.0315082	0.032229		0.0681543	0.0718804	0.0381459	0.0588472		0.0432086	0.0438099	0.0432169	0.0434291		14.65	0.120233	0.127383	0.11931	0.122309		0.116887	0.128188	0.119843	0.121639
58.7	0.049458	0.0652701	0.0295482	0.0480921		0.0324761	0.0327252	0.0308969	0.0320327		0.0683184	0.0711643	0.0383804	0.0587257		0.0433708	0.0436852	0.0426906	0.0432677		14.675	0.119654	0.128164	0.118424	0.122081		0.116051	0.128412	0.119541	0.121335
58.8	0.0498645	0.0653792	0.0298827	0.0483755		0.0323781	0.0325746	0.0306839	0.0318789		0.0678877	0.0718463	0.0385571	0.0589025		0.04331	0.0429901	0.0421845	0.042835		14.7	0.120039	0.127105	0.119274	0.12214		0.116931	0.12801	0.119507	0.121483
58.9	0.0490515	0.0650016	0.0294061	0.0478197		0.0323977	0.03217	0.030758	0.0317752		0.0677031	0.0714371	0.0379759	0.0584983		0.042702	0.0429188	0.0422655	0.0426413		14.725	0.119815	0.127366	0.119177	0.122119		0.115531	0.128063	0.119299	0.120964
59	0.0498645	0.0646071	0.028963	0.0478115		0.0321431	0.0320289	0.0304986	0.0315569		0.0671083	0.0719486	0.0380813	0.0585416		0.0428641	0.0432039	0.0426703	0.0429254		14.75	0.119137	0.127673	0.119016	0.121942		0.116059	0.127876	0.119311	0.121082
59.1	0.0496612	0.0643889	0.028779	0.0476097		0.0317709	0.0320195	0.0300078	0.0312661		0.0681133	0.0721702	0.0378604	0.0588363		0.0427425	0.0429366	0.042306	0.0426736		14.775	0.120222	0.127593	0.118732	0.122182		0.116392	0.127556	0.11922	0.121056
59.2	0.048916	0.0644476	0.0287623	0.0473753		0.0318982	0.0323488	0.0300911	0.0314461		0.068462	0.0723578	0.0379929	0.0590517		0.0423372	0.042794	0.042306	0.0424927		14.8	0.119296	0.127542	0.118862	0.1219		0.117175	0.127257	0.119341	0.121258
59.3	0.0503388	0.0646155	0.0287121	0.0478888		0.0317611	0.0326123	0.0299059	0.0314264		0.0687286	0.072443	0.0374627	0.0589723		0.0422561	0.0428118	0.0427715	0.0426219		14.825	0.119146	0.127301	0.119096	0.121848		0.115881	0.127191	0.119026	0.120699
59.4	0.0503388	0.064498	0.0284613	0.047766		0.0313302	0.0321606	0.0305079	0.0313329		0.0670058	0.0726306	0.0372928	0.058473		0.0424182	0.0431326	0.0423667	0.0426606		14.85	0.119764	0.127417	0.118994	0.122058		0.115363	0.126891	0.118889	0.120381
59.5	0.0500678	0.0641707	0.0287957	0.0476781		0.0312029	0.032076	0.0304153	0.0312314		0.0665545	0.0722384	0.037252	0.0581879		0.0422966	0.0427584	0.0425084	0.0425315		14.875	0.118722	0.127293	0.11866	0.121558		0.115004	0.126699	0.118789	0.120164
59.6	0.0493902	0.0639944	0.0286034	0.0473293		0.0314477	0.0318313	0.0303319	0.0312037		0.0656521	0.0710791	0.0368816	0.0573832		0.0424182	0.0424732	0.0421845	0.0423636		14.9	0.118885	0.127159	0.118731	0.121592		0.115269	0.127176	0.118809	0.120418
59.7	0.0497967	0.0638685	0.0284864	0.0473839		0.0314869	0.0316525	0.0304153	0.0311849		0.0654265	0.0704653	0.0367558	0.057056		0.0419116	0.0426514	0.0426096	0.0424023		14.925	0.118889	0.127097	0.118981	0.121656		0.11452	0.126919	0.118543	0.119994
59.8	0.0501355	0.0637426	0.0281101	0.0473294		0.0318982	0.0310786	0.0305635	0.0311801		0.0638678	0.0699367	0.0371093	0.0565375		0.0415468	0.0424554	0.0420833	0.0420471		14.95	0.118917	0.127014	0.118734	0.121555		0.114389	0.126634	0.118596	0.119873
59.9	0.0485095	0.0634741	0.0283693	0.0467843		0.031908	0.031549	0.0301838	0.0312136		0.0631089	0.069664	0.036732	0.0560852		0.0413441	0.041885	0.042812	0.0420084		14.975	0.118834	0.126716	0.118605	0.121385		0.113965	0.126501	0.118233	0.119566
60	0.0495935	0.0634069	0.0282941	0.0470982		0.0316828	0.0313797	0.0300819	0.0310481		0.063437	0.0706017	0.0370957	0.056641		0.0412022	0.0420811	0.0424072	0.0419051		15	0.118512	0.126714	0.118663	0.121296		0.11447	0.126825	0.118415	0.119903
60.1	0.047561	0.062853	0.0278342	0.0460827		0.0313106	0.0313609	0.0299429	0.0308715		0.062268	0.0710279	0.0368306	0.0563546		0.041263	0.0419207	0.0420631	0.0417565		15.025	0.118719	0.126135	0.118953	0.121269		0.114995	0.125792	0.118178	0.119655
60.2	0.0483062	0.0627607	0.0279095	0.0463255		0.0311931	0.0311915	0.0293502	0.0305783		0.0628217	0.0706699	0.0371059	0.0564882		0.0408374	0.0421524	0.0418404	0.0416338		15.05	0.119172	0.126836	0.118877	0.121628		0.114788	0.125944	0.118262	0.119665
60.3	0.0483062	0.0622571	0.0275332	0.0460322		0.0312127	0.0311821	0.0289242	0.0304396		0.0618988	0.0696128	0.036868	0.0557604		0.0415265	0.0418315	0.0416177	0.0416661		15.075	0.119205	0.126592	0.118932	0.121576		0.115274	0.125729	0.118047	0.119683
60.4	0.0487805	0.0618962	0.0272406	0.0459724		0.031291	0.0314173	0.0291928	0.0306337		0.061304	0.0691525	0.0367456	0.0553803		0.0410604	0.0414572	0.0417999	0.0414401		15.1	0.117547	0.126572	0.118363	0.120827		0.114421	0.125537	0.117912	0.11929
60.5	0.0478997	0.061485	0.0271152	0.0455		0.0308503	0.0310315	0.0293409	0.0304076		0.0629653	0.0683682	0.0367151	0.0555799		0.0406145	0.0414572	0.0415368	0.0412141		15.125	0.118586	0.125828	0.117917	0.120777		0.11412	0.12597	0.117917	0.119336
60.6	0.0487127	0.0611073	0.027366	0.0457287		0.0305075	0.0309657	0.0291001	0.0301911		0.0631499	0.0681125	0.0362528	0.0553803		0.0406956	0.0413503	0.0414153	0.0411624		15.15	0.118838	0.125837	0.118539	0.121071		0.113098	0.125893	0.117738	0.11891
60.7	0.047561	0.0606206	0.0272824	0.0451547		0.0305859	0.0306458	0.0293409	0.0301909		0.0629653	0.0680443	0.0358518	0.0551601		0.0404929	0.0409225	0.0412736	0.0408976		15.175	0.118725	0.126052	0.118301	0.121026		0.113503	0.125833	0.117358	0.118898
60.8	0.0474255	0.0604023	0.0272991	0.0450423		0.0303802	0.0304482	0.0293409	0.0300564		0.0627397	0.0670042	0.0355697	0.0546272		0.0401484	0.0411899	0.0412534	0.0408783		15.2	0.118732	0.125845	0.118308	0.120962		0.1135	0.125172	0.117587	0.118753
60.9	0.0477642	0.0598484	0.0272155	0.0449427		0.0304096	0.0305705	0.0292113	0.0300638		0.0626987	0.0666462	0.035274	0.0543842		0.0398646	0.0406017	0.0411319	0.040536		15.225	0.118159	0.125706	0.118331	0.120732		0.112954	0.12539	0.117408	0.118584
61	0.0476287	0.059882	0.0272071	0.0449059		0.0302529	0.0303164	0.0291464	0.0299053		0.0623295	0.0658108	0.0353726	0.0540161		0.0405942	0.04037	0.0406461	0.0405295		15.25	0.118343	0.125751	0.117727	0.120607		0.113519	0.125409	0.117351	0.11876
61.1	0.04729	0.0597141	0.0273744	0.0447928		0.0302529	0.0300436	0.0289705	0.0297556		0.062227	0.0659813	0.03541	0.0540594		0.0406145	0.0405661	0.0408485	0.0406716		15.275	0.118448	0.125902	0.117653	0.120668		0.113393	0.12488	0.117149	0.118474
61.2	0.0466802	0.0593533	0.0273994	0.0444776		0.0297338	0.0298366	0.0290724	0.0295476		0.0624116	0.0661177	0.0356173	0.054235		0.0403916	0.0404591	0.0408283	0.0405554		15.3	0.118325	0.125522	0.117672	0.120506		0.113736	0.124722	0.116871	0.118443
61.3	0.0464092	0.0595043	0.0272155	0.0443763		0.0296065	0.0300342	0.028813	0.0294846		0.0618578	0.0659131	0.0352537	0.0538718		0.0408172	0.0402453	0.0400996	0.040381		15.325	0.118233	0.125499	0.117579	0.120437		0.112805	0.124709	0.116993	0.118169
61.4	0.046477	0.0593365	0.02658	0.0441312		0.0292049	0.029639	0.0286093	0.0291511		0.0617142	0.0661006	0.035461	0.0539692		0.0403308	0.0400314	0.0405652	0.0402971		15.35	0.117569	0.125575	0.117415	0.120186		0.113327	0.124505	0.117146	0.118326
61.5	0.046206	0.059135	0.0264379	0.0439263		0.0293225	0.0295166	0.0286371	0.0291587		0.0620424	0.0661859	0.0354746	0.0541003		0.0394796	0.0399957	0.0395531	0.03969		15.375	0.117964	0.125286	0.117097	0.120116		0.113618	0.124157	0.116486	0.118087
61.6	0.045935	0.0591267	0.0263376	0.0437998		0.0289013	0.0296578	0.0286463	0.0290685		0.0616732	0.0659301	0.0352808	0.0538333		0.0399254	0.0399957	0.0395126	0.0398192		15.4	0.117509	0.12532	0.117299	0.120043		0.11206	0.124313	0.11682	0.117731
61.7	0.0470867	0.0586231	0.0262289	0.0439796		0.0293225	0.0290556	0.0284611	0.0289464		0.0629653	0.06622	0.0352774	0.0543132		0.0393782	0.0396393	0.0395126	0.0395157		15.425	0.117535	0.125042	0.116878	0.119819		0.112634	0.123763	0.116579	0.117659
61.8	0.0471545	0.0583293	0.0262205	0.0439014		0.0289307	0.0290086	0.0282481	0.0287291		0.0633755	0.0662711	0.0349784	0.0543457		0.0392566	0.0391937	0.0392292	0.0392251		15.45	0.11769	0.124957	0.116523	0.119723		0.112045	0.124226	0.116456	0.117576
61.9	0.046206	0.0586315	0.0261035	0.043647		0.0289993	0.0289897	0.0282851	0.028758		0.0629448	0.0661859	0.0352571	0.054288		0.0392972	0.039265	0.039634	0.039393		15.475	0.118237	0.125042	0.117193	0.120157		0.112679	0.124249	0.116447	0.117791
62	0.0465447	0.0583797	0.0261536	0.0436927		0.0286859	0.0293191	0.0281647	0.0287232		0.0614476	0.06622	0.0349784	0.0537623		0.0396214	0.0396036	0.0392089	0.0394834		15.5	0.117452	0.124477	0.116975	0.119635		0.110836	0.124246	0.116297	0.117126
62.1	0.0466802	0.0582622	0.0260031	0.0436485		0.0284117	0.0296202	0.0279146	0.0286488		0.0612015	0.0658619	0.0355052	0.0537503		0.0392972	0.0395323	0.0385207	0.0391346		15.525	0.117336	0.124863	0.116934	0.119711		0.111709	0.123689	0.11629	0.11723
62.2	0.0464092	0.0577167	0.0259613	0.0433624		0.0286075	0.0293285	0.0274053	0.0284471		0.0606272	0.0650777	0.0347031	0.0530213		0.0392364	0.0396214	0.0383183	0.039083		15.55	0.117014	0.124324	0.117105	0.119481		0.111085	0.123655	0.116338	0.117026
62.3	0.0477642	0.0574817	0.0254764	0.0435741		0.0285781	0.029686	0.0272015	0.0284886		0.0604016	0.0651288	0.0347405	0.0529864		0.0392364	0.0393363	0.0384802	0.0390313		15.575	0.117939	0.124636	0.116865	0.119814		0.111792	0.123298	0.116206	0.117099
62.4	0.0469512	0.0572467	0.0251001	0.0430993		0.0283431	0.0297142	0.0269792	0.0283455		0.0601555	0.0651459	0.0343666	0.0527879		0.0388918	0.0394254	0.0381563	0.0388505		15.6	0.117149	0.124403	0.117149	0.119567		0.111099	0.123274	0.116182	0.116852
62.5	0.0466802	0.0571963	0.0253844	0.043087		0.0283333	0.0293849	0.0268588	0.0281923		0.0600119	0.0654357	0.0345603	0.0529166		0.0388513	0.0386946	0.0379944	0.0385211		15.625	0.116781	0.124088	0.116956	0.119275		0.111573	0.122931	0.115774	0.116759
62.6	0.045935	0.0567935	0.0257272	0.0428186		0.0280885	0.0292908	0.0269977	0.0281257		0.0595197	0.0643786	0.0339112	0.0521696		0.0378785	0.0382847	0.0375693	0.037927		15.65	0.117098	0.124928	0.116585	0.119537		0.111359	0.123343	0.115837	0.116846
62.7	0.0447154	0.0571292	0.0252924	0.042379		0.027824	0.029065	0.026442	0.027777		0.0597453	0.0644127	0.0341151	0.05232		0.038527	0.0384094	0.0376098	0.0381918		15.675	0.116923	0.124313	0.116657	0.119298		0.110846	0.123139	0.115708	0.116564
62.8	0.0437669	0.0567096	0.0257188	0.0420651		0.0278142	0.0287263	0.0267014	0.0277473		0.0595197	0.0642593	0.0342986	0.0522646		0.0382635	0.0382847	0.0377515	0.0381078		15.7	0.117273	0.123932	0.116818	0.119341		0.110355	0.122844	0.115656	0.116285
62.9	0.0447832	0.0566256	0.0253175	0.0422421		0.0278926	0.0285569	0.0262568	0.0275688		0.0602785	0.0639694	0.0335849	0.0521323		0.0377163	0.038249	0.037792	0.0379335		15.725	0.116939	0.123833	0.116855	0.119209		0.110703	0.122798	0.115782	0.116427
63	0.0428184	0.0564913	0.0253259	0.0415452		0.0276086	0.0279453	0.0265161	0.0273567		0.0592735	0.0636796	0.0335646	0.0517281		0.0381419	0.0382669	0.0376705	0.0380368		15.75	0.116756	0.124037	0.116772	0.119188		0.109796	0.12266	0.115432	0.115963
63.1	0.0437669	0.0560801	0.0251754	0.0416741		0.0276575	0.0279359	0.0268032	0.0274656		0.0590069	0.0638842	0.0337413	0.0517846		0.0377569	0.0380708	0.0375693	0.0378108		15.775	0.11632	0.123688	0.116609	0.118872		0.110543	0.122195	0.115582	0.116107
63.2	0.0443767	0.0557612	0.0253175	0.0418185		0.0273735	0.0277759	0.0268681	0.0273392		0.0594376	0.0638672	0.0334762	0.0518111		0.0375542	0.0379104	0.0377515	0.0377462		15.8	0.116518	0.123881	0.11653	0.118976		0.10988	0.122468	0.115282	0.115877
63.3	0.0443767	0.0556269	0.0253928	0.0417988		0.0276967	0.02803	0.0270718	0.0275995		0.0584531	0.0636626	0.0335849	0.0514887		0.0377974	0.0377321	0.0374884	0.0376752		15.825	0.116256	0.123546	0.11612	0.118641		0.110282	0.122819	0.115359	0.116153
63.4	0.0424797	0.0557947	0.0251252	0.0411332		0.0274617	0.0280018	0.0266828	0.0273821		0.0576122	0.063117	0.0332723	0.050939		0.037615	0.0378391	0.0380754	0.0378431		15.85	0.117139	0.12402	0.116087	0.119082		0.110194	0.122271	0.115038	0.115834
63.5	0.0431572	0.0556269	0.0247991	0.0411944		0.0271483	0.0284252	0.0262753	0.0272829		0.0568329	0.0630658	0.0328882	0.0505564		0.0372097	0.0373757	0.0376705	0.0374169		15.875	0.11628	0.123365	0.116337	0.118661		0.109864	0.122544	0.114824	0.115744
63.6	0.0424119	0.0555681	0.0244312	0.0408037		0.0271776	0.0282746	0.0260901	0.0271808		0.0568124	0.0625202	0.0329902	0.050394		0.0377771	0.0373222	0.0374074	0.0374943		15.9	0.116077	0.123583	0.115764	0.118475		0.109515	0.122217	0.114882	0.115538
63.7	0.0430217	0.0554758	0.0242557	0.0409177		0.0269916	0.0284722	0.0261735	0.0272124		0.057079	0.0624009	0.0329902	0.0504301		0.0369462	0.0368766	0.0374479	0.037081		15.925	0.116589	0.123279	0.115867	0.118578		0.109301	0.121678	0.114922	0.1153
63.8	0.0434959	0.0549471	0.0240633	0.0408354		0.0270503	0.0279735	0.0261827	0.0270689		0.0575507	0.0625373	0.0328169	0.0505552		0.0368043	0.0370014	0.0372252	0.03701		15.95	0.116252	0.123708	0.115923	0.118628		0.109747	0.121828	0.114888	0.115488
63.9	0.0442412	0.0550394	0.0245065	0.0412624		0.027207	0.0279265	0.026405	0.0271795		0.0577353	0.0620429	0.0325688	0.0503471		0.0370678	0.0367519	0.0376098	0.0371263		15.975	0.116081	0.123359	0.115801	0.118414		0.109429	0.121819	0.114787	0.115345
64	0.0439024	0.0546869	0.0247824	0.0411239		0.0269132	0.0276724	0.0252843	0.0266233		0.0571815	0.0612927	0.0329222	0.0500452		0.0361558	0.0366093	0.0372455	0.0366677		16	0.116678	0.123348	0.115536	0.118521		0.109082	0.121635	0.114808	0.115175
64.1	0.0433604	0.0541162	0.0253092	0.0409286		0.0266684	0.0273243	0.0257104	0.0265677		0.0590479	0.0620088	0.0326061	0.0507333		0.0363179	0.0370727	0.0368001	0.0367452		16.025	0.115963	0.123245	0.115631	0.11828		0.10892	0.121057	0.114577	0.114851
64.2	0.0429539	0.0539819	0.0250416	0.0406591		0.0264823	0.0271173	0.0253029	0.0263008		0.0576943	0.0610369	0.0323513	0.0499032		0.0360342	0.036734	0.0369013	0.0365644		16.05	0.117017	0.123223	0.115374	0.118538		0.109104	0.121394	0.114482	0.114993
64.3	0.0418699	0.0535959	0.0247322	0.040066		0.0261983	0.0271644	0.0258493	0.026404		0.058084	0.0604402	0.0323309	0.0497998		0.0356897	0.0365736	0.0367799	0.0363578		16.075	0.116513	0.122786	0.11531	0.118203		0.109048	0.121587	0.114193	0.114943
64.4	0.0413957	0.0530419	0.0246904	0.0397093		0.0257673	0.0273808	0.0256826	0.0262769		0.0576738	0.0597412	0.0321745	0.0493775		0.0358518	0.0365736	0.0363346	0.0362674		16.1	0.115771	0.123112	0.114956	0.117946		0.108238	0.121683	0.114181	0.114701
64.5	0.0428184	0.0533357	0.0242975	0.0401505		0.0256204	0.0271926	0.0257845	0.0261992		0.0572226	0.0595536	0.0319094	0.0490852		0.0353654	0.036431	0.0360309	0.0359638		16.125	0.115944	0.123586	0.115168	0.118233		0.108407	0.121193	0.114334	0.114645
64.6	0.0430894	0.0532014	0.0244145	0.0402351		0.025689	0.0269197	0.0258308	0.0261465		0.056156	0.0593491	0.032426	0.0488831		0.0351222	0.0366627	0.035869	0.0359186		16.15	0.116368	0.123311	0.114602	0.118093		0.108539	0.121156	0.114106	0.1146
64.7	0.0436992	0.0531678	0.0244312	0.0404327		0.0258849	0.0265433	0.0259326	0.0261203		0.0556228	0.058633	0.0320488	0.0483406		0.0348587	0.0366449	0.0357273	0.035783		16.175	0.11507	0.122862	0.115023	0.117652		0.107873	0.120931	0.113834	0.114212
64.8	0.0427507	0.0529328	0.0242389	0.0399741		0.0259828	0.0266845	0.0261179	0.0262617		0.0557664	0.0580021	0.0321949	0.0482119		0.0350006	0.036235	0.0348366	0.0353955		16.2	0.115511	0.122652	0.114566	0.117576		0.107921	0.120628	0.11371	0.114086
64.9	0.0439024	0.0525887	0.0240383	0.0401765		0.0260612	0.0266468	0.0258308	0.0261796		0.0557253	0.0580192	0.0318177	0.0480723		0.0347979	0.0360389	0.0350391	0.0353245		16.225	0.115825	0.122485	0.114668	0.117659		0.107982	0.120246	0.113796	0.114008
65	0.0410569	0.0524041	0.0239379	0.039133		0.0260122	0.0267503	0.0253677	0.0260434		0.05511	0.0581215	0.0317089	0.0478895		0.0351019	0.0360033	0.0345937	0.0352664		16.25	0.115711	0.122434	0.115158	0.117768		0.10763	0.120285	0.113364	0.11376
65.1	0.0427507	0.0522111	0.0238292	0.039597		0.025689	0.0269103	0.0250713	0.0258902		0.054987	0.0577294	0.0314608	0.0476272		0.0347979	0.035932	0.0349176	0.035247		16.275	0.115554	0.12215	0.114376	0.11736		0.10797	0.120383	0.113642	0.113998
65.2	0.0430217	0.0520432	0.0240717	0.0397122		0.0255421	0.0271549	0.0253769	0.0260247		0.0544947	0.0579169	0.0317497	0.0476513		0.0345953	0.0360389	0.0348569	0.0352018		16.3	0.116202	0.122542	0.114636	0.117793		0.10732	0.120059	0.113724	0.113701
65.3	0.0418699	0.0517662	0.0241135	0.0392499		0.0256498	0.0268915	0.0252102	0.0259172		0.0549049	0.0578146	0.0315186	0.0476537		0.0342102	0.0356112	0.0345128	0.0348143		16.325	0.115466	0.121693	0.114307	0.117155		0.107806	0.119692	0.113594	0.113697
65.4	0.0407859	0.0516404	0.0237874	0.0387379		0.0255029	0.0263646	0.0250713	0.0256463		0.0543102	0.0574907	0.0313011	0.047288		0.0347169	0.0359855	0.0345128	0.0351114		16.35	0.116467	0.122235	0.11469	0.117797		0.10717	0.120107	0.113502	0.113593
65.5	0.0405149	0.05112	0.0238376	0.0384908		0.0256694	0.0266468	0.0246545	0.0256569		0.0535308	0.0572179	0.0317837	0.047134		0.0342507	0.0358607	0.0341687	0.0348079		16.375	0.116167	0.122076	0.114375	0.11754		0.107305	0.119934	0.113269	0.113502
65.6	0.0406504	0.0514305	0.0235115	0.0385308		0.025405	0.0267127	0.0241544	0.025424		0.0532641	0.0575248	0.0312603	0.0469788		0.0346763	0.035932	0.0340067	0.0349177		16.4	0.115603	0.122011	0.11434	0.117318		0.106586	0.12026	0.113264	0.11337
65.7	0.0396341	0.0512879	0.0233108	0.0380776		0.0251014	0.0263552	0.0244137	0.0252901		0.053018	0.0582579	0.0312875	0.0471749		0.0344129	0.0356112	0.0341889	0.0347756		16.425	0.114797	0.121929	0.113901	0.116876		0.10729	0.119464	0.113267	0.11334
65.8	0.0397019	0.0509018	0.0237707	0.0381248		0.0248565	0.0262611	0.0242285	0.0251154		0.0531616	0.0583602	0.0309238	0.0471244		0.0341697	0.035522	0.0341889	0.0346658		16.45	0.114988	0.121225	0.11422	0.116811		0.106986	0.119896	0.113072	0.113318
65.9	0.0409214	0.050885	0.0241219	0.0386428		0.0246606	0.026214	0.0241544	0.0250097		0.0525053	0.0580362	0.031053	0.0468634		0.033663	0.0358963	0.0336221	0.0344592		16.475	0.115259	0.121704	0.114833	0.117265		0.106533	0.11936	0.112764	0.112886
66	0.0422087	0.0505241	0.0240968	0.0389432		0.0244452	0.0261387	0.0243396	0.0249745		0.0518695	0.0577464	0.0308287	0.0464953		0.034271	0.0350586	0.033946	0.0344527		16.5	0.116063	0.122096	0.114329	0.117496		0.105433	0.119149	0.112851	0.112478
66.1	0.0405827	0.0502472	0.0241637	0.0383312		0.0247978	0.0257906	0.02421	0.0249328		0.0519925	0.0575589	0.0307165	0.0464255		0.0342102	0.0351834	0.0333792	0.0342977		16.525	0.115226	0.121642	0.114749	0.117206		0.10602	0.119447	0.112719	0.112729
66.2	0.0413279	0.0502052	0.0240968	0.0385433		0.0242885	0.0258471	0.0246916	0.0249424		0.0514593	0.057593	0.0308899	0.0463425		0.0336427	0.0344348	0.0332982	0.0338198		16.55	0.115205	0.121327	0.113776	0.116769		0.106263	0.119677	0.11275	0.112896
66.3	0.0403117	0.0497688	0.0236202	0.0379002		0.024455	0.0254895	0.0248398	0.0249281		0.0511311	0.0573543	0.0308763	0.0461572		0.0331361	0.0345774	0.0332173	0.0336842		16.575	0.115198	0.121892	0.114413	0.117167		0.106073	0.118685	0.112523	0.112427
66.4	0.0406504	0.0496345	0.0234613	0.0379154		0.0242787	0.0257812	0.0251917	0.0250839		0.0514593	0.0572008	0.0307437	0.0461524		0.0338251	0.0346487	0.0330351	0.0338715		16.6	0.115928	0.121696	0.113899	0.117174		0.106052	0.119044	0.112697	0.112598
66.5	0.0395664	0.0495002	0.0232272	0.0374313		0.0241612	0.0256871	0.0253029	0.0250504		0.0504543	0.056928	0.0307709	0.0457711		0.0338454	0.0343279	0.033197	0.0338134		16.625	0.115013	0.121341	0.114276	0.116877		0.106122	0.119193	0.112609	0.112641
66.6	0.0404472	0.0494918	0.0229095	0.0376162		0.0241514	0.0252355	0.0252565	0.0248811		0.0503928	0.0566211	0.0310088	0.045729		0.0342102	0.0340427	0.0325898	0.0336325		16.65	0.114844	0.121491	0.113882	0.116739		0.105547	0.118104	0.112469	0.11204
66.7	0.0399729	0.0490806	0.0225333	0.0371956		0.0244256	0.0252261	0.0248212	0.0248243		0.050844	0.0561097	0.030482	0.0454944		0.0336225	0.0342388	0.0330351	0.0336584		16.675	0.114197	0.121497	0.113843	0.116512		0.10579	0.118806	0.112329	0.112308
66.8	0.0402439	0.0488204	0.0226336	0.0372326		0.0238869	0.0249908	0.0247935	0.0245571		0.0513157	0.0555811	0.0299586	0.045261		0.0333793	0.0340071	0.0325493	0.0333419		16.7	0.114789	0.121046	0.113939	0.116591		0.105153	0.118135	0.112302	0.111863
66.9	0.0398374	0.0489211	0.0222323	0.0369969		0.0242101	0.024765	0.0240896	0.0243549		0.0499826	0.0566723	0.0298431	0.0452141		0.0335009	0.0339892	0.0329136	0.0334905		16.725	0.114309	0.121321	0.113834	0.116488		0.104875	0.118503	0.112266	0.111881
67	0.0401762	0.0487029	0.0224496	0.0371096		0.024455	0.0243604	0.0236635	0.0241596		0.0503723	0.0561949	0.0299518	0.0451985		0.0331361	0.0333298	0.0325695	0.0330255		16.75	0.114548	0.12091	0.113692	0.116383		0.104901	0.118153	0.111762	0.111605
67.1	0.0403794	0.0487449	0.0226838	0.0372694		0.024171	0.0242757	0.0237747	0.0240738		0.050967	0.0551549	0.0298975	0.0449868		0.0328321	0.0331159	0.0323874	0.032793		16.775	0.114171	0.12125	0.114114	0.116512		0.104581	0.118223	0.111842	0.111549
67.2	0.0392954	0.0484511	0.0225333	0.0367599		0.0240241	0.0240311	0.0237469	0.023934		0.049757	0.0551719	0.0297853	0.0445982		0.0326091	0.0328664	0.0320837	0.0325347		16.8	0.115007	0.120754	0.113747	0.116503		0.104684	0.118053	0.111784	0.111507
67.3	0.0395664	0.0484763	0.0228259	0.0369562		0.0241318	0.0237488	0.0238303	0.0239036		0.0491006	0.0551037	0.0295678	0.0443047		0.0326902	0.0327059	0.032023	0.032483		16.825	0.11388	0.120998	0.113467	0.116115		0.105189	0.117774	0.11179	0.111584
67.4	0.0396341	0.0481238	0.0228175	0.0368585		0.0237498	0.0244357	0.023432	0.0238725		0.0486289	0.054149	0.0297513	0.0438945		0.0324673	0.0329911	0.0318611	0.0324637		16.85	0.114298	0.120964	0.113428	0.11623		0.104658	0.117747	0.111664	0.111357
67.5	0.0392954	0.0483001	0.0226336	0.036743		0.0234364	0.0243698	0.0230615	0.0236226		0.0494493	0.0540978	0.0298465	0.0441507		0.0322038	0.0331159	0.0320028	0.0324701		16.875	0.114363	0.120634	0.114138	0.116379		0.10455	0.117702	0.111437	0.11123
67.6	0.0386856	0.0479811	0.0225751	0.0364139		0.0233483	0.024097	0.0224132	0.0232862		0.0498595	0.0532454	0.0293061	0.043779		0.0323254	0.0329555	0.0320432	0.0324637		16.9	0.114343	0.120597	0.114064	0.116335		0.104743	0.117932	0.111681	0.111452
67.7	0.0384146	0.0478888	0.0224078	0.0362371		0.0234168	0.0242193	0.0225707	0.0234023		0.0496954	0.0528362	0.0290886	0.0435095		0.0315958	0.032599	0.0323671	0.0322054		16.925	0.115108	0.120822	0.113572	0.116501		0.10448	0.117582	0.111399	0.111154
67.8	0.0380759	0.0474944	0.0220818	0.035884		0.0231524	0.024191	0.022617	0.0233201		0.0497364	0.0526827	0.0291056	0.0434734		0.0316769	0.0321178	0.0318813	0.0319018		16.95	0.114206	0.120586	0.113408	0.116067		0.104053	0.117366	0.111713	0.111044
67.9	0.0384824	0.0468565	0.0222741	0.035871		0.0234658	0.024304	0.0226818	0.0234839		0.0498595	0.0530749	0.0293333	0.0437285		0.0317579	0.0325455	0.0311931	0.0318631		16.975	0.114155	0.120793	0.113572	0.116174		0.105328	0.11741	0.111446	0.111395
68	0.0386179	0.046546	0.0223995	0.0358545		0.0233189	0.0240781	0.0227096	0.0233689		0.0491212	0.0529896	0.029092	0.0433965		0.031839	0.0319752	0.0311931	0.0316823		17	0.113917	0.120524	0.113391	0.115944		0.104528	0.116946	0.111351	0.110942
68.1	0.0361789	0.0463865	0.0224413	0.0350022		0.0230643	0.0242475	0.0221539	0.0231552		0.0480751	0.0535011	0.0290818	0.0432665		0.0317985	0.0316722	0.0309704	0.0314885		17.025	0.113502	0.120438	0.113728	0.11589		0.104056	0.117124	0.111296	0.110825
68.2	0.0381436	0.0465124	0.0224413	0.0356991		0.0232112	0.024191	0.0225244	0.0233089		0.0479931	0.0537739	0.0287182	0.04321		0.0312918	0.031993	0.031274	0.0315402		17.05	0.114336	0.120609	0.113777	0.11624		0.104133	0.116875	0.111139	0.110716
68.3	0.0381436	0.0463026	0.0220399	0.0354954		0.023221	0.0242099	0.022478	0.023303		0.0483008	0.0542172	0.029092	0.0435889		0.0310891	0.0322069	0.0316789	0.0316823		17.075	0.113552	0.120223	0.113364	0.115713		0.103506	0.116963	0.110833	0.110434
68.4	0.0375339	0.0460592	0.0214881	0.0350271		0.023123	0.0240405	0.0225799	0.0232478		0.0491827	0.0540467	0.0289119	0.0437237		0.0308662	0.0319574	0.031355	0.0314175		17.1	0.113534	0.12024	0.113485	0.115753		0.103536	0.116283	0.110915	0.110245
68.5	0.0376016	0.0460005	0.0211286	0.0349102		0.0230936	0.0236171	0.0219964	0.0229024		0.0469471	0.0536716	0.0288677	0.0429201		0.0317174	0.0319752	0.0312943	0.0316758		17.125	0.113092	0.120024	0.113378	0.115498		0.104359	0.116249	0.110795	0.110468
68.6	0.0376694	0.0460424	0.0208025	0.0348381		0.0226529	0.02357	0.0219687	0.0227305		0.0469266	0.0533306	0.0283613	0.0426145		0.0313121	0.0322782	0.0311728	0.0316177		17.15	0.113608	0.120078	0.113081	0.115589		0.103184	0.116272	0.110934	0.11013
68.7	0.0368564	0.0456396	0.0205851	0.0343604		0.0227313	0.0237112	0.0219224	0.0227883		0.0461882	0.0523588	0.028606	0.0421418		0.0307041	0.0319395	0.0311728	0.0313013		17.175	0.113702	0.120041	0.112924	0.115556		0.103541	0.115943	0.110616	0.110033
68.8	0.0369919	0.0453374	0.0208025	0.0343773		0.0221632	0.023316	0.0218853	0.0224548		0.0469881	0.0526486	0.0283511	0.0423884		0.0303798	0.0316187	0.0309299	0.0310042		17.2	0.11309	0.119769	0.113381	0.115413		0.102967	0.11621	0.110555	0.109911
68.9	0.0358401	0.0450689	0.0211955	0.0340348		0.0222906	0.0229114	0.0218297	0.0223439		0.0470291	0.0525122	0.0280928	0.0422609		0.0304609	0.0319039	0.0311526	0.0312044		17.225	0.112849	0.119439	0.112985	0.115091		0.103159	0.116053	0.110469	0.109894
69	0.0359079	0.0451276	0.0212373	0.0340909		0.0221828	0.0232501	0.0215797	0.0223375		0.0474393	0.0519837	0.0285448	0.0423547		0.0303393	0.0319039	0.0310109	0.0311204		17.25	0.113777	0.119808	0.11289	0.115492		0.102433	0.115811	0.11057	0.109605
69.1	0.0367886	0.0450017	0.0210784	0.0342896		0.0222318	0.023316	0.0217649	0.0224376		0.0471522	0.0509948	0.0280792	0.0417568		0.0300961	0.0310127	0.0307882	0.030649		17.275	0.11339	0.119411	0.1128	0.1152		0.102487	0.115754	0.110321	0.109521
69.2	0.0355014	0.0446324	0.0213961	0.0338433		0.0218303	0.0232031	0.0216723	0.0222352		0.046783	0.050705	0.0282254	0.041598		0.0299339	0.0311375	0.0304036	0.0305199		17.3	0.113408	0.119564	0.112407	0.115126		0.103301	0.115785	0.110629	0.109905
69.3	0.0363144	0.0443639	0.0213878	0.034022		0.0219184	0.0233536	0.0213574	0.0222098		0.0463318	0.0510289	0.0282322	0.0415824		0.0299542	0.0309593	0.0298166	0.0302745		17.325	0.112853	0.119817	0.112249	0.114973		0.102368	0.115653	0.110097	0.109373
69.4	0.0357046	0.0442296	0.0210617	0.0336653		0.0216148	0.0229584	0.0213574	0.0219769		0.0471317	0.0511312	0.0278141	0.0417051		0.0291638	0.0303711	0.0302822	0.029958		17.35	0.112491	0.120013	0.112674	0.115059		0.1026	0.116107	0.110255	0.109654
69.5	0.0360434	0.0440617	0.0209112	0.0336721		0.0221437	0.0228738	0.0212462	0.0220879		0.045778	0.0506709	0.0275286	0.0410447		0.029711	0.030585	0.0296952	0.0300226		17.375	0.112984	0.1198	0.11258	0.115121		0.10291	0.115694	0.110167	0.10959
69.6	0.0352981	0.0440114	0.0205266	0.0332787		0.0219184	0.0226009	0.0212648	0.021928		0.045778	0.0506197	0.0272092	0.0409136		0.0292449	0.0307276	0.0291891	0.0297643		17.4	0.112254	0.118983	0.112504	0.11458		0.102414	0.116043	0.110034	0.109497
69.7	0.0353659	0.0437428	0.0203092	0.0331393		0.0221241	0.0226668	0.0212462	0.0220124		0.0451422	0.0497332	0.0274539	0.040501		0.0290625	0.0304246	0.0293713	0.0296545		17.425	0.112331	0.119193	0.112822	0.114782		0.10221	0.115088	0.109783	0.109027
69.8	0.0353659	0.043768	0.0201253	0.0330864		0.0219967	0.0222433	0.021274	0.021838		0.0449576	0.0492728	0.027685	0.0403662		0.0288598	0.0302285	0.0292296	0.0294737		17.45	0.113374	0.119647	0.112464	0.115162		0.102254	0.114859	0.109979	0.109031
69.9	0.0350271	0.0435666	0.0198911	0.0328283		0.0219282	0.0222339	0.0216167	0.0219263		0.0448141	0.0481476	0.027583	0.0398911		0.0289409	0.030478	0.0287235	0.0294285		17.475	0.11357	0.119298	0.112102	0.11499		0.10191	0.115488	0.109912	0.109103
70	0.0361789	0.0436841	0.0197824	0.0332151		0.0223787	0.0224221	0.0213944	0.0220651		0.044568	0.047602	0.0274131	0.0395663		0.0288801	0.0302641	0.0289462	0.0294026		17.5	0.111917	0.118883	0.112041	0.11428		0.102211	0.115561	0.109772	0.109181
70.1	0.0345528	0.0433064	0.0195232	0.0324608		0.0216148	0.0220834	0.0213018	0.0216667		0.0445474	0.0478066	0.0272364	0.0395699		0.0286774	0.0304246	0.0291284	0.0294543		17.525	0.11207	0.119017	0.112251	0.114446		0.101196	0.114896	0.109812	0.108635
70.2	0.0354336	0.0435498	0.019657	0.0328801		0.0215169	0.0221116	0.0210425	0.021557		0.0444654	0.047602	0.0270528	0.0394087		0.0290219	0.0299077	0.0283389	0.029125		17.55	0.11284	0.119337	0.111695	0.114624		0.101607	0.115056	0.109461	0.108708
70.3	0.0333333	0.0432141	0.0196069	0.0320514		0.0213112	0.0219517	0.0207183	0.0213271		0.0438911	0.0469882	0.0269645	0.0389925		0.0284747	0.0304958	0.0281163	0.0290927		17.575	0.113311	0.118863	0.112201	0.114792		0.101956	0.114657	0.109639	0.108751
70.4	0.0347561	0.0428868	0.0195065	0.0323831		0.0216246	0.0219517	0.020246	0.0212741		0.0443013	0.0480282	0.0270426	0.0395073		0.0283531	0.0299433	0.0280555	0.0288344		17.6	0.112876	0.118869	0.112313	0.114686		0.101473	0.114555	0.109761	0.108596
70.5	0.0340786	0.0428112	0.0196821	0.0321906		0.0215364	0.0215753	0.0206998	0.0212705		0.0446295	0.0473292	0.0266994	0.0392355		0.0279073	0.0299433	0.0277114	0.0285825		17.625	0.112546	0.118497	0.111765	0.11427		0.101442	0.114628	0.109533	0.108534
70.6	0.0333333	0.0427777	0.0201838	0.0320983		0.020988	0.0217729	0.0205238	0.0210949		0.0439937	0.0475508	0.0263323	0.0389973		0.0276033	0.0302107	0.0275292	0.0285244		17.65	0.112086	0.118923	0.111971	0.114327		0.101714	0.114412	0.109213	0.108446
70.7	0.0328591	0.0424168	0.0202172	0.031831		0.0208215	0.0218199	0.0205053	0.0210489		0.0432553	0.0471246	0.0269781	0.0388589		0.0270763	0.0296225	0.0273066	0.0280723		17.675	0.112888	0.118492	0.111753	0.114378		0.101209	0.114139	0.109131	0.10816
70.8	0.0326558	0.0421314	0.0202925	0.0316932		0.0209586	0.0218764	0.020422	0.0210857		0.0432143	0.047244	0.026679	0.0387831		0.027279	0.0300146	0.027428	0.0283177		17.7	0.111956	0.118841	0.11155	0.114116		0.101715	0.114379	0.108961	0.108352
70.9	0.0336043	0.0422153	0.0201921	0.0320039		0.0208411	0.0219328	0.0199774	0.0209171		0.0440552	0.0471928	0.0266654	0.0390069		0.0270358	0.029676	0.0272863	0.0280723		17.725	0.112491	0.118526	0.111922	0.114313		0.102107	0.114129	0.109057	0.108431
71	0.0316396	0.0415775	0.0199831	0.0310667		0.0208215	0.0219328	0.0199774	0.0209106		0.043563	0.0474997	0.0265464	0.0389287		0.0270966	0.0294621	0.0272863	0.0280142		17.75	0.112383	0.118801	0.111815	0.114333		0.100875	0.113375	0.10905	0.107767
71.1	0.0322493	0.0413341	0.0196319	0.0310718		0.0207529	0.0221116	0.019857	0.0209072		0.0431118	0.0482328	0.0260503	0.0388794		0.0270358	0.029266	0.0277317	0.0280659		17.775	0.112923	0.117572	0.111451	0.113982		0.101113	0.113789	0.108902	0.107935
71.2	0.0305556	0.0411746	0.0195734	0.0304345		0.0205767	0.0224786	0.02007	0.0210417		0.0423939	0.0474827	0.0258429	0.0383308		0.0272385	0.0293195	0.0277317	0.0281498		17.8	0.112899	0.118492	0.111486	0.114292		0.100859	0.113748	0.108754	0.107787
71.3	0.0308943	0.0409564	0.0194313	0.0304273		0.0205962	0.0219893	0.0200144	0.0208667		0.0420042	0.0467154	0.0259925	0.0379988		0.0267115	0.0295334	0.0273066	0.0279238		17.825	0.112337	0.118171	0.111103	0.11387		0.100731	0.112924	0.108622	0.107425
71.4	0.0308266	0.0409061	0.0191637	0.0302988		0.0203808	0.0217541	0.0202923	0.020809		0.0414915	0.0462721	0.0262644	0.0377883		0.0275425	0.0290878	0.0273268	0.0280336		17.85	0.111797	0.118142	0.110951	0.11363		0.101339	0.113456	0.108639	0.107811
71.5	0.0300135	0.0404025	0.0195651	0.0299937		0.0205864	0.0215	0.020459	0.0208485		0.0419017	0.0460164	0.0263119	0.0378352		0.0273601	0.0292839	0.0274888	0.0280982		17.875	0.11164	0.118267	0.11156	0.113822		0.100955	0.113377	0.108632	0.107655
71.6	0.0307588	0.0403941	0.0193727	0.0301752		0.0201555	0.021293	0.0205516	0.0206667		0.0418607	0.0460846	0.0255303	0.0375706		0.0271777	0.0289809	0.0269017	0.027743		17.9	0.112617	0.117913	0.111694	0.114074		0.100071	0.113339	0.108606	0.107339
71.7	0.0304201	0.0399745	0.0195818	0.0299921		0.0201849	0.0212271	0.0195884	0.0203335		0.0409992	0.0453685	0.0257716	0.0371507		0.0278059	0.0282679	0.0267803	0.0276461		17.925	0.11159	0.118211	0.111491	0.113764		0.100462	0.11347	0.108344	0.107425
71.8	0.0310976	0.0397815	0.0195232	0.0301341		0.0197442	0.0212836	0.0198014	0.0202764		0.0409377	0.0454538	0.0251904	0.0369571		0.0276033	0.0279471	0.0268208	0.0274782		17.95	0.111149	0.117634	0.111013	0.113266		0.0996626	0.113239	0.108182	0.107028
71.9	0.0306911	0.0397395	0.0193142	0.0299149		0.019705	0.0211048	0.0200144	0.0202748		0.0410813	0.0452321	0.025272	0.0369498		0.0274209	0.027858	0.0266993	0.027349		17.975	0.111772	0.1177	0.111331	0.113601		0.100307	0.113129	0.108454	0.107297
72	0.0304878	0.0396388	0.019055	0.0297272		0.0195287	0.0207285	0.0200515	0.0201029		0.0405275	0.0456243	0.0254623	0.0369932		0.0276641	0.0281075	0.0273673	0.0277301		18	0.11205	0.117847	0.111146	0.113681		0.100657	0.113047	0.108136	0.10728
72.1	0.0315041	0.0395129	0.0191386	0.0300519		0.0197442	0.020258	0.0198107	0.0199376		0.0397481	0.045198	0.0254045	0.0365938		0.0268331	0.0283214	0.0269827	0.0274201		18.025	0.112282	0.117649	0.111082	0.113671		0.100437	0.113159	0.108093	0.10723
72.2	0.0313008	0.0394541	0.0194731	0.030076		0.0195287	0.0199663	0.019644	0.019713		0.039502	0.0453174	0.0251972	0.0364903		0.0267318	0.0284462	0.0268005	0.0273749		18.05	0.111606	0.117615	0.111144	0.113455		0.0996358	0.112672	0.108032	0.10678
72.3	0.0307588	0.0398738	0.0190216	0.0298847		0.0197246	0.0201827	0.0196069	0.0198381		0.0397071	0.0448911	0.0248607	0.036281		0.0267926	0.0282145	0.0264564	0.0272005		18.075	0.110938	0.118114	0.110727	0.11326		0.0997357	0.112799	0.108006	0.106847
72.4	0.0310298	0.0392611	0.0187958	0.0296956		0.0197834	0.0199099	0.0195328	0.019742		0.0397686	0.0439705	0.0245753	0.0358732		0.0269547	0.0277867	0.0260313	0.0269616		18.1	0.11194	0.117478	0.110939	0.113453		0.100309	0.111977	0.107919	0.106735
72.5	0.0309621	0.0391352	0.0188209	0.0296394		0.019137	0.0199851	0.0194217	0.0195146		0.0396456	0.0429816	0.0247384	0.035546		0.0262657	0.0277689	0.0265981	0.0269164		18.125	0.1117	0.117036	0.110695	0.113144		0.0999542	0.112437	0.107669	0.106687
72.6	0.0320461	0.0387659	0.0185032	0.0297717		0.0189215	0.0201827	0.0191161	0.0194068		0.0391534	0.0438341	0.0245447	0.0356338		0.0269142	0.0281788	0.0264564	0.0272263		18.15	0.111805	0.117458	0.110875	0.11338		0.0997254	0.112406	0.107761	0.106631
72.7	0.0321138	0.0385477	0.0184865	0.029716		0.0185494	0.0205026	0.0186993	0.0192504		0.0386201	0.0426747	0.0248166	0.0351647		0.0271169	0.0275906	0.0263552	0.0270455		18.175	0.11143	0.117683	0.110336	0.11315		0.0987969	0.111989	0.107859	0.106215
72.8	0.0309621	0.0382708	0.0184447	0.0292259		0.0185787	0.020512	0.0186437	0.0192448		0.038374	0.0424701	0.0248166	0.0350203		0.0271169	0.027448	0.0265981	0.0270714		18.2	0.111585	0.116999	0.11008	0.112888		0.0993311	0.112081	0.107279	0.10623
72.9	0.0330623	0.038254	0.0181604	0.0298256		0.0186669	0.0203615	0.0182547	0.0190944		0.0387432	0.0422996	0.0246942	0.0350251		0.0265291	0.027751	0.0264767	0.0269551		18.225	0.111247	0.117143	0.11021	0.112867		0.0987427	0.112257	0.107562	0.106187
73	0.0313686	0.0379099	0.0178928	0.0290571		0.0184318	0.0202768	0.0182177	0.0189754		0.0391123	0.0418904	0.0241606	0.0348002		0.0264886	0.0272698	0.0262945	0.0267097		18.25	0.11174	0.116931	0.110359	0.11301		0.0992666	0.11233	0.10755	0.106382
73.1	0.0310298	0.0377504	0.0181269	0.028969		0.0183927	0.0200604	0.018301	0.018918		0.0393379	0.0411744	0.0242898	0.0346594		0.0259414	0.0268064	0.0257479	0.0261931		18.275	0.111915	0.116916	0.110516	0.113116		0.100006	0.112022	0.107215	0.106414
73.2	0.0321816	0.0374902	0.0179597	0.0292105		0.0180499	0.0198158	0.0183473	0.0187377		0.0400763	0.0415665	0.0244223	0.0350612		0.0256577	0.0269312	0.0256265	0.0261091		18.3	0.111438	0.117331	0.11068	0.11315		0.0989567	0.111753	0.107493	0.106068
73.3	0.0305556	0.0376749	0.0181269	0.0287858		0.0181184	0.0199851	0.0185696	0.0188911		0.0399327	0.0422144	0.0239873	0.0350937		0.0259211	0.0270381	0.0255455	0.026206		18.325	0.111169	0.116936	0.110179	0.112761		0.0977361	0.111791	0.107501	0.105676
73.4	0.0300813	0.0375238	0.0181855	0.0285969		0.0181968	0.0198252	0.0181251	0.0187157		0.039543	0.0419757	0.0235829	0.0347521		0.0254145	0.0270203	0.0253431	0.0259735		18.35	0.110836	0.116993	0.110321	0.112717		0.0989767	0.111588	0.107121	0.105895
73.5	0.029878	0.0374902	0.0183276	0.0285653		0.0180793	0.0193641	0.0182269	0.0185568		0.0396866	0.0420439	0.0239533	0.0349493		0.0252929	0.0265034	0.0253633	0.025754		18.375	0.110733	0.11682	0.110372	0.112642		0.0982925	0.111523	0.106927	0.105581
73.6	0.0306911	0.0373979	0.0183694	0.0288195		0.0180303	0.0197593	0.0181065	0.018632		0.0391328	0.0412937	0.0239329	0.0345151		0.0247254	0.0265747	0.0257277	0.0257152		18.4	0.110259	0.116434	0.109924	0.112206		0.0985333	0.111548	0.106903	0.105662
73.7	0.0294038	0.0374231	0.0184112	0.0284127		0.0180205	0.0194112	0.0179676	0.0184664		0.0396046	0.0405265	0.0238174	0.0343418		0.0244822	0.0264678	0.0257884	0.0256183		18.425	0.111177	0.116899	0.109597	0.112558		0.0970832	0.111177	0.106913	0.105058
73.8	0.0306911	0.0370454	0.0179179	0.0285515		0.0174329	0.019223	0.0179213	0.0181924		0.0389893	0.0406117	0.0236814	0.0341434		0.0250699	0.0262539	0.024918	0.0254504		18.45	0.11133	0.116698	0.110083	0.112704		0.0986354	0.111286	0.106913	0.105611
73.9	0.0296748	0.036416	0.0180433	0.0280447		0.0181184	0.0197311	0.0179398	0.0185964		0.0396251	0.0394183	0.0235931	0.0338775		0.0248673	0.0262361	0.0251002	0.0254375		18.475	0.110953	0.116579	0.110299	0.11261		0.0976841	0.111221	0.106886	0.105263
74	0.0301491	0.0363992	0.0176671	0.0280718		0.017903	0.01943	0.0178472	0.0183934		0.0402199	0.0388897	0.0235795	0.0338607		0.0248673	0.0257014	0.0245739	0.0250759		18.5	0.110466	0.116624	0.109766	0.112285		0.0987604	0.110703	0.106762	0.105409
74.1	0.0287263	0.0361138	0.0171654	0.0273352		0.017903	0.0195617	0.0172915	0.0182521		0.0396456	0.039333	0.023192	0.0337115		0.0250294	0.0261469	0.024412	0.0252373		18.525	0.11119	0.116658	0.10963	0.112493		0.0985527	0.111387	0.1066	0.105513
74.2	0.0289295	0.036332	0.0169146	0.027392		0.0177365	0.0195994	0.0177083	0.018348		0.0392149	0.0398275	0.0232226	0.0337704		0.0247051	0.0258974	0.0237237	0.024824		18.55	0.110635	0.11676	0.109571	0.112322		0.0979603	0.111307	0.106427	0.105231
74.3	0.028794	0.0365167	0.0165801	0.0272969		0.0177854	0.0192324	0.0176898	0.0182359		0.0393174	0.0392307	0.0235115	0.0336923		0.0245227	0.0255231	0.0240881	0.0247465		18.575	0.110802	0.116965	0.109558	0.112442		0.0982628	0.110946	0.106429	0.105213
74.4	0.0292005	0.0360467	0.0163544	0.0272005		0.0174329	0.0191665	0.0182362	0.0182785		0.0392559	0.039998	0.0232668	0.0338583		0.0249686	0.0257548	0.0240679	0.0249661		18.6	0.110718	0.116386	0.109729	0.112278		0.0977578	0.110983	0.1063	0.105014
74.5	0.0289973	0.0358788	0.0162875	0.0270545		0.0180499	0.018856	0.0182733	0.0183931		0.0395841	0.0394865	0.0232158	0.033756		0.0243809	0.0254696	0.0243512	0.0247659		18.625	0.110091	0.116434	0.109752	0.112093		0.0989459	0.111236	0.106314	0.105499
74.6	0.028523	0.035711	0.016438	0.0268907		0.0180695	0.0187619	0.0185418	0.0184577		0.0399943	0.0388215	0.022876	0.0335214		0.0246241	0.0250419	0.0240679	0.024598		18.65	0.110142	0.11661	0.109275	0.112009		0.0970735	0.110576	0.106458	0.104703
74.7	0.0292683	0.0351822	0.0167724	0.0270743		0.0182653	0.0190066	0.0181899	0.0184873		0.0395225	0.0384124	0.0228658	0.0332351		0.0240769	0.0253627	0.0243512	0.0246303		18.675	0.11025	0.116579	0.109418	0.112082		0.0972596	0.110707	0.106235	0.104734
74.8	0.0292005	0.0349305	0.0172323	0.0271211		0.0180988	0.0189878	0.0182547	0.0184471		0.0390713	0.0384976	0.0231614	0.0332375		0.0238539	0.025131	0.0241083	0.0243978		18.7	0.110794	0.115753	0.109345	0.111964		0.0980847	0.110586	0.106322	0.104998
74.9	0.028794	0.0350815	0.0167223	0.0268659		0.0181772	0.0189407	0.0176342	0.0182507		0.0380253	0.0383442	0.0224953	0.0326409		0.0242795	0.0250954	0.0236833	0.0243849		18.725	0.109689	0.116176	0.10939	0.111751		0.0973731	0.110401	0.106147	0.10464
75	0.0294038	0.0349137	0.0161537	0.0268237		0.0179715	0.0188372	0.0171063	0.0179717		0.0389072	0.0380884	0.02274	0.0328959		0.0237526	0.0246676	0.023157	0.0238941		18.75	0.110481	0.115909	0.109094	0.111828		0.0969052	0.110178	0.105923	0.104335
75.1	0.0281843	0.0346787	0.0164296	0.0264309		0.0182457	0.0189878	0.0171619	0.0181318		0.0380048	0.0376451	0.0223866	0.0323498		0.0235297	0.0247389	0.0236428	0.0240039		18.775	0.110798	0.115784	0.109171	0.111918		0.0966861	0.110125	0.10604	0.104284
75.2	0.028794	0.0346871	0.0169731	0.0268181		0.0177267	0.0189313	0.0166339	0.017764		0.0367332	0.0371507	0.022706	0.0319155		0.023408	0.0247745	0.0230153	0.0237778		18.8	0.1099	0.115878	0.109392	0.111723		0.097328	0.110041	0.105939	0.104436
75.3	0.0292005	0.0350312	0.0169313	0.0270543		0.0177561	0.0188278	0.0166432	0.0177424		0.0369588	0.0375428	0.0224104	0.0320153		0.0229824	0.0243111	0.0232379	0.0235454		18.825	0.109769	0.116076	0.109193	0.11168		0.0974622	0.109928	0.105842	0.104411
75.4	0.0297425	0.0345864	0.0169397	0.0270895		0.0174231	0.0186678	0.0165876	0.0175595		0.0367742	0.0377986	0.0221385	0.0319552		0.0229419	0.0246676	0.0227319	0.0235002		18.85	0.110259	0.115824	0.109199	0.11176		0.0966398	0.109603	0.105734	0.103992
75.5	0.0289295	0.034578	0.0164714	0.0266596		0.0170117	0.018649	0.0166617	0.0174408		0.0375536	0.0376622	0.0223492	0.0322102		0.0224555	0.0247924	0.0230962	0.0235066		18.875	0.110234	0.115966	0.109	0.111733		0.0965594	0.110058	0.1055	0.104039
75.6	0.028523	0.0343262	0.016045	0.0262981		0.0171391	0.0185643	0.0166154	0.0174396		0.0363435	0.0383442	0.0224239	0.0321224		0.0230432	0.024222	0.0228331	0.0234033		18.9	0.109908	0.115807	0.108801	0.111505		0.0965063	0.110224	0.105453	0.104061
75.7	0.0292005	0.0343346	0.0154514	0.0263288		0.0166983	0.0180845	0.0164487	0.0170772		0.0359743	0.037611	0.0220637	0.031628		0.0224352	0.0243824	0.0225295	0.0231708		18.925	0.109884	0.115131	0.108909	0.111308		0.0960538	0.110016	0.105489	0.103853
75.8	0.0277778	0.0341332	0.0157524	0.0258878		0.0167277	0.0182821	0.0168933	0.017301		0.0363435	0.0377645	0.0219583	0.0317531		0.021888	0.0244181	0.0225295	0.0230094		18.95	0.110487	0.115832	0.10886	0.111726		0.0962295	0.109667	0.10559	0.103829
75.9	0.0272358	0.0342758	0.0156437	0.0257184		0.0165906	0.0182821	0.0170229	0.0172985		0.0361384	0.0373382	0.0217442	0.0314668		0.0217056	0.024222	0.0227319	0.0229448		18.975	0.110011	0.115375	0.108947	0.111444		0.0960589	0.110011	0.105385	0.103818
76	0.0269648	0.0342842	0.0160868	0.0257786		0.0164829	0.0178775	0.0168007	0.0170537		0.0358513	0.0373723	0.0215097	0.0313116		0.0220907	0.0246498	0.0224485	0.0231321		19	0.109849	0.115424	0.108775	0.111349		0.0967095	0.109897	0.10509	0.103899
76.1	0.0264228	0.0340073	0.0159447	0.0254583		0.0162576	0.018028	0.0165506	0.0169454		0.0350719	0.0371507	0.0214384	0.0309796		0.0217664	0.0242398	0.0216186	0.0226154		19.025	0.109511	0.11581	0.108899	0.111407		0.095341	0.109659	0.105123	0.103374
76.2	0.026626	0.0338394	0.0157189	0.0253948		0.0161891	0.0183291	0.0159949	0.0168377		0.035359	0.0373041	0.0213874	0.0310999		0.0214422	0.0243468	0.0225699	0.0228544		19.05	0.110006	0.115688	0.108672	0.111455		0.0958381	0.109448	0.10539	0.103559
76.3	0.0273713	0.0334701	0.0159196	0.025587		0.0162282	0.018395	0.0163005	0.0169746		0.0348258	0.0372018	0.02083	0.0307101		0.0217664	0.0238299	0.0218817	0.0225509		19.075	0.110128	0.115273	0.108266	0.111223		0.0967363	0.109762	0.105047	0.103848
76.4	0.0271003	0.033361	0.0160283	0.0254965		0.0161205	0.0181127	0.0164302	0.0168878		0.0346617	0.0375769	0.0208164	0.0307895		0.021199	0.024026	0.0220436	0.0224927		19.1	0.110125	0.11537	0.108302	0.111265		0.0956269	0.108664	0.105027	0.103106
76.5	0.0281165	0.0335289	0.0158109	0.0258188		0.0162184	0.0176422	0.0165413	0.0168007		0.0345386	0.0369802	0.0211699	0.030668		0.021584	0.0234378	0.0216186	0.0222667		19.125	0.110118	0.115052	0.108209	0.111127		0.0958854	0.109203	0.10493	0.10334
76.6	0.0280488	0.0331596	0.0156019	0.0256034		0.0164437	0.0181692	0.0157356	0.0167828		0.0341079	0.0353605	0.0207009	0.0298043		0.0209355	0.0240438	0.0218007	0.0223377		19.15	0.109112	0.114969	0.108189	0.110757		0.095555	0.109085	0.104849	0.103163
76.7	0.0275745	0.0329414	0.0155183	0.0253447		0.0167277	0.0175011	0.0153558	0.0165282		0.0348873	0.0343205	0.0203032	0.0295252		0.0213611	0.0233665	0.0214161	0.0221053		19.175	0.109471	0.11516	0.108248	0.11096		0.0951652	0.109021	0.104879	0.103022
76.8	0.027168	0.0324294	0.01505	0.0248825		0.0166396	0.0172753	0.0156244	0.0165131		0.0341284	0.0349513	0.0206975	0.0296648		0.0212598	0.0236338	0.0211327	0.0220794		19.2	0.109438	0.114969	0.108102	0.110837		0.0952605	0.108842	0.104624	0.102909
76.9	0.0259485	0.0321777	0.0151253	0.0244172		0.0162184	0.0172659	0.015504	0.0163294		0.0342515	0.0346615	0.0206329	0.0295758		0.0213408	0.0234021	0.0207886	0.0219115		19.225	0.110002	0.115199	0.108001	0.111067		0.0953284	0.109	0.104768	0.103032
77	0.0247967	0.0317077	0.0149581	0.0238208		0.0159638	0.0173411	0.0158097	0.0163715		0.0343335	0.0351048	0.020779	0.0298079		0.0219894	0.0235091	0.0206874	0.0221246		19.25	0.109902	0.114924	0.108003	0.110943		0.0949364	0.108824	0.104613	0.102791
77.1	0.024187	0.0318419	0.0151337	0.0237209		0.0161107	0.0172471	0.0153929	0.0162502		0.0345181	0.0353435	0.0209116	0.0299932		0.0216651	0.0229922	0.0209303	0.0219115		19.275	0.109667	0.115267	0.107795	0.11091		0.095353	0.109096	0.104666	0.103038
77.2	0.0265583	0.0312712	0.0151838	0.0243378		0.0155231	0.0171436	0.0154948	0.0160538		0.0345181	0.0349854	0.0209252	0.0298717		0.0221312	0.0230813	0.0205457	0.0219696		19.3	0.109689	0.114796	0.108	0.110829		0.0942801	0.109105	0.104708	0.102698
77.3	0.0254065	0.0311789	0.0152507	0.0239454		0.0154937	0.016946	0.0151891	0.0158763		0.0343746	0.0346615	0.0211393	0.0297911		0.021584	0.022707	0.0206672	0.0216984		19.325	0.109751	0.114836	0.107531	0.110706		0.0950808	0.108651	0.104445	0.102726
77.4	0.026626	0.0311286	0.015326	0.0243602		0.0154937	0.0169742	0.0154855	0.0159845		0.0342515	0.0340477	0.020463	0.0292991		0.0211179	0.0223684	0.0210315	0.0215434		19.35	0.109596	0.115256	0.107671	0.110841		0.0947281	0.108379	0.104492	0.102533
77.5	0.024729	0.0310195	0.0149079	0.0235521		0.0152782	0.0168048	0.0153744	0.0158191		0.0340259	0.0339454	0.0207009	0.029281		0.0208747	0.0221901	0.0204243	0.0212076		19.375	0.109387	0.114833	0.107614	0.110611		0.094461	0.108656	0.1046	0.102572
77.6	0.0245935	0.0307341	0.0145066	0.0232781		0.0153174	0.0168895	0.0160597	0.0160889		0.0329594	0.0339284	0.0209014	0.0290332		0.0204288	0.0229031	0.0206065	0.021382		19.4	0.107969	0.11453	0.107693	0.110064		0.093936	0.10801	0.1044	0.102115
77.7	0.0262195	0.0310446	0.0144313	0.0238985		0.0152489	0.016786	0.016282	0.0161056		0.033185	0.0339284	0.0205003	0.0289574		0.0209355	0.0225288	0.0203028	0.0213109		19.425	0.109287	0.114402	0.107981	0.110557		0.0941403	0.108558	0.104222	0.102307
77.8	0.025542	0.0306502	0.0145484	0.0235802		0.015053	0.0169083	0.015291	0.0157508		0.0334311	0.0339113	0.0207756	0.029121		0.0209558	0.0226892	0.0196348	0.0211624		19.45	0.109179	0.114967	0.107313	0.110486		0.0949918	0.108305	0.10416	0.102486
77.9	0.025271	0.03039	0.014724	0.0234617		0.0153174	0.0170118	0.015254	0.0158611		0.033185	0.0336556	0.0205207	0.0288684		0.0209355	0.0224397	0.0199182	0.021156		19.475	0.109042	0.113931	0.107799	0.110257		0.0950762	0.107359	0.104222	0.102219
78	0.0264228	0.0300627	0.0148745	0.0237867		0.0156798	0.0170683	0.0152262	0.0159914		0.033185	0.0342352	0.0205989	0.0291006		0.0208342	0.0216733	0.0199587	0.0208589		19.5	0.109436	0.114277	0.107645	0.110452		0.0948434	0.108174	0.104161	0.102393
78.1	0.0245257	0.0301131	0.0147825	0.0231404		0.0157385	0.017153	0.015504	0.0161318		0.0324056	0.034133	0.0204732	0.0287914		0.021199	0.0216554	0.0209101	0.0212722		19.525	0.109023	0.114317	0.10788	0.110407		0.0949472	0.107807	0.103951	0.102235
78.2	0.0249322	0.0296263	0.0146236	0.0230607		0.0155721	0.0170118	0.0155966	0.0160602		0.0318313	0.0340989	0.0201435	0.0284943		0.0209355	0.0218693	0.020404	0.0211043		19.55	0.108305	0.114339	0.10789	0.110178		0.0940547	0.107864	0.104289	0.102069
78.3	0.0237805	0.0296431	0.014632	0.0226852		0.0154545	0.0164379	0.0157356	0.015876		0.0316672	0.0335362	0.0198784	0.0281539		0.0215232	0.0218158	0.0200194	0.0211495		19.575	0.108094	0.113704	0.107551	0.109783		0.0936884	0.107728	0.103796	0.101737
78.4	0.023916	0.0295004	0.0143477	0.022588		0.0155231	0.0161932	0.0160319	0.0159161		0.0317493	0.0339795	0.019338	0.028143		0.0207126	0.0210316	0.0194931	0.0204391		19.6	0.108914	0.11474	0.107465	0.110373		0.0944856	0.108012	0.103993	0.102164
78.5	0.0241192	0.02945	0.0140634	0.0225442		0.015621	0.0162685	0.0155966	0.0158287		0.0317698	0.0335362	0.0194638	0.0280372		0.0207734	0.0208534	0.0194729	0.0203875		19.625	0.10764	0.114118	0.107377	0.109712		0.093847	0.107348	0.103882	0.101692
78.6	0.023916	0.0291395	0.0137708	0.0222754		0.0158071	0.015751	0.0162357	0.0159313		0.0305187	0.0329054	0.0195147	0.0274658		0.020672	0.0214594	0.0194729	0.0205747		19.65	0.109018	0.11447	0.107363	0.110284		0.0944993	0.107272	0.103792	0.101855
78.7	0.023645	0.029022	0.0135116	0.0220595		0.0153958	0.0156193	0.0157726	0.0155959		0.0307853	0.0332805	0.0193958	0.0276342		0.0204694	0.0210316	0.0192097	0.0202712		19.675	0.109147	0.113582	0.107002	0.10991		0.0937255	0.106885	0.103657	0.101423
78.8	0.0247967	0.028787	0.0129765	0.0221867		0.0153468	0.0157228	0.0158467	0.0156388		0.0308469	0.0334339	0.0196065	0.027781		0.0199222	0.0209425	0.0195539	0.0201744		19.7	0.109394	0.114058	0.107403	0.110285		0.0943612	0.107852	0.103678	0.101964
78.9	0.0249322	0.0284849	0.0125417	0.0219863		0.0150138	0.0153934	0.0152725	0.0152266		0.030047	0.0326326	0.0192225	0.0271277		0.0194966	0.0205147	0.0192907	0.0197998		19.725	0.109033	0.113698	0.107788	0.110173		0.0943092	0.106928	0.103634	0.101624
79	0.024458	0.028275	0.0126755	0.0218028		0.0147494	0.0155534	0.0145501	0.0149509		0.0318929	0.0325474	0.018852	0.0275079		0.0190304	0.0203365	0.0194527	0.0196384		19.75	0.10745	0.113755	0.107118	0.109441		0.0926954	0.107345	0.103312	0.101118
79.1	0.023645	0.0286695	0.012826	0.0217135		0.0145437	0.0153558	0.0143185	0.0147393		0.0326517	0.0323939	0.0186447	0.0276029		0.018848	0.0204256	0.0190883	0.0194963		19.775	0.107714	0.113931	0.107343	0.109663		0.0933973	0.107017	0.10348	0.101298
79.2	0.0237127	0.0285184	0.0124748	0.0215686		0.014387	0.0150547	0.0147446	0.0147288		0.0329184	0.0324621	0.0189302	0.0278062		0.0190912	0.0207821	0.0192502	0.0197546		19.8	0.108298	0.113809	0.107437	0.109848		0.0934441	0.106774	0.103307	0.101175
79.3	0.0246612	0.0281575	0.0126086	0.0218091		0.0146906	0.0148665	0.0152262	0.0149278		0.0319749	0.0318995	0.0186107	0.027218		0.0191723	0.020996	0.0192705	0.0198644		19.825	0.108173	0.113749	0.10741	0.109777		0.0933785	0.107099	0.103374	0.101284
79.4	0.0230352	0.0279645	0.0127006	0.0212334		0.0147788	0.0148853	0.0149761	0.0148801		0.0313596	0.03207	0.0186277	0.0271037		0.0191115	0.0208356	0.0189871	0.0196965		19.85	0.108408	0.11321	0.10695	0.109523		0.0928153	0.106701	0.103203	0.100906
79.5	0.0235772	0.0278218	0.0128176	0.0214055		0.015004	0.015177	0.0147353	0.0149721		0.0313391	0.0310129	0.018485	0.0266742		0.0181387	0.0203543	0.0186835	0.0191153		19.875	0.107712	0.113304	0.107203	0.109406		0.0931103	0.106593	0.103253	0.100986
79.6	0.0233062	0.0276288	0.0128845	0.0212732		0.0148277	0.0146595	0.0143185	0.0146019		0.0315442	0.030689	0.018366	0.026578		0.0183414	0.020283	0.0188859	0.0192186		19.9	0.108344	0.113426	0.107068	0.109613		0.092777	0.106897	0.10329	0.100988
79.7	0.0235772	0.0274945	0.0129514	0.021341		0.0145045	0.0142926	0.0139481	0.0142484		0.0318108	0.0306208	0.0183694	0.0266333		0.0177131	0.0201583	0.0188049	0.0189474		19.925	0.107733	0.113045	0.106643	0.10914		0.0932398	0.106505	0.103011	0.100919
79.8	0.0227642	0.0273267	0.013219	0.0211033		0.0143968	0.014302	0.0142537	0.0143175		0.0307853	0.0308595	0.018468	0.0264517		0.0183211	0.0205326	0.0184608	0.0191669		19.95	0.107493	0.113057	0.107234	0.109261		0.0925088	0.106373	0.102879	0.100587
79.9	0.023374	0.0271756	0.0129096	0.0211531		0.0143772	0.0141044	0.0141796	0.0142204		0.0305392	0.0310129	0.0183014	0.0263747		0.0180576	0.0201939	0.0184405	0.0189538		19.975	0.107879	0.113417	0.106504	0.109267		0.0929984	0.106425	0.10295	0.100791
80	0.0232385	0.0272176	0.0128511	0.0211024		0.0139169	0.0139538	0.0141518	0.0140075		0.029042	0.0314732	0.0179242	0.0259645		0.0177739	0.0202117	0.017975	0.0187213		20	0.108412	0.112637	0.107072	0.109373		0.0925179	0.106632	0.103068	0.100739
80.1	0.0226287	0.0270329	0.0127507	0.0208041		0.013819	0.0139538	0.0138647	0.0138792		0.0296983	0.0312857	0.0177849	0.0260415		0.0184022	0.0200513	0.0177523	0.0187924		20.025	0.108107	0.112821	0.10673	0.109219		0.0926395	0.106318	0.102714	0.100557
80.2	0.0248645	0.0268902	0.0129096	0.0215548		0.0135937	0.0138692	0.0135405	0.0136678		0.0294317	0.0297853	0.0176625	0.0253907		0.0185846	0.0191245	0.0175701	0.0184566		20.05	0.10765	0.113454	0.106797	0.1093		0.0927331	0.106526	0.102715	0.100658
80.3	0.0230352	0.0269154	0.0134447	0.0211318		0.0137896	0.0138786	0.0131238	0.0135973		0.030088	0.0294273	0.0175198	0.0254063		0.0183819	0.0193027	0.0180155	0.0185986		20.075	0.108018	0.113403	0.10629	0.109237		0.0926578	0.106331	0.102479	0.100489
80.4	0.0239837	0.0265965	0.0136036	0.0213946		0.0136133	0.0139068	0.0132627	0.0135943		0.0304777	0.0285407	0.017547	0.0252175		0.0184224	0.0191602	0.0176916	0.0184566		20.1	0.10822	0.112744	0.106843	0.109269		0.0929345	0.106708	0.102282	0.100642
80.5	0.0234417	0.0265126	0.0136119	0.0211887		0.0139267	0.0138221	0.0131608	0.0136365		0.0309084	0.0284896	0.0176489	0.0253618		0.0182806	0.0191245	0.0174082	0.018308		20.125	0.108691	0.113059	0.107074	0.109608		0.0925299	0.106255	0.102471	0.100419
80.6	0.0235772	0.0263195	0.0137206	0.0212058		0.0137602	0.0141891	0.0138091	0.0139195		0.0304572	0.0285578	0.0178494	0.0253245		0.0184427	0.0193027	0.0173475	0.0184049		20.15	0.107161	0.112835	0.106456	0.108817		0.0916231	0.106355	0.102492	0.100157
80.7	0.0229675	0.0263363	0.0134447	0.0209162		0.0139757	0.0138974	0.0133553	0.0137428		0.0304572	0.027944	0.0172921	0.0249107		0.018544	0.018875	0.0175094	0.0183339		20.175	0.107497	0.112727	0.106799	0.109008		0.0920894	0.105859	0.102331	0.100093
80.8	0.0224932	0.0265294	0.0133695	0.0207974		0.0134762	0.0137845	0.0134757	0.0135788		0.0303956	0.0285237	0.0171629	0.0250515		0.0176928	0.0190354	0.0173272	0.0180626		20.2	0.107562	0.11283	0.106418	0.108937		0.0924517	0.106023	0.102264	0.100246
80.9	0.022561	0.0261097	0.0129932	0.0205546		0.0132216	0.0138503	0.0136146	0.0135622		0.0304777	0.0288476	0.0173023	0.0252391		0.017936	0.0191245	0.0171248	0.0181078		20.225	0.107872	0.112861	0.106541	0.109091		0.0922366	0.105625	0.102176	0.100013
81	0.0234417	0.0260678	0.0125584	0.0206893		0.0130257	0.0138315	0.0137443	0.0135338		0.030211	0.0290863	0.0171969	0.0252078		0.0174294	0.0188572	0.0173272	0.0179141		20.25	0.107493	0.112489	0.106536	0.108839		0.0923057	0.105997	0.102314	0.100206
81.1	0.0227642	0.0258496	0.0126588	0.0204242		0.0132313	0.0135587	0.0134757	0.0134219		0.029083	0.0289499	0.0167687	0.0246773		0.0165984	0.018269	0.0165175	0.0171779		20.275	0.107995	0.112688	0.105936	0.108873		0.0916488	0.105626	0.102107	0.0997941
81.2	0.022561	0.0254383	0.0124246	0.0201413		0.0128592	0.0131541	0.0132905	0.0131012		0.0298214	0.0281998	0.0169216	0.0246834		0.0164971	0.0186611	0.016558	0.0173006		20.3	0.107352	0.112299	0.10582	0.10849		0.0919193	0.105442	0.102259	0.0998732
81.3	0.022832	0.0250942	0.0124079	0.0201114		0.0128396	0.01306	0.0132349	0.0130448		0.0289599	0.0279611	0.0174008	0.0245161		0.0163958	0.0186789	0.0165175	0.0172619		20.325	0.107149	0.112398	0.106202	0.108583		0.0911238	0.105553	0.101915	0.0995305
81.4	0.022561	0.0250858	0.0126253	0.0200907		0.0127025	0.0130317	0.012744	0.0128261		0.0293086	0.0277735	0.0167857	0.0243345		0.0160715	0.0183759	0.0162746	0.0169713		20.35	0.107556	0.111961	0.106293	0.108603		0.0921362	0.105405	0.101936	0.0998255
81.5	0.0232385	0.0247837	0.0121069	0.020043		0.0128494	0.0133611	0.013133	0.0131145		0.0277499	0.0273814	0.0168978	0.0237787		0.0161728	0.018875	0.0159508	0.017081		20.375	0.107472	0.112611	0.106051	0.108711		0.0916619	0.105113	0.101866	0.0995471
81.6	0.0219512	0.0245487	0.011831	0.0194436		0.0126535	0.013267	0.0131052	0.0130086		0.0280985	0.0272961	0.0166429	0.0237607		0.0160512	0.0186433	0.0159508	0.0169583		20.4	0.107627	0.112256	0.106427	0.10877		0.0920557	0.10521	0.101654	0.0996399
81.7	0.0200542	0.0244144	0.0116554	0.018708		0.0122618	0.0132764	0.0130312	0.0128564		0.0274217	0.0269892	0.0161569	0.0232819		0.0159904	0.0183581	0.0164568	0.0169971		20.425	0.107025	0.112021	0.105965	0.108337		0.0912853	0.105573	0.101742	0.0995335
81.8	0.0210027	0.0243976	0.0118394	0.0190799		0.0126339	0.0132858	0.0128737	0.0129311		0.0273397	0.0273473	0.0162453	0.0234154		0.015808	0.0183759	0.0159305	0.0167775		20.45	0.107019	0.112163	0.105654	0.108278		0.0923279	0.105183	0.101743	0.0997515
81.9	0.0194444	0.0241794	0.0119146	0.0185128		0.0122814	0.0134834	0.0126329	0.0127992		0.0276063	0.026921	0.0157933	0.0231833		0.015504	0.0179838	0.0157281	0.016474		20.475	0.107126	0.112421	0.105931	0.108493		0.0916231	0.104943	0.101769	0.0994451
82	0.0188347	0.0240703	0.0117725	0.0182258		0.0122226	0.0134081	0.0126236	0.0127514		0.0266833	0.0270574	0.0156369	0.0229054		0.0158891	0.017663	0.0156269	0.0164482		20.5	0.107401	0.111839	0.105697	0.108312		0.0911444	0.104815	0.10169	0.0992167
82.1	0.0197832	0.023936	0.0119313	0.0185502		0.0123205	0.0131446	0.012744	0.0127364		0.0264167	0.0270063	0.0152291	0.0226648		0.0163552	0.0173065	0.0157484	0.0165063		20.525	0.10636	0.111408	0.105468	0.107745		0.091622	0.104659	0.101426	0.0992355
82.2	0.0195799	0.0237933	0.0120568	0.0184767		0.0122324	0.0129941	0.0129385	0.0127217		0.0253297	0.026904	0.0155146	0.022411		0.0168822	0.0177521	0.0156876	0.0168163		20.55	0.10724	0.112083	0.10549	0.108271		0.0910451	0.105028	0.101723	0.0992654
82.3	0.0193089	0.0236758	0.0123912	0.0184586		0.0119973	0.0133987	0.0125495	0.0126485		0.0253092	0.026904	0.0148587	0.0221728		0.0168619	0.01736	0.0153638	0.0165644		20.575	0.106536	0.111831	0.10504	0.107802		0.0902119	0.104779	0.10125	0.0987468
82.4	0.0188347	0.023231	0.012132	0.0180659		0.0116546	0.013107	0.0125218	0.0124278		0.0246119	0.0264266	0.0152257	0.0219298		0.0160918	0.0174669	0.0151816	0.0162996		20.6	0.107066	0.112066	0.105474	0.108202		0.090483	0.104794	0.101496	0.0989243
82.5	0.0199864	0.0230632	0.0120986	0.0183827		0.0117427	0.0129094	0.0123736	0.0123419		0.0256168	0.0259833	0.0156607	0.0222221		0.01672	0.0171283	0.0149387	0.0162996		20.625	0.106073	0.111689	0.105579	0.10778		0.0898872	0.104675	0.101392	0.0986513
82.6	0.0198509	0.0228869	0.0115885	0.0181088		0.0120365	0.0128812	0.0124199	0.0124459		0.0245093	0.0254718	0.0155214	0.0216676		0.0165579	0.0175204	0.0156269	0.0166096		20.65	0.106686	0.111527	0.105081	0.107765		0.090705	0.104343	0.101025	0.0986911
82.7	0.0204607	0.0229541	0.0118226	0.0184125		0.0120855	0.0124201	0.0123921	0.0122992		0.024858	0.0250797	0.0156709	0.0216844		0.0161931	0.0172887	0.0150196	0.0162157		20.675	0.106737	0.111666	0.10471	0.107704		0.0898575	0.104716	0.101076	0.09855
82.8	0.020122	0.0227023	0.0119899	0.0182714		0.011919	0.0124107	0.0123921	0.0122406		0.0236069	0.0246194	0.0154942	0.0210925		0.0153419	0.0171461	0.0149994	0.0158863		20.7	0.107172	0.111586	0.105119	0.107959		0.0911649	0.104206	0.101041	0.098804
82.9	0.0211382	0.0227946	0.011622	0.0185183		0.0123401	0.0119026	0.0122069	0.0121499		0.0244888	0.0253354	0.0152223	0.0215076		0.0156864	0.0167718	0.0143314	0.0156474		20.725	0.106814	0.111308	0.105296	0.107806		0.09054	0.104493	0.100894	0.0986422
83	0.0202575	0.0225176	0.0108193	0.0178648		0.0122618	0.011818	0.0117438	0.0119412		0.0239966	0.0252502	0.0154296	0.0214065		0.0159296	0.0166827	0.0149589	0.0158928		20.75	0.106321	0.11185	0.104978	0.107717		0.0910371	0.104683	0.100987	0.0989024
83.1	0.0189702	0.0223246	0.0107441	0.0173463		0.0120953	0.0117615	0.011753	0.0118699		0.0230326	0.0254718	0.015433	0.0212032		0.0160512	0.0163262	0.014716	0.0157249		20.775	0.106097	0.111865	0.10491	0.107624		0.0900767	0.104279	0.101118	0.0984913
83.2	0.0187669	0.0221819	0.0108109	0.0172532		0.012203	0.0117239	0.0123551	0.012094		0.023935	0.0256764	0.0152223	0.0214655		0.0160107	0.0164154	0.0149792	0.0158282		20.8	0.106552	0.111481	0.105575	0.10787		0.0900259	0.104323	0.100747	0.0983653
83.3	0.0175474	0.021863	0.0111956	0.0168687		0.011537	0.0116956	0.0124384	0.0118904		0.0228685	0.0250286	0.0151272	0.0208904		0.0163147	0.0158094	0.0152828	0.0158024		20.825	0.10586	0.111524	0.104883	0.107422		0.0905492	0.104271	0.100708	0.0985095
83.4	0.0158537	0.0215861	0.0115718	0.0163372		0.011018	0.0116486	0.0120494	0.011572		0.022848	0.0248069	0.0152971	0.0208664		0.016416	0.0160767	0.0153233	0.0159445		20.85	0.106071	0.111081	0.10515	0.107434		0.0893211	0.104506	0.100764	0.0981969
83.5	0.0173442	0.021863	0.0113628	0.0168567		0.0104205	0.012119	0.0122995	0.011613		0.0223147	0.0240567	0.014964	0.0203275		0.015808	0.0157915	0.0143921	0.0153503		20.875	0.105827	0.111538	0.104948	0.107438		0.0902028	0.103968	0.100536	0.0982354
83.6	0.0176829	0.0214014	0.0108109	0.0166317		0.010352	0.0122414	0.0116975	0.0114303		0.0225609	0.0236987	0.0150082	0.020289		0.0155446	0.0159163	0.0147767	0.0154343		20.9	0.106096	0.111144	0.105048	0.107429		0.0900025	0.104288	0.100389	0.0982265
83.7	0.0191057	0.0211077	0.0106855	0.0169663		0.0105968	0.0117521	0.011151	0.0111667		0.0224583	0.0232895	0.014614	0.019975		0.015808	0.0157559	0.0153233	0.0156345		20.925	0.10685	0.111135	0.104796	0.107594		0.0903243	0.104177	0.100517	0.0983394
83.8	0.0191057	0.0210657	0.0106186	0.01693		0.0107046	0.0116674	0.0110029	0.0111249		0.0216174	0.0236476	0.0145766	0.0198415		0.0160107	0.015845	0.0145946	0.0154989		20.95	0.106108	0.11109	0.105321	0.107506		0.0897999	0.103586	0.100759	0.0980483
83.9	0.0186992	0.0208055	0.0106855	0.0167301		0.0105674	0.0115169	0.0109473	0.0110105		0.0214328	0.0233066	0.0147261	0.01972		0.0154838	0.0154529	0.0144529	0.0151437		20.975	0.106023	0.111056	0.104957	0.107345		0.0902924	0.103795	0.100586	0.0982246
84	0.0182927	0.02073	0.0108778	0.0166335		0.011018	0.0114322	0.0105953	0.0110152		0.0226429	0.0247899	0.0147159	0.0205945		0.0149974	0.0152747	0.0143921	0.0149047		21	0.10624	0.110497	0.104598	0.107112		0.0895009	0.103586	0.100198	0.0977614
84.1	0.0189024	0.0204195	0.0106521	0.016658		0.0109396	0.0118085	0.0106324	0.0111268		0.0220481	0.024159	0.0145698	0.0201458		0.0145312	0.0151855	0.014129	0.01464		21.025	0.106498	0.111067	0.104932	0.107499		0.0899562	0.103772	0.100263	0.0979973
84.2	0.0186992	0.0204027	0.0110785	0.0167268		0.0108515	0.0116109	0.0111325	0.0111983		0.0217815	0.0237328	0.0144067	0.0198595		0.0140246	0.0147934	0.0144529	0.0144398		21.05	0.106394	0.1109	0.104878	0.10739		0.0899796	0.103205	0.100225	0.0978031
84.3	0.0189024	0.0203355	0.0109364	0.0167248		0.011253	0.0116486	0.0108547	0.0112521		0.021761	0.0235453	0.0141993	0.019714		0.0143083	0.014437	0.0144529	0.014401		21.075	0.106437	0.11092	0.104002	0.10712		0.0891145	0.103918	0.100168	0.0977337
84.4	0.0188347	0.020453	0.0101922	0.0164933		0.0113216	0.0119967	0.0110492	0.0114558		0.020715	0.0230338	0.0142537	0.019246		0.0137206	0.0147934	0.0140885	0.0142267		21.1	0.106178	0.110809	0.104666	0.107218		0.0899899	0.10359	0.10026	0.0979464
84.5	0.0192412	0.02026	0.0102006	0.0165673		0.0114391	0.0115169	0.0106231	0.011193		0.0213303	0.0220108	0.0139954	0.0189741		0.0140651	0.0149717	0.0144326	0.0145108		21.125	0.106055	0.110392	0.104385	0.106944		0.0887636	0.103509	0.100167	0.09748
84.6	0.0191057	0.0202096	0.0100417	0.0164523		0.011537	0.0114322	0.0105583	0.0111758		0.022848	0.0219256	0.0142537	0.0194806		0.0142475	0.0147578	0.0136027	0.0142267		21.15	0.106039	0.110979	0.104059	0.107026		0.0890107	0.102859	0.100105	0.0973248
84.7	0.0174797	0.0204614	0.0100166	0.0159859		0.011302	0.0115827	0.0106416	0.0111754		0.0218225	0.021721	0.0138051	0.0189489		0.0142475	0.0150964	0.0132788	0.014246		21.175	0.106176	0.110653	0.104218	0.107016		0.0887824	0.10291	0.100074	0.0972557
84.8	0.0172087	0.0203104	0.0101755	0.0158982		0.0111942	0.0113381	0.0108269	0.0111197		0.0225814	0.021738	0.0139037	0.0192123		0.013903	0.0152212	0.0138456	0.0143623		21.2	0.105853	0.110752	0.104224	0.106943		0.0884725	0.103125	0.0997595	0.0971191
84.9	0.0170054	0.0201257	0.0101671	0.0157661		0.0107829	0.0112628	0.0105583	0.010868		0.0222532	0.0214993	0.0138663	0.0190187		0.0141462	0.0152747	0.0132181	0.014259		21.225	0.106073	0.110494	0.104155	0.106907		0.0889062	0.102865	0.0998476	0.0972063
85	0.0168022	0.0200586	0.00994139	0.0156007		0.010587	0.0107171	0.0105027	0.0106023		0.0216994	0.0215675	0.0136997	0.0188214		0.0140246	0.0150786	0.0133193	0.0141815		21.25	0.105828	0.110849	0.104215	0.106964		0.088638	0.103398	0.0997607	0.0972656
85.1	0.0170054	0.0196557	0.00960694	0.0154227		0.0107633	0.0109994	0.0101786	0.0106471		0.0207765	0.0208685	0.0135638	0.018256		0.0134774	0.0150251	0.0128132	0.0138263		21.275	0.106055	0.110604	0.103883	0.106848		0.0893103	0.103351	0.0998605	0.0975073
85.2	0.0174797	0.0197732	0.00962366	0.0156255		0.0104303	0.0106888	0.00959508	0.0102381		0.0213303	0.0202547	0.0127753	0.0179228		0.0133558	0.0150964	0.012793	0.0138069		21.3	0.105527	0.110247	0.104024	0.106599		0.0888954	0.10279	0.0995516	0.097079
85.3	0.0159214	0.0194627	0.00926414	0.0148827		0.0101169	0.0109147	0.00932649	0.0101194		0.020715	0.0203229	0.0130846	0.0178759		0.0127275	0.0143478	0.0130966	0.0134324		21.325	0.105701	0.110284	0.10385	0.106611		0.0888109	0.102768	0.0994894	0.0970228
85.4	0.0176829	0.0195214	0.00948153	0.0155619		0.00990147	0.0112252	0.00910421	0.010077		0.0211457	0.0198455	0.01302	0.0178109		0.0126667	0.0142587	0.012793	0.0132838		21.35	0.106422	0.109909	0.103971	0.106767		0.0886831	0.102468	0.0995082	0.0968864
85.5	0.0157182	0.0188332	0.00962366	0.014725		0.0100386	0.0110276	0.00900233	0.0100228		0.0202432	0.0204934	0.01319	0.017835		0.0132747	0.0138666	0.0129145	0.0133742		21.375	0.105301	0.109991	0.10415	0.106481		0.088569	0.102885	0.0995798	0.0970113
85.6	0.0153794	0.0185059	0.00966547	0.0145169		0.00955869	0.0109899	0.00909495	0.0098812		0.0204278	0.0201524	0.0129045	0.0176677		0.012991	0.01433	0.0130562	0.0134969		21.4	0.105965	0.110176	0.103855	0.106665		0.0889604	0.102299	0.0994295	0.0968964
85.7	0.0158537	0.018187	0.0094648	0.0145018		0.00941179	0.0107359	0.00942837	0.00985868		0.0201407	0.0202888	0.0128501	0.0176124		0.0130112	0.014027	0.0122667	0.0131418		21.425	0.105726	0.11019	0.103345	0.10642		0.0883584	0.102911	0.0992756	0.0968484
85.8	0.0138211	0.0183549	0.00947317	0.0138831		0.00899066	0.0105665	0.009132	0.00956306		0.0195459	0.0202888	0.0128263	0.0174296		0.0134976	0.0139914	0.0126918	0.0134194		21.45	0.105633	0.11023	0.103691	0.106518		0.0880194	0.102834	0.0992204	0.0966912
85.9	0.0156504	0.0180192	0.00918053	0.0142834		0.0092355	0.0103501	0.00907643	0.00955401		0.0194434	0.0199478	0.0120854	0.0170169		0.012768	0.0135101	0.0118619	0.0127478		21.475	0.104722	0.110034	0.10373	0.106162		0.0886517	0.102489	0.0993367	0.0968259
86	0.0156504	0.0181031	0.00913872	0.0142974		0.00917674	0.0101996	0.0092524	0.0095429		0.0204894	0.0200501	0.0123097	0.0174392		0.013072	0.0136706	0.0122667	0.013032		21.5	0.105106	0.109818	0.103746	0.106224		0.0890723	0.10262	0.0990983	0.09693
86.1	0.0155827	0.0184052	0.00875411	0.0142473		0.00896128	0.010002	0.00929871	0.00942065		0.0204278	0.019675	0.0123777	0.0173129		0.0125451	0.0137775	0.0124286	0.0129545		21.525	0.104988	0.110037	0.103415	0.106147		0.0877232	0.102783	0.0991429	0.0965498
86.2	0.0153117	0.0183716	0.00852	0.0140678		0.00931385	0.0100678	0.0099285	0.00977006		0.0206945	0.0190442	0.0117184	0.0169351		0.0124843	0.0135458	0.0125906	0.0129028		21.55	0.105615	0.110309	0.103476	0.106467		0.0880274	0.102199	0.0992404	0.096489
86.3	0.0146341	0.0181702	0.00834441	0.0137162		0.00906901	0.0102748	0.0101693	0.00983772		0.0215764	0.0191465	0.0123641	0.0174584		0.0122411	0.013528	0.0117404	0.0125476		21.575	0.105139	0.109835	0.103633	0.106203		0.0881781	0.102751	0.099076	0.0966684
86.4	0.0148374	0.017759	0.00845311	0.0136832		0.00890251	0.0103031	0.00971548	0.00964036		0.0197715	0.0194022	0.0125272	0.0170771		0.0117142	0.0135636	0.0113963	0.0122829		21.6	0.105203	0.10998	0.103755	0.106313		0.0879726	0.102576	0.0989421	0.0964969
86.5	0.0159892	0.0174401	0.00895477	0.014128		0.00886334	0.0101337	0.00966917	0.00955541		0.0211457	0.0194363	0.0121908	0.017373		0.0116128	0.0133319	0.0113558	0.0121537		21.625	0.105307	0.109492	0.103624	0.106141		0.0880554	0.102053	0.09882	0.0963095
86.6	0.0159892	0.0173142	0.0087123	0.0140052		0.00854014	0.0102466	0.00921535	0.00933404		0.0200587	0.0190954	0.0124457	0.0170242		0.0110859	0.013118	0.0117202	0.0120245		21.65	0.104733	0.109693	0.103514	0.10598		0.0867086	0.102096	0.0987589	0.0958545
86.7	0.0149729	0.017096	0.008821	0.01363		0.00841283	0.0101243	0.00902086	0.00918599		0.0199356	0.0191124	0.0122384	0.0169207		0.0108427	0.0129576	0.0113153	0.0117598		21.675	0.10532	0.109767	0.103337	0.106142		0.08718	0.102142	0.0987976	0.0960399
86.8	0.0138211	0.0167267	0.0085618	0.0130365		0.00814839	0.0101149	0.00877079	0.00901136		0.0195869	0.0187203	0.0122316	0.0166777		0.0109846	0.0130646	0.0113356	0.0118502		21.7	0.104055	0.10937	0.103834	0.105753		0.0878916	0.101636	0.0989069	0.0961449
86.9	0.0144986	0.0165924	0.00862033	0.0132371		0.00786438	0.0101337	0.00861334	0.00887048		0.0202638	0.0177314	0.0115518	0.0162868		0.0106603	0.012922	0.0112546	0.0116694		21.725	0.104656	0.109415	0.103409	0.105827		0.0874653	0.101368	0.0984477	0.0957603
87	0.0151762	0.0165756	0.00821063	0.0133208		0.00768809	0.00981379	0.00890046	0.00880078		0.0195459	0.0174757	0.0111746	0.0158525		0.0104779	0.0121912	0.011457	0.011411		21.75	0.104405	0.109679	0.103605	0.105897		0.0877147	0.101983	0.0990713	0.0962562
87.1	0.0150407	0.0164497	0.00792636	0.0131389		0.00786438	0.00988907	0.00886341	0.00887228		0.0183563	0.017578	0.0114601	0.0156408		0.0106603	0.0125655	0.0106878	0.0113594		21.775	0.104691	0.109154	0.10362	0.105822		0.0873769	0.102261	0.0986591	0.0960991
87.2	0.0157182	0.0166344	0.00793472	0.0134291		0.00809943	0.00962561	0.00878932	0.00883812		0.0177	0.0177144	0.0112222	0.0154122		0.0108832	0.0123694	0.0108498	0.011411		21.8	0.104001	0.109728	0.103714	0.105814		0.0875247	0.10169	0.0985052	0.0959066
87.3	0.0153117	0.0164497	0.0081103	0.0132906		0.00780561	0.0095127	0.00880784	0.00870872		0.0178641	0.0172029	0.0112358	0.0152847		0.0103968	0.0129398	0.0110927	0.0115402		21.825	0.103984	0.109177	0.103466	0.105542		0.0872787	0.101886	0.0984735	0.0958795
87.4	0.0144309	0.0164665	0.00777586	0.0128911		0.00795252	0.00942801	0.00852999	0.00863684		0.0179667	0.0168278	0.0110047	0.0151006		0.011167	0.0125833	0.0107486	0.0115467		21.85	0.104218	0.10912	0.103197	0.105512		0.0875195	0.102279	0.0984489	0.0960826
87.5	0.0144986	0.0160385	0.00713205	0.0125564		0.00840303	0.00939979	0.00883562	0.00887948		0.0184384	0.0164868	0.0109163	0.0150874		0.0108022	0.0126368	0.0110319	0.0115402		21.875	0.103776	0.109307	0.103112	0.105399		0.0873295	0.101502	0.0984406	0.0957575
87.6	0.0140244	0.0159462	0.00747485	0.0124818		0.00838344	0.00894815	0.00902086	0.00878415		0.0183153	0.015515	0.0109571	0.0147229		0.0109035	0.012209	0.0111534	0.0114562		21.9	0.104309	0.1087	0.103426	0.105478		0.0882277	0.10178	0.0981177	0.0960418
87.7	0.0145664	0.0158035	0.00767552	0.0126818		0.00837365	0.00867528	0.00908569	0.00871154		0.0183768	0.0153786	0.0109163	0.0146784		0.0105387	0.0123694	0.0112546	0.0114304		21.925	0.104237	0.10939	0.10315	0.105592		0.0872302	0.101571	0.0981353	0.0956453
87.8	0.0157182	0.0158454	0.0078093	0.0131243		0.00856953	0.00841182	0.00841885	0.00846673		0.0181923	0.0156855	0.0105662	0.0146086		0.01064	0.0122803	0.0111939	0.011411		21.95	0.104425	0.108794	0.102687	0.105302		0.0866612	0.10123	0.0979063	0.0952658
87.9	0.0147019	0.015451	0.00801833	0.0127237		0.00850097	0.00844005	0.0080206	0.00832054		0.0179872	0.0164697	0.0103385	0.0147446		0.0104982	0.0116565	0.0108093	0.0110171		21.975	0.104954	0.109075	0.102686	0.105571		0.0882283	0.101141	0.0981529	0.0958407
88	0.0140244	0.0157951	0.00779258	0.0125374		0.00825613	0.00870351	0.00790946	0.0082897		0.0171257	0.0166573	0.0106274	0.0146604		0.0101739	0.0117456	0.0109105	0.0109784		22	0.104318	0.108604	0.102341	0.105088		0.0871583	0.100693	0.0980683	0.0953067
88.1	0.0130759	0.0155601	0.00732435	0.0119868		0.00808963	0.00875055	0.00821509	0.00835176		0.017741	0.0169983	0.0104541	0.0148998		0.0109238	0.0118347	0.0105664	0.0111398		22.025	0.103231	0.108618	0.102689	0.104846		0.0866584	0.101172	0.0982198	0.0953501
88.2	0.0119241	0.0151908	0.00702335	0.0113794		0.00740407	0.00858119	0.00781684	0.00793403		0.0169206	0.0163163	0.0101176	0.0142995		0.0108022	0.0116565	0.0104652	0.0110042		22.05	0.103972	0.108587	0.102697	0.105085		0.0873934	0.10078	0.0980073	0.0953937
88.3	0.0123984	0.0149978	0.00718221	0.0115261		0.00754118	0.0087976	0.00740007	0.00791295		0.0174334	0.0170324	0.00999528	0.0146592		0.0111872	0.0115139	0.0103235	0.01103		22.075	0.103834	0.108425	0.102927	0.105062		0.0865671	0.10122	0.0980942	0.0952937
88.4	0.0111111	0.0148887	0.0073996	0.0111331		0.0073551	0.00871292	0.00702034	0.00769612		0.016613	0.016572	0.00959084	0.014113		0.0110859	0.0111396	0.0105056	0.0109202		22.1	0.104435	0.108328	0.102725	0.105163		0.0868787	0.101028	0.0978851	0.0952639
88.5	0.0108401	0.0149222	0.00734108	0.0110345		0.00700253	0.00829891	0.00696477	0.00742207		0.0161413	0.0156684	0.00980835	0.0137329		0.0108832	0.0110149	0.0105866	0.0108363		22.125	0.103691	0.108459	0.102439	0.104863		0.0869083	0.100356	0.0975915	0.0949519
88.6	0.0108401	0.0149222	0.00724074	0.011001		0.00694376	0.00833655	0.00696477	0.00741503		0.0154234	0.0148841	0.010223	0.0133925		0.010559	0.0111753	0.0105056	0.0107653		22.15	0.104401	0.108325	0.102508	0.105078		0.087616	0.100814	0.0977689	0.0953996
88.7	0.0105691	0.0143935	0.00663874	0.0105338		0.0073649	0.00792254	0.00705739	0.00744827		0.0158336	0.0148671	0.0100497	0.0134454		0.0102752	0.0114604	0.0103437	0.0107265		22.175	0.103407	0.108533	0.102279	0.104739		0.0866972	0.100521	0.0976056	0.0949413
88.8	0.0105691	0.0145949	0.00673071	0.0106316		0.00760974	0.00799782	0.00731671	0.00764142		0.0150953	0.0146455	0.0103555	0.0132589		0.010559	0.0109257	0.00991863	0.0104876		22.2	0.104073	0.107905	0.102596	0.104858		0.0864838	0.100517	0.0976185	0.094873
88.9	0.0113144	0.0145362	0.00717385	0.0110081		0.00759015	0.00800723	0.00786315	0.00782018		0.0151978	0.014134	0.00940052	0.0127705		0.0101334	0.010801	0.0100198	0.010339		22.225	0.104681	0.108365	0.102331	0.105126		0.0863074	0.100769	0.0977008	0.0949256
89	0.0125339	0.0145362	0.00748322	0.0115178		0.00743345	0.00810132	0.00792798	0.00782092		0.0151773	0.0140999	0.00948209	0.0127814		0.00966722	0.0109614	0.00965548	0.0101324		22.25	0.103482	0.108104	0.102198	0.104595		0.0861048	0.0999879	0.0973919	0.0944949
89.1	0.0121274	0.0141417	0.00778422	0.0113511		0.00745304	0.00828009	0.00806691	0.00793335		0.014439	0.0144579	0.00923399	0.0126033		0.00944429	0.011104	0.0100603	0.0102422		22.275	0.103904	0.108249	0.102232	0.104795		0.0860974	0.10037	0.0975669	0.0946782
89.2	0.0115176	0.0137892	0.00765044	0.0109857		0.00731593	0.00781904	0.00799281	0.00770926		0.0137621	0.0142874	0.00946509	0.0124265		0.0100118	0.010498	0.00945306	0.0100097		22.3	0.104254	0.108167	0.101974	0.104798		0.086732	0.099924	0.0974706	0.0947088
89.3	0.0120596	0.0136801	0.00701499	0.0109182		0.00686541	0.00768731	0.0078261	0.00745961		0.0126956	0.0142704	0.00910824	0.0119814		0.00954562	0.0103019	0.00941257	0.0097772		22.325	0.104131	0.10824	0.102591	0.104988		0.0864358	0.100453	0.0975457	0.0948114
89.4	0.0114499	0.0137137	0.00641299	0.0105255		0.00699273	0.0073674	0.00744637	0.00726884		0.0125726	0.0153274	0.00954666	0.0124734		0.00968749	0.0103376	0.00973645	0.00993865		22.35	0.103727	0.108291	0.101735	0.104585		0.0861927	0.100515	0.0974107	0.0947063
89.5	0.0101626	0.0135458	0.00650496	0.0100711		0.00667933	0.0073674	0.00728893	0.00711189		0.0129622	0.0151569	0.00878198	0.0122569		0.00930242	0.0100702	0.00971621	0.00971263		22.375	0.103832	0.10849	0.101436	0.104586		0.0859622	0.100196	0.0974377	0.0945318
89.6	0.0106369	0.0132521	0.00653841	0.0101425		0.00697315	0.00774377	0.00677027	0.0071624		0.0133929	0.0149523	0.00908785	0.0124193		0.00926189	0.00980287	0.0094733	0.00952535		22.4	0.103088	0.10803	0.102329	0.104482		0.0861733	0.100211	0.0971394	0.094508
89.7	0.0104336	0.0129667	0.00666382	0.0100214		0.00706129	0.00748972	0.00713148	0.0072275		0.0131673	0.0147989	0.00875479	0.0121811		0.00901869	0.00925035	0.00918991	0.00915725		22.425	0.103704	0.107934	0.102055	0.104564		0.0854183	0.0998574	0.0971852	0.0941536
89.8	0.0115176	0.0128241	0.00647988	0.0102739		0.00654222	0.00758381	0.00670544	0.00694383		0.0134955	0.0143215	0.00892132	0.0121679		0.00883629	0.00928599	0.00906846	0.0090733		22.45	0.102508	0.107678	0.101837	0.104008		0.0870984	0.0998878	0.0968517	0.0946126
89.9	0.0113821	0.0128912	0.00632102	0.0101981		0.00667933	0.0076685	0.00665913	0.00700232		0.0135365	0.0134349	0.00865283	0.0117721		0.00869442	0.00917905	0.00914943	0.00901518		22.475	0.103548	0.10792	0.102085	0.104518		0.0859662	0.100318	0.0967366	0.0943401
90	0.0109079	0.0124548	0.0064548	0.00993917		0.00605253	0.00770613	0.00669618	0.00681828		0.012429	0.0127871	0.00858146	0.0111935		0.00847148	0.00955335	0.00898749	0.00902809		22.5	0.103679	0.10767	0.102271	0.10454		0.0853658	0.099761	0.0970055	0.0940441
90.1	0.0115176	0.01248	0.0061538	0.0100505		0.00606233	0.00759322	0.00673323	0.00679626		0.0117932	0.0122244	0.00886354	0.0109084		0.00826882	0.00930382	0.00829926	0.00865354		22.525	0.102522	0.107778	0.101762	0.104021		0.0859034	0.100022	0.0971053	0.0943436
90.2	0.0115176	0.0122114	0.00578591	0.0098383		0.0059546	0.00791313	0.00641833	0.00676202		0.0119983	0.0118153	0.00881256	0.0108061		0.00810668	0.00926817	0.00835999	0.00860833		22.55	0.103357	0.107517	0.101553	0.104142		0.0851912	0.100058	0.0968235	0.0940242
90.3	0.0119919	0.0123289	0.00606182	0.0101275		0.00592521	0.00795077	0.00649242	0.00678947		0.0120803	0.0121733	0.00876158	0.0109384		0.00839042	0.00941076	0.00763127	0.00851792		22.575	0.10285	0.107463	0.101141	0.103818		0.0855382	0.0996734	0.0966579	0.0939565
90.4	0.0098916	0.0119344	0.00581099	0.00921233		0.00596439	0.00774377	0.00656652	0.00675823		0.0124495	0.0122244	0.00843192	0.0109481		0.00814722	0.00930382	0.00767175	0.00841459		22.6	0.103576	0.107738	0.101356	0.104223		0.0857225	0.0995665	0.0967225	0.0940038
90.5	0.00901084	0.0120351	0.00567721	0.00890772		0.00544532	0.00759322	0.00675175	0.00659676		0.0126546	0.0115936	0.00789494	0.0105956		0.00843095	0.00928599	0.00791466	0.00857604		22.625	0.103999	0.107077	0.101645	0.10424		0.0849995	0.100097	0.0967331	0.0939432
90.6	0.0102981	0.0118337	0.00572738	0.00928639		0.00535718	0.00729213	0.00632571	0.00632501		0.0133519	0.0118494	0.00829258	0.0110311		0.00792428	0.00928599	0.0083195	0.00854375		22.65	0.10293	0.107338	0.101109	0.103792		0.0857904	0.0996297	0.096719	0.0940464
90.7	0.00826558	0.0114225	0.00568557	0.00845788		0.00520048	0.00713217	0.00610343	0.00614536		0.0142749	0.011713	0.00821101	0.0112247		0.00826882	0.00916123	0.00787418	0.00846626		22.675	0.102945	0.107273	0.101076	0.103764		0.0857391	0.100085	0.0964688	0.0940978
90.8	0.00941734	0.0115316	0.00579427	0.0089144		0.00521027	0.00697221	0.00641833	0.00620027		0.0137211	0.0124631	0.00843192	0.0114052		0.00822828	0.00901864	0.00777296	0.00836939		22.7	0.102769	0.107204	0.100814	0.103596		0.086187	0.0997738	0.0964171	0.094126
90.9	0.00785908	0.0114644	0.00612871	0.00848406		0.00527883	0.0065488	0.00624236	0.00602333		0.0132699	0.011713	0.00856786	0.0110563		0.00790402	0.00894735	0.00761103	0.00818857		22.725	0.103439	0.107483	0.100888	0.103937		0.0854252	0.100228	0.0966109	0.0940879
91	0.00731707	0.0114141	0.00581935	0.00818351		0.00529842	0.00630416	0.00646464	0.00602241		0.0132699	0.0109287	0.00796631	0.0105667		0.00802562	0.008983	0.00759079	0.00823377		22.75	0.101996	0.106827	0.100942	0.103255		0.0853784	0.0996429	0.0965675	0.0938629
91.1	0.00691057	0.0113302	0.00600329	0.00808135		0.0054747	0.00597484	0.00641833	0.00595596		0.013475	0.0107582	0.0077488	0.0104897		0.00786348	0.00892953	0.00759079	0.00816274		22.775	0.102917	0.106597	0.100478	0.103331		0.0850794	0.100217	0.0961752	0.0938239
91.2	0.00873984	0.0109189	0.0060451	0.00856795		0.0056412	0.00585252	0.00663135	0.00604169		0.0133724	0.0100762	0.0075143	0.0101361		0.00768108	0.00855523	0.00757054	0.00796254		22.8	0.102392	0.107142	0.100702	0.103412		0.085529	0.0997648	0.096443	0.0939123
91.3	0.00806233	0.0105496	0.00565213	0.00808802		0.00589583	0.00557965	0.00636276	0.00594608		0.0123469	0.0102297	0.00777939	0.00998329		0.00828908	0.00866218	0.00779321	0.00826606		22.825	0.102715	0.106921	0.10092	0.103518		0.0847821	0.0992034	0.0959838	0.0933231
91.4	0.00826558	0.0106504	0.00555179	0.00815592		0.00591542	0.00554202	0.006159	0.00587215		0.0127777	0.0103149	0.0072628	0.00995683		0.00760002	0.00844829	0.007692	0.00793671		22.85	0.102696	0.107383	0.101028	0.103702		0.0846554	0.0992264	0.0961177	0.0933331
91.5	0.00785908	0.0106252	0.00481601	0.00776676		0.00507316	0.00563611	0.00587189	0.00552705		0.0126546	0.011031	0.00729679	0.0101854		0.00786348	0.00798489	0.00771224	0.00785922		22.875	0.102805	0.106725	0.100619	0.103383		0.0838547	0.0992546	0.0960378	0.093049
91.6	0.00826558	0.0102895	0.00469896	0.00775135		0.00529842	0.00560788	0.00549216	0.00546615		0.0117932	0.010707	0.00706568	0.00973669		0.00755948	0.00778883	0.00728715	0.0075557		22.9	0.10249	0.106435	0.100703	0.103209		0.0848585	0.0993351	0.095945	0.0933795
91.7	0.0100949	0.00988661	0.00472404	0.00823518		0.0053278	0.00569256	0.00544586	0.00548874		0.012552	0.0105706	0.00708268	0.00991713		0.00747842	0.00851959	0.00708473	0.00773006		22.925	0.102862	0.106495	0.100724	0.10336		0.0844573	0.0990947	0.0960002	0.0931841
91.8	0.00921409	0.00934109	0.0048829	0.00781269		0.00519068	0.00577725	0.00526988	0.00541261		0.012511	0.0107582	0.00756868	0.0101433		0.00723522	0.00794924	0.00738836	0.00754278		22.95	0.10228	0.107108	0.100763	0.103384		0.0847113	0.0993227	0.0957771	0.0932704
91.9	0.00914634	0.00906413	0.00475749	0.00765599		0.00471079	0.00532561	0.00499203	0.00500948		0.012429	0.0105195	0.0072662	0.00992796		0.00711362	0.00791359	0.00773248	0.0076009		22.975	0.102532	0.106648	0.100504	0.103228		0.084374	0.0992226	0.0956127	0.0930698
92	0.0094851	0.00888788	0.00431435	0.00756244		0.00479893	0.00556084	0.00476049	0.00504009		0.0115881	0.00976932	0.00712686	0.00936738		0.00605975	0.00737889	0.00712522	0.00687762		23	0.103653	0.106396	0.100195	0.103414		0.0847632	0.0992444	0.0959826	0.0933301
92.1	0.00941734	0.0089802	0.00419729	0.00753161		0.00481852	0.00514683	0.0048068	0.00492405		0.0120393	0.00944538	0.00725261	0.00942993		0.00583681	0.00768189	0.00750982	0.00703907		23.025	0.102636	0.106597	0.100146	0.103127		0.0841275	0.0988595	0.0957489	0.092912
92.2	0.00806233	0.00919002	0.00428926	0.00718054		0.0048479	0.00532561	0.00479754	0.00499035		0.010337	0.00860996	0.00684138	0.00849043		0.00608001	0.0078423	0.00728715	0.00710365		23.05	0.102361	0.10675	0.100588	0.103233		0.084854	0.0993667	0.0959591	0.0933933
92.3	0.00711382	0.00958448	0.00471568	0.00713799		0.00508295	0.00527856	0.00529767	0.00521973		0.0105216	0.00888275	0.00660348	0.00855659		0.00593815	0.00721848	0.00773248	0.00697449		23.075	0.102951	0.106322	0.100308	0.103194		0.0841709	0.0988625	0.0954976	0.0928437
92.4	0.00738482	0.00950894	0.00524243	0.00737873		0.00503398	0.00529738	0.0050476	0.00512632		0.00980372	0.00925784	0.00628741	0.00836652		0.00573548	0.00707589	0.00732764	0.00672909		23.1	0.102728	0.10601	0.0999682	0.102902		0.0843729	0.0985653	0.0959145	0.0929509
92.5	0.00616531	0.00957608	0.00499996	0.00691378		0.00512213	0.00508097	0.0048068	0.0050033		0.00990627	0.00999096	0.00649132	0.00872741		0.00579628	0.00712936	0.00744909	0.00680659		23.125	0.102601	0.106166	0.0997468	0.102838		0.0852557	0.0984859	0.0955269	0.0930895
92.6	0.00677507	0.00976912	0.00464879	0.00706433		0.00529842	0.00549497	0.00474197	0.00517845		0.00998831	0.00978637	0.00635198	0.00862997		0.00565441	0.00769971	0.00688231	0.00678721		23.15	0.101792	0.106194	0.0998683	0.102618		0.0841361	0.0989995	0.0956444	0.0929266
92.7	0.00752033	0.00955091	0.0044314	0.00716755		0.00522986	0.00542911	0.00433446	0.00499781		0.00974219	0.00946243	0.00652871	0.00850607		0.00618135	0.00750365	0.00694304	0.00690345		23.175	0.10247	0.106586	0.100231	0.103096		0.0837726	0.0983877	0.0953531	0.0925045
92.8	0.00731707	0.00956769	0.00431435	0.00706637		0.00503398	0.00497746	0.00450117	0.00483754		0.0109318	0.00849061	0.00611408	0.00836532		0.00597868	0.00736107	0.00619408	0.00654827		23.2	0.102721	0.106214	0.0996374	0.102857		0.084592	0.0983519	0.0954894	0.0928111
92.9	0.00758808	0.00939984	0.00450665	0.00716486		0.00491646	0.00520329	0.00463083	0.00491686		0.0100703	0.00779159	0.0060495	0.00784324		0.00597868	0.00707589	0.00667989	0.00659994		23.225	0.102469	0.10589	0.0994884	0.102616		0.0838758	0.0988369	0.0954025	0.0927051
93	0.00670732	0.00893824	0.00427254	0.00663937		0.00462265	0.00492101	0.00436224	0.0046353		0.0101729	0.00743355	0.00600532	0.00773137		0.00577601	0.00695113	0.00663941	0.00647724		23.25	0.10211	0.105978	0.0998772	0.102655		0.0838273	0.0984253	0.0953801	0.0925442
93.1	0.00731707	0.00873681	0.00456518	0.00687302		0.00442677	0.00467637	0.00450117	0.00453477		0.00980372	0.00823487	0.00554311	0.00774219		0.00599895	0.00654119	0.00643699	0.00633516		23.275	0.102473	0.105907	0.0989483	0.102443		0.0838325	0.0985178	0.09515	0.0925001
93.2	0.00752033	0.00841789	0.00426418	0.00673413		0.00450512	0.00498687	0.00426036	0.00458412		0.00970117	0.00867816	0.00573343	0.00793587		0.00579628	0.00618472	0.00609287	0.00603164		23.3	0.103067	0.105814	0.0993228	0.102734		0.084745	0.0988798	0.0950454	0.0928901
93.3	0.00663957	0.00816611	0.00419729	0.00633432		0.00433863	0.00524092	0.00439929	0.00465961		0.00920893	0.00927489	0.00571644	0.00799602		0.00593815	0.00622037	0.00621432	0.00612851		23.325	0.102745	0.10599	0.0996076	0.102781		0.0847952	0.0989077	0.0950548	0.0929192
93.4	0.00663957	0.00830879	0.00430598	0.00641811		0.00451492	0.00526915	0.00422332	0.00466913		0.00906536	0.00922374	0.00576742	0.00795391		0.00618135	0.00629166	0.0056273	0.00604456		23.35	0.10227	0.10553	0.0998521	0.102551		0.084519	0.0982815	0.0950654	0.092622
93.5	0.00589431	0.00827521	0.00422237	0.00613063		0.00440718	0.00532561	0.00466788	0.00480022		0.00941403	0.00871226	0.0060665	0.00798158		0.00656641	0.00588172	0.00546537	0.00596706		23.375	0.102351	0.105578	0.0993174	0.102415		0.0848094	0.0984802	0.0949985	0.0927627
93.6	0.00643631	0.00802343	0.0040886	0.00618278		0.00399585	0.00539147	0.00463083	0.00467272		0.00912689	0.00866111	0.00537658	0.00763513		0.00660695	0.00554308	0.00508077	0.00573458		23.4	0.101617	0.10538	0.099653	0.102217		0.0833811	0.0980099	0.0953179	0.0922363
93.7	0.00555556	0.00819129	0.0039799	0.00590892		0.00408399	0.0051186	0.00394547	0.00438269		0.0081014	0.00813258	0.00587957	0.00732597		0.00626241	0.00575696	0.00504028	0.00568938		23.425	0.102141	0.10589	0.0994047	0.102479		0.0836299	0.0982304	0.0946579	0.0921727
93.8	0.00555556	0.0080654	0.00388793	0.0058363		0.00415255	0.00503392	0.00366762	0.0042847		0.00787579	0.00809848	0.00563148	0.00715996		0.00587735	0.00630949	0.00506052	0.00577333		23.45	0.101525	0.104925	0.0995914	0.102014		0.0842297	0.0978323	0.0946685	0.0922435
93.9	0.00474255	0.00812415	0.00388793	0.00558488		0.00408399	0.00492101	0.00348238	0.00416246		0.00658367	0.00733125	0.00540377	0.00642977		0.00605975	0.00568567	0.00453423	0.00543752		23.475	0.102157	0.105754	0.0997792	0.102564		0.0833155	0.0977743	0.0948998	0.0919965
94	0.00643631	0.00790593	0.00364545	0.0059959		0.0042211	0.00425296	0.00364909	0.00404105		0.00680928	0.00687092	0.0053222	0.00630467		0.00520854	0.00504402	0.00556658	0.00526316		23.5	0.101479	0.10513	0.098713	0.101774		0.0832943	0.0979918	0.0946215	0.0919692
94.1	0.00596206	0.00767094	0.00366218	0.00576506		0.00361389	0.00431882	0.00352869	0.00382047		0.00637857	0.00664928	0.00541397	0.00613264		0.00575575	0.00490144	0.00502004	0.00521149		23.525	0.102266	0.105152	0.0996197	0.102346		0.0836282	0.0978582	0.0948258	0.0921041
94.2	0.00582656	0.00786397	0.00354512	0.00574522		0.0035943	0.00417768	0.00349165	0.00375454		0.00594786	0.00620599	0.00526783	0.00579822		0.00553281	0.00506185	0.0048581	0.00514692		23.55	0.103052	0.105266	0.0997865	0.102702		0.0833286	0.0973796	0.0945498	0.0917527
94.3	0.0049458	0.00784719	0.00338626	0.00539308		0.00369224	0.00379191	0.00370466	0.0037296		0.00580429	0.00615484	0.00522704	0.00572364		0.00530988	0.00483014	0.00459496	0.00490798		23.575	0.102	0.105382	0.0999143	0.102432		0.0833491	0.097552	0.0945945	0.0918318
94.4	0.00630081	0.00734362	0.0034197	0.00568804		0.003751	0.00380132	0.00306561	0.00353931		0.00465574	0.00646173	0.00489738	0.00537839		0.00559361	0.00500838	0.00439253	0.00499839		23.6	0.101121	0.105215	0.0994804	0.101939		0.083643	0.0974436	0.0943114	0.0917993
94.5	0.00677507	0.00701631	0.00328593	0.00569244		0.00364327	0.00370722	0.00280628	0.00338559		0.00541461	0.00658108	0.00495516	0.00566349		0.00587735	0.00490144	0.00427108	0.0050113		23.625	0.101955	0.105348	0.0991253	0.102143		0.0834695	0.0974124	0.0945252	0.0918023
94.6	0.00657182	0.00677292	0.00346987	0.00560487		0.00350616	0.00422473	0.00278776	0.00350622		0.00467625	0.00661518	0.00470026	0.00536877		0.00547201	0.00456279	0.00410915	0.00470778		23.65	0.102054	0.105127	0.0996365	0.102272		0.0833765	0.0979151	0.0941987	0.0918301
94.7	0.0049458	0.00641203	0.00364545	0.00500109		0.0032907	0.00382013	0.00260253	0.00323779		0.00484033	0.00670042	0.00454053	0.00539042		0.00518828	0.00463409	0.00412939	0.00464966		23.675	0.101773	0.105456	0.100057	0.102429		0.0830358	0.0978455	0.0944066	0.0917626
94.8	0.00528455	0.00664703	0.00389629	0.00527596		0.00320255	0.00413064	0.00276924	0.00336748		0.00342515	0.00624009	0.00373506	0.00452791		0.00464108	0.00425979	0.00398769	0.00429448		23.7	0.101776	0.105541	0.0993082	0.102208		0.0825005	0.0978112	0.0943796	0.0915638
94.9	0.00487805	0.00669738	0.00399662	0.00519068		0.00295771	0.00392363	0.00302856	0.0033033		0.00455319	0.00613779	0.00449634	0.00509209		0.00431681	0.00452715	0.00382576	0.00423636		23.725	0.101838	0.105124	0.0993549	0.102106		0.0830256	0.0973168	0.0943455	0.0915626
95	0.00399729	0.00682328	0.00400498	0.00494185		0.00276184	0.00372604	0.00328789	0.00325859		0.00305597	0.00630829	0.00403414	0.00454956		0.00431681	0.0044202	0.00350188	0.00409428		23.75	0.101487	0.104778	0.0999279	0.102064		0.0832116	0.0970767	0.0943431	0.0915438
95.1	0.00460705	0.00675613	0.00365382	0.00500567		0.00258555	0.00383895	0.00307487	0.00316646		0.00305597	0.00535352	0.00393218	0.00417665		0.00478294	0.00466973	0.00394721	0.0044753		23.775	0.1012	0.10513	0.0996355	0.101988		0.0826889	0.0975482	0.0943009	0.0915127
95.2	0.00392954	0.00673935	0.00390465	0.00485785		0.00194896	0.00401773	0.00329715	0.00308794		0.00196895	0.00530237	0.0043638	0.00399259		0.00403308	0.00483014	0.00344116	0.00413303		23.8	0.101326	0.105062	0.0993098	0.101899		0.0818175	0.0972367	0.0940531	0.0910357
95.3	0.00426829	0.00650435	0.00355348	0.00477537		0.00216442	0.00382013	0.0027785	0.00292102		0.00295342	0.0043135	0.00446236	0.00396733		0.00381014	0.00474103	0.00404842	0.00422344		23.825	0.101231	0.104667	0.0990939	0.101664		0.0830615	0.0970011	0.0943572	0.0914733
95.4	0.00271003	0.0059924	0.00365382	0.00411875		0.00211545	0.0037825	0.00305635	0.00298476		0.00278934	0.0043476	0.00422106	0.00384583		0.00362774	0.0044915	0.00366382	0.00395221		23.85	0.101566	0.105002	0.0996812	0.102083		0.0827465	0.0972107	0.094046	0.0913344
95.5	0.00304878	0.00571544	0.00371234	0.00415885		0.00200772	0.0032744	0.00324158	0.00284123		0.00299444	0.00363153	0.00450654	0.00375441		0.00350614	0.00417068	0.00358285	0.00377139		23.875	0.101174	0.104619	0.0993263	0.101706		0.0829759	0.0969507	0.094046	0.0913242
95.6	0.00379404	0.0056399	0.00343643	0.00429012		0.00179226	0.00315208	0.0031397	0.00269468		0.00213303	0.00404071	0.00393218	0.00344285		0.00338454	0.00436673	0.00336019	0.00373264		23.9	0.101765	0.104548	0.099151	0.101821		0.0834667	0.0966745	0.0942879	0.0914764
95.7	0.00406504	0.00555598	0.00321068	0.00427723		0.00197834	0.0028698	0.00288964	0.00257926		0.000799885	0.00402366	0.0041123	0.00310963		0.00370881	0.00445585	0.00311728	0.00379077		23.925	0.101796	0.104713	0.0993121	0.10194		0.0831762	0.0970726	0.0940824	0.0914437
95.8	0.00447155	0.00516991	0.00323576	0.00429241		0.00206648	0.00270044	0.00278776	0.00251823		0.00137416	0.00414301	0.00391179	0.00324917		0.00328321	0.0041885	0.00271244	0.00342912		23.95	0.10173	0.104764	0.0990174	0.101837		0.0827459	0.0967753	0.093938	0.0911531
95.9	0.00528455	0.00502723	0.00326084	0.00452421		0.00231132	0.00256871	0.00253769	0.00247258		0.00131263	0.0044499	0.00392538	0.0033442		0.00376961	0.00393897	0.00313752	0.00362932		23.975	0.101272	0.104383	0.0994158	0.10169		0.0834484	0.096921	0.0936773	0.0913489
96	0.00562331	0.0049517	0.00320231	0.00459244		0.00233091	0.00269103	0.00253769	0.00251988		0.001046	0.00559221	0.0033952	0.00348134		0.00350614	0.00383203	0.00329946	0.00355828		24	0.101119	0.103963	0.0989175	0.101333		0.0827522	0.0966418	0.0940237	0.0911392
96.1	0.00711382	0.00506081	0.00311034	0.00509499		0.0025072	0.00253107	0.0026581	0.00256546		0.00170232	0.00473974	0.00348356	0.00340435		0.00350614	0.00431326	0.00321849	0.00370681		24.025	0.101469	0.104241	0.099573	0.101761		0.0820041	0.0966621	0.0937454	0.0908039
96.2	0.0045393	0.00453206	0.00276754	0.0039463		0.00247782	0.00302976	0.00242656	0.00264471		0.0022766	0.0044158	0.00359232	0.00349698		0.00356694	0.00370727	0.00273268	0.00335163		24.05	0.101559	0.104264	0.0994119	0.101745		0.0813375	0.0974726	0.0938898	0.0909
96.3	0.0050813	0.00455724	0.00282606	0.00415487		0.00215462	0.00299212	0.00249139	0.00254604		0.00237915	0.00334169	0.00345977	0.00310121		0.00336427	0.0036538	0.00297559	0.00334517		24.075	0.101462	0.104284	0.0989302	0.101559		0.082189	0.0969473	0.0935293	0.0908885
96.4	0.0053523	0.00428028	0.00323576	0.00428945		0.00170411	0.00293567	0.0022228	0.00228753		0.00379433	0.00313709	0.00347337	0.00344886		0.00318187	0.00343992	0.00267196	0.00311269		24.1	0.10185	0.104171	0.0992131	0.101745		0.0830923	0.096477	0.0935046	0.0910246
96.5	0.00345529	0.00407886	0.00301837	0.00351751		0.00153762	0.00291685	0.00264883	0.00236777		0.00344566	0.0028302	0.00305194	0.00308918		0.00267521	0.00354686	0.00297559	0.00308686		24.125	0.101246	0.104349	0.0993637	0.101653		0.08252	0.0967908	0.0933038	0.0908715
96.6	0.00379404	0.00360887	0.00274245	0.00338179		0.00137112	0.00272867	0.00242656	0.00217545		0.0031175	0.0030689	0.00335102	0.00318301		0.00281707	0.00327951	0.00313752	0.00308686		24.15	0.101537	0.103958	0.0993206	0.101605		0.0825011	0.0968905	0.093305	0.0908989
96.7	0.00433604	0.00364244	0.00278426	0.00358758		0.00157679	0.00229584	0.00262105	0.00216456		0.00287138	0.00267676	0.00336801	0.00297851		0.00295894	0.00361815	0.00281365	0.00315144		24.175	0.100865	0.104312	0.0989432	0.101374		0.0819059	0.0964826	0.0936197	0.0906694
96.8	0.00372629	0.00323119	0.00275081	0.0032361		0.00162576	0.00261576	0.002584	0.00227517		0.00293291	0.00332464	0.0029024	0.00306031		0.00285761	0.00340427	0.00261123	0.00297707		24.2	0.101046	0.103668	0.0988617	0.101192		0.0814477	0.0965387	0.09344	0.0904755
96.9	0.00203252	0.00300459	0.00226587	0.00243433		0.00184122	0.00215471	0.00285259	0.00228284		0.00237915	0.00288135	0.00282763	0.00271506		0.00285761	0.00367162	0.00210518	0.0029125		24.225	0.100345	0.10419	0.0991513	0.101229		0.0822221	0.0965827	0.0934882	0.0907643
97	0.00338753	0.00318923	0.00220734	0.00292803		0.00155721	0.00239935	0.00264883	0.0022018		0.00176385	0.00340989	0.00295678	0.00276679		0.00249281	0.00329733	0.00283389	0.00289312		24.25	0.101546	0.103719	0.0987517	0.101339		0.0819099	0.0963046	0.0932416	0.0904854
97.1	0.00237127	0.00320602	0.00234948	0.00264226		0.00143968	0.00206061	0.00225058	0.00191696		0.00184589	0.00395547	0.00292279	0.00297129		0.00233067	0.00279827	0.00176106	0.00231837		24.275	0.100682	0.104014	0.0985887	0.101095		0.0812462	0.0970226	0.0933085	0.0905258
97.2	0.00372629	0.00349137	0.00241637	0.00321134		0.000989168	0.00185361	0.00188938	0.00157739		0.00182538	0.00373382	0.00300776	0.00291716		0.00239147	0.00308345	0.00234808	0.00262835		24.3	0.100121	0.103858	0.0986575	0.100879		0.0820326	0.0961417	0.0930102	0.0903948
97.3	0.00257453	0.00313048	0.00249998	0.002735		0.000754118	0.00171247	0.00171341	0.00139333		0.00211252	0.00276201	0.002899	0.00262003		0.00210774	0.00286957	0.00234808	0.00246045		24.325	0.100993	0.103606	0.098726	0.101108		0.082169	0.0964111	0.0929397	0.0905066
97.4	0.00115176	0.00330673	0.00235784	0.00227211		0.0006268	0.00182538	0.00149113	0.00131444		0.00172283	0.00330759	0.0021887	0.0024468		0.00137814	0.00285174	0.00190276	0.00207943		24.35	0.100524	0.103637	0.0979608	0.100707		0.0812394	0.0964597	0.093137	0.0902787
97.5	0.000880759	0.00320602	0.00239965	0.00216214		0.00104793	0.00167484	0.00145408	0.00139228		0.00131263	0.00294955	0.00252176	0.00231809		0.00202667	0.00290522	0.00170034	0.00224088		24.375	0.100948	0.103461	0.0980588	0.100823		0.082084	0.0962358	0.093177	0.0904989
97.6	0.00101626	0.00320602	0.00167223	0.00196484		0.000734531	0.00182538	0.00176898	0.00144296		0.000246119	0.00312005	0.00213432	0.00192833		0.00117547	0.00340427	0.00155864	0.00210526		24.4	0.100709	0.103467	0.0978488	0.100675		0.0821656	0.0958557	0.0929315	0.0903176
97.7	0.000880759	0.00250103	0.00180601	0.00172927		0.000989168	0.00169366	0.00180602	0.00149628		0.00112804	0.00211413	0.0019474	0.00176593		0.00111467	0.00322604	0.00204445	0.0021763		24.425	0.101031	0.103586	0.0983242	0.10098		0.0814677	0.0963648	0.0929151	0.0902492
97.8	0.000677507	0.00204782	0.00163042	0.00145192		0.000489687	0.00175952	0.00194495	0.00139805		0.00213303	0.00165379	0.00211393	0.0019572		0.00101334	0.00295869	0.00176106	0.00195673		24.45	0.100688	0.10375	0.0982132	0.100884		0.0811846	0.0958956	0.0931241	0.0900681
97.9	0.00162602	0.00212336	0.00167223	0.0018072		0.000754118	0.00168425	0.00179676	0.00141171		0.00297393	0.00182429	0.00186923	0.00217734		0.00129707	0.00263786	0.00133598	0.00179529		24.475	0.100241	0.103095	0.0977293	0.100355		0.0813832	0.0955235	0.0928716	0.0899261
98	0.00176152	0.00233317	0.00170567	0.00193345		0.000617006	0.00157134	0.0017875	0.00132528		0.0033226	0.00156855	0.00163133	0.00210516		0.000912002	0.00233487	0.00159913	0.00164675		24.5	0.0996921	0.103302	0.0977042	0.100233		0.0813541	0.0953636	0.0924782	0.089732
98.1	0.00230352	0.00224085	0.00167223	0.0020722		0.00070515	0.00172188	0.00200052	0.00147585		0.0041635	0.00206298	0.00189982	0.00262123		0.000952535	0.00279827	0.00131574	0.00173716		24.525	0.100097	0.103032	0.0977768	0.100302		0.0818802	0.0959829	0.0928023	0.0902218
98.2	0.000338753	0.0022996	0.00154681	0.00139505		0.000734531	0.00133611	0.00236172	0.00147745		0.00336362	0.00190954	0.00179786	0.00229643		0.000851202	0.00256657	0.00119428	0.00158218		24.55	0.100518	0.102913	0.0979798	0.10047		0.0814231	0.0953771	0.0926144	0.0898049
98.3	0.00128726	0.00193032	0.00118728	0.00146829		0.000940199	0.00151488	0.00221354	0.00155621		0.00326107	0.0013469	0.00130846	0.00189465		0.000689068	0.00253092	0.00107283	0.00147885		24.575	0.10012	0.102959	0.097616	0.100232		0.0812029	0.0959054	0.092645	0.0899178
98.4	0.000406504	0.00199746	0.00144648	0.00128348		0.00134174	0.00167484	0.00189864	0.00163841		0.00215354	0.0014492	0.000900628	0.00146159		0.000283734	0.00213881	0.00109307	0.00121408		24.6	0.100684	0.102936	0.0979846	0.100535		0.0804393	0.0949162	0.0927859	0.0893805
98.5	0	0.00210657	0.00142975	0.00117877		0.00116546	0.00137374	0.00129663	0.00127861		0.00262526	0.00173904	0.000489398	0.00155662		0.000972802	0.00262004	0.000910894	0.00154989		24.625	0.0999424	0.103203	0.0976532	0.100266		0.0812634	0.0955894	0.092531	0.0897946
98.6	-0.000609756	0.0019555	0.00139631	0.000914018		0.000940199	0.0008186	0.00109288	0.000950558		0.00242017	0.00165379	0.000978796	0.00163962		0.000770135	0.00231704	0.000526294	0.00125283		24.65	0.100754	0.103081	0.0975041	0.100446		0.0812828	0.0949369	0.0927835	0.0896677
98.7	0.000677507	0.0016114	0.00122909	0.00117267		0.000352575	0.00101619	0.00112066	0.00082981		0.00252271	0.00059673	0.000601552	0.00116325		0.0010336	0.00183581	0.00107283	0.00133678		24.675	0.100441	0.103103	0.0976884	0.100411		0.0811903	0.0953218	0.0922668	0.089593
98.8	0.000271003	0.00140158	0.000769224	0.000813936		-0.000254637	0.000828009	0.00112066	0.000564678		0.00182538	0.000630829	0.000965202	0.0010995		0.000851202	0.00158628	0.000404842	0.000975137		24.7	0.0998051	0.102953	0.09765	0.100136		0.0812217	0.0957741	0.0925733	0.0898564
98.9	0.00101626	0.00125891	0.000777585	0.00101759		-4.89687e-05	0.000621007	0.000815026	0.000462355		0.00209201	0.00115936	0.000795272	0.001304		0.000608001	0.00178234	0.000344116	0.000949306		24.725	0.0988565	0.103435	0.0974125	0.0999015		0.0814705	0.0947202	0.0924019	0.0895308
99	0.00142276	0.000956769	0.000434779	0.000938103		6.85562e-05	0.000922101	0.000305635	0.000432097		0.00266628	0.00177314	0.00109435	0.0017948		0.000547201	0.00156846	0.000202421	0.000807233		24.75	0.0993299	0.102746	0.0977226	0.0999327		0.0807389	0.0953041	0.0924676	0.0895036
99.1	-0.000406504	0.000931591	0.000108695	0.000211261		1.95875e-05	0.00070569	0.000379728	0.000368335		0.00143569	0.000937718	0.000822461	0.00104296		0.000790402	0.00105158	-0.000566779	0.00045205		24.775	0.0999143	0.102939	0.0973357	0.100063		0.0814979	0.0948165	0.0921752	0.0894965
99.2	-6.77507e-05	0.000923198	0.00036789	0.000407779		8.81437e-05	0.000865646	5.557e-05	0.000336453		0.00137416	0.000869521	0.000438419	0.000864922		0.000891735	0.0010694	-0.000445326	0.000529545		24.8	0.100703	0.102698	0.0975082	0.100303		0.0807058	0.0949456	0.092221	0.0892908
99.3	-0.00210027	0.0013848	0.000785947	2.34923e-05		8.81437e-05	0.000884464	0.00044456	0.000472389		0.000676826	0	0.00050979	0.00037893		0.000912002	0.000677289	-0.000506052	0.000374556		24.825	0.101088	0.103617	0.0978238	0.100843		0.0802801	0.0950957	0.0920026	0.0891261
99.4	-0.00108401	0.0008057	0.000744141	0.000155277		0.000205669	0.000385777	0.000416775	0.000336073		0.001046	-6.81977e-05	0.000615146	0.000500428		0.0012768	0.000231704	0.000161937	0.00054246		24.85	0.0999457	0.102845	0.0972466	0.100012		0.0813581	0.0944342	0.0921353	0.0893092
99.5	-0.00135501	0.000604275	0.000602002	-4.95777e-05		0.000342781	0.000329322	0.000602008	0.000424704		0.000984474	-0.00057968	0.000778279	0.000359682		0.00149974	3.56468e-05	4.04842e-05	0.000503713		24.875	0.100016	0.1023	0.09705	0.0997889		0.0802213	0.0951706	0.0920613	0.089151
99.6	-0.00115176	0.000562312	0.000861197	9.0583e-05		9.79374e-05	-0.000329322	0.000537176	0.000101931		0.000246119	-5.11483e-05	0.000625342	0.000275476		0.00125654	0.000231704	0.000607263	0.000678076		24.9	0.0997714	0.102649	0.0975539	0.0999915		0.0808873	0.0945554	0.0921024	0.0891817
99.7	-0.00149052	0.000352494	0.000618724	-0.000173101		0.000137112	-0.000291685	0.000490868	0.000112098		-0.000738356	1.70494e-05	0.000163133	-0.000152775		0.000993069	3.56468e-05	0.000182179	0.000387472		24.925	0.100303	0.102797	0.0971388	0.10008		0.0807189	0.0944549	0.0922774	0.0891504
99.8	-0.00196477	0.000419636	0.000593641	-0.000317164		6.85562e-05	-2.82276e-05	0.000129663	5.6664e-05		-0.000123059	-0.000136395	-2.37902e-05	-9.26272e-05		0.000790402	0.000819877	-6.07263e-05	0.000529545		24.95	0.0994234	0.102564	0.0971445	0.0997107		0.0799166	0.0952571	0.092093	0.0890889
99.9	-0.00243902	5.03563e-05	7.52502e-05	-0.000771138		-0.0001567	-0.000244639	0.000129663	-9.05586e-05		6.15296e-05	-8.52471e-05	0.000275286	8.54095e-05		2.02667e-05	0.000160411	2.02421e-05	7.10365e-05		24.975	0.100439	0.102317	0.0970608	0.0999388		0.0810602	0.0946983	0.0918358	0.0891981
100	0	0	0	0		0	0	0	0		0	0	0	0		0	0	0	0		25	0.0994386	0.102723	0.0973167	0.0998261		0.0801414	0.0945441	0.0916502	0.0887786
																					25.025	0.0999357	0.102306	0.0969983	0.0997466		0.0805603	0.0943228	0.0917653	0.0888828
																					25.05	0.099601	0.102499	0.0967649	0.0996216		0.0809038	0.094491	0.0915199	0.0889716
																					25.075	0.0997819	0.102439	0.0968258	0.0996823		0.0808097	0.0944918	0.0916279	0.0889765
																					25.1	0.0997453	0.102476	0.0970868	0.0997694		0.0799417	0.0942239	0.091696	0.0886205
																					25.125	0.0994419	0.102056	0.0969009	0.0994663		0.0805375	0.0945196	0.091588	0.0888817
																					25.15	0.0996323	0.101415	0.0968581	0.0993017		0.0814385	0.0942254	0.0914576	0.0890405
																					25.175	0.0996784	0.102363	0.0967078	0.0995829		0.081277	0.0946754	0.0916303	0.0891942
																					25.2	0.100046	0.102045	0.0959384	0.0993432		0.0802036	0.0940079	0.0913884	0.0885333
																					25.225	0.0996485	0.102093	0.0963586	0.0993667		0.0809569	0.0943891	0.0913167	0.0888876
																					25.25	0.0996361	0.102263	0.0965489	0.0994828		0.0811469	0.0938679	0.0912744	0.0887631
																					25.275	0.099544	0.101838	0.096326	0.0992358		0.0785521	0.0940316	0.0914459	0.0880099
																					25.3	0.0988736	0.102161	0.0962283	0.0990877		0.0809404	0.0940768	0.0912181	0.0887451
																					25.325	0.0995782	0.101429	0.0962749	0.099094		0.0803326	0.0938743	0.0912275	0.0884781
																					25.35	0.0995388	0.101991	0.0963263	0.0992853		0.0805871	0.0942288	0.0912216	0.0886792
																					25.375	0.0992781	0.101906	0.095992	0.0990586		0.0796056	0.0939827	0.0910525	0.0882136
																					25.4	0.0987368	0.101943	0.0962375	0.0989723		0.0805917	0.0939755	0.0909198	0.0884957
																					25.425	0.0990454	0.1015	0.0958611	0.0988021		0.0793631	0.0933487	0.0908834	0.087865
																					25.45	0.0991907	0.10184	0.0956759	0.0989023		0.079944	0.0937347	0.0910983	0.088259
																					25.475	0.0986884	0.101304	0.0964858	0.0988261		0.0798544	0.0935564	0.0908634	0.0880914
																					25.5	0.0986912	0.101815	0.0965086	0.0990049		0.0795862	0.0936207	0.0908775	0.0880281
																					25.525	0.0986974	0.10131	0.096248	0.0987517		0.0795234	0.0937573	0.0908869	0.0880559
																					25.55	0.099233	0.101437	0.0966377	0.0991027		0.0792632	0.0931745	0.090733	0.0877236
																					25.575	0.0992349	0.101321	0.0964772	0.0990111		0.0801528	0.0932475	0.0907847	0.0880617
																					25.6	0.0993759	0.101508	0.0961722	0.0990188		0.0792478	0.0935752	0.0906285	0.0878172
																					25.625	0.0986984	0.101383	0.0959131	0.098665		0.0802305	0.0933822	0.0905216	0.0880448
																					25.65	0.099733	0.101085	0.0959407	0.0989197		0.0792529	0.0928479	0.0908798	0.0876602
																					25.675	0.0985165	0.101514	0.0967788	0.0989365		0.0796569	0.0936813	0.0904312	0.0879231
																					25.7	0.0995203	0.100895	0.0960282	0.0988146		0.0789082	0.0933186	0.0902879	0.0875049
																					25.725	0.0989918	0.10108	0.0957463	0.098606		0.0798498	0.0928362	0.0901047	0.0875969
																					25.75	0.0990459	0.101196	0.0959292	0.0987238		0.0804245	0.0929984	0.0904113	0.0879447
																					25.775	0.0994163	0.100958	0.095933	0.098769		0.0795634	0.0928005	0.0901916	0.0875185
																					25.8	0.0984182	0.101199	0.095817	0.0984781		0.0787319	0.0936678	0.0904183	0.087606
																					25.825	0.0990568	0.101159	0.0957605	0.0986589		0.0790092	0.092788	0.0903114	0.0873696
																					25.85	0.0994343	0.100833	0.0956353	0.0986342		0.0779758	0.0936764	0.0900143	0.0872222
																					25.875	0.0977008	0.10112	0.0955985	0.0981396		0.0791331	0.0928528	0.090147	0.0873776
																					25.9	0.0988061	0.100995	0.0960025	0.0986011		0.0780431	0.0926714	0.0899133	0.0868759
																					25.925	0.0983313	0.10077	0.0955033	0.0982017		0.0789139	0.0929017	0.0900636	0.0872931
																					25.95	0.0987458	0.100864	0.0953657	0.0983252		0.0784026	0.0929145	0.0902445	0.0871872
																					25.975	0.0984491	0.100617	0.0951792	0.0980818		0.0782463	0.0927071	0.0898205	0.0869247
																					26	0.0981495	0.1007	0.0952008	0.0980166		0.0792541	0.0926405	0.0898816	0.0872587
																					26.025	0.098188	0.100521	0.095086	0.0979316		0.0782491	0.0926217	0.0897383	0.0868697
																					26.05	0.0980664	0.100126	0.0956584	0.0979503		0.0788563	0.0927181	0.0898522	0.0871422
																					26.075	0.0978803	0.100492	0.0955842	0.0979856		0.0786948	0.0927402	0.0896314	0.0870222
																					26.1	0.0988218	0.100438	0.0948789	0.0980464		0.0781116	0.09284	0.0898064	0.0869193
																					26.125	0.0987838	0.100279	0.0951989	0.0980874		0.0787211	0.0925995	0.0897841	0.0870349
																					26.15	0.0983214	0.0999048	0.0950597	0.097762		0.0779364	0.0924223	0.0897324	0.0866971
																					26.175	0.0988555	0.101242	0.0949499	0.098349		0.0787564	0.0917902	0.0895305	0.0866923
																					26.2	0.0976951	0.100121	0.094655	0.0974902		0.0786263	0.0920735	0.0893308	0.0866769
																					26.225	0.0986419	0.100396	0.094922	0.0979866		0.0787587	0.092925	0.0894999	0.0870612
																					26.25	0.0980726	0.100498	0.0946839	0.0977515		0.0773589	0.0924276	0.0893778	0.0863881
																					26.275	0.0976277	0.0999332	0.0946446	0.0974018		0.078793	0.0918545	0.08948	0.0867092
																					26.3	0.0981006	0.100169	0.0947391	0.0976695		0.0783496	0.0921559	0.089177	0.0865608
																					26.325	0.0982653	0.100223	0.0946817	0.0977232		0.0775797	0.0920238	0.0894435	0.086349
																					26.35	0.0979558	0.100118	0.0946239	0.0975658		0.0778662	0.0919283	0.0891852	0.0863265
																					26.375	0.0984652	0.0998225	0.0944479	0.0975786		0.0778976	0.0916412	0.0890818	0.0862069
																					26.4	0.0979069	0.0999928	0.0948875	0.0975957		0.0780579	0.0919448	0.0891969	0.0863999
																					26.425	0.0977416	0.0999758	0.0946217	0.0974464		0.0777064	0.0919384	0.0892275	0.0862908
																					26.45	0.0977625	0.0998424	0.0945494	0.0973848		0.0770313	0.0917371	0.0892498	0.0860061
																					26.475	0.0979919	0.100254	0.0944276	0.0975578		0.0779341	0.0915844	0.0889374	0.0861519
																					26.5	0.0984491	0.0993713	0.0946658	0.0974954		0.0780825	0.0915475	0.0887213	0.0861171
																					26.525	0.0977616	0.0994905	0.0940281	0.0970934		0.0773155	0.0920077	0.0887694	0.0860309
																					26.55	0.0979719	0.099394	0.0941165	0.0971608		0.078119	0.0914214	0.0887683	0.0861029
																					26.575	0.0978864	0.0995103	0.0935999	0.0969989		0.0772921	0.0915287	0.089056	0.0859589
																					26.6	0.0981913	0.0994337	0.0935876	0.0970708		0.0780266	0.0915708	0.0887965	0.0861313
																					26.625	0.0983081	0.0992833	0.0941203	0.0972372		0.0770912	0.090968	0.0885029	0.0855207
																					26.65	0.0986314	0.0994451	0.0937125	0.097263		0.0788768	0.0909319	0.0887929	0.0862005
																					26.675	0.0981614	0.0992975	0.0940782	0.097179		0.0771729	0.0915279	0.0886379	0.0857796
																					26.7	0.0976875	0.0989966	0.0940464	0.0969102		0.0768704	0.091181	0.0885498	0.0855337
																					26.725	0.0978665	0.0992946	0.0936075	0.0969229		0.077574	0.0914756	0.0884582	0.0858359
																					26.75	0.0977231	0.098798	0.0938841	0.0968017		0.0774194	0.0916427	0.0885827	0.0858816
																					26.775	0.0973172	0.0989966	0.093723	0.0966789		0.0765194	0.0912416	0.088753	0.0855047
																					26.8	0.0977193	0.0990194	0.0936868	0.0968085		0.0771112	0.0907453	0.0885522	0.0854696
																					26.825	0.0966804	0.0987951	0.0936551	0.0963769		0.076314	0.0911983	0.0883831	0.0852985
																					26.85	0.0966662	0.0986788	0.0938657	0.0964036		0.0766364	0.090822	0.0882198	0.0852261
																					26.875	0.0968381	0.0988746	0.0937024	0.0964717		0.0765417	0.0909105	0.088322	0.0852581
																					26.9	0.0970104	0.0987072	0.0939405	0.0965527		0.0776214	0.0904902	0.0882926	0.0854681
																					26.925	0.0977416	0.0981991	0.0935251	0.0964886		0.0764122	0.0909409	0.0881588	0.0851706
																					26.95	0.096765	0.0986249	0.0935463	0.096312		0.0768909	0.0898242	0.088221	0.0849787
																					26.975	0.0964948	0.0982786	0.0927383	0.0958372		0.0769794	0.0906501	0.088046	0.0852252
																					27	0.0968837	0.0984063	0.0932552	0.0961817		0.0761765	0.0905556	0.0881435	0.0849585
																					27.025	0.0970603	0.0986476	0.093605	0.0964376		0.0765497	0.0905985	0.0880448	0.0850644
																					27.05	0.0965508	0.0984262	0.0938524	0.0962765		0.0765645	0.0902644	0.0878017	0.0848769
																					27.075	0.0965399	0.0978302	0.0930529	0.0958077		0.0760116	0.0905714	0.0880237	0.0848689
																					27.1	0.0968879	0.0984574	0.093677	0.0963408		0.0763682	0.0899382	0.0877524	0.0846863
																					27.125	0.0959849	0.0983297	0.0928788	0.0957311		0.0764407	0.0907219	0.0876855	0.0849494
																					27.15	0.0972763	0.0981991	0.0930405	0.096172		0.0758963	0.0905477	0.087736	0.0847267
																					27.175	0.0967246	0.0983013	0.0931474	0.0960578		0.0765149	0.0905308	0.0878287	0.0849581
																					27.2	0.096179	0.0983978	0.0934166	0.0959978		0.0761126	0.090208	0.0875398	0.0846201
																					27.225	0.0962275	0.0980771	0.0930795	0.0957947		0.07608	0.0896744	0.0875645	0.0844396
																					27.25	0.096133	0.0984943	0.0933098	0.095979		0.0765046	0.0902339	0.0876444	0.0847943
																					27.275	0.0972502	0.0979721	0.0932416	0.0961546		0.0754466	0.0901786	0.0874248	0.08435
																					27.3	0.0959008	0.0982275	0.0932983	0.0958089		0.0762741	0.0898697	0.0875304	0.0845581
																					27.325	0.0961771	0.0978217	0.0928487	0.0956158		0.0761291	0.0901575	0.0873684	0.0845517
																					27.35	0.0968898	0.0979778	0.0932565	0.0960414		0.0761217	0.0900484	0.0874976	0.0845559
																					27.375	0.0972212	0.0978444	0.0927897	0.0959518		0.0761382	0.090229	0.0872498	0.084539
																					27.4	0.0967161	0.0977791	0.0934103	0.0959685		0.0760538	0.0900296	0.0873801	0.0844878
																					27.425	0.096491	0.0973846	0.0929882	0.0956213		0.0762718	0.0898008	0.0870924	0.0843883
																					27.45	0.0958149	0.098009	0.092574	0.095466		0.0760966	0.0904017	0.0872415	0.08458
																					27.475	0.097159	0.0979948	0.0929847	0.0960462		0.075922	0.0906234	0.0871593	0.0845682
																					27.5	0.0967692	0.0974726	0.0930611	0.0957676		0.0760623	0.0896895	0.0871382	0.0842967
																					27.525	0.0964981	0.0974641	0.0927849	0.0955824		0.0763819	0.0898072	0.0871758	0.084455
																					27.55	0.0966662	0.0976599	0.0923076	0.0955446		0.0755938	0.0905364	0.0873343	0.0844882
																					27.575	0.0957427	0.0974896	0.0928382	0.0953568		0.0763163	0.0905188	0.0870771	0.0846374
																					27.6	0.0966453	0.0974215	0.0927817	0.0956162		0.0750802	0.0897072	0.0869256	0.0839043
																					27.625	0.0961401	0.0971774	0.0928766	0.095398		0.0762666	0.0904627	0.0871323	0.0846205
																					27.65	0.0951511	0.0974697	0.0930532	0.0952247		0.0754843	0.0898911	0.0869021	0.0840925
																					27.675	0.0957531	0.0972313	0.0925794	0.095188		0.075272	0.0896597	0.0869245	0.0839521
																					27.7	0.0952052	0.0972143	0.0923898	0.0949364		0.0752446	0.08977	0.0867319	0.0839155
																					27.725	0.0954436	0.0970951	0.0922857	0.0949415		0.0754877	0.0899254	0.0869057	0.0841063
																					27.75	0.0956026	0.0965076	0.0923019	0.0948041		0.074642	0.0901843	0.0868117	0.0838793
																					27.775	0.095568	0.0965928	0.0921741	0.0947783		0.0753296	0.0895378	0.0866144	0.0838273
																					27.8	0.0962455	0.0968567	0.0924411	0.0951811		0.0758038	0.0898148	0.0866485	0.084089
																					27.825	0.0960243	0.0966552	0.0927878	0.0951557		0.0759299	0.0891826	0.0867401	0.0839509
																					27.85	0.0958548	0.0968993	0.0922423	0.0949988		0.074929	0.0894566	0.0865439	0.0836432
																					27.875	0.0960138	0.0966581	0.0921884	0.0949534		0.0759916	0.0895815	0.0863854	0.0839862
																					27.9	0.0954436	0.096939	0.0925084	0.0949637		0.0756503	0.0897354	0.0862304	0.083872
																					27.925	0.0960936	0.0969731	0.0926863	0.095251		0.0756041	0.0892432	0.0864253	0.0837576
																					27.95	0.0964829	0.096343	0.0920041	0.0949434		0.0748651	0.0897263	0.0865428	0.0837114
																					27.975	0.096048	0.0964338	0.0920197	0.0948338		0.0749655	0.0888481	0.0864747	0.0834294
																					28	0.0954868	0.0964934	0.0920454	0.0946752		0.0749262	0.0888094	0.0861928	0.0833095
																					28.025	0.0956316	0.0965701	0.0923416	0.0948477		0.075171	0.0886028	0.0859838	0.0832525
																					28.05	0.0958215	0.0966126	0.0920504	0.0948282		0.0752024	0.0889324	0.0861775	0.0834375
																					28.075	0.0951786	0.0963061	0.0923438	0.0946095		0.0754557	0.0886845	0.086322	0.0834874
																					28.1	0.0947399	0.0963402	0.0923698	0.0944833		0.0748936	0.0886299	0.0860166	0.08318
																					28.125	0.0953472	0.0961217	0.0922689	0.0945793		0.0755818	0.0888214	0.0862492	0.0835508
																					28.15	0.0949047	0.0964395	0.0920209	0.094455		0.0750477	0.0887059	0.0860636	0.0832724
																					28.175	0.0956316	0.0963799	0.0922819	0.0947645		0.0741227	0.0887417	0.0857759	0.0828801
																					28.2	0.0949973	0.0960422	0.0925642	0.0945345		0.0747413	0.0880162	0.0860378	0.0829318
																					28.225	0.0960119	0.096133	0.092091	0.0947453		0.0746163	0.0884534	0.0859051	0.0829916
																					28.25	0.0949332	0.0962267	0.0916892	0.094283		0.0747281	0.0886118	0.0858933	0.0830778
																					28.275	0.0950286	0.096133	0.0916883	0.0942833		0.0748257	0.088476	0.0860472	0.0831163
																					28.3	0.094371	0.0960933	0.0913791	0.0939478		0.0745587	0.0886777	0.0856033	0.0829465
																					28.325	0.0954426	0.0957669	0.0913677	0.0941924		0.0750294	0.0881611	0.0856608	0.0829504
																					28.35	0.0948031	0.0960024	0.0915491	0.0941182		0.0747658	0.0886284	0.0856643	0.0830195
																					28.375	0.094955	0.0954263	0.0914812	0.0939542		0.0741683	0.0881923	0.0856761	0.0826789
																					28.4	0.0950661	0.0961727	0.0913166	0.0941851		0.0752132	0.0883646	0.085595	0.0830576
																					28.425	0.0944474	0.0956051	0.091101	0.0937178		0.0750066	0.0886559	0.085521	0.0830612
																					28.45	0.0949032	0.0955824	0.091765	0.0940836		0.0746842	0.088467	0.0855187	0.08289
																					28.475	0.095086	0.0955512	0.0910302	0.0938892		0.072833	0.0881377	0.0854083	0.0821263
																					28.5	0.0945172	0.0958832	0.090807	0.0937358		0.0739669	0.0881799	0.0853296	0.0824921
																					28.525	0.0945533	0.0956562	0.0910924	0.0937673		0.0743452	0.087842	0.0854177	0.082535
																					28.55	0.0948206	0.0955285	0.0910642	0.0938044		0.0737534	0.0877852	0.0855528	0.0823638
																					28.575	0.0945324	0.0953525	0.0909798	0.0936216		0.0740839	0.0877743	0.0855246	0.0824609
																					28.6	0.0948994	0.0952645	0.0912716	0.0938119		0.0737831	0.0877302	0.0852204	0.0822446
																					28.625	0.0948515	0.095361	0.0908568	0.0936898		0.0738556	0.0879011	0.0852732	0.0823433
																					28.65	0.094597	0.0958009	0.0910832	0.093827		0.073661	0.0879628	0.0850959	0.0822399
																					28.675	0.0950974	0.0954377	0.0906617	0.0937323		0.0740068	0.08755	0.0853261	0.0822943
																					28.7	0.0950105	0.0948019	0.0915795	0.0937973		0.0732284	0.0876776	0.0851241	0.08201
																					28.725	0.0940747	0.0954519	0.0913518	0.0936261		0.0735155	0.0876693	0.0852791	0.0821546
																					28.75	0.0940842	0.0950347	0.090662	0.0932603		0.0738037	0.0874815	0.0848951	0.0820601
																					28.775	0.0937803	0.094765	0.0911381	0.0932278		0.073665	0.0879515	0.0850301	0.0822155
																					28.8	0.0938848	0.0948388	0.0907334	0.0931523		0.073875	0.0873009	0.0850806	0.0820855
																					28.825	0.0943226	0.0946544	0.0905523	0.0931764		0.0732165	0.0872268	0.0847882	0.0817438
																					28.85	0.0941587	0.0949438	0.0911403	0.0934143		0.0733654	0.0872979	0.0849151	0.0818595
																					28.875	0.0946321	0.0948303	0.0908209	0.0934278		0.0728678	0.0876806	0.0849491	0.0818325
																					28.9	0.0945243	0.0947054	0.0909196	0.0933831		0.0737078	0.0870458	0.0852662	0.0820066
																					28.925	0.0942623	0.0943478	0.0908108	0.0931403		0.0731183	0.087351	0.0845639	0.0816777
																					28.95	0.0937072	0.0945465	0.090226	0.0928266		0.0730978	0.0872046	0.0845968	0.0816331
																					28.975	0.0940799	0.094467	0.0903319	0.0929596		0.0727086	0.0870872	0.0847929	0.0815296
																					29	0.0943933	0.0946402	0.0907026	0.0932454		0.073245	0.0873942	0.0847213	0.0817868
																					29.025	0.0933924	0.0943961	0.0905098	0.0927661		0.0731737	0.0873329	0.0844441	0.0816502
																					29.05	0.0941046	0.0943422	0.0903138	0.0929202		0.0732684	0.0870357	0.0846062	0.0816367
																					29.075	0.0940856	0.0946799	0.0905209	0.0930955		0.0732547	0.0869672	0.0845463	0.0815894
																					29.1	0.093778	0.0944869	0.0898315	0.0926988		0.0724449	0.0871278	0.0845545	0.0813758
																					29.125	0.0941388	0.094538	0.0901283	0.092935		0.0738921	0.0873769	0.0844336	0.0819009
																					29.15	0.0947399	0.094169	0.0905371	0.0931487		0.0740993	0.0865157	0.0843032	0.0816394
																					29.175	0.0933188	0.094047	0.0902288	0.0925316		0.0739589	0.0874887	0.0842222	0.0818899
																					29.2	0.0925306	0.0946061	0.0904093	0.0925153		0.0727468	0.0871372	0.0842034	0.0813625
																					29.225	0.094352	0.0942457	0.090193	0.0929302		0.0738122	0.0867881	0.0840977	0.081566
																					29.25	0.0933948	0.0943819	0.089965	0.0925806		0.0724569	0.0871248	0.0839215	0.0811677
																					29.275	0.0941364	0.0941577	0.0899479	0.0927473		0.0735126	0.0864269	0.0842327	0.0813907
																					29.3	0.0932481	0.0942939	0.0899235	0.0924885		0.0724649	0.0866112	0.0840202	0.0810321
																					29.325	0.0934304	0.0936383	0.089359	0.0921426		0.0727234	0.0867956	0.0838146	0.0811112
																					29.35	0.0933207	0.0937632	0.0901708	0.0924182		0.0730726	0.0865597	0.0840742	0.0812355
																					29.375	0.094362	0.094328	0.0900142	0.0929014		0.072627	0.0867373	0.0837735	0.0810459
																					29.4	0.093175	0.0937008	0.0896019	0.0921592		0.073253	0.0861909	0.0840413	0.0811617
																					29.425	0.0934978	0.0936752	0.0896831	0.0922854		0.0726646	0.0859354	0.0836044	0.0807348
																					29.45	0.0934617	0.0939704	0.0892638	0.092232		0.0728878	0.0864532	0.0839908	0.0811106
																					29.475	0.0924428	0.0940584	0.0894427	0.0919813		0.0733357	0.086171	0.0839473	0.0811513
																					29.5	0.0930449	0.0938625	0.0892797	0.0920624		0.073415	0.0861988	0.0837759	0.0811299
																					29.525	0.0933891	0.093556	0.0897912	0.0922454		0.0722515	0.0866932	0.0836972	0.0808807
																					29.55	0.0933202	0.0939675	0.0895882	0.092292		0.0727411	0.0861431	0.0837183	0.0808675
																					29.575	0.0938368	0.0934368	0.0892175	0.0921637		0.0727046	0.086352	0.0833813	0.0808126
																					29.6	0.0942836	0.093468	0.0892692	0.0923403		0.0718423	0.0862827	0.0837125	0.0806125
																					29.625	0.0930681	0.0933999	0.0897915	0.0920865		0.0724329	0.0865484	0.0834799	0.0808204
																					29.65	0.0932058	0.0933318	0.089449	0.0919955		0.0715142	0.0861281	0.0834259	0.0803561
																					29.675	0.0936222	0.09296	0.0895718	0.0920513		0.0718891	0.0861947	0.0835492	0.0805443
																					29.7	0.0930244	0.0931246	0.0892641	0.0918044		0.0722241	0.0858542	0.0834811	0.0805198
																					29.725	0.0926137	0.0929997	0.0891522	0.0915886		0.0722389	0.085911	0.083467	0.080539
																					29.75	0.0939109	0.0930338	0.0887402	0.091895		0.0718628	0.0859719	0.0833449	0.0803932
																					29.775	0.0936787	0.093082	0.0894116	0.0920575		0.0729813	0.0856984	0.0833484	0.080676
																					29.8	0.0931384	0.0935617	0.088609	0.0917697		0.0719022	0.0859926	0.0835504	0.0804817
																					29.825	0.0935942	0.0926421	0.0888065	0.091681		0.0726452	0.0858169	0.0832815	0.0805812
																					29.85	0.0925387	0.093451	0.0887957	0.0915952		0.0717573	0.0852439	0.0832087	0.0800699
																					29.875	0.0936132	0.0928323	0.0890853	0.0918436		0.0717253	0.0856649	0.0832345	0.0802082
																					29.9	0.0924912	0.0928011	0.0886568	0.0913164		0.0711678	0.085818	0.0833026	0.0800962
																					29.925	0.0927904	0.0927188	0.0886353	0.0913815		0.0713264	0.0854102	0.0830067	0.0799144
																					29.95	0.0925515	0.0927131	0.0883181	0.0911943		0.0717767	0.0853338	0.0830137	0.0800414
																					29.975	0.0921636	0.0927131	0.0882668	0.0910478		0.0711935	0.0851901	0.0828833	0.0797556
																					30	0.0922116	0.0925655	0.0888363	0.0912045		0.0710171	0.0854139	0.0828469	0.0797593
																					30.025	0.0925715	0.0925996	0.0887767	0.0913159		0.0726104	0.0854407	0.082989	0.0803467
																					30.05	0.0918284	0.0928891	0.0889752	0.0912309		0.0716266	0.0855577	0.0828352	0.0800065
																					30.075	0.0926299	0.0926138	0.0883787	0.0912075		0.0708882	0.08559	0.0827037	0.0797273
																					30.1	0.0922154	0.0925797	0.088621	0.0911387		0.0714742	0.0856976	0.0826038	0.0799252
																					30.125	0.0925558	0.0923952	0.0887793	0.0912434		0.0706593	0.0852849	0.0826367	0.079527
																					30.15	0.0920668	0.0924974	0.0886359	0.0910667		0.0719542	0.0851799	0.0825557	0.0798966
																					30.175	0.0929869	0.0921256	0.088556	0.0912228		0.0710594	0.0847442	0.0826966	0.0795001
																					30.2	0.0920701	0.0919809	0.0883207	0.0907905		0.0709652	0.0846106	0.0825416	0.0793725
																					30.225	0.0917581	0.0916999	0.0887257	0.0907279		0.0713532	0.0850866	0.0825416	0.0796605
																					30.25	0.0913745	0.0922647	0.0886242	0.0907544		0.0709595	0.0847367	0.0826931	0.0794631
																					30.275	0.0917947	0.091575	0.0884482	0.090606		0.0709498	0.0850779	0.0822973	0.0794417
																					30.3	0.0909177	0.0916034	0.0880832	0.0902014		0.0702422	0.0848962	0.0822691	0.0791358
																					30.325	0.0916461	0.0920376	0.0883048	0.0906628		0.0709692	0.0844842	0.082282	0.0792451
																					30.35	0.0914148	0.0922335	0.0885328	0.090727		0.070717	0.0850418	0.0824406	0.0793998
																					30.375	0.0918303	0.0919638	0.0880889	0.0906277		0.0713881	0.0848943	0.0821951	0.0794925
																					30.4	0.0920297	0.0918475	0.0879455	0.0906076		0.070907	0.0845045	0.0821717	0.0791944
																					30.425	0.0919234	0.0917538	0.0882154	0.0906309		0.0709726	0.0850358	0.0819779	0.0793288
																					30.45	0.0918716	0.0919269	0.0875691	0.0904559		0.0719901	0.0848187	0.0819121	0.0795736
																					30.475	0.0921109	0.09189	0.0882627	0.0907545		0.0698016	0.0844981	0.0821082	0.0788026
																					30.5	0.0920193	0.0919582	0.0881133	0.0906969		0.0720945	0.0847073	0.0819133	0.0795717
																					30.525	0.0917159	0.0918815	0.0883993	0.0906656		0.0709538	0.084249	0.0820119	0.0790716
																					30.55	0.0917349	0.0918872	0.0882385	0.0906202		0.070992	0.0846855	0.0818346	0.0791707
																					30.575	0.0912971	0.091294	0.0876347	0.0900753		0.0706057	0.0847577	0.0819614	0.0791083
																					30.6	0.0910616	0.0913905	0.0879211	0.0901244		0.0713207	0.0841181	0.0819039	0.0791142
																					30.625	0.0911418	0.0914501	0.0883381	0.09031		0.0712089	0.0843427	0.0818734	0.0791417
																					30.65	0.0917842	0.0913338	0.0881279	0.0904153		0.0711957	0.084366	0.0819943	0.0791854
																					30.675	0.0912406	0.0909336	0.0875789	0.0899177		0.0704567	0.084106	0.0815774	0.0787134
																					30.7	0.0918507	0.0912458	0.087825	0.0903072		0.0707957	0.084342	0.0818393	0.0789923
																					30.725	0.091488	0.091101	0.0875453	0.0900448		0.0706336	0.0842573	0.0815175	0.0788028
																					30.75	0.0910673	0.0915041	0.0875015	0.0900243		0.0703848	0.0845512	0.0819415	0.0789591
																					30.775	0.0924756	0.0910528	0.0878463	0.0904582		0.0703249	0.0847754	0.0815093	0.0788699
																					30.8	0.0916641	0.0913735	0.0874229	0.0901535		0.0700031	0.0836368	0.08175	0.0784633
																					30.825	0.0921223	0.0911748	0.0874302	0.0902424		0.0703061	0.0843984	0.081649	0.0787845
																					30.85	0.0920786	0.0910471	0.087218	0.0901146		0.070277	0.0846584	0.0814564	0.0787973
																					30.875	0.0916708	0.0911635	0.0873855	0.0900732		0.0699078	0.08462	0.081588	0.0787053
																					30.9	0.0903171	0.0909081	0.0870547	0.0894266		0.0703597	0.0837832	0.0813437	0.0784955
																					30.925	0.0913189	0.0909506	0.0874914	0.0899203		0.0700207	0.0842358	0.081292	0.0785162
																					30.95	0.090855	0.0904994	0.0869789	0.0894444		0.0703278	0.0831992	0.0812274	0.0782515
																					30.975	0.0913916	0.0910273	0.0875225	0.0899804		0.0697953	0.0838904	0.0812368	0.0783075
																					31	0.0907919	0.0910528	0.0874001	0.0897483		0.0699819	0.0835367	0.081494	0.0783376
																					31.025	0.0906675	0.0908995	0.0871023	0.0895564		0.0705007	0.0832007	0.0811687	0.07829
																					31.05	0.0905308	0.0906384	0.0873947	0.0895213		0.0704687	0.0837237	0.0813484	0.0785136
																					31.075	0.0906908	0.0906157	0.0872998	0.0895354		0.069752	0.083469	0.081056	0.0780923
																					31.1	0.0898413	0.0913395	0.0870642	0.089415		0.0711798	0.0837659	0.0811664	0.078704
																					31.125	0.0914201	0.0903717	0.087245	0.0896789		0.0699471	0.0839059	0.0810243	0.0782924
																					31.15	0.0902967	0.0904029	0.0870791	0.0892596		0.0703523	0.0836658	0.0808199	0.0782793
																					31.175	0.0912691	0.0909648	0.0870376	0.0897572		0.0701286	0.0835525	0.0809832	0.0782214
																					31.2	0.0905725	0.0905987	0.0866053	0.0892589		0.0707974	0.0838961	0.0808493	0.0785143
																					31.225	0.0911228	0.0907236	0.0871159	0.0896541		0.070677	0.0834859	0.0810043	0.0783891
																					31.25	0.0902962	0.0903773	0.0862714	0.0889816		0.0700847	0.0834829	0.0809291	0.0781656
																					31.275	0.0900787	0.0906101	0.0870252	0.089238		0.071036	0.0834701	0.0808728	0.0784596
																					31.3	0.0901775	0.090752	0.0865238	0.0891511		0.0700989	0.083349	0.0807941	0.0780807
																					31.325	0.0908873	0.090962	0.0866332	0.0894942		0.0700784	0.0834224	0.0809926	0.0781644
																					31.35	0.09078	0.0906299	0.0864541	0.089288		0.0700647	0.0828196	0.080686	0.0778568
																					31.375	0.0898921	0.0908229	0.0862156	0.0889769		0.0693422	0.0831766	0.0805122	0.077677
																					31.4	0.0906917	0.0905703	0.0863409	0.089201		0.0700647	0.0834122	0.0805944	0.0780238
																					31.425	0.0908308	0.0908854	0.0863405	0.0893522		0.0702787	0.0830088	0.0805193	0.0779356
																					31.45	0.0901106	0.0906838	0.0863703	0.0890549		0.0693177	0.0826804	0.0806226	0.0775402
																					31.475	0.0900669	0.0906328	0.0863805	0.0890267		0.0706365	0.0830792	0.0803995	0.0780384
																					31.5	0.090582	0.090752	0.0860852	0.0891397		0.0695659	0.082806	0.0803572	0.0775764
																					31.525	0.0902905	0.0898494	0.086058	0.0887326		0.0699437	0.0826258	0.0804101	0.0776598
																					31.55	0.0893608	0.090085	0.0856102	0.088352		0.0689451	0.0830841	0.0805768	0.0775353
																					31.575	0.0896994	0.0901247	0.0861189	0.0886477		0.0702895	0.0829091	0.080255	0.0778179
																					31.6	0.0902041	0.0902837	0.0859184	0.0888021		0.0697303	0.0827379	0.0803325	0.0776003
																					31.625	0.0903423	0.0900992	0.086188	0.0888765		0.0694855	0.082771	0.0802844	0.0775136
																					31.65	0.0894895	0.0896338	0.0859387	0.088354		0.0701121	0.0826085	0.0803126	0.0776777
																					31.675	0.0904472	0.0904341	0.086136	0.0890058		0.0697092	0.0829065	0.0798851	0.0775003
																					31.7	0.090639	0.0899828	0.0862679	0.0889633		0.0690814	0.0824346	0.0801364	0.0772175
																					31.725	0.0895821	0.0896082	0.0860104	0.0884002		0.0701971	0.082563	0.0800636	0.0776079
																					31.75	0.0894036	0.0898012	0.0864357	0.0885468		0.0694358	0.0827432	0.0800307	0.0774032
																					31.775	0.0896115	0.0903433	0.0861344	0.0886964		0.0692623	0.0825656	0.079952	0.07726
																					31.8	0.0900963	0.0895827	0.0864325	0.0887038		0.0697525	0.0827692	0.0798463	0.077456
																					31.825	0.0889686	0.0894947	0.086103	0.0881888		0.0688469	0.0828719	0.0797618	0.0771602
																					31.85	0.0890717	0.0898466	0.0862127	0.088377		0.0687408	0.0827594	0.0798522	0.0771175
																					31.875	0.089272	0.0894833	0.0858363	0.0881972		0.068787	0.082952	0.0798276	0.0771889
																					31.9	0.0898618	0.0896678	0.0860323	0.0885206		0.0682317	0.0823236	0.0796925	0.0767493
																					31.925	0.0891785	0.0892733	0.0859869	0.0881463		0.0683835	0.0824275	0.0798593	0.0768901
																					31.95	0.0892891	0.0895656	0.0860161	0.0882903		0.0690421	0.0825641	0.0797113	0.0771058
																					31.975	0.0894862	0.089384	0.0859159	0.088262		0.0679241	0.0830085	0.0796925	0.076875
																					32	0.0895612	0.089455	0.0861709	0.0883957		0.0685764	0.0829076	0.0796373	0.0770404
																					32.025	0.0902278	0.0894067	0.0861147	0.0885831		0.0686985	0.0829678	0.0798052	0.0771572
																					32.05	0.0894919	0.0895259	0.0857361	0.0882513		0.0683384	0.0825731	0.0796291	0.0768469
																					32.075	0.0892412	0.0891825	0.0859073	0.0881103		0.0683384	0.0826461	0.0798334	0.0769393
																					32.1	0.0887877	0.0888703	0.0860263	0.0878948		0.0687659	0.0822518	0.07946	0.0768259
																					32.125	0.0895617	0.0890974	0.085711	0.0881234		0.0681809	0.0826051	0.0793296	0.0767052
																					32.15	0.0881952	0.0889952	0.0855404	0.0875769		0.0688914	0.082064	0.07946	0.0768051
																					32.175	0.0894406	0.0891513	0.0851151	0.0879023		0.069102	0.0821713	0.0791018	0.0767917
																					32.2	0.0892678	0.0890207	0.0858788	0.0880558		0.0690135	0.0824245	0.0793507	0.0769296
																					32.225	0.0899657	0.0889611	0.0857722	0.088233		0.0695967	0.082058	0.0792932	0.0769826
																					32.25	0.0892929	0.0892563	0.0854716	0.0880069		0.0686049	0.0820042	0.0789808	0.07653
																					32.275	0.0893642	0.0892903	0.0856403	0.0880983		0.0684994	0.0822349	0.0792051	0.0766465
																					32.3	0.0892535	0.0894322	0.0851025	0.0879294		0.0689125	0.0820557	0.0790513	0.0766732
																					32.325	0.089434	0.0888788	0.0853549	0.0878892		0.0688349	0.082394	0.0792039	0.076811
																					32.35	0.0893005	0.0892052	0.0850175	0.0878411		0.0677975	0.0821013	0.0792274	0.0763754
																					32.375	0.0886971	0.0889952	0.085111	0.0876011		0.0691733	0.0817228	0.0790982	0.0766648
																					32.4	0.0889677	0.0889498	0.0854643	0.0877939		0.0688184	0.0816915	0.0788763	0.0764621
																					32.425	0.0890764	0.0888476	0.0854237	0.0877826		0.0693816	0.0819891	0.0789738	0.0767815
																					32.45	0.0889701	0.0890009	0.0855074	0.0878261		0.0683481	0.0819519	0.0788035	0.0763678
																					32.475	0.0885541	0.0884105	0.0850698	0.0873448		0.0682129	0.0823236	0.0789174	0.0764846
																					32.5	0.0892046	0.0883651	0.084721	0.0874302		0.0683196	0.081938	0.078679	0.0763122
																					32.525	0.0882351	0.0890292	0.0848922	0.0873855		0.0685787	0.0817081	0.0788328	0.0763732
																					32.55	0.088679	0.0883651	0.0846131	0.0872191		0.0685581	0.0814944	0.0787365	0.076263
																					32.575	0.0891011	0.0888817	0.0849544	0.0876457		0.0690232	0.0819824	0.0786602	0.0765553
																					32.6	0.0893765	0.0886716	0.0850619	0.0877033		0.0696578	0.0817363	0.0786273	0.0766738
																					32.625	0.0890707	0.0883821	0.0848865	0.0874465		0.0677056	0.0815421	0.0786485	0.0759654
																					32.65	0.088999	0.0886943	0.0845881	0.0874272		0.0686146	0.0816031	0.0785345	0.0762507
																					32.675	0.0889786	0.088595	0.0847365	0.0874367		0.0680417	0.08157	0.0783478	0.0759865
																					32.7	0.0886614	0.0888391	0.0846033	0.0873679		0.0674693	0.0813852	0.078612	0.0758222
																					32.725	0.0883922	0.0887256	0.0844393	0.0871857		0.0674294	0.0823993	0.078295	0.0760412
																					32.75	0.0886054	0.0883509	0.0845304	0.0871622		0.0675464	0.0815199	0.0784335	0.0758333
																					32.775	0.0886135	0.0885099	0.0843046	0.0871426		0.0675538	0.0812532	0.0782292	0.0756787
																					32.8	0.0881695	0.088192	0.0844374	0.086933		0.0675321	0.0816998	0.0784265	0.0758861
																					32.825	0.0875974	0.0882431	0.0844955	0.0867787		0.0680582	0.0813815	0.0782374	0.0758924
																					32.85	0.0879692	0.088473	0.0844073	0.0869498		0.0674471	0.0818744	0.0782315	0.075851
																					32.875	0.0885294	0.0877379	0.0843905	0.086886		0.0669774	0.0807087	0.0781658	0.075284
																					32.9	0.0887915	0.0881437	0.0844184	0.0871179		0.0677113	0.0814883	0.078181	0.0757936
																					32.925	0.0889582	0.087894	0.0841194	0.0869905		0.0686808	0.0814315	0.0780319	0.0760481
																					32.95	0.0876363	0.0876669	0.0840937	0.0864657		0.0670242	0.0810669	0.0781223	0.0754045
																					32.975	0.0877375	0.0881778	0.0839624	0.0866259		0.0677113	0.0809375	0.0780436	0.0755641
																					33	0.0877332	0.0877776	0.0838006	0.0864372		0.067269	0.0811422	0.0780566	0.0754892
																					33.025	0.0889872	0.0876868	0.0843715	0.0870152		0.0681587	0.0808607	0.0781082	0.0757092
																					33.05	0.0884131	0.0881097	0.0844352	0.086986		0.0677849	0.0808581	0.0779145	0.0755191
																					33.075	0.0878809	0.0876726	0.084283	0.0866122		0.066752	0.0805635	0.0774001	0.0749052
																					33.1	0.08802	0.0876556	0.0841768	0.0866174		0.0673483	0.0808321	0.0778017	0.0753274
																					33.125	0.0876572	0.0883509	0.0837797	0.086596		0.066966	0.080802	0.077763	0.075177
																					33.15	0.088453	0.0875165	0.0841244	0.086698		0.0671018	0.0810105	0.0777571	0.0752898
																					33.175	0.0881695	0.0876414	0.0844438	0.0867516		0.0677073	0.0807407	0.0775844	0.0753441
																					33.2	0.0878961	0.0878145	0.08401	0.0865735		0.0678083	0.0799885	0.0775751	0.075124
																					33.225	0.0876287	0.0873406	0.0836966	0.086222		0.0668102	0.0802941	0.0777289	0.0749444
																					33.25	0.088113	0.0872696	0.0841723	0.0865183		0.0670265	0.0803148	0.0775457	0.0749623
																					33.275	0.0875965	0.0872611	0.0840785	0.086312		0.0667657	0.0805898	0.0777759	0.0750438
																					33.3	0.0878196	0.0871078	0.0839678	0.0862984		0.0670059	0.0803148	0.0774705	0.0749304
																					33.325	0.0869199	0.0868042	0.083982	0.085902		0.0665557	0.0802527	0.0772697	0.0746927
																					33.35	0.0877209	0.0867162	0.0836548	0.0860306		0.0666065	0.080086	0.0776326	0.074775
																					33.375	0.0873723	0.0867843	0.083591	0.0859159		0.0669683	0.0800258	0.0773507	0.0747816
																					33.4	0.0878961	0.0872356	0.0835397	0.0862238		0.0672137	0.0798809	0.0773343	0.0748096
																					33.425	0.0876031	0.0871816	0.0841267	0.0863038		0.0665448	0.0804054	0.0773413	0.0747639
																					33.45	0.0874844	0.0864494	0.0833722	0.0857687		0.0672285	0.0797884	0.0770172	0.074678
																					33.475	0.0872209	0.0869007	0.0834515	0.0858577		0.0661699	0.0799803	0.0772826	0.0744776
																					33.5	0.0872275	0.0868836	0.0834318	0.0858477		0.0672308	0.0799095	0.0770454	0.0747286
																					33.525	0.0870808	0.0871078	0.0830957	0.0857614		0.0663697	0.079712	0.0773261	0.0744693
																					33.55	0.0868235	0.0864693	0.0833173	0.0855367		0.0667292	0.0796277	0.0770642	0.0744737
																					33.575	0.0870319	0.0869376	0.0834229	0.0857975		0.0663126	0.079911	0.0769303	0.0743846
																					33.6	0.087652	0.0867957	0.0830795	0.0858424		0.0676354	0.0796612	0.0771605	0.074819
																					33.625	0.0871212	0.0864721	0.0831997	0.0855977		0.0669238	0.0797409	0.0769338	0.0745329
																					33.65	0.0866544	0.0868155	0.0833614	0.0856105		0.0664119	0.0794557	0.0767929	0.0742202
																					33.675	0.0868562	0.0865658	0.0828036	0.0854085		0.0666048	0.0798696	0.0769796	0.0744847
																					33.7	0.087218	0.0868978	0.0829507	0.0856889		0.0668878	0.0796175	0.0768845	0.0744633
																					33.725	0.0869536	0.0863756	0.0830995	0.0854762		0.066623	0.0805616	0.0770524	0.0747457
																					33.75	0.0860581	0.0860634	0.08294	0.0850205		0.0660712	0.0795434	0.0765639	0.0740595
																					33.775	0.0876392	0.0866083	0.0827595	0.085669		0.0668918	0.0796563	0.0770865	0.0745449
																					33.8	0.0865353	0.0864636	0.0830557	0.0853515		0.0661739	0.0796638	0.0769855	0.0742744
																					33.825	0.0861231	0.0862451	0.0829574	0.0851085		0.0662276	0.0797157	0.0770419	0.0743284
																					33.85	0.0873182	0.0865714	0.0825689	0.0854862		0.0667138	0.0793214	0.0763678	0.0741343
																					33.875	0.0868553	0.086228	0.0825502	0.0852112		0.0671714	0.0798139	0.0765756	0.0745203
																					33.9	0.086634	0.0863018	0.0823663	0.0851007		0.0669249	0.0788466	0.076726	0.0741658
																					33.925	0.0862233	0.0856349	0.0828369	0.0848984		0.0665015	0.0792315	0.0765839	0.0741056
																					33.95	0.0869968	0.0862678	0.0824005	0.0852217		0.0682294	0.0796567	0.0766543	0.0748468
																					33.975	0.0869389	0.0865147	0.0823951	0.0852829		0.0669329	0.0798647	0.076531	0.0744429
																					34	0.0863287	0.0859556	0.082867	0.0850504		0.0671144	0.0791739	0.0765157	0.074268
																					34.025	0.087021	0.0861486	0.0827104	0.0852933		0.0663542	0.0797639	0.0763196	0.0741459
																					34.05	0.0853981	0.0858477	0.0824443	0.0845634		0.0669101	0.0790294	0.0764206	0.07412
																					34.075	0.0866117	0.0859868	0.0820916	0.0848967		0.0668416	0.0793963	0.0764053	0.0742144
																					34.1	0.0863007	0.0860152	0.0821763	0.0848307		0.065912	0.0798764	0.0763971	0.0740618
																					34.125	0.0860956	0.086194	0.0820717	0.0847871		0.0666339	0.0790701	0.0763314	0.0740118
																					34.15	0.0865657	0.0857143	0.0818788	0.0847196		0.0665534	0.0791732	0.0764418	0.0740561
																					34.175	0.0869246	0.0861173	0.0822749	0.0851056		0.0663925	0.0790268	0.0761857	0.0738683
																					34.2	0.0863159	0.0858931	0.082384	0.0848644		0.0657636	0.0793496	0.0762174	0.0737769
																					34.225	0.0863482	0.0861514	0.082307	0.0849355		0.066425	0.0786498	0.0762961	0.0737903
																					34.25	0.0852723	0.0858789	0.082332	0.0844944		0.0655302	0.0790855	0.0763995	0.0736717
																					34.275	0.085522	0.085913	0.082443	0.084626		0.0667086	0.0794249	0.0762961	0.0741432
																					34.3	0.0862755	0.085703	0.0826761	0.0848849		0.0665671	0.0792213	0.0760084	0.0739323
																					34.325	0.0864094	0.08551	0.082366	0.0847618		0.0665745	0.0789854	0.0762292	0.0739297
																					34.35	0.0859166	0.0858193	0.0825277	0.0847545		0.0655285	0.0789952	0.0762033	0.0735757
																					34.375	0.0863458	0.0853681	0.0819213	0.0845451		0.0658418	0.0788635	0.0761129	0.0736061
																					34.4	0.086371	0.0861372	0.0823999	0.0849694		0.0656695	0.0792258	0.076181	0.0736921
																					34.425	0.0851417	0.0854703	0.0819299	0.0841806		0.0659805	0.0792936	0.0759556	0.0737432
																					34.45	0.0857647	0.0850871	0.0820729	0.0843082		0.0662458	0.0789045	0.075716	0.0736221
																					34.475	0.0857761	0.085808	0.0823371	0.0846404		0.0652283	0.079195	0.075891	0.0734381
																					34.5	0.0854537	0.0850048	0.0819423	0.0841336		0.0658372	0.0789764	0.0758604	0.073558
																					34.525	0.0852794	0.0855327	0.0821763	0.0843295		0.0655399	0.0786754	0.0757254	0.0733135
																					34.55	0.0866331	0.0854107	0.0823393	0.0847944		0.0660467	0.0787521	0.0757101	0.073503
																					34.575	0.0849864	0.085527	0.0825512	0.0843549		0.064228	0.0786167	0.0754224	0.0727557
																					34.6	0.085806	0.0856718	0.0820355	0.0845044		0.0646674	0.0786501	0.075514	0.0729438
																					34.625	0.0849304	0.0853454	0.0818481	0.0840413		0.0657288	0.079113	0.0753813	0.0734077
																					34.65	0.0856972	0.0849878	0.0819604	0.0842151		0.0650149	0.078357	0.0753977	0.0729232
																					34.675	0.0859005	0.0853198	0.0820409	0.0844204		0.0663086	0.0784436	0.0755586	0.0734369
																					34.7	0.0859964	0.0853454	0.0821348	0.0844922		0.0650006	0.0781467	0.0755844	0.0729106
																					34.725	0.0859304	0.0845394	0.0813661	0.0839453		0.0651479	0.0784665	0.0755304	0.0730483
																					34.75	0.0857191	0.0852744	0.0816334	0.084209		0.0652671	0.0785429	0.0755198	0.07311
																					34.775	0.0845031	0.0851666	0.0814698	0.0837131		0.0657933	0.0784067	0.0750501	0.0730834
																					34.8	0.0851626	0.0847579	0.0816911	0.0838705		0.0647872	0.078176	0.075359	0.0727741
																					34.825	0.0846645	0.0853794	0.0818195	0.0839545		0.0657933	0.0781734	0.0752568	0.0730745
																					34.85	0.0857571	0.0851524	0.0812167	0.084042		0.0652997	0.0781565	0.075211	0.0728891
																					34.875	0.0856312	0.0849793	0.0814311	0.0840139		0.0663086	0.0783457	0.0753366	0.0733303
																					34.9	0.0851118	0.0845507	0.0813959	0.0836861		0.0656637	0.0782016	0.0751887	0.073018
																					34.925	0.0855011	0.0847891	0.0811234	0.0838046		0.0651034	0.0779443	0.0749385	0.0726621
																					34.95	0.0853525	0.0847721	0.0813876	0.0838374		0.0645818	0.0781742	0.0752521	0.0726694
																					34.975	0.0851583	0.0845592	0.0813274	0.0836816		0.0654789	0.0779556	0.0750313	0.0728219
																					35	0.0856654	0.0846387	0.0809141	0.0837394		0.0649647	0.0781512	0.0749303	0.0726821
																					35.025	0.0843046	0.0847579	0.0810971	0.0833865		0.0653345	0.0779262	0.0750066	0.0727558
																					35.05	0.0849475	0.0845081	0.0806341	0.0833633		0.0648471	0.0784014	0.0751746	0.0728077
																					35.075	0.0849755	0.0842187	0.0808396	0.0833446		0.0648089	0.0780188	0.075056	0.0726279
																					35.1	0.0848393	0.084318	0.080923	0.0833601		0.0646269	0.0776918	0.0749291	0.0724159
																					35.125	0.0847932	0.0848118	0.0808177	0.0834743		0.0649909	0.0783969	0.0748998	0.0727625
																					35.15	0.0852861	0.0844854	0.0807391	0.0835035		0.0646657	0.0775861	0.0748739	0.0723752
																					35.175	0.0848359	0.0844826	0.0802421	0.0831869		0.0642485	0.0781253	0.074827	0.0724002
																					35.2	0.0846702	0.084196	0.0805948	0.0831537		0.0650463	0.0783164	0.0746884	0.0726837
																					35.225	0.0845031	0.0840938	0.0810074	0.0832014		0.0647889	0.0784703	0.0746344	0.0726312
																					35.25	0.0844081	0.0845479	0.0807597	0.0832386		0.0648859	0.0778581	0.0746543	0.0724661
																					35.275	0.0838289	0.0841364	0.0803316	0.0827656		0.0643969	0.0779638	0.074726	0.0723622
																					35.3	0.0845074	0.084247	0.0806937	0.0831494		0.0648934	0.0776756	0.0743689	0.0723126
																					35.325	0.0846636	0.0842357	0.0806157	0.0831717		0.064232	0.0784868	0.0745627	0.0724272
																					35.35	0.0833479	0.0835375	0.0804648	0.0824501		0.0640185	0.0784488	0.0745991	0.0723555
																					35.375	0.0840501	0.0840739	0.0804616	0.0828619		0.064176	0.0785448	0.0745533	0.0724247
																					35.4	0.0847851	0.0838242	0.0805631	0.0830575		0.0639546	0.0780105	0.0742621	0.0720757
																					35.425	0.0846175	0.0837844	0.0808098	0.0830706		0.0646691	0.0771195	0.074484	0.0720909
																					35.45	0.0836361	0.0836227	0.0805596	0.0826061		0.063768	0.0775898	0.0743948	0.0719175
																					35.475	0.0838802	0.0837419	0.0804194	0.0826805		0.0639832	0.0779755	0.0742327	0.0720638
																					35.5	0.0846826	0.0837475	0.0804917	0.0829739		0.0639038	0.0778837	0.0741376	0.071975
																					35.525	0.0836622	0.0831288	0.0802923	0.0823611		0.0642673	0.0782472	0.0742691	0.0722612
																					35.55	0.0830469	0.0833303	0.0805583	0.0823118		0.0645949	0.0775567	0.0744277	0.0721931
																					35.575	0.0837591	0.0834666	0.0808082	0.082678		0.0645647	0.0778077	0.0743079	0.0722267
																					35.6	0.08378	0.0835006	0.0804017	0.0825607		0.0639364	0.0773547	0.0742809	0.0718573
																					35.625	0.0839984	0.083617	0.080396	0.0826704		0.0638599	0.0769464	0.0742468	0.0716844
																					35.65	0.0839898	0.0832196	0.0801207	0.0824434		0.0638542	0.0769946	0.0739168	0.0715885
																					35.675	0.0836969	0.0835318	0.0796218	0.0822835		0.0637754	0.0778084	0.0738968	0.0718269
																					35.7	0.0833992	0.0835262	0.0801879	0.0823711		0.0637218	0.0772869	0.0738569	0.0716219
																					35.725	0.0833977	0.0833076	0.079717	0.0821408		0.0637001	0.0769536	0.0740237	0.0715591
																					35.75	0.0839148	0.083634	0.0802894	0.0826127		0.0646297	0.0769148	0.0740495	0.0718647
																					35.775	0.083629	0.0831544	0.0801619	0.0823151		0.0635757	0.0773772	0.0739415	0.0716315
																					35.8	0.083892	0.0838355	0.0798388	0.0825221		0.0639683	0.0765619	0.0739238	0.0714847
																					35.825	0.0835744	0.0836368	0.0799352	0.0823821		0.0638884	0.0769212	0.0739837	0.0715978
																					35.85	0.0831148	0.0834467	0.0799396	0.082167		0.0642097	0.0763813	0.0740753	0.0715554
																					35.875	0.0833968	0.0833502	0.0800316	0.0822595		0.0632687	0.0768625	0.0739896	0.0713736
																					35.9	0.0837928	0.083424	0.0797075	0.0823081		0.0643763	0.0766838	0.0736831	0.0715811
																					35.925	0.083931	0.083441	0.0792074	0.0821931		0.0637229	0.0766815	0.0737089	0.0713711
																					35.95	0.0837577	0.0832622	0.0798476	0.0822892		0.0637925	0.07661	0.0738322	0.0714116
																					35.975	0.0834932	0.0830267	0.0794655	0.0819951		0.0633149	0.0762744	0.0736948	0.0710947
																					36	0.0826684	0.08295	0.0801327	0.0819171		0.0640813	0.0766525	0.0734599	0.0713979
																					36.025	0.0828907	0.0833587	0.0799415	0.0820636		0.0645521	0.0765378	0.0735891	0.0715597
																					36.05	0.0826172	0.0829841	0.0795413	0.0817142		0.0629708	0.0763402	0.0737982	0.0710364
																					36.075	0.0834367	0.08274	0.0793783	0.0818517		0.0641355	0.0770213	0.0733707	0.0715092
																					36.1	0.0828242	0.0828479	0.0792749	0.081649		0.0634867	0.0765641	0.0736279	0.0712262
																					36.125	0.0824424	0.0831742	0.079247	0.0816212		0.0639301	0.0761687	0.0734928	0.0711972
																					36.15	0.081894	0.0829614	0.0792067	0.081354		0.0632048	0.0767526	0.0733918	0.0711164
																					36.175	0.0823802	0.082845	0.0795467	0.0815906		0.0630022	0.0762499	0.0732533	0.0708351
																					36.2	0.083374	0.0833133	0.0791265	0.0819379		0.063247	0.0765434	0.0733695	0.0710533
																					36.225	0.0818413	0.0826889	0.0792825	0.0812709		0.0619858	0.0757615	0.073359	0.0703688
																					36.25	0.0833821	0.0828365	0.0788645	0.0816944		0.0631249	0.0759963	0.073285	0.0708021
																					36.275	0.082866	0.0827343	0.079319	0.0816398		0.0629976	0.0757318	0.0733096	0.0706797
																					36.3	0.0825887	0.0828507	0.0790967	0.081512		0.0622443	0.0763737	0.0731358	0.0705846
																					36.325	0.0823964	0.0828393	0.0795594	0.0815984		0.0626176	0.0756517	0.0733355	0.0705349
																					36.35	0.0819254	0.0826435	0.0790815	0.0812168		0.0626324	0.0759756	0.0731863	0.0705981
																					36.375	0.0832301	0.082635	0.0791465	0.0816705		0.063174	0.0759316	0.0732873	0.0707976
																					36.4	0.0824348	0.0826293	0.0791677	0.0814106		0.0627888	0.0759666	0.0733519	0.0707024
																					36.425	0.0824168	0.0825186	0.0785189	0.0811514		0.0619624	0.0760483	0.0728951	0.0703019
																					36.45	0.0827905	0.0828393	0.0785195	0.0813831		0.0622689	0.0756445	0.0730078	0.0703071
																					36.475	0.0825398	0.0824193	0.0786245	0.0811945		0.0624212	0.0755181	0.073144	0.0703611
																					36.5	0.0821481	0.0823994	0.0783508	0.0809661		0.062589	0.0758725	0.0729045	0.0704553
																					36.525	0.0824809	0.0822632	0.0780758	0.08094		0.0614745	0.0758643	0.0730125	0.0701171
																					36.55	0.0827591	0.082127	0.0781317	0.0810059		0.0631117	0.0755369	0.0730853	0.070578
																					36.575	0.0823332	0.0822263	0.0779836	0.0808477		0.0623197	0.0760238	0.0728798	0.0704078
																					36.6	0.0821272	0.0816814	0.0777476	0.0805187		0.0621205	0.0754921	0.072787	0.0701332
																					36.625	0.0824234	0.0820447	0.0781396	0.0808692		0.0622814	0.0758579	0.0727318	0.0702904
																					36.65	0.0827644	0.0818119	0.0787973	0.0811245		0.0628424	0.0754997	0.0726684	0.0703368
																					36.675	0.0822905	0.0815508	0.0780781	0.0806398		0.0632128	0.0757506	0.0727741	0.0705792
																					36.7	0.0816761	0.0818687	0.0781447	0.0805632		0.0629565	0.0758883	0.0727577	0.0705342
																					36.725	0.0819396	0.0817495	0.0785306	0.0807399		0.062746	0.0761641	0.0728528	0.0705876
																					36.75	0.0824671	0.0816956	0.0782693	0.0808107		0.0625776	0.0762488	0.0726332	0.0704865
																					36.775	0.0811476	0.0818233	0.0779385	0.0803032		0.0626855	0.0757721	0.0724136	0.0702904
																					36.8	0.0827254	0.0816076	0.0783483	0.0808938		0.0626381	0.0757585	0.0723255	0.0702407
																					36.825	0.0821153	0.0816984	0.0779515	0.0805884		0.0626387	0.0757551	0.0724688	0.0702875
																					36.85	0.0813684	0.0810258	0.0777444	0.0800462		0.0625068	0.0755693	0.0725451	0.0702071
																					36.875	0.0822017	0.0815083	0.0779978	0.0805693		0.0628321	0.0757307	0.0725686	0.0703771
																					36.9	0.0814563	0.0815366	0.0785344	0.0805091		0.0621433	0.0751332	0.0720836	0.0697867
																					36.925	0.0817815	0.0815168	0.0777787	0.080359		0.0622158	0.07559	0.0719966	0.0699341
																					36.95	0.0825668	0.0812812	0.0779813	0.0806098		0.0625531	0.0755418	0.0720154	0.0700368
																					36.975	0.0823418	0.0812358	0.0780045	0.0805274		0.0624777	0.0754353	0.0720988	0.0700039
																					37	0.0813043	0.0809321	0.0782024	0.0801463		0.0622261	0.0750669	0.0721012	0.0697981
																					37.025	0.0809041	0.0816076	0.077942	0.0801512		0.0619465	0.0754026	0.0718358	0.0697283
																					37.05	0.0817782	0.0812784	0.07851	0.0805222		0.0625519	0.0750918	0.0718463	0.06983
																					37.075	0.0808343	0.081179	0.0779442	0.0799859		0.0621274	0.0749511	0.0719332	0.0696706
																					37.1	0.0815778	0.0815594	0.0773579	0.080165		0.0627003	0.0756276	0.071797	0.0700416
																					37.125	0.0816842	0.0813068	0.0773839	0.0801249		0.0631477	0.0746963	0.071797	0.0698803
																					37.15	0.081781	0.0806795	0.0774685	0.0799764		0.0622215	0.0748348	0.0716631	0.0695731
																					37.175	0.0810503	0.0812642	0.0778374	0.0800506		0.0624989	0.0745135	0.0716302	0.0695475
																					37.2	0.0818518	0.0807902	0.0769351	0.079859		0.0615019	0.0744156	0.0717911	0.0692362
																					37.225	0.0810646	0.0812642	0.0775117	0.0799468		0.0630216	0.0752363	0.071602	0.0699533
																					37.25	0.0810503	0.0807079	0.0774761	0.0797448		0.0621439	0.0745477	0.0716983	0.0694633
																					37.275	0.0813703	0.0806795	0.0771597	0.0797365		0.0621804	0.0745797	0.0716784	0.0694795
																					37.3	0.0813129	0.0804298	0.0768444	0.079529		0.0606705	0.0744028	0.0717559	0.0689431
																					37.325	0.0809136	0.0810173	0.0772475	0.0797261		0.0615966	0.0747208	0.071501	0.0692728
																					37.35	0.0812597	0.0809889	0.0766757	0.0796414		0.0617068	0.0745729	0.0716702	0.0693166
																					37.375	0.0815598	0.0802482	0.077557	0.0797883		0.0610054	0.0748668	0.0715128	0.0691283
																					37.4	0.0806097	0.0802368	0.0775618	0.0794694		0.0623037	0.0748841	0.0715234	0.0695704
																					37.425	0.082027	0.0805916	0.0776163	0.0800783		0.0610813	0.0743456	0.071501	0.068976
																					37.45	0.0802555	0.080654	0.0773103	0.0794066		0.0615031	0.0746143	0.0712168	0.0691114
																					37.475	0.0805171	0.0803844	0.0771834	0.0793616		0.0617815	0.0749541	0.0714482	0.0693946
																					37.5	0.0806377	0.0806398	0.0775088	0.0795954		0.0613564	0.0741925	0.071487	0.069012
																					37.525	0.080707	0.0806483	0.0772123	0.0795225		0.0626039	0.0737481	0.0713472	0.0692331
																					37.55	0.0810446	0.0807817	0.0775932	0.0798065		0.0609096	0.0739735	0.0710184	0.0686338
																					37.575	0.0807075	0.0806909	0.0774124	0.0796036		0.0613513	0.0738926	0.0711546	0.0687995
																					37.6	0.0804596	0.0802623	0.0770401	0.079254		0.0612308	0.0747467	0.070989	0.0689889
																					37.625	0.0813266	0.0803219	0.0772285	0.0796257		0.0618375	0.0739637	0.0711511	0.0689841
																					37.65	0.0808751	0.0803219	0.0766938	0.0792969		0.060283	0.0739442	0.0711311	0.0684528
																					37.675	0.0802963	0.0803021	0.0770506	0.0792163		0.0618654	0.0737417	0.0708962	0.0688345
																					37.7	0.0790884	0.0802254	0.0772989	0.0788709		0.0608285	0.0744006	0.0707811	0.0686701
																					37.725	0.07967	0.0801148	0.0771406	0.0789751		0.0613752	0.0739415	0.0710536	0.0687901
																					37.75	0.0804634	0.0806001	0.0762587	0.0791074		0.0620606	0.0739893	0.07078	0.0689433
																					37.775	0.0800827	0.0800296	0.0764106	0.078841		0.0608622	0.0738753	0.0708422	0.0685266
																					37.8	0.0795309	0.0799246	0.0767588	0.0787381		0.0616805	0.0739257	0.0708528	0.0688197
																					37.825	0.0803685	0.0799587	0.0763085	0.0788785		0.0615533	0.0741575	0.0708046	0.0688385
																					37.85	0.0805109	0.0796067	0.0768945	0.0790041		0.0611241	0.0745131	0.0708269	0.0688214
																					37.875	0.0800067	0.0797912	0.076637	0.0788116		0.061507	0.0743125	0.070558	0.0687925
																					37.9	0.0804354	0.0796522	0.0766234	0.0789037		0.0605843	0.0745056	0.0707741	0.0686213
																					37.925	0.0801107	0.0797146	0.0765327	0.078786		0.0608223	0.0738226	0.0708598	0.0685016
																					37.95	0.0802916	0.0801375	0.0767737	0.0790676		0.0624058	0.0738076	0.0706449	0.0689528
																					37.975	0.0807445	0.0800552	0.0765914	0.0791304		0.0607675	0.0739216	0.0705768	0.068422
																					38	0.080773	0.0801091	0.0758613	0.0789145		0.0609478	0.0742068	0.0707365	0.0686304
																					38.025	0.0807365	0.0798991	0.077082	0.0792392		0.0614825	0.0736661	0.0704934	0.0685473
																					38.05	0.0801843	0.0798111	0.0766247	0.0788733		0.0605712	0.0743806	0.070504	0.0684853
																					38.075	0.0803542	0.0796635	0.0765222	0.0788467		0.0603463	0.0740209	0.0705122	0.0682931
																					38.1	0.0805499	0.0795301	0.0766288	0.0789029		0.0606528	0.0739284	0.0706484	0.0684099
																					38.125	0.0800855	0.0796947	0.0768505	0.0788769		0.0603423	0.0739295	0.0704464	0.0682394
																					38.15	0.080387	0.0795727	0.0765397	0.0788331		0.0608982	0.0738813	0.0703584	0.0683793
																					38.175	0.0795727	0.079638	0.0770753	0.078762		0.0613159	0.0738196	0.0702303	0.0684553
																					38.2	0.0797536	0.0793996	0.0770106	0.0787213		0.0613216	0.0735886	0.0703278	0.0684127
																					38.225	0.0801871	0.079584	0.0764762	0.0787491		0.0604525	0.0734983	0.0702127	0.0680545
																					38.25	0.0799374	0.0794393	0.0768023	0.0787263		0.061091	0.073747	0.0703302	0.0683894
																					38.275	0.0784446	0.0793201	0.0763567	0.0780405		0.0605575	0.0731739	0.0700201	0.0679172
																					38.3	0.0798809	0.0794961	0.0767674	0.0787148		0.0609079	0.0735916	0.0701775	0.0682257
																					38.325	0.0799288	0.0791895	0.0766281	0.0785822		0.0598156	0.0732432	0.0701599	0.0677396
																					38.35	0.0803799	0.0790363	0.0762917	0.0785693		0.0605483	0.0730915	0.0701975	0.0679458
																					38.375	0.0799568	0.0791895	0.0765248	0.078557		0.0612919	0.0730253	0.0699086	0.0680753
																					38.4	0.0798761	0.0794478	0.0766234	0.0786491		0.0602362	0.0737252	0.0700319	0.0679977
																					38.425	0.0797166	0.0790391	0.0762162	0.078324		0.0614848	0.0727141	0.0701986	0.0681325
																					38.45	0.0793263	0.0793939	0.0763932	0.0783711		0.0601409	0.0729535	0.0700037	0.0676993
																					38.475	0.0796003	0.0788546	0.0764696	0.0783082		0.0605934	0.0730648	0.0697747	0.067811
																					38.5	0.0796881	0.0790278	0.0759041	0.0782067		0.0607093	0.0732782	0.0697899	0.0679258
																					38.525	0.0790922	0.0787667	0.0760681	0.0779757		0.0604622	0.0730976	0.0697218	0.0677605
																					38.55	0.0796012	0.0792747	0.0757605	0.0782121		0.0602972	0.0730806	0.0699097	0.0677625
																					38.575	0.0791297	0.0790334	0.075854	0.0780057		0.0606191	0.0729828	0.0697829	0.0677949
																					38.6	0.0802612	0.0792747	0.0760107	0.0785155		0.0612326	0.073315	0.0697113	0.0680863
																					38.625	0.0788724	0.0791612	0.0755892	0.0778743		0.0603412	0.0726265	0.0696936	0.0675538
																					38.65	0.0787252	0.0789341	0.0754817	0.0777137		0.0600222	0.0730276	0.0696901	0.06758
																					38.675	0.0790837	0.0790448	0.0757323	0.0779536		0.0605164	0.0731581	0.0695868	0.0677538
																					38.7	0.0796131	0.079147	0.0758455	0.0782018		0.0607977	0.0725317	0.0694083	0.0675792
																					38.725	0.0795005	0.0787865	0.0755128	0.0779333		0.0602265	0.0723702	0.0695645	0.0673871
																					38.75	0.0791848	0.0788121	0.0752543	0.0777504		0.0599805	0.0723691	0.0692133	0.0671876
																					38.775	0.0788648	0.0783551	0.0754849	0.0775683		0.0595868	0.0727296	0.0692685	0.067195
																					38.8	0.0785946	0.0787127	0.0754713	0.0775929		0.0608468	0.0727156	0.0691194	0.0675606
																					38.825	0.0793861	0.0786191	0.0755651	0.0778568		0.0604975	0.0724643	0.06909	0.0673506
																					38.85	0.0785975	0.0784204	0.0750885	0.0773688		0.0592541	0.0723048	0.0692779	0.0669456
																					38.875	0.0793524	0.0786446	0.0747656	0.0775876		0.059661	0.0730422	0.069245	0.0673161
																					38.9	0.0788016	0.078585	0.0750771	0.0774879		0.0604228	0.072497	0.0692204	0.0673801
																					38.925	0.0789559	0.0787496	0.0750305	0.0775787		0.0600102	0.0722555	0.0690783	0.0671146
																					38.95	0.0782024	0.0787667	0.0753571	0.0774421		0.0602733	0.0726844	0.069218	0.0673919
																					38.975	0.0780149	0.078358	0.0751018	0.0771582		0.0605198	0.0722679	0.0690771	0.0672883
																					39	0.078578	0.0783268	0.0752569	0.0773872		0.0602864	0.0718295	0.0691417	0.0670859
																					39.025	0.0786335	0.0781877	0.0748773	0.0772328		0.060594	0.0727111	0.0690818	0.0674623
																					39.05	0.0776341	0.0783778	0.0752134	0.0770751		0.0588603	0.0718484	0.0690466	0.0665851
																					39.075	0.0787651	0.0785056	0.0747898	0.0773535		0.0599257	0.0718269	0.0691111	0.0669546
																					39.1	0.0786407	0.0779266	0.0749007	0.077156		0.0602482	0.0721272	0.0690595	0.0671449
																					39.125	0.0784788	0.0787014	0.0754744	0.0775515		0.0603629	0.0720079	0.0689796	0.0671168
																					39.15	0.0782105	0.0777762	0.0744691	0.0768186		0.0599166	0.0720034	0.069009	0.0669763
																					39.175	0.0792992	0.0780174	0.0744618	0.0772595		0.0602225	0.0721072	0.0691687	0.0671661
																					39.2	0.0786264	0.0783864	0.074426	0.0771463		0.0596358	0.0714965	0.068881	0.0666711
																					39.225	0.0783833	0.0781792	0.0748265	0.0771297		0.0596045	0.0721415	0.0687377	0.0668279
																					39.25	0.0787071	0.0780855	0.0748259	0.0772062		0.0599497	0.0726735	0.0686684	0.0670972
																					39.275	0.078889	0.0777591	0.0749562	0.0772015		0.0597962	0.0721588	0.0685968	0.0668506
																					39.3	0.0787328	0.0774356	0.0748694	0.0770126		0.0594481	0.0719334	0.0687588	0.0667134
																					39.325	0.0784199	0.0778783	0.074224	0.0768407		0.0592398	0.0719793	0.0686907	0.0666366
																					39.35	0.0786829	0.0782359	0.074184	0.0770343		0.0590937	0.0718886	0.0683924	0.0664582
																					39.375	0.0776488	0.0775179	0.0745316	0.0765661		0.0600393	0.0719413	0.0682996	0.0667601
																					39.4	0.0786407	0.0775945	0.0746436	0.0769596		0.0603789	0.0716993	0.0685932	0.0668905
																					39.425	0.0788002	0.0777677	0.0745592	0.0770424		0.0597083	0.0719774	0.0683783	0.066688
																					39.45	0.0778174	0.0772029	0.0747079	0.0765761		0.0592364	0.071252	0.0685275	0.0663386
																					39.475	0.0785053	0.0776882	0.0749401	0.0770445		0.0590224	0.0719684	0.0683184	0.0664364
																					39.5	0.0777324	0.0775661	0.0745525	0.076617		0.059108	0.0715944	0.0681023	0.0662682
																					39.525	0.0775125	0.0775633	0.0746591	0.0765783		0.059447	0.0718088	0.0684241	0.06656
																					39.55	0.0774959	0.0773959	0.0750507	0.0766475		0.0599018	0.0713761	0.0682374	0.0665051
																					39.575	0.0780595	0.0772767	0.0745529	0.0766297		0.0597346	0.0712098	0.0681587	0.0663677
																					39.6	0.0779759	0.0772085	0.0746629	0.0766158		0.0590018	0.071308	0.0679532	0.0660877
																					39.625	0.0780329	0.0775179	0.0744739	0.0766749		0.0587582	0.0712189	0.0678886	0.0659552
																					39.65	0.0779612	0.0772909	0.0741381	0.0764634		0.058858	0.0713189	0.0681658	0.0661142
																					39.675	0.0781464	0.0771773	0.0742579	0.0765272		0.0590812	0.0710781	0.0678956	0.0660183
																					39.7	0.0788144	0.0772994	0.0741285	0.0767475		0.0594755	0.0717468	0.0677629	0.0663284
																					39.725	0.0776569	0.0771262	0.0741672	0.0763168		0.0593397	0.0710409	0.0679144	0.0660983
																					39.75	0.0777048	0.0767999	0.0744412	0.0763153		0.0591947	0.0714679	0.0680401	0.0662342
																					39.775	0.077193	0.0769162	0.0741628	0.0760907		0.0590076	0.0708798	0.0679156	0.0659343
																					39.8	0.078022	0.0774186	0.073943	0.0764612		0.0581944	0.0704607	0.067979	0.0655447
																					39.825	0.0785438	0.0768538	0.0742316	0.0765431		0.0592295	0.0711225	0.067743	0.0660317
																					39.85	0.0784194	0.0768282	0.0737302	0.076326		0.0588894	0.0710345	0.0678827	0.0659355
																					39.875	0.0779156	0.0767232	0.0742529	0.0762972		0.0593751	0.0707711	0.0679673	0.0660378
																					39.9	0.0776588	0.0768566	0.0744663	0.0763272		0.0583678	0.0713641	0.0676197	0.0657838
																					39.925	0.076873	0.0766097	0.0737949	0.0757592		0.0582754	0.0712365	0.0677547	0.0657556
																					39.95	0.0775529	0.0769219	0.0742519	0.0762422		0.0582075	0.0714089	0.0675774	0.0657312
																					39.975	0.07723	0.0771433	0.0739852	0.0761195		0.058212	0.0707816	0.0676361	0.0655432
																					40	0.0773573	0.0766381	0.0737727	0.0759227		0.0586047	0.0706808	0.0676396	0.0656417
																					40.025	0.0775975	0.0767374	0.0739386	0.0760912		0.0582337	0.0708185	0.0674646	0.0655056
																					40.05	0.0778534	0.0765898	0.0736354	0.0760262		0.0582446	0.0708283	0.0675692	0.0655473
																					40.075	0.0776507	0.0767119	0.0737175	0.0760267		0.0589174	0.0709374	0.0673472	0.065734
																					40.1	0.0774546	0.0766154	0.0736335	0.0759012		0.0581698	0.0710382	0.0672744	0.0654941
																					40.125	0.0770596	0.076377	0.0736953	0.0757106		0.0588112	0.0706962	0.0673084	0.0656053
																					40.15	0.0765021	0.0763713	0.0737537	0.0755424		0.0583644	0.0704291	0.0672908	0.0653614
																					40.175	0.0769048	0.0765132	0.0731851	0.0755344		0.0570839	0.0705491	0.06744	0.0650243
																					40.2	0.0771479	0.0761812	0.0735396	0.0756229		0.0585253	0.0706883	0.0672462	0.0654866
																					40.225	0.0768739	0.0763514	0.0738612	0.0756955		0.0580426	0.0702917	0.0670501	0.0651281
																					40.25	0.0762282	0.0761187	0.0734813	0.0752761		0.0582805	0.070741	0.0671205	0.0653807
																					40.275	0.0775121	0.0764423	0.0737581	0.0759041		0.05824	0.0707015	0.0671017	0.0653477
																					40.3	0.076636	0.0765728	0.0732571	0.0754886		0.0574896	0.0698011	0.0670489	0.0647799
																					40.325	0.0765354	0.0763316	0.0735171	0.0754614		0.0587616	0.0698018	0.0669397	0.0651677
																					40.35	0.0774665	0.0759144	0.0732891	0.0755566		0.058232	0.070265	0.0669655	0.0651542
																					40.375	0.0759884	0.0762436	0.073153	0.0751283		0.0584021	0.0706774	0.0671041	0.0653945
																					40.4	0.0767903	0.0763741	0.0739284	0.0756976		0.0582058	0.0701977	0.0670078	0.0651371
																					40.425	0.0762154	0.0759711	0.0732247	0.0751371		0.0577002	0.0699836	0.0669913	0.0648917
																					40.45	0.0764043	0.0760818	0.0729	0.0751287		0.0580306	0.0698432	0.0669737	0.0649492
																					40.475	0.0767448	0.0758065	0.0735323	0.0753612		0.058163	0.0707274	0.0670559	0.0653155
																					40.5	0.0771593	0.076167	0.0728978	0.075408		0.0579992	0.0705141	0.0667717	0.065095
																					40.525	0.0767035	0.0759087	0.0730059	0.075206		0.0590212	0.0702507	0.066767	0.0653463
																					40.55	0.0770505	0.075991	0.0729536	0.0753317		0.057917	0.0701698	0.0667823	0.0649564
																					40.575	0.0764888	0.0755568	0.0733807	0.0751421		0.0577875	0.0702996	0.0665474	0.0648782
																					40.6	0.0759504	0.0757384	0.0733988	0.0750292		0.0570045	0.0702056	0.0667741	0.0646614
																					40.625	0.0762728	0.0756589	0.0736221	0.0751846		0.0579393	0.0704321	0.0668457	0.0650724
																					40.65	0.0763227	0.075798	0.0732894	0.0751367		0.0571015	0.0703045	0.0667847	0.0647302
																					40.675	0.0767576	0.0755057	0.0735231	0.0752621		0.0582606	0.0696841	0.0665075	0.0648174
																					40.7	0.0766973	0.0753553	0.0731321	0.0750616		0.0584066	0.0695979	0.0662926	0.0647657
																					40.725	0.076127	0.0758888	0.0732425	0.0750861		0.0578639	0.069812	0.0665239	0.0647333
																					40.75	0.0757895	0.075483	0.0729028	0.0747251		0.0586161	0.0698282	0.0667224	0.0650556
																					40.775	0.0755673	0.0756504	0.0728438	0.0746872		0.0572408	0.0701062	0.0663983	0.0645818
																					40.8	0.0755715	0.075185	0.0720796	0.0742787		0.0576671	0.0700897	0.0666296	0.0647955
																					40.825	0.0760083	0.0753212	0.0728737	0.0747344		0.0570724	0.0694075	0.0664723	0.0643174
																					40.85	0.075769	0.075202	0.0728984	0.0746231		0.0577601	0.0702214	0.066383	0.0647882
																					40.875	0.0753303	0.0749324	0.0727344	0.0743324		0.0574525	0.0698361	0.0663078	0.0645321
																					40.9	0.0754908	0.0752928	0.0730912	0.0746249		0.0569292	0.0701529	0.0661505	0.0644109
																					40.925	0.0757591	0.0754801	0.0722086	0.0744826		0.0576334	0.0693571	0.0664006	0.0644637
																					40.95	0.0755573	0.0746628	0.0718814	0.0740338		0.0577475	0.0698233	0.0661845	0.0645851
																					40.975	0.0762462	0.0753609	0.072442	0.0746831		0.0573909	0.0700671	0.0660436	0.0645005
																					41	0.0762272	0.0753212	0.0723371	0.0746285		0.0571112	0.0697507	0.0659872	0.064283
																					41.025	0.0756081	0.0750204	0.072202	0.0742768		0.0570605	0.069938	0.0661751	0.0643912
																					41.05	0.0750867	0.0746798	0.0723165	0.0740277		0.0577452	0.0701589	0.0661399	0.0646813
																					41.075	0.076551	0.0752872	0.0723815	0.0747399		0.0569121	0.069298	0.0660871	0.0640991
																					41.1	0.0754628	0.0748927	0.0716489	0.0740015		0.056944	0.0700351	0.0660683	0.0643491
																					41.125	0.0754239	0.0749664	0.0721395	0.0741766		0.0572197	0.0694037	0.0662339	0.0642858
																					41.15	0.0757918	0.0752276	0.0717643	0.0742612		0.0578771	0.0693797	0.0659121	0.0643896
																					41.175	0.0755824	0.0749409	0.0722302	0.0742512		0.0570348	0.0693624	0.0659637	0.0641203
																					41.2	0.0756651	0.0752077	0.0722163	0.074363		0.0567717	0.0695757	0.0661223	0.0641566
																					41.225	0.0758255	0.074921	0.0724449	0.0743972		0.0574759	0.0694139	0.0658052	0.0642317
																					41.25	0.0760848	0.0749154	0.0719543	0.0743182		0.0568784	0.0694436	0.0658945	0.0640722
																					41.275	0.0758578	0.0749381	0.072299	0.074365		0.0578959	0.0694128	0.0659074	0.0644053
																					41.3	0.0752591	0.0751481	0.0718411	0.0740828		0.0567791	0.0693021	0.0657206	0.063934
																					41.325	0.0756024	0.0745237	0.0721439	0.07409		0.0568099	0.0689063	0.0654693	0.0637285
																					41.35	0.0748365	0.0747337	0.0720491	0.0738731		0.0568921	0.0690896	0.065615	0.0638655
																					41.375	0.0754419	0.0747763	0.071888	0.0740354		0.0565999	0.0689296	0.065878	0.0638025
																					41.4	0.0749628	0.0745549	0.0719597	0.0738258		0.05656	0.0689695	0.0653401	0.0636232
																					41.425	0.0752724	0.0745464	0.071986	0.0739349		0.0565092	0.0690117	0.0654552	0.0636587
																					41.45	0.0749657	0.0744017	0.0722559	0.0738744		0.0567089	0.0688977	0.0656819	0.0637628
																					41.475	0.0759205	0.0742399	0.0716359	0.0739321		0.0562495	0.0691054	0.0655316	0.0636288
																					41.5	0.0750559	0.0745464	0.0722435	0.0739486		0.0576442	0.0690715	0.0655081	0.0640746
																					41.525	0.0754604	0.0746287	0.0721287	0.0740726		0.0573669	0.0691095	0.0654705	0.0639823
																					41.55	0.0754376	0.0744386	0.0722483	0.0740415		0.0564909	0.0690429	0.0653942	0.0636427
																					41.575	0.0751665	0.0742626	0.0719775	0.0738022		0.0565594	0.0686087	0.0654975	0.0635552
																					41.6	0.075779	0.0743477	0.0721018	0.0740762		0.0567124	0.0683611	0.0654118	0.0634951
																					41.625	0.0750587	0.0739674	0.0718798	0.0736353		0.0565617	0.0693014	0.0653719	0.063745
																					41.65	0.0745797	0.0740696	0.0720456	0.073565		0.0566131	0.0689819	0.0650959	0.0635636
																					41.675	0.0753522	0.0743761	0.0718271	0.0738518		0.0573047	0.068357	0.0651393	0.0636003
																					41.7	0.0743047	0.0742938	0.0720358	0.0735448		0.056572	0.0689146	0.0652943	0.0635936
																					41.725	0.0746965	0.0743137	0.0720827	0.0736976		0.0555927	0.0689857	0.0651839	0.0632541
																					41.75	0.074695	0.0740384	0.0715868	0.0734401		0.0562222	0.0688939	0.065238	0.0634514
																					41.775	0.0746889	0.0742115	0.0716565	0.073519		0.0561069	0.0684473	0.0651182	0.0632241
																					41.8	0.0755815	0.0742711	0.0713755	0.0737427		0.0569828	0.0687724	0.0651006	0.0636186
																					41.825	0.0748489	0.0740185	0.0718829	0.0735834		0.0565965	0.0687227	0.064787	0.0633687
																					41.85	0.0749405	0.0742058	0.0711295	0.0734253		0.0560852	0.0681628	0.0647858	0.0630113
																					41.875	0.0744054	0.0742285	0.0716575	0.0734305		0.056411	0.0683807	0.0650019	0.0632645
																					41.9	0.0752681	0.0739305	0.0711237	0.0734408		0.0565554	0.0688107	0.0648962	0.0634208
																					41.925	0.0751323	0.0739532	0.0712728	0.0734528		0.0570844	0.0685586	0.0647529	0.0634653
																					41.95	0.0745944	0.0739022	0.0714745	0.0733237		0.056944	0.0682599	0.0648528	0.0633522
																					41.975	0.0740265	0.0737432	0.0715351	0.0731016		0.0572008	0.0680597	0.0647154	0.0633253
																					42	0.0746993	0.0740895	0.0716591	0.0734826		0.057158	0.0683453	0.0646966	0.0634
																					42.025	0.0748717	0.0737432	0.0715268	0.0733806		0.0567112	0.0682693	0.0646273	0.0632026
																					42.05	0.0744082	0.0735616	0.0714421	0.0731373		0.057065	0.0681451	0.0647647	0.0633249
																					42.075	0.0750516	0.0739731	0.0709953	0.07334		0.0564653	0.0682994	0.0647753	0.06318
																					42.1	0.0749215	0.0735446	0.0709392	0.0731351		0.0567917	0.068337	0.06476	0.0632962
																					42.125	0.0749087	0.0739362	0.0714662	0.0734371		0.0550278	0.067627	0.0648105	0.0624884
																					42.15	0.0751979	0.0737659	0.0709249	0.0732962		0.055583	0.0680608	0.0645439	0.0627292
																					42.175	0.0744671	0.0734083	0.0712779	0.0730511		0.0565543	0.0679118	0.0647435	0.0630699
																					42.2	0.0739083	0.0736042	0.070897	0.0728031		0.0559636	0.067802	0.0644969	0.0627542
																					42.225	0.0736576	0.0734282	0.070878	0.0726546		0.0557765	0.068059	0.0645181	0.0627845
																					42.25	0.0746741	0.0739873	0.0708976	0.0731864		0.056455	0.0678569	0.0643889	0.0629003
																					42.275	0.074497	0.0736269	0.0707035	0.0729425		0.0563648	0.0675043	0.0646343	0.0628345
																					42.3	0.0745564	0.0734651	0.0711044	0.073042		0.05633	0.0677399	0.0644793	0.0628497
																					42.325	0.0746889	0.0733743	0.070538	0.072867		0.0560116	0.0674795	0.064437	0.0626427
																					42.35	0.0740531	0.073326	0.0705053	0.0726282		0.0560612	0.0675179	0.0644828	0.0626873
																					42.375	0.0741058	0.0737773	0.0708637	0.0729156		0.0555967	0.0675758	0.0645686	0.0625804
																					42.4	0.0738636	0.0730791	0.0707543	0.0725657		0.0557913	0.0676575	0.0644347	0.0626278
																					42.425	0.0737986	0.0730365	0.0703376	0.0723909		0.0561348	0.0675495	0.0643807	0.0626883
																					42.45	0.0735569	0.0731359	0.0703109	0.0723346		0.0574462	0.067437	0.0642104	0.0630312
																					42.475	0.0729753	0.0732806	0.0694204	0.0718921		0.0554877	0.0670344	0.0641188	0.0622136
																					42.5	0.074177	0.0731018	0.0702659	0.0725149		0.0559591	0.0678829	0.0641904	0.0626775
																					42.525	0.0737939	0.0730195	0.0701039	0.0723057		0.0560099	0.0676074	0.0641446	0.0625873
																					42.55	0.0740906	0.0728833	0.0695559	0.0721766		0.0551373	0.0672007	0.0640518	0.0621299
																					42.575	0.073546	0.0727357	0.0702732	0.072185		0.0562621	0.0677233	0.0641763	0.0627206
																					42.6	0.0737468	0.0731188	0.0698616	0.0722424		0.0559739	0.0672146	0.0639884	0.0623923
																					42.625	0.0737506	0.0727215	0.0698226	0.0720982		0.0555043	0.0676394	0.0640201	0.0623879
																					42.65	0.0733917	0.0726761	0.0698923	0.0719867		0.0559751	0.067525	0.0640072	0.0625024
																					42.675	0.073716	0.072889	0.0697883	0.0721311		0.0559026	0.0672699	0.0642021	0.0624582
																					42.7	0.0738575	0.0726704	0.0701603	0.0722294		0.055817	0.0681444	0.0638193	0.0625936
																					42.725	0.0743622	0.0730621	0.0698327	0.072419		0.0562433	0.0674306	0.0638451	0.0625063
																					42.75	0.0737274	0.0724434	0.0700455	0.0720721		0.0550797	0.0673986	0.0638721	0.0621168
																					42.775	0.0732132	0.0723724	0.0691664	0.071584		0.055365	0.0674818	0.0638287	0.0622252
																					42.8	0.0735142	0.0724263	0.0698086	0.0719164		0.0562347	0.0672127	0.0638122	0.0624199
																					42.825	0.072746	0.0724519	0.0696348	0.0716109		0.0558621	0.0678234	0.0637406	0.0624754
																					42.85	0.0732796	0.0724292	0.0694759	0.0717283		0.0554974	0.067355	0.0635973	0.0621499
																					42.875	0.0729273	0.0725455	0.0698295	0.0717675		0.055143	0.067411	0.0637805	0.0621115
																					42.9	0.0733551	0.0725228	0.0690532	0.0716437		0.0554774	0.0673813	0.0636678	0.0621755
																					42.925	0.0733822	0.072415	0.0701524	0.0719832		0.0551345	0.0670901	0.06375	0.0619915
																					42.95	0.0735422	0.0719666	0.0699263	0.0718117		0.0551721	0.0676612	0.0636102	0.0621479
																					42.975	0.0731842	0.0725739	0.0699231	0.0718937		0.0552429	0.0673448	0.063467	0.0620182
																					43	0.0725902	0.0721823	0.0698603	0.0715443		0.0551305	0.0674464	0.0636514	0.0620761
																					43.025	0.0726505	0.0725512	0.0691782	0.07146		0.0549524	0.0668466	0.0635774	0.0617921
																					43.05	0.072406	0.0724491	0.0693653	0.0714068		0.0547692	0.0663255	0.0635198	0.0615382
																					43.075	0.0726819	0.0722248	0.0693995	0.0714354		0.0552212	0.0672041	0.0634505	0.0619586
																					43.1	0.0729639	0.0721652	0.0692987	0.0714759		0.0556578	0.0670246	0.0635292	0.0620705
																					43.125	0.0730669	0.0723213	0.0692508	0.0715463		0.055349	0.0669625	0.0633495	0.061887
																					43.15	0.0728039	0.0717197	0.0691043	0.0712093		0.0549302	0.0667793	0.0630148	0.0615748
																					43.175	0.072312	0.0719609	0.0690145	0.0710958		0.0543783	0.067081	0.0632908	0.0615834
																					43.2	0.0729364	0.0726534	0.0697547	0.0717815		0.0550626	0.0666799	0.0631546	0.0616324
																					43.225	0.0728224	0.0721965	0.0693215	0.0714468		0.0557542	0.0666322	0.0630595	0.0618153
																					43.25	0.0726334	0.0716061	0.0689092	0.0710496		0.0550551	0.0666092	0.06307	0.0615781
																					43.275	0.0727403	0.0724576	0.0692042	0.0714673		0.0558609	0.0672172	0.0629561	0.0620114
																					43.3	0.0721662	0.0719013	0.0691081	0.0710585		0.0545484	0.0663262	0.0629737	0.0612828
																					43.325	0.0727721	0.0718587	0.0691835	0.0712714		0.0556081	0.0664324	0.0628363	0.0616256
																					43.35	0.0724877	0.0719297	0.0690272	0.0711482		0.0553941	0.0666069	0.0628363	0.0616125
																					43.375	0.0728286	0.071643	0.0684817	0.0709844		0.0554626	0.0660252	0.0626273	0.0613717
																					43.4	0.0729815	0.0716146	0.0687345	0.0711102		0.055345	0.066409	0.062605	0.061453
																					43.425	0.0731135	0.0717225	0.0685664	0.0711341		0.0551168	0.0668918	0.0627764	0.061595
																					43.45	0.0718975	0.0712429	0.0685401	0.0705601		0.055236	0.0666641	0.0627694	0.0615565
																					43.475	0.0725413	0.0714671	0.0692971	0.0711018		0.0551316	0.0664414	0.0627788	0.0614506
																					43.5	0.0724554	0.0715522	0.0687335	0.0709137		0.0553542	0.066482	0.0629138	0.0615833
																					43.525	0.0722825	0.0713933	0.0686	0.0707586		0.0555984	0.0660425	0.0625004	0.0613805
																					43.55	0.0731035	0.0714387	0.0684269	0.0709897		0.0543898	0.0668684	0.0625392	0.0612658
																					43.575	0.0728742	0.07124	0.0686974	0.0709372		0.0546985	0.0660358	0.0625368	0.0610904
																					43.6	0.0725727	0.0713819	0.0681589	0.0707045		0.0553342	0.0664752	0.0621047	0.0613047
																					43.625	0.0727512	0.0715806	0.068594	0.0709753		0.0549011	0.0660463	0.0624065	0.061118
																					43.65	0.0722099	0.0710754	0.0687488	0.070678		0.0548526	0.0662122	0.0624077	0.0611575
																					43.675	0.0724464	0.0711691	0.0684281	0.0706812		0.0545125	0.066374	0.0625145	0.0611337
																					43.7	0.0710528	0.0715692	0.0685994	0.0704071		0.0539041	0.0661825	0.0623724	0.0608197
																					43.725	0.0728599	0.0716288	0.0684377	0.0709755		0.0550312	0.0662894	0.0623513	0.061224
																					43.75	0.0726016	0.0709846	0.0688303	0.0708055		0.0547721	0.0661637	0.0621986	0.0610448
																					43.775	0.0726823	0.0712145	0.068536	0.0708109		0.0547613	0.0661915	0.0620917	0.0610149
																					43.8	0.0718267	0.0708682	0.0685322	0.070409		0.0551019	0.0662559	0.0623419	0.0612332
																					43.825	0.0709982	0.0714813	0.068712	0.0703971		0.054246	0.0657942	0.062437	0.0608257
																					43.85	0.072207	0.0708966	0.068117	0.0704069		0.0553342	0.066166	0.0620753	0.0611918
																					43.875	0.0718989	0.071257	0.0683159	0.0704906		0.053778	0.0661532	0.0622104	0.0607138
																					43.9	0.0718999	0.0714131	0.0679455	0.0704195		0.0538676	0.0660196	0.0620882	0.0606585
																					43.925	0.0718073	0.0713706	0.0680327	0.0704035		0.0552749	0.0661479	0.0623666	0.0612631
																					43.95	0.071915	0.071257	0.0686666	0.0706129		0.0539013	0.0655967	0.062282	0.0605933
																					43.975	0.0711245	0.070749	0.0683749	0.0700828		0.0543829	0.0658687	0.0621528	0.0608015
																					44	0.0721814	0.071047	0.0682363	0.0704882		0.0542032	0.0660734	0.0618592	0.0607119
																					44.025	0.0718324	0.0710101	0.068646	0.0704962		0.0545153	0.0658074	0.0619837	0.0607688
																					44.05	0.07167	0.070749	0.0681919	0.0702037		0.0529819	0.0656482	0.061952	0.060194
																					44.075	0.0714231	0.0709903	0.0680987	0.0701707		0.0536553	0.0662213	0.0618299	0.0605688
																					44.1	0.07167	0.071345	0.0682664	0.0704272		0.0540417	0.0661163	0.0620025	0.0607202
																					44.125	0.0713025	0.0709959	0.0682797	0.0701927		0.0540228	0.065883	0.0619508	0.0606189
																					44.15	0.0719497	0.0710186	0.0676496	0.070206		0.0540428	0.0655165	0.0619144	0.0604912
																					44.175	0.0717408	0.071311	0.0677644	0.0702721		0.0537398	0.0655304	0.0617195	0.0603299
																					44.2	0.070888	0.0712485	0.0680159	0.0700508		0.053915	0.0655989	0.0618721	0.060462
																					44.225	0.0708956	0.0708143	0.067636	0.069782		0.0544434	0.0661961	0.0618651	0.0608348
																					44.25	0.0710461	0.07082	0.0677397	0.0698686		0.0534236	0.0656339	0.0620025	0.0603533
																					44.275	0.0717864	0.0709959	0.0682794	0.0703539		0.0542659	0.0661641	0.0616079	0.0606793
																					44.3	0.0712408	0.0705589	0.0677397	0.0698465		0.0540947	0.0660915	0.0616361	0.0606074
																					44.325	0.0712855	0.0704993	0.0670429	0.0696092		0.0538796	0.0653182	0.0618017	0.0603332
																					44.35	0.0712332	0.070925	0.067674	0.0699441		0.0536365	0.0656952	0.06175	0.0603606
																					44.375	0.071548	0.0707944	0.0673769	0.0699064		0.0541541	0.0653498	0.0616549	0.0603863
																					44.4	0.0707822	0.0706355	0.0673639	0.0695938		0.0537723	0.0655432	0.0614999	0.0602718
																					44.425	0.0708121	0.0703914	0.0675135	0.0695723		0.0537398	0.065436	0.0616044	0.0602601
																					44.45	0.071059	0.070241	0.0674292	0.0695764		0.0543024	0.0654179	0.0614646	0.060395
																					44.475	0.0701773	0.0703403	0.0671076	0.0692084		0.0527982	0.0652682	0.0611957	0.059754
																					44.5	0.0708339	0.0707434	0.0672805	0.0696192		0.0538288	0.0662732	0.0612802	0.0604607
																					44.525	0.0695923	0.0703432	0.067459	0.0691315		0.0539652	0.0653792	0.0613331	0.0602258
																					44.55	0.0708947	0.0701956	0.0674051	0.0694985		0.0538745	0.065243	0.0614752	0.0601976
																					44.575	0.070634	0.0704198	0.066592	0.0692153		0.0550066	0.0648001	0.0612896	0.0603654
																					44.6	0.0712332	0.0697699	0.0672966	0.0694332		0.0539081	0.0651342	0.0613448	0.0601291
																					44.625	0.070362	0.069611	0.0668799	0.0689509		0.0536884	0.0650966	0.0612321	0.0600057
																					44.65	0.0708615	0.0703063	0.0671986	0.0694555		0.0526852	0.0650225	0.0610442	0.059584
																					44.675	0.0707185	0.0701161	0.0669256	0.0692534		0.0537997	0.0650496	0.0609996	0.0599496
																					44.7	0.0698273	0.0699544	0.06654	0.0687739		0.0530419	0.0650067	0.0613166	0.0597884
																					44.725	0.0703434	0.0701701	0.0667715	0.069095		0.0528507	0.0654134	0.0612415	0.0598352
																					44.75	0.0707337	0.0705305	0.066969	0.0694111		0.0528672	0.0647595	0.0609232	0.0595166
																					44.775	0.0699631	0.0700707	0.0669678	0.0690005		0.0532342	0.0649559	0.0611969	0.0597956
																					44.8	0.0706796	0.0698607	0.0668111	0.0691171		0.0525693	0.0650134	0.0610865	0.0595564
																					44.825	0.0702713	0.0703063	0.0667401	0.0691059		0.0529574	0.0651022	0.0610571	0.0597056
																					44.85	0.070861	0.0697245	0.0664991	0.0690282		0.0531537	0.0645055	0.0609702	0.0595431
																					44.875	0.070351	0.0700168	0.0670226	0.0691302		0.0524147	0.0647038	0.0608751	0.0593312
																					44.9	0.0694988	0.0699203	0.0671165	0.0688452		0.053459	0.0647531	0.0607177	0.0596433
																					44.925	0.0703458	0.069855	0.0666522	0.068951		0.0529317	0.0643979	0.0607929	0.0593741
																					44.95	0.0707076	0.0702041	0.0668907	0.0692675		0.05333	0.0646624	0.0607553	0.0595826
																					44.975	0.0700951	0.0695145	0.0664499	0.0686865		0.0533609	0.0647851	0.0608387	0.0596615
																					45	0.0705799	0.0698295	0.0666516	0.0690203		0.0539287	0.0645044	0.0608715	0.0597682
																					45.025	0.0701155	0.0700054	0.0664315	0.0688508		0.0536005	0.0643508	0.0606214	0.0595242
																					45.05	0.0694446	0.0696024	0.0670036	0.0686836		0.0528998	0.0648513	0.0604934	0.0594148
																					45.075	0.0700229	0.0696989	0.0663414	0.0686878		0.0532079	0.0644374	0.0607494	0.0594649
																					45.1	0.0706302	0.0697954	0.0661689	0.0688649		0.0524512	0.0649198	0.0604769	0.0592826
																					45.125	0.0695443	0.0697245	0.0664512	0.0685733		0.0531081	0.0640543	0.0605333	0.0592319
																					45.15	0.0696075	0.0697954	0.0662206	0.0685412		0.0530869	0.0647557	0.0603971	0.0594132
																					45.175	0.0702404	0.0696677	0.0663982	0.0687688		0.0533706	0.065068	0.0603865	0.0596084
																					45.2	0.0695192	0.0696166	0.0662796	0.0684718		0.0523708	0.0642489	0.0602291	0.0589496
																					45.225	0.0704645	0.069523	0.0663196	0.068769		0.0532113	0.0644893	0.0601833	0.0592947
																					45.25	0.0701872	0.0694463	0.066284	0.0686392		0.0532524	0.064253	0.0604476	0.0593177
																					45.275	0.0694769	0.0696393	0.0662403	0.0684522		0.0531166	0.0648039	0.0603149	0.0594118
																					45.3	0.0699498	0.0696195	0.0661058	0.0685584		0.053447	0.0647854	0.0602667	0.0594997
																					45.325	0.0698506	0.0694634	0.0660281	0.0684474		0.0533203	0.0645871	0.0602843	0.0593973
																					45.35	0.0701939	0.0692023	0.0661946	0.0685302		0.0529237	0.0654112	0.0604863	0.0596071
																					45.375	0.0706535	0.0694236	0.0658023	0.0686265		0.0528558	0.064405	0.0602385	0.0591665
																					45.4	0.0705775	0.069469	0.0661286	0.0687251		0.0530898	0.0647452	0.0602115	0.0593488
																					45.425	0.0695405	0.0687226	0.0661182	0.0681271		0.0531497	0.0646515	0.0603889	0.0593967
																					45.45	0.0702912	0.0687397	0.0658416	0.0682908		0.0538944	0.0639591	0.0600483	0.0593006
																					45.475	0.0693563	0.068629	0.0660709	0.0680187		0.0524421	0.0642406	0.0600142	0.058899
																					45.5	0.0697784	0.0691994	0.0661436	0.0683738		0.0530076	0.0643535	0.060174	0.0591783
																					45.525	0.0700177	0.0694293	0.0656967	0.0683812		0.0530128	0.0637349	0.059959	0.0589022
																					45.55	0.0693677	0.0694265	0.066167	0.0683204		0.0526903	0.064019	0.0602209	0.0589767
																					45.575	0.0695714	0.0685495	0.0655137	0.0678782		0.0536119	0.0641842	0.0598804	0.0592255
																					45.6	0.0696588	0.0687538	0.0661115	0.0681747		0.052966	0.0639053	0.0599144	0.0589286
																					45.625	0.069024	0.0690717	0.0655302	0.0678753		0.0528923	0.0638956	0.0603513	0.0590464
																					45.65	0.0703567	0.0688361	0.0659783	0.0683904		0.0522983	0.0639832	0.0599461	0.0587425
																					45.675	0.0694845	0.0689894	0.0657716	0.0680818		0.0524598	0.0641239	0.0599907	0.0588582
																					45.7	0.0696858	0.0691058	0.0656127	0.0681348		0.0521396	0.0646703	0.0600659	0.0589586
																					45.725	0.069974	0.0687255	0.0659247	0.0682081		0.0530647	0.0636457	0.0598745	0.0588616
																					45.75	0.070041	0.0685126	0.0657693	0.0681076		0.0524592	0.0638425	0.0598745	0.0587254
																					45.775	0.0693615	0.0681607	0.0650615	0.0675279		0.0519165	0.0636751	0.0596784	0.0584233
																					45.8	0.0688369	0.0685438	0.0656704	0.0676837		0.0522909	0.0630952	0.0597688	0.058385
																					45.825	0.0693729	0.0687482	0.0654598	0.0678603		0.0522777	0.0631182	0.0599121	0.058436
																					45.85	0.0689798	0.068663	0.0657849	0.0678092		0.052227	0.0638481	0.0597394	0.0586049
																					45.875	0.0693236	0.0689298	0.0652115	0.0678216		0.0513772	0.0637176	0.0599426	0.0583458
																					45.9	0.0692058	0.068768	0.0650751	0.067683		0.0514908	0.0638331	0.0596572	0.058327
																					45.925	0.0684708	0.0681351	0.0648256	0.0671438		0.0521762	0.0633368	0.0597065	0.0584065
																					45.95	0.0683184	0.0682373	0.0652584	0.0672714		0.0513293	0.0638308	0.0597253	0.0582952
																					45.975	0.069616	0.0685041	0.0649895	0.0677032		0.0518252	0.0636657	0.0598463	0.0584457
																					46	0.0683616	0.0681096	0.0651135	0.0671949		0.0519462	0.0634072	0.0596032	0.0583189
																					46.025	0.0691821	0.0684019	0.0651459	0.0675766		0.0514314	0.0630497	0.0598181	0.0580997
																					46.05	0.0689062	0.0683281	0.065228	0.0674874		0.0522036	0.0637213	0.0595715	0.0584988
																					46.075	0.0685596	0.0681209	0.0651779	0.0672861		0.0512317	0.0635328	0.0595762	0.0581136
																					46.1	0.0681769	0.0682203	0.0653431	0.0672468		0.0518965	0.0635893	0.0597547	0.0584135
																					46.125	0.0688673	0.0683679	0.0645503	0.0672618		0.0512757	0.062845	0.0597065	0.0579424
																					46.15	0.0679015	0.0678031	0.0651687	0.0669578		0.0513875	0.0633071	0.0595186	0.0580711
																					46.175	0.0694185	0.0677066	0.0651211	0.0674154		0.0516603	0.0632273	0.0595703	0.0581526
																					46.2	0.067629	0.0680301	0.0646699	0.0667763		0.0511455	0.0632205	0.0594	0.057922
																					46.225	0.0684323	0.0677378	0.0647054	0.0669585		0.0510719	0.0634692	0.0595233	0.0580215
																					46.25	0.0681631	0.0675363	0.0656828	0.0671274		0.0508636	0.0634117	0.0594176	0.0578976
																					46.275	0.0679414	0.0677151	0.0646882	0.0667816		0.0516021	0.0633518	0.0594822	0.0581454
																					46.3	0.0684642	0.0675987	0.064732	0.0669316		0.051476	0.0632491	0.0594223	0.0580492
																					46.325	0.0682462	0.0674057	0.0647041	0.0667854		0.0516529	0.0632228	0.0593824	0.058086
																					46.35	0.0680838	0.0670992	0.0644656	0.0665496		0.0520763	0.0632766	0.0590688	0.0581406
																					46.375	0.0673303	0.0674341	0.0644253	0.0663966		0.0520712	0.0637759	0.0592626	0.0583699
																					46.4	0.0680572	0.0676328	0.0646251	0.0667717		0.0509327	0.0631321	0.0593213	0.0577954
																					46.425	0.0672914	0.0669431	0.0650114	0.0664153		0.0511883	0.062702	0.0589855	0.0576253
																					46.45	0.0672828	0.0675845	0.0648741	0.0665805		0.0510074	0.0629696	0.0591687	0.0577152
																					46.475	0.0667776	0.0675391	0.0645988	0.0663052		0.0515593	0.0633688	0.0590101	0.0579794
																					46.5	0.0685748	0.0674285	0.0642874	0.0667635		0.0516089	0.06262	0.0590665	0.0577651
																					46.525	0.0679286	0.0672099	0.0651161	0.0667515		0.0510035	0.0631705	0.0589702	0.0577147
																					46.55	0.0677781	0.0672014	0.0647463	0.0665752		0.0518651	0.0628631	0.0589819	0.0579034
																					46.575	0.0676029	0.0672837	0.0644076	0.0664314		0.0515952	0.0626369	0.0589925	0.0577415
																					46.6	0.0682733	0.0672298	0.0649343	0.0668125		0.0509584	0.0626091	0.0591217	0.0575631
																					46.625	0.0674428	0.0669375	0.0646664	0.0663489		0.0511353	0.063026	0.0587799	0.0576471
																					46.65	0.0675107	0.066875	0.0646061	0.0663306		0.0528467	0.0629368	0.0588774	0.0582203
																					46.675	0.0674134	0.0671588	0.0645056	0.0663593		0.0506981	0.0625579	0.0588175	0.0573578
																					46.7	0.0680093	0.0671361	0.0650317	0.0667257		0.050709	0.06243	0.0588234	0.0573208
																					46.725	0.0672263	0.0672071	0.0648386	0.066424		0.0514537	0.0625918	0.0584464	0.0574973
																					46.75	0.0677861	0.0669857	0.0647263	0.0664994		0.0514954	0.0621719	0.0586895	0.0574523
																					46.775	0.0677396	0.0671446	0.0643584	0.0664142		0.0509498	0.0623453	0.0585897	0.0572949
																					46.8	0.0668474	0.0666962	0.0649892	0.0661776		0.0515433	0.0622268	0.0584523	0.0574075
																					46.825	0.0677781	0.0666451	0.0643683	0.0662638		0.0516597	0.061963	0.0588175	0.0574801
																					46.85	0.0680691	0.066682	0.0643597	0.0663703		0.0508739	0.0623536	0.0584511	0.0572262
																					46.875	0.0675734	0.0669403	0.0643163	0.0662767		0.0506742	0.0622276	0.05841	0.0571039
																					46.9	0.0679219	0.0664607	0.0641764	0.0661863		0.0509738	0.062515	0.0581751	0.0572213
																					46.925	0.0667558	0.0665089	0.0643055	0.0658567		0.0520677	0.0621963	0.0583959	0.0575533
																					46.95	0.0678417	0.0665259	0.0639547	0.0661074		0.0509053	0.0619871	0.0583642	0.0570855
																					46.975	0.0672895	0.0664663	0.0639804	0.0659121		0.0506673	0.0620537	0.0584405	0.0570539
																					47	0.067138	0.0666678	0.0638726	0.0658928		0.0510371	0.061954	0.0583689	0.05712
																					47.025	0.0676798	0.0666338	0.0643651	0.0662262		0.0507039	0.0617599	0.0582679	0.0569106
																					47.05	0.0674367	0.0662052	0.0637194	0.0657871		0.0508283	0.062307	0.0582268	0.0571207
																					47.075	0.067477	0.0663613	0.063779	0.0658725		0.0508654	0.0618998	0.0581634	0.0569762
																					47.1	0.0679452	0.0667047	0.0643657	0.0663386		0.0511199	0.0614803	0.0580671	0.0568891
																					47.125	0.0668892	0.0666593	0.0637077	0.0657521		0.051262	0.0620037	0.0581599	0.0571418
																					47.15	0.0669372	0.066052	0.0638127	0.0656006		0.0508026	0.0618366	0.0579849	0.0568747
																					47.175	0.0674979	0.0664124	0.0637578	0.0658894		0.050693	0.0616846	0.0582362	0.0568713
																					47.2	0.0675008	0.0663301	0.0640971	0.065976		0.0510651	0.0614257	0.0581223	0.056871
																					47.225	0.0674865	0.0663386	0.0633319	0.065719		0.0507176	0.0611804	0.0579238	0.0566073
																					47.25	0.0664282	0.0659016	0.0633519	0.0652272		0.0509858	0.0618257	0.0579027	0.0569047
																					47.275	0.0668569	0.0658817	0.0639557	0.0655648		0.0508659	0.0613038	0.0579907	0.0567202
																					47.3	0.0672719	0.0662137	0.0635041	0.0656633		0.0511336	0.0617	0.0577406	0.0568581
																					47.325	0.0671432	0.0659016	0.0633874	0.0654774		0.0512249	0.0615826	0.0580612	0.0569562
																					47.35	0.0678521	0.0658249	0.0632786	0.0656519		0.0509475	0.0612617	0.0578369	0.056682
																					47.375	0.0669927	0.065964	0.0632647	0.0654071		0.0501572	0.0616195	0.0577101	0.0564956
																					47.4	0.0662117	0.0659299	0.0635047	0.0652154		0.0510685	0.0615145	0.0574928	0.0566919
																					47.425	0.0671375	0.0658618	0.0629843	0.0653279		0.0503615	0.0612489	0.0575503	0.0563869
																					47.45	0.0663845	0.065297	0.063023	0.0649015		0.0497839	0.061472	0.0579461	0.0564007
																					47.475	0.0671912	0.065473	0.0629897	0.065218		0.0499135	0.0609708	0.0577664	0.0562169
																					47.5	0.0670378	0.0659016	0.0631372	0.0653589		0.0494113	0.0612267	0.0573378	0.0559919
																					47.525	0.0671622	0.0656149	0.063584	0.0654537		0.0506553	0.0613554	0.0575715	0.0565274
																					47.55	0.0660569	0.0652914	0.0635656	0.0649713		0.0504248	0.0612444	0.0576654	0.0564449
																					47.575	0.066743	0.0657738	0.0628692	0.0651287		0.0493497	0.0609761	0.0574493	0.055925
																					47.6	0.0663195	0.0656007	0.0631426	0.0650209		0.0504767	0.0609178	0.0575985	0.056331
																					47.625	0.0671328	0.0658192	0.0632526	0.0654016		0.0502679	0.0607236	0.0574118	0.0561344
																					47.65	0.0664097	0.0655014	0.0630639	0.0649917		0.0505555	0.0613663	0.0573554	0.0564257
																					47.675	0.0658261	0.065578	0.062893	0.0647657		0.0501897	0.0612075	0.0575316	0.0563096
																					47.7	0.0665227	0.065297	0.0632174	0.0650124		0.0502964	0.0608899	0.0575374	0.0562412
																					47.725	0.0663161	0.0649338	0.0635602	0.0649367		0.0497976	0.0611447	0.0577347	0.0562257
																					47.75	0.0659111	0.0654844	0.0633125	0.0649027		0.04974	0.0609817	0.0573096	0.0560104
																					47.775	0.0662962	0.0652885	0.063329	0.0649712		0.0505829	0.0601976	0.0573636	0.056048
																					47.8	0.0658798	0.0654134	0.0630921	0.0647951		0.0511587	0.0606247	0.0571757	0.0563197
																					47.825	0.0652426	0.0654248	0.0629634	0.0645436		0.050463	0.0606781	0.0574364	0.0561925
																					47.85	0.0668455	0.0654333	0.0630068	0.0650952		0.0499403	0.060166	0.0572673	0.0557912
																					47.875	0.066318	0.0650359	0.0633106	0.0648882		0.0500265	0.060847	0.0568997	0.0559244
																					47.9	0.0662183	0.0650217	0.0634169	0.0648856		0.0497971	0.0607962	0.0572344	0.0559426
																					47.925	0.0660132	0.0649536	0.0633807	0.0647825		0.0505737	0.0605727	0.0569984	0.0560483
																					47.95	0.065631	0.0651523	0.0631727	0.064652		0.0498296	0.0609682	0.0570947	0.0559642
																					47.975	0.0660631	0.0648543	0.0630268	0.0646481		0.0499569	0.0609479	0.0569303	0.055945
																					48	0.0660237	0.0644399	0.0634207	0.0646281		0.0500584	0.0604553	0.0570031	0.0558389
																					48.025	0.0653228	0.0652715	0.0628581	0.0644841		0.0499991	0.0604027	0.056861	0.0557542
																					48.05	0.0655389	0.0650076	0.0630623	0.0645363		0.0493599	0.0607458	0.0569995	0.0557018
																					48.075	0.0658228	0.0649025	0.0630071	0.0645775		0.0501737	0.0609023	0.0568469	0.0559743
																					48.1	0.0662359	0.0647323	0.0633601	0.0647761		0.0498416	0.060549	0.0566038	0.0556648
																					48.125	0.0660199	0.0645222	0.0630493	0.0645305		0.049356	0.0605377	0.0569526	0.0556154
																					48.15	0.0650569	0.064948	0.0636436	0.0645495		0.0494404	0.0606457	0.0566143	0.0555668
																					48.175	0.0650308	0.0643236	0.0628372	0.0640639		0.0501144	0.0606867	0.0566108	0.055804
																					48.2	0.0649278	0.064562	0.0632146	0.0642348		0.049554	0.0601927	0.0565415	0.0554294
																					48.225	0.0649321	0.0646528	0.0629612	0.064182		0.0485468	0.0605182	0.056639	0.0552347
																					48.25	0.0660821	0.0646386	0.0627021	0.0644742		0.0497936	0.060353	0.0567048	0.0556171
																					48.275	0.0653523	0.0645733	0.0629881	0.0643046		0.049126	0.0603801	0.0566143	0.0553735
																					48.3	0.0658532	0.0643264	0.0625613	0.064247		0.049716	0.0603914	0.0567341	0.0556138
																					48.325	0.0650731	0.0647209	0.0628213	0.0642051		0.0498964	0.0603759	0.0567294	0.0556673
																					48.35	0.0656747	0.0644768	0.0630287	0.0643934		0.0497292	0.0597088	0.0564382	0.0552921
																					48.375	0.0652616	0.0648515	0.0628968	0.0643366		0.049667	0.0599696	0.0564135	0.05535
																					48.4	0.0648846	0.0643491	0.0625403	0.0639247		0.0492401	0.060087	0.0564053	0.0552441
																					48.425	0.0648471	0.0645194	0.0628917	0.0640861		0.0500824	0.0594439	0.0567059	0.0554108
																					48.45	0.0650574	0.064562	0.0627354	0.0641183		0.0484497	0.060473	0.0565603	0.055161
																					48.475	0.0648684	0.0645563	0.0622102	0.0638783		0.049534	0.0597472	0.0562562	0.0551791
																					48.5	0.0649667	0.0642753	0.0627592	0.0640004		0.049013	0.0597133	0.056356	0.0550274
																					48.525	0.0643186	0.064772	0.062494	0.0638615		0.0488481	0.0593928	0.0564476	0.0548961
																					48.55	0.064349	0.0644144	0.0622191	0.0636608		0.0493651	0.0597777	0.0563243	0.0551557
																					48.575	0.0646358	0.0643065	0.0621525	0.0636983		0.0493948	0.0597175	0.0562562	0.0551228
																					48.6	0.0649981	0.0648231	0.0624379	0.0640863		0.048327	0.0593551	0.0564382	0.0547068
																					48.625	0.0646932	0.0648089	0.0622422	0.0639148		0.0485279	0.0598729	0.0562949	0.0548986
																					48.65	0.0646334	0.0641845	0.0619961	0.0636047		0.0485536	0.0595237	0.0562491	0.0547755
																					48.675	0.0652165	0.0643122	0.0617101	0.0637463		0.0491243	0.0594469	0.0562926	0.0549546
																					48.7	0.064868	0.0640483	0.0619419	0.0636194		0.0486266	0.0594503	0.0564241	0.0548337
																					48.725	0.0642816	0.064	0.0617948	0.0633588		0.0484292	0.0594733	0.0562068	0.0547031
																					48.75	0.0646676	0.0643661	0.0622365	0.0637568		0.0487893	0.0596336	0.0560213	0.0548147
																					48.775	0.064972	0.0638354	0.0617431	0.0635168		0.0492367	0.0594951	0.056107	0.0549463
																					48.8	0.0650332	0.0635573	0.0615744	0.0633883		0.049227	0.0595429	0.0559872	0.054919
																					48.825	0.065594	0.0639716	0.0618607	0.0638088		0.0488298	0.0595113	0.0559074	0.0547495
																					48.85	0.0646121	0.0636623	0.0613064	0.0631936		0.048331	0.0594699	0.055932	0.0545776
																					48.875	0.0648722	0.0639575	0.0612629	0.0633642		0.0484469	0.0594153	0.0559332	0.0545985
																					48.9	0.0651662	0.0641135	0.061451	0.0635769		0.0482626	0.0595482	0.0560577	0.0546228
																					48.925	0.0649981	0.0638695	0.0614278	0.0634318		0.0490609	0.059243	0.0559954	0.0547664
																					48.95	0.0641572	0.0641221	0.0614402	0.0632398		0.0488201	0.0594255	0.05573	0.0546585
																					48.975	0.0650327	0.0638723	0.0613083	0.0634044		0.0492806	0.0590869	0.0559849	0.0547841
																					49	0.0646011	0.0634154	0.0614519	0.0631562		0.0491979	0.0591779	0.0557923	0.0547227
																					49.025	0.064141	0.0634494	0.0604168	0.0626691		0.0483293	0.0593758	0.0557946	0.0544999
																					49.05	0.0646481	0.0637389	0.0608722	0.0630864		0.0498216	0.0595165	0.0559074	0.0550818
																					49.075	0.0645959	0.0640908	0.0613698	0.0633522		0.0483322	0.0587463	0.0556185	0.0542323
																					49.1	0.0634236	0.0638581	0.061197	0.0628262		0.0485085	0.0592633	0.0555903	0.054454
																					49.125	0.064358	0.0639404	0.0610784	0.0631256		0.0487499	0.0596727	0.0556208	0.0546811
																					49.15	0.0636026	0.0634239	0.0608545	0.062627		0.048448	0.0591915	0.0556443	0.0544279
																					49.175	0.0641724	0.0634835	0.0611646	0.0629402		0.048274	0.0593318	0.0557582	0.0544547
																					49.2	0.0637436	0.0632905	0.0607359	0.06259		0.0483231	0.059395	0.0552497	0.0543226
																					49.225	0.0641173	0.0637361	0.0608741	0.0629092		0.048904	0.0591087	0.0556466	0.0545531
																					49.25	0.0638343	0.0636453	0.0613045	0.062928		0.0486849	0.059071	0.0557523	0.0545028
																					49.275	0.0646439	0.0640568	0.0608101	0.0631702		0.0486637	0.0586835	0.0555597	0.0543023
																					49.3	0.0636534	0.0635431	0.0612116	0.0628027		0.0490843	0.0588528	0.055373	0.0544367
																					49.325	0.0641771	0.0632905	0.0607961	0.0627546		0.0480566	0.0591651	0.0552673	0.054163
																					49.35	0.064689	0.0633842	0.0610096	0.0630276		0.0478277	0.0589156	0.0554717	0.0540717
																					49.375	0.0628258	0.0632281	0.0613958	0.0624832		0.0489902	0.0587407	0.0554118	0.0543809
																					49.4	0.0640485	0.063106	0.0611123	0.0627556		0.048024	0.0586575	0.055292	0.0539912
																					49.425	0.0645461	0.0632281	0.0601251	0.0626331		0.0478038	0.0590673	0.0552192	0.0540301
																					49.45	0.063181	0.0628336	0.0607695	0.0622613		0.0483716	0.0591486	0.0550195	0.0541799
																					49.475	0.0627076	0.0629584	0.0610619	0.0622426		0.0493628	0.0588344	0.0551099	0.0544357
																					49.5	0.0628876	0.0636254	0.0613936	0.0626355		0.0482317	0.0585924	0.0549948	0.0539397
																					49.525	0.0630727	0.062913	0.0611551	0.0623803		0.048161	0.0589766	0.0549573	0.0540316
																					49.55	0.0633814	0.063089	0.0608418	0.0624374		0.0490558	0.0590364	0.0550078	0.0543667
																					49.575	0.0632807	0.0629414	0.0610882	0.0624368		0.047842	0.05827	0.0551487	0.0537536
																					49.6	0.0634654	0.0625469	0.0609483	0.0623202		0.0475818	0.0585687	0.054969	0.0537065
																					49.625	0.0640257	0.0629528	0.0604086	0.0624623		0.048266	0.0583975	0.0550219	0.0538951
																					49.65	0.0635015	0.0626576	0.0610108	0.06239		0.0486289	0.0587505	0.0549385	0.0541059
																					49.675	0.0639967	0.0626604	0.0605719	0.0624097		0.0484372	0.0582301	0.0548375	0.0538349
																					49.7	0.0632987	0.0624675	0.0607831	0.0621831		0.0477838	0.0586154	0.0548938	0.0537643
																					49.725	0.0626953	0.0624504	0.0609357	0.0620271		0.048121	0.0584976	0.0549467	0.0538551
																					49.75	0.0636463	0.0627144	0.0606927	0.0623511		0.0479944	0.0586308	0.0547365	0.0537872
																					49.775	0.064039	0.0629301	0.0605297	0.0624996		0.048884	0.0581962	0.0547788	0.053953
																					49.8	0.0620115	0.062476	0.0607108	0.0617328		0.0481404	0.0580984	0.0548927	0.0537105
																					49.825	0.0632693	0.0624419	0.0603829	0.0620314		0.0476263	0.0589732	0.0548457	0.0538151
																					49.85	0.0631544	0.0625469	0.0607384	0.0621466		0.0479812	0.0583132	0.0545427	0.0536124
																					49.875	0.0624901	0.0628307	0.0601616	0.0618275		0.0478973	0.0585059	0.0546801	0.0536944
																					49.9	0.063445	0.0625554	0.0604831	0.0621612		0.0472371	0.0585292	0.05476	0.0535088
																					49.925	0.0634436	0.0624476	0.0598701	0.0619204		0.0483139	0.0581454	0.054639	0.0536994
[truncated: 2,003 more rows]
